# Supplementary material
Source: HighWire-hosted journal article supplement (https://gut.bmj.com/content/71/11/2266)
Supplement: inline-supplementary-material-1 [file inline-supplementary-material-1.xlsx]

## Sheet: 210302 Sumit Alfred Statistics
GENE			MiaPaca2										PANC1										Miscellaneous													Values
			His-SUMO2 vs Parental					His-SUMO2 (MG132) vs Parental					His-SUMO2 vs Parental					His-SUMO2 (MG132) vs Parental
Fasta headers	Protein names	Gene names	Significant (FDR=0.05 , S0=0.1)	-Log p-value	q-value	Difference (log2)	SUMO?	Significant (FDR=0.05 , S0=0.1)	-Log p-value	q-value	Difference (log2)	SUMO?	Significant (FDR=0.05 , S0=0.1)	-Log p-value	q-value	Difference (log2)	SUMO?	Significant (FDR=0.05 , S0=0.1)	-Log p-value	q-value	Difference (log2)	SUMO?	Peptides	Razor + unique peptides	Unique peptides	Sequence coverage [%]	Unique + razor sequence coverage [%]	Unique sequence coverage [%]	Mol. weight [kDa]	Q-value	Score	Intensity	MS/MS count	Protein IDs	Majority protein IDs	MiaPaca2-1	MiaPaca2-2	MiaPaca2-3	MiaPaca2-HisS2-1	MiaPaca2-HisS2-2	MiaPaca2-HisS2-3	MiaPaca2-HisS2-MG132-1	MiaPaca2-HisS2-MG132-2	MiaPaca2-HisS2-MG132-3	PANC1-1	PANC1-2	PANC1-3	PANC1-HisS2-1	PANC1-HisS2-2
tr|A0A087WZA9|A0A087WZA9_HUMAN Ion channel TACAN (Fragment) OS=Homo sapiens OX=9606 GN=TMEM120A PE=1 SV=1;tr|A0A024R4K9|A0A024R4K9_HUMAN Transmembrane protein 120A OS=Homo sapiens OX=9606 GN=TMEM120A PE=1 SV=1;tr|A0A087X266|A0A087X266_HUMAN Transmembrane p	Transmembrane protein 120A	TMEM120A;TMPIT		NaN	1	0			0.385205	0.375432	0.498175			0.883894	0.361456	-0.266848		+	1.23451	0.0130225	-0.755393		3	3	3	20.7	20.7	20.7	20.459	0	5.5618	236520000	12	A0A087WZA9;A0A024R4K9;A0A087X266;Q9BXJ8-2;Q9BXJ8	A0A087WZA9;A0A024R4K9;A0A087X266;Q9BXJ8-2;Q9BXJ8	22.7678	21.8632	21.7775	22.1883	23.1171	21.2931	23.5198	22.1934	22.1898	23.819	23.7084	24.1032	23.6924	23.4558
sp|O43290|SNUT1_HUMAN U4/U6.U5 tri-snRNP-associated protein 1 OS=Homo sapiens OX=9606 GN=SART1 PE=1 SV=1	U4/U6.U5 tri-snRNP-associated protein 1	SART1	+	2.5168	0.00401717	10.4092	+	+	1.98046	0.00205508	7.39116	+	+	3.51006	0.022	12.1876	+	+	6.31991	0	11.073	+	83	83	83	69.5	69.5	69.5	90.254	0	323.31	413040000000	1973	O43290;E9PQI8	O43290	23.5393	28.0525	22.8963	35.3617	35.1183	35.2358	32.4249	32.0246	32.2122	22.4332	22.7006	22.3365	35.854	35.5738
tr|A0A024RAC6|A0A024RAC6_HUMAN Elongin-A OS=Homo sapiens OX=9606 GN=ELOA PE=1 SV=1;sp|Q14241|ELOA1_HUMAN Elongin-A OS=Homo sapiens OX=9606 GN=ELOA PE=1 SV=2	Transcription elongation factor B polypeptide 3	TCEB3		0.0715551	0.923937	0.240041			0.127061	0.837693	0.406447			0.414987	0.529089	0.569592			1.22873	0.0542548	0.296926		6	6	6	9.6	9.6	9.6	87.229	0	39.633	521730000	34	A0A024RAC6;Q14241	A0A024RAC6;Q14241	22.0206	25.4175	25.6339	24.7964	24.5678	24.4279	24.7949	24.8797	24.6168	24.0924	24.2177	24.0896	23.9338	24.3296
sp|P30414|NKTR_HUMAN NK-tumor recognition protein OS=Homo sapiens OX=9606 GN=NKTR PE=1 SV=2;tr|A0A087WYW3|A0A087WYW3_HUMAN NK-tumor recognition protein OS=Homo sapiens OX=9606 GN=NKTR PE=1 SV=1	NK-tumor recognition protein;Putative peptidyl-prolyl cis-trans isomerase	NKTR	+	4.04288	0	10.34	+	+	3.3698	0.00107339	6.93683	+	+	2.45589	0.01385	8.04229	+	+	3.65526	0	9.06435	+	49	49	49	31.5	31.5	31.5	165.67	0	323.31	54475000000	693	P30414;A0A087WYW3;C9JMM5;A8K7K2	P30414;A0A087WYW3	22.641	21.9916	20.4714	32.2021	32.0183	31.9036	28.5483	28.6022	28.764	23.0879	22.6669	20.8766	31.0844	31.6249
sp|Q9Y2X3|NOP58_HUMAN Nucleolar protein 58 OS=Homo sapiens OX=9606 GN=NOP58 PE=1 SV=1	Nucleolar protein 58	NOP58	+	5.69009	0	10.3223	+	+	6.09613	0	9.81625	+	+	3.22386	0.0192941	11.1546	+	+	4.13199	0	10.3704	+	33	33	33	71.3	71.3	71.3	59.578	0	323.31	182010000000	988	Q9Y2X3;H7BZ72;F8WED0	Q9Y2X3	21.7788	22.1952	21.6057	31.9718	32.0389	32.536	31.6531	31.5712	31.8041	21.3702	23.3911	21.8385	34.4407	34.1709
sp|P46060|RAGP1_HUMAN Ran GTPase-activating protein 1 OS=Homo sapiens OX=9606 GN=RANGAP1 PE=1 SV=1	Ran GTPase-activating protein 1	RANGAP1	+	3.32109	0.000786885	10.1397	+	+	3.34031	0.0011223	9.99877	+	+	3.26535	0.0218667	10.3123	+	+	4.80638	0	11.2499	+	42	42	42	79.4	79.4	79.4	63.541	0	323.31	368460000000	1193	P46060;H0Y4Q3;B0QYT5;B0QYT4;B0QYT6	P46060	21.2105	23.5854	24.3045	33.6973	32.8227	32.9995	32.8191	32.9406	33.3371	22.9033	22.6116	23.1582	34.2584	34.1673
tr|A0A087WT20|A0A087WT20_HUMAN DDB1- and CUL4-associated factor 13 OS=Homo sapiens OX=9606 GN=DCAF13 PE=1 SV=1;sp|Q9NV06|DCA13_HUMAN DDB1- and CUL4-associated factor 13 OS=Homo sapiens OX=9606 GN=DCAF13 PE=1 SV=2;tr|B3KME9|B3KME9_HUMAN DDB1- and CUL4-assoc	DDB1- and CUL4-associated factor 13	DCAF13		0.288649	0.675959	-0.303624			0.636759	0.136124	0.528913			0.109321	0.894537	0.0989138		+	3.92758	0	2.67149	+	12	12	12	27.1	27.1	27.1	67.55	0	35.759	3177000000	50	A0A087WT20;Q9NV06;B3KME9;E5RHM4;A0A087X1F8;Q9NV06-2	A0A087WT20;Q9NV06;B3KME9	25.4075	25.9116	26.5747	25.382	26.1757	25.4252	26.2003	26.5229	26.7574	24.8576	24.5396	24.6683	24.8939	24.1984
sp|Q9H307|PININ_HUMAN Pinin OS=Homo sapiens OX=9606 GN=PNN PE=1 SV=5	Pinin	PNN	+	3.98506	0	10.1131	+	+	3.20999	0.00117073	6.42623	+	+	2.42654	0.0135122	9.80497	+	+	4.58016	0	9.4871	+	44	44	44	53.4	53.4	53.4	81.627	0	323.31	106800000000	754	Q9H307;G3V5F0;G3V579	Q9H307	23.1643	24.5303	22.2937	33.5795	33.2897	33.4586	29.9424	29.6117	29.7129	22.9345	22.258	21.6824	33.5727	33.7727
sp|Q02880-2|TOP2B_HUMAN Isoform Beta-1 of DNA topoisomerase 2-beta OS=Homo sapiens OX=9606 GN=TOP2B;tr|E9PCY5|E9PCY5_HUMAN DNA topoisomerase 2 (Fragment) OS=Homo sapiens OX=9606 GN=TOP2B PE=1 SV=1	DNA topoisomerase 2-beta;DNA topoisomerase 2	TOP2B	+	3.10589	0.00205263	10.0238	+	+	3.52284	0.00102077	11.6478	+	+	2.27016	0.0142353	9.19784	+	+	6.91036	0	11.4595	+	115	115	1	63.6	63.6	1.5	182.66	0	323.31	287530000000	1907	Q02880-2;E9PCY5	Q02880-2;E9PCY5	20.0792	23.29	22.6095	32.9175	31.2349	31.8976	33.789	33.8284	33.3047	22.3907	22.0843	22.4941	33.2299	33.1541
tr|A0A087WTU3|A0A087WTU3_HUMAN Testis-expressed protein 264 OS=Homo sapiens OX=9606 GN=TEX264 PE=1 SV=1;sp|Q9Y6I9|TX264_HUMAN Testis-expressed protein 264 OS=Homo sapiens OX=9606 GN=TEX264 PE=1 SV=1	Testis-expressed sequence 264 protein	TEX264		NaN	1	0			NaN	1	0			0.276843	0.790801	-0.10084			0.425782	0.219898	-1.0643		5	5	5	23.8	23.8	23.8	25.966	0	16.102	637210000	19	A0A087WTU3;Q9Y6I9;C9JXQ7;C9JHH5;C9JL43;C9JUC3;C9J7N0	A0A087WTU3;Q9Y6I9	21.834	22.0516	22.3293	21.9435	21.2875	21.8449	22.1002	23.3363	23.3972	25.5474	25.1539	25.1961	25.3191	25.2194
tr|E7ERS3|E7ERS3_HUMAN Zinc finger CCCH domain-containing protein 18 OS=Homo sapiens OX=9606 GN=ZC3H18 PE=1 SV=1;sp|Q86VM9|ZCH18_HUMAN Zinc finger CCCH domain-containing protein 18 OS=Homo sapiens OX=9606 GN=ZC3H18 PE=1 SV=2	Zinc finger CCCH domain-containing protein 18	ZC3H18	+	4.27596	0	9.9132	+	+	3.09968	0.00116667	5.1726	+	+	2.50496	0.012	7.1799	+	+	4.24383	0	7.21591	+	29	29	29	29.9	29.9	29.9	108.94	0	323.31	22058000000	388	E7ERS3;Q86VM9;H3BP01;H3BRH3;H3BRN6;H3BPD0	E7ERS3;Q86VM9	21.5878	23.329	21.8876	32.1054	32.1014	32.3371	27.7154	27.4972	27.1096	21.1869	22.0927	22.4199	30.0559	30.2338
sp|P49756|RBM25_HUMAN RNA-binding protein 25 OS=Homo sapiens OX=9606 GN=RBM25 PE=1 SV=3	RNA-binding protein 25	RBM25	+	5.36867	0	9.8744	+	+	4.81533	0	8.49349	+	+	2.25285	0.0138286	9.53724	+	+	2.88892	0	9.31381	+	55	55	55	48.3	48.3	48.3	100.18	0	323.31	186890000000	1286	P49756;P49756-2;P49756-3;E9PQU5;H0YE46;E9PSE8;P49756-4	P49756	23.8716	24.5163	23.5427	33.8295	33.8163	33.908	32.3958	32.1946	32.8207	21.9202	25.5353	22.3782	34.4245	33.8664
sp|P49792|RBP2_HUMAN E3 SUMO-protein ligase RanBP2 OS=Homo sapiens OX=9606 GN=RANBP2 PE=1 SV=2	E3 SUMO-protein ligase RanBP2	RANBP2	+	5.12858	0	9.70442	+	+	5.23941	0	9.29888	+		1.18836	0.0677824	4.27521		+	4.95484	0	5.27535	+	124	124	84	51.1	51.1	35.7	358.2	0	323.31	55170000000	1152	P49792;F8VYC4;A0A286YES2;P0DJD0;A0A1W2PNU4;P0DJD1;F8WBP7	P49792	22.0736	22.4123	21.4711	31.3574	31.9304	31.7823	31.3801	31.3814	31.092	25.3818	26.0127	25.6083	31.6849	31.5622
sp|Q96T23|RSF1_HUMAN Remodeling and spacing factor 1 OS=Homo sapiens OX=9606 GN=RSF1 PE=1 SV=2;sp|Q96T23-2|RSF1_HUMAN Isoform 2 of Remodeling and spacing factor 1 OS=Homo sapiens OX=9606 GN=RSF1;tr|H0YER1|H0YER1_HUMAN Remodeling and spacing factor 1 (Fragm	Remodeling and spacing factor 1	RSF1	+	3.47738	0.00090566	9.6307	+	+	3.19373	0.000972973	8.07203	+	+	2.35774	0.0139789	7.14164	+	+	3.36912	0	7.39526	+	63	63	63	47.3	47.3	47.3	163.82	0	323.31	72582000000	975	Q96T23;Q96T23-2;H0YER1;Q96T23-3;H0YCN2;H7C306;H0YDG9;H0YEX0	Q96T23;Q96T23-2;H0YER1;Q96T23-3;H0YCN2	22.3168	25.0308	24.4828	33.8309	33.3157	33.5759	31.9405	31.8889	32.2171	21.14	22.9998	22.5935	30.107	30.8141
sp|Q9NX24|NHP2_HUMAN H/ACA ribonucleoprotein complex subunit 2 OS=Homo sapiens OX=9606 GN=NHP2 PE=1 SV=1;tr|D6RC52|D6RC52_HUMAN Ribonucloprotein (Fragment) OS=Homo sapiens OX=9606 GN=NHP2 PE=1 SV=1;tr|D6RCB9|D6RCB9_HUMAN Ribonucloprotein (Fragment) OS=Homo	H/ACA ribonucleoprotein complex subunit 2	NHP2	+	3.09135	0.0020129	9.47404	+	+	2.46643	0.00134554	6.45008	+	+	2.68539	0.0138909	9.26892	+	+	2.89226	0	7.45932	+	9	9	9	63.4	63.4	63.4	17.201	0	323.31	36187000000	212	Q9NX24;D6RC52;D6RCB9;H0YC83;J3QSY4	Q9NX24;D6RC52;D6RCB9	21.8046	24.4077	20.9916	31.9651	31.5764	32.0845	28.602	28.9226	29.0295	21.5021	20.9016	23.9082	32.1955	32.3948
sp|Q13263|TIF1B_HUMAN Transcription intermediary factor 1-beta OS=Homo sapiens OX=9606 GN=TRIM28 PE=1 SV=5;sp|Q13263-2|TIF1B_HUMAN Isoform 2 of Transcription intermediary factor 1-beta OS=Homo sapiens OX=9606 GN=TRIM28	Transcription intermediary factor 1-beta	TRIM28	+	4.76087	0	9.09243	+	+	4.75841	0	9.23186	+	+	2.06258	0.0147222	8.52659	+	+	2.71788	0	9.30151	+	42	42	42	74	74	74	88.549	0	323.31	277560000000	1318	Q13263;Q13263-2;M0R0K9;M0R3C0;M0R2I3	Q13263;Q13263-2	24.9302	24.6584	23.7357	33.7402	33.4428	33.4185	33.6595	33.465	33.8954	24.1792	26.1894	21.7574	34.0881	33.487
sp|Q86T24|KAISO_HUMAN Transcriptional regulator Kaiso OS=Homo sapiens OX=9606 GN=ZBTB33 PE=1 SV=2	Transcriptional regulator Kaiso	ZBTB33	+	5.47568	0	9.01377	+	+	6.04885	0	11.4906	+	+	2.00864	0.0157055	6.92973	+	+	3.76699	0	9.1327	+	44	44	44	71	71	71	74.484	0	323.31	103760000000	663	Q86T24	Q86T24	20.6145	20.9479	21.3883	30.1935	29.9532	29.8453	32.4196	32.4878	32.5151	22.8672	24.234	22.0292	31.4682	31.1761
sp|P78347-2|GTF2I_HUMAN Isoform 2 of General transcription factor II-I OS=Homo sapiens OX=9606 GN=GTF2I;sp|P78347-4|GTF2I_HUMAN Isoform 4 of General transcription factor II-I OS=Homo sapiens OX=9606 GN=GTF2I;sp|P78347-3|GTF2I_HUMAN Isoform 3 of General tra	General transcription factor II-I	GTF2I	+	3.51684	0.000941176	8.99673	+	+	4.02689	0	11.1139	+	+	2.05515	0.0148609	6.94897	+	+	5.0541	0	9.80049	+	72	72	69	65.6	65.6	64.3	107.97	0	323.31	182140000000	1344	P78347-2;P78347-4;P78347-3;P78347;A0A494C1K3;A0A494C0Q7;P78347-5;C9J6M0;A0A087WW90;A0A0D9SF80;Q86UP8-3	P78347-2;P78347-4;P78347-3;P78347;A0A494C1K3	23.1898	22.8097	21.1535	32.2078	31.261	30.6745	33.4977	32.9382	34.0588	22.8034	23.7198	23.0234	32.47	30.3837
sp|P29374-3|ARI4A_HUMAN Isoform III of AT-rich interactive domain-containing protein 4A OS=Homo sapiens OX=9606 GN=ARID4A;sp|P29374-2|ARI4A_HUMAN Isoform II of AT-rich interactive domain-containing protein 4A OS=Homo sapiens OX=9606 GN=ARID4A;sp|P29374|ARI	AT-rich interactive domain-containing protein 4A	ARID4A	+	3.97106	0	8.89504	+	+	3.7066	0.000791946	8.31056	+	+	1.63127	0.0301844	5.41692	+	+	1.51997	0.00233046	4.42873	+	41	41	40	41.2	41.2	40.4	134.95	0	323.31	10885000000	421	P29374-3;P29374-2;P29374;H7C485;C9J1W3;F8WAR5;C9JIF4	P29374-3;P29374-2;P29374;H7C485	22.2867	22.042	20.4324	30.5178	30.4467	30.4816	29.7739	29.5323	30.3866	21.7395	26.0055	22.2563	29.5489	29.3558
sp|Q6NZI2|CAVN1_HUMAN Caveolae-associated protein 1 OS=Homo sapiens OX=9606 GN=CAVIN1 PE=1 SV=1;sp|Q6NZI2-2|CAVN1_HUMAN Isoform 2 of Caveolae-associated protein 1 OS=Homo sapiens OX=9606 GN=CAVIN1	Polymerase I and transcript release factor	PTRF	+	4.00607	0	8.78907	+	+	3.76659	0.000830986	7.62331	+		0.983698	0.100129	6.63122		+	4.90151	0	9.80925	+	21	21	21	41.8	41.8	41.8	43.476	0	323.31	91953000000	371	Q6NZI2;Q6NZI2-2;Q6NZI2-3	Q6NZI2;Q6NZI2-2	21.451	20.0771	21.949	29.8284	30.0483	29.9676	28.8416	28.6789	28.8264	22.9818	21.8348	22.9046	32.4769	32.2074
tr|A0A087WVA1|A0A087WVA1_HUMAN Selenoprotein T OS=Homo sapiens OX=9606 GN=SELENOT PE=1 SV=1;sp|P62341|SELT_HUMAN Thioredoxin reductase-like selenoprotein T OS=Homo sapiens OX=9606 GN=SELENOT PE=1 SV=2;tr|F8WBD0|F8WBD0_HUMAN Selenoprotein T OS=Homo sapiens	Selenoprotein T	SELT		NaN	1	0			NaN	1	0			0.250173	0.703442	0.504981		+	1.36729	0.00427759	-2.79704		2	2	2	15.9	15.9	15.9	22.344	0	27.134	640280000	4	A0A087WVA1;P62341;F8WBD0;Q6IAK0	A0A087WVA1;P62341;F8WBD0;Q6IAK0	22.4827	22.0324	21.8758	20.6308	21.097	20.9191	22.9567	22.9712	21.2951	25.5398	25.6721	25.5062	24.9585	25.6511
sp|Q8NAP3|ZBT38_HUMAN Zinc finger and BTB domain-containing protein 38 OS=Homo sapiens OX=9606 GN=ZBTB38 PE=1 SV=2;tr|D6RBC4|D6RBC4_HUMAN Zinc finger and BTB domain-containing protein 38 (Fragment) OS=Homo sapiens OX=9606 GN=ZBTB38 PE=1 SV=1;tr|A0A1B0GV48|	Zinc finger and BTB domain-containing protein 38	ZBTB38	+	4.29684	0	8.70142	+	+	4.34912	0	9.3909	+	+	3.01111	0.0175484	6.73946	+	+	4.01402	0	6.85342	+	59	59	58	55.1	55.1	54.5	134.26	0	323.31	49033000000	785	Q8NAP3;D6RBC4;A0A1B0GV48;D6R9I1;D6RJE1;D6RE69;D6RHD1;D6RGK1;D6R9U6;D6RC86;D6RAC4;D6R9J6	Q8NAP3;D6RBC4;A0A1B0GV48	22.1323	23.7214	22.9928	31.8162	31.6763	31.4583	32.1525	32.1684	32.6982	23.5648	22.1553	22.6517	30.4808	29.8449
sp|Q14517|FAT1_HUMAN Protocadherin Fat 1 OS=Homo sapiens OX=9606 GN=FAT1 PE=1 SV=2;tr|A0A087WVP1|A0A087WVP1_HUMAN Protocadherin Fat 1 OS=Homo sapiens OX=9606 GN=FAT1 PE=1 SV=1	Protocadherin Fat 1;Protocadherin Fat 1, nuclear form	FAT1		NaN	1	0			0.379006	0.327274	0.880772			0.00113454	0.99744	0.00456174		+	2.51451	0.000235798	-2.68501		34	34	34	12.9	12.9	12.9	506.27	0	245.39	1836800000	103	Q14517;A0A087WVP1;D6RCE4	Q14517;A0A087WVP1	22.0618	21.9343	22.1675	22.0165	21.5346	21.8557	21.1168	24.4474	23.2417	27.1484	27.3876	26.7372	25.6616	25.9395
sp|O15446|RPA34_HUMAN DNA-directed RNA polymerase I subunit RPA34 OS=Homo sapiens OX=9606 GN=POLR1G PE=1 SV=1;sp|O15446-2|RPA34_HUMAN Isoform 2 of DNA-directed RNA polymerase I subunit RPA34 OS=Homo sapiens OX=9606 GN=POLR1G	DNA-directed RNA polymerase I subunit RPA34	CD3EAP	+	3.88089	0	8.56993	+	+	3.3194	0.00101739	6.31159	+	+	3.12858	0.0161538	7.50704	+	+	6.77971	0	7.17985	+	25	25	25	71	71	71	54.985	0	323.31	10999000000	234	O15446;O15446-2	O15446;O15446-2	21.431	21.193	23.0592	30.447	30.3463	30.5997	27.92	28.437	28.261	21.6961	21.3992	21.5066	29.9096	29.7756
sp|Q8N1G0|ZN687_HUMAN Zinc finger protein 687 OS=Homo sapiens OX=9606 GN=ZNF687 PE=1 SV=1;sp|Q8N1G0-2|ZN687_HUMAN Isoform 2 of Zinc finger protein 687 OS=Homo sapiens OX=9606 GN=ZNF687;tr|F8WCX2|F8WCX2_HUMAN Zinc finger protein 687 OS=Homo sapiens OX=9606	Zinc finger protein 687	ZNF687	+	4.05163	0	8.56237	+	+	3.85408	0.000501961	7.58676	+	+	3.16834	0.0164	8.56435	+	+	5.8544	0	8.66671	+	51	51	50	56.8	56.8	56.1	129.53	0	323.31	93091000000	927	Q8N1G0;Q8N1G0-2;F8WCX2;H0Y5I5;A6PVV7;A2A3Q2	Q8N1G0;Q8N1G0-2;F8WCX2;H0Y5I5	24.5604	24.4234	26.0232	33.7639	33.6675	33.2626	32.4579	32.4349	32.8744	22.9646	22.9024	22.3935	32.2464	32.1502
sp|P29590|PML_HUMAN Protein PML OS=Homo sapiens OX=9606 GN=PML PE=1 SV=3	Protein PML	PML	+	4.3152	0	8.18259	+	+	4.63137	0	9.57894	+	+	5.01562	0.0426667	11.3693	+	+	4.96444	0	10.8352	+	55	55	0	70.3	70.3	0	97.55	0	323.31	201880000000	1073	P29590;H3BT29;H3BVD2	P29590	24.5824	24.1386	23.1461	32.31	32.1661	31.9387	33.5382	33.4555	33.6102	22.1588	22.2625	21.0336	33.2478	32.9945
tr|S4R3H4|S4R3H4_HUMAN Apoptotic chromatin condensation inducer in the nucleus OS=Homo sapiens OX=9606 GN=ACIN1 PE=1 SV=1;tr|E7EQT4|E7EQT4_HUMAN Apoptotic chromatin condensation inducer in the nucleus OS=Homo sapiens OX=9606 GN=ACIN1 PE=1 SV=2;sp|Q9UKV3|AC	Apoptotic chromatin condensation inducer in the nucleus	ACIN1	+	6.49572	0	8.08327	+	+	4.64464	0	6.04522	+	+	1.88729	0.0194286	7.02412	+	+	3.31482	0	5.49467	+	40	40	40	36.7	36.7	36.7	145.44	0	323.31	21189000000	474	S4R3H4;E7EQT4;Q9UKV3;Q9UKV3-5;Q9UKV3-3;Q9UKV3-2;G3V3B0;G3V3T3;A0A087WYN3	S4R3H4;E7EQT4;Q9UKV3;Q9UKV3-5	22.6415	22.9609	22.6123	30.791	30.7521	30.9214	28.83	28.3413	29.179	21.9079	23.5814	23.3627	31.6606	31.4043
tr|A0A087WWP8|A0A087WWP8_HUMAN Lysine-specific demethylase 9 OS=Homo sapiens OX=9606 GN=RSBN1 PE=1 SV=1;sp|Q5VWQ0|RSBN1_HUMAN Lysine-specific demethylase 9 OS=Homo sapiens OX=9606 GN=RSBN1 PE=1 SV=2;tr|A0A0C4DGT8|A0A0C4DGT8_HUMAN Lysine-specific demethylas	Round spermatid basic protein 1	RSBN1		0.65651	0.342607	-0.291811		+	1.57092	0.0118703	-0.682858		+	2.19443	0.0266863	0.997895		+	2.70193	0.00574065	0.367874	+	26	26	24	40.7	40.7	38.1	84.975	0	174.91	5452800000	177	A0A087WWP8;Q5VWQ0;A0A0C4DGT8;A0A0C4DH79;Q5VWQ0-4	A0A087WWP8;Q5VWQ0;A0A0C4DGT8	27.9151	28.2038	28.5519	27.893	28.0876	27.8147	27.402	27.671	27.5491	26.9655	26.9416	26.8706	28.2607	27.9026
tr|A9Z1X7|A9Z1X7_HUMAN Serine/arginine repetitive matrix protein 1 OS=Homo sapiens OX=9606 GN=SRRM1 PE=1 SV=1;sp|Q8IYB3-2|SRRM1_HUMAN Isoform 2 of Serine/arginine repetitive matrix protein 1 OS=Homo sapiens OX=9606 GN=SRRM1;sp|Q8IYB3|SRRM1_HUMAN Serine/arg	Serine/arginine repetitive matrix protein 1	SRRM1	+	5.38521	0	8.05403	+	+	4.69386	0	4.67547	+	+	2.08704	0.0150355	7.31007	+	+	4.34366	0	6.01174	+	18	18	18	22	22	22	103.39	0	323.31	20441000000	289	A9Z1X7;Q8IYB3-2;Q8IYB3;E9PCT1;M0R088;M0R1E7;M0QXG5	A9Z1X7;Q8IYB3-2;Q8IYB3;E9PCT1;M0R088	22.4702	22.4692	22.2152	30.7653	30.0304	30.521	27.4044	26.7843	26.9924	23.1181	23.1113	22.5564	31.332	32.0883
tr|A0A087WXB0|A0A087WXB0_HUMAN Secretory carrier-associated membrane protein OS=Homo sapiens OX=9606 GN=SCAMP1 PE=1 SV=1;sp|O15126|SCAM1_HUMAN Secretory carrier-associated membrane protein 1 OS=Homo sapiens OX=9606 GN=SCAMP1 PE=1 SV=2;tr|A0A087WTX8|A0A087W	Secretory carrier-associated membrane protein 1	SCAMP1		NaN	1	0			0.590707	0.10589	1.41804			1.39969	0.0940612	-0.695754		+	3.78843	0	-2.32503		4	4	4	23.4	23.4	23.4	35.046	0	26.473	413090000	13	A0A087WXB0;O15126;A0A087WTX8;A0A087WZA6;A0A087WU14;O15126-2	A0A087WXB0;O15126;A0A087WTX8;A0A087WZA6;A0A087WU14;O15126-2	22.2621	22.1788	21.2977	21.1913	21.7675	21.8332	25.249	21.7351	23.0086	24.2446	24.423	24.5237	23.2778	23.9943
tr|A0A087WXI5|A0A087WXI5_HUMAN Cadherin-1 OS=Homo sapiens OX=9606 GN=CDH1 PE=1 SV=1;sp|P12830|CADH1_HUMAN Cadherin-1 OS=Homo sapiens OX=9606 GN=CDH1 PE=1 SV=3;sp|P12830-2|CADH1_HUMAN Isoform 2 of Cadherin-1 OS=Homo sapiens OX=9606 GN=CDH1;tr|A0A087WX17|A0A	Cadherin-1;E-Cad/CTF1;E-Cad/CTF2;E-Cad/CTF3	CDH1		NaN	1	0			NaN	1	0			0.278334	0.632542	1.79518		+	1.29204	0.00955673	-0.939222		13	13	13	20.3	20.3	20.3	100.03	0	165.16	810870000	21	A0A087WXI5;P12830;P12830-2;A0A087WX17;A0A087WU43;H3BNC6;H3BVI7;J3QKP1	A0A087WXI5;P12830;P12830-2;A0A087WX17;A0A087WU43	22.5384	22.7016	20.5091	23.1721	22.0533	22.1032	22.6653	21.5906	21.1282	22.6419	22.6544	22.7332	21.846	21.9119
sp|Q53GS9|SNUT2_HUMAN U4/U6.U5 tri-snRNP-associated protein 2 OS=Homo sapiens OX=9606 GN=USP39 PE=1 SV=2;tr|B9A018|B9A018_HUMAN U4/U6.U5 tri-snRNP-associated protein 2 OS=Homo sapiens OX=9606 GN=USP39 PE=1 SV=1;tr|A0A087X1B2|A0A087X1B2_HUMAN U4/U6.U5 tri-s	U4/U6.U5 tri-snRNP-associated protein 2	USP39	+	4.83359	0	7.95992	+	+	4.81135	0	8.47389	+	+	1.59155	0.0356805	3.94073	+	+	5.25592	0	3.19189	+	31	31	31	60.7	60.7	60.7	65.38	0	323.31	33360000000	429	Q53GS9;B9A018;A0A087X1B2;Q53GS9-3;Q53GS9-2;F8WC91;C9JIU2;A0A087WW31;C9J0X5	Q53GS9;B9A018;A0A087X1B2;Q53GS9-3;Q53GS9-2	21.3593	21.5896	20.5801	29.2938	29.0411	29.0739	29.7436	29.3566	29.8505	26.9892	26.914	26.8654	32.0787	31.9176
sp|Q6UXV4|MIC27_HUMAN MICOS complex subunit MIC27 OS=Homo sapiens OX=9606 GN=APOOL PE=1 SV=1;tr|A0A087WYF7|A0A087WYF7_HUMAN MICOS complex subunit OS=Homo sapiens OX=9606 GN=APOOL PE=1 SV=1;tr|A0A087WUX8|A0A087WUX8_HUMAN MICOS complex subunit OS=Homo sapien	MICOS complex subunit MIC27	APOOL		NaN	1	0			NaN	1	0			2.10892	0.0742901	-0.422062		+	2.76061	0	-3.04428		5	5	5	28.4	28.4	28.4	29.159	0	16.209	237370000	11	Q6UXV4;A0A087WYF7;A0A087WUX8	Q6UXV4;A0A087WYF7;A0A087WUX8	21.5679	21.9323	21.8711	22.1354	21.6936	21.2921	23.0835	22.4228	20.6269	24.9242	24.654	24.8846	24.4085	24.3721
sp|P52272|HNRPM_HUMAN Heterogeneous nuclear ribonucleoprotein M OS=Homo sapiens OX=9606 GN=HNRNPM PE=1 SV=3;sp|P52272-2|HNRPM_HUMAN Isoform 2 of Heterogeneous nuclear ribonucleoprotein M OS=Homo sapiens OX=9606 GN=HNRNPM;tr|A0A087X0X3|A0A087X0X3_HUMAN Hete	Heterogeneous nuclear ribonucleoprotein M	HNRNPM	+	2.92674	0.00284091	7.94549	+	+	3.43696	0.000924731	10.7375	+	+	2.83912	0.0167	7.3228	+	+	6.203	0	9.26602	+	60	60	13	81.1	81.1	19.9	77.515	0	323.31	784320000000	2720	P52272;P52272-2;A0A087X0X3;M0R2T0;M0R2I7;M0QY96;M0QYL3	P52272;P52272-2;A0A087X0X3;M0R2T0	26.8123	23.683	26.2192	33.545	33.6678	33.3382	36.362	36.3679	36.197	24.7876	24.6485	25.1908	33.1694	33.0727
tr|G3V4C1|G3V4C1_HUMAN Heterogeneous nuclear ribonucleoproteins C1/C2 OS=Homo sapiens OX=9606 GN=HNRNPC PE=1 SV=1;sp|P07910-2|HNRPC_HUMAN Isoform C1 of Heterogeneous nuclear ribonucleoproteins C1/C2 OS=Homo sapiens OX=9606 GN=HNRNPC;tr|B2R5W2|B2R5W2_HUMAN	Heterogeneous nuclear ribonucleoproteins C1/C2	HNRNPC	+	4.8913	0	7.83729	+	+	4.55856	0	6.32197	+	+	2.71519	0.0144151	8.08312	+	+	3.81909	0	7.66313	+	25	25	2	59.2	59.2	8.2	32.238	0	323.31	111530000000	626	G3V4C1;P07910-2;B2R5W2;G3V4W0;B4DY08;P07910-4;G3V2D6;G3V251;G3V5X6;G3V3K6;B4DSU6	G3V4C1;P07910-2;B2R5W2;G3V4W0;B4DY08;P07910-4;G3V2D6	26.8368	26.2479	25.8518	33.994	34.1425	34.3119	32.7066	32.4999	32.6959	23.6083	24.6313	22.82	32.714	32.7944
sp|Q7Z6E9|RBBP6_HUMAN E3 ubiquitin-protein ligase RBBP6 OS=Homo sapiens OX=9606 GN=RBBP6 PE=1 SV=1;tr|A0A2R8Y880|A0A2R8Y880_HUMAN E3 ubiquitin-protein ligase RBBP6 (Fragment) OS=Homo sapiens OX=9606 GN=RBBP6 PE=1 SV=1;sp|Q7Z6E9-2|RBBP6_HUMAN Isoform 2 of E	E3 ubiquitin-protein ligase RBBP6	RBBP6	+	4.93603	0	7.80439	+	+	2.41183	0.00141675	2.50332	+	+	2.18068	0.0150794	6.82455	+	+	4.70308	0	4.9065	+	53	53	53	33.8	33.8	33.8	201.56	0	323.31	19284000000	429	Q7Z6E9;A0A2R8Y880;Q7Z6E9-2;Q7Z6E9-4;H3BSK8;H3BUN0;I3L3Y2;A0A087WY32;Q7Z6E9-3	Q7Z6E9;A0A2R8Y880;Q7Z6E9-2;Q7Z6E9-4;H3BSK8	24.1732	23.8165	23.2447	31.7508	31.3758	31.5209	26.8407	26.1489	25.7547	24.0127	23.5965	23.3117	31.4537	32.055
sp|Q9P1Z0|ZBTB4_HUMAN Zinc finger and BTB domain-containing protein 4 OS=Homo sapiens OX=9606 GN=ZBTB4 PE=1 SV=3	Zinc finger and BTB domain-containing protein 4	ZBTB4	+	5.54564	0	7.79376	+	+	5.92503	0	7.9589	+	+	3.21275	0.0182609	5.82791	+	+	3.66187	0	6.14878	+	26	25	25	35.6	34.8	34.8	105.11	0	323.31	16663000000	298	Q9P1Z0	Q9P1Z0	22.2425	22.6309	22.7083	30.6098	30.2071	30.146	30.4187	30.3821	30.6576	22.5076	22.174	23.7528	29.0808	28.8949
tr|H0YCW6|H0YCW6_HUMAN Mannosyltransferase (Fragment) OS=Homo sapiens OX=9606 GN=ALG9 PE=3 SV=1;tr|A0A087WZ62|A0A087WZ62_HUMAN Mannosyltransferase OS=Homo sapiens OX=9606 PE=3 SV=1;sp|Q9H6U8-2|ALG9_HUMAN Isoform 2 of Alpha-1,2-mannosyltransferase ALG9 OS=H	Alpha-1,2-mannosyltransferase ALG9	ALG9		NaN	1	0			NaN	1	0			1.01177	0.111477	-2.0089		+	0.953374	0.0177641	-1.8181		5	5	5	36.2	36.2	36.2	24.198	0	12.856	275310000	11	H0YCW6;A0A087WZ62;Q9H6U8-2;Q9H6U8-4;Q9H6U8;Q9H6U8-3	H0YCW6;A0A087WZ62;Q9H6U8-2;Q9H6U8-4;Q9H6U8;Q9H6U8-3	21.971	20.69	21.939	22.1753	22.0708	22.6341	22.2679	23.7168	22.2319	24.5232	24.1869	24.8116	24.2541	21.179
sp|Q5QJE6|TDIF2_HUMAN Deoxynucleotidyltransferase terminal-interacting protein 2 OS=Homo sapiens OX=9606 GN=DNTTIP2 PE=1 SV=2;tr|J3KP30|J3KP30_HUMAN Deoxynucleotidyltransferase terminal-interacting protein 2 OS=Homo sapiens OX=9606 GN=DNTTIP2 PE=1 SV=1	Deoxynucleotidyltransferase terminal-interacting protein 2	DNTTIP2	+	5.55153	0	7.654	+	+	5.81532	0	9.04268	+	+	2.96573	0.016	6.10972	+	+	6.56769	0	8.73352	+	30	30	30	50.9	50.9	50.9	84.468	0	323.31	37911000000	400	Q5QJE6;J3KP30;E9PRB3	Q5QJE6;J3KP30	22.3849	22.7883	22.1553	29.9613	30.101	30.2283	31.3529	31.6425	31.4611	21.8771	21.8801	21.4968	28.6782	28.4649
sp|Q4LE39|ARI4B_HUMAN AT-rich interactive domain-containing protein 4B OS=Homo sapiens OX=9606 GN=ARID4B PE=1 SV=2;sp|Q4LE39-2|ARI4B_HUMAN Isoform 2 of AT-rich interactive domain-containing protein 4B OS=Homo sapiens OX=9606 GN=ARID4B;sp|Q4LE39-3|ARI4B_HUM	AT-rich interactive domain-containing protein 4B	ARID4B	+	5.20699	0	7.54245	+	+	4.75875	0	6.79345	+	+	2.48922	0.0142051	6.62631	+	+	3.67691	0	6.39351	+	32	31	31	29.9	29.1	29.1	147.81	0	323.31	8349700000	266	Q4LE39;Q4LE39-2;Q4LE39-3;X6RCR8;Q4LE39-4;H7C5R6;H0Y7Y8	Q4LE39;Q4LE39-2;Q4LE39-3;X6RCR8;Q4LE39-4	22.3161	21.7582	22.5313	29.634	29.723	29.8759	28.9458	28.7439	29.2962	21.8598	22.136	20.538	29.0747	29.058
sp|Q9Y2K1|ZBTB1_HUMAN Zinc finger and BTB domain-containing protein 1 OS=Homo sapiens OX=9606 GN=ZBTB1 PE=1 SV=3	Zinc finger and BTB domain-containing protein 1	ZBTB1	+	3.32636	0.000711111	7.48017	+	+	3.32168	0.00104232	7.11135	+	+	2.38971	0.0145934	7.26643	+	+	4.04306	0	7.58107	+	34	34	1	51.3	51.3	1.8	82.015	0	323.31	19038000000	265	Q9Y2K1;G3V447;G3V2I8;G3V3N0	Q9Y2K1	20.1937	22.5407	21.5236	29.22	28.4724	29.0061	28.4356	28.537	28.6194	22.2971	22.7033	21.1618	30.6681	30.2338
sp|Q13427|PPIG_HUMAN Peptidyl-prolyl cis-trans isomerase G OS=Homo sapiens OX=9606 GN=PPIG PE=1 SV=2;tr|E9PG73|E9PG73_HUMAN Peptidyl-prolyl cis-trans isomerase G OS=Homo sapiens OX=9606 GN=PPIG PE=1 SV=1;tr|C9JM79|C9JM79_HUMAN Peptidyl-prolyl cis-trans iso	Peptidyl-prolyl cis-trans isomerase G;Peptidyl-prolyl cis-trans isomerase	PPIG	+	5.04927	0	7.4465	+	+	3.29524	0.00115266	3.09353	+	+	1.58779	0.0335518	6.15854	+	+	1.69717	0.00153683	4.00557	+	16	16	16	24	24	24	88.616	0	293.76	12235000000	175	Q13427;E9PG73;C9JM79;Q13427-2;C9JN15;C9JT64;C9J679	Q13427;E9PG73;C9JM79;Q13427-2;C9JN15	22.5467	23.2328	23.1645	30.6881	30.3982	30.1972	26.4318	25.7126	26.0801	21.7997	25.1594	23.354	31.1277	31.0491
sp|Q14978-2|NOLC1_HUMAN Isoform Beta of Nucleolar and coiled-body phosphoprotein 1 OS=Homo sapiens OX=9606 GN=NOLC1;tr|A0A0A0MRM9|A0A0A0MRM9_HUMAN Nucleolar and coiled-body phosphoprotein 1 (Fragment) OS=Homo sapiens OX=9606 GN=NOLC1 PE=1 SV=1;sp|Q14978|NO	Nucleolar and coiled-body phosphoprotein 1	NOLC1	+	4.53255	0	7.44587	+	+	3.064	0.00106122	2.49829	+	+	2.68527	0.0134035	7.42959	+	+	3.88959	0	7.18728	+	21	21	2	26.4	26.4	4.4	74.746	0	323.31	17961000000	180	Q14978-2;A0A0A0MRM9;Q14978;S4R349;S4R402;S4R3C2	Q14978-2;A0A0A0MRM9;Q14978	22.6085	23.2737	23.4782	30.2224	30.4635	31.012	25.4398	25.764	25.6515	22.326	23.0195	21.7988	30.798	30.7897
sp|Q96RL1|UIMC1_HUMAN BRCA1-A complex subunit RAP80 OS=Homo sapiens OX=9606 GN=UIMC1 PE=1 SV=2;sp|Q96RL1-3|UIMC1_HUMAN Isoform 3 of BRCA1-A complex subunit RAP80 OS=Homo sapiens OX=9606 GN=UIMC1;sp|Q96RL1-2|UIMC1_HUMAN Isoform 2 of BRCA1-A complex subunit	BRCA1-A complex subunit RAP80	UIMC1	+	4.08904	0	7.42079	+	+	5.00331	0	9.31333	+	+	3.17314	0.0194286	4.66709	+	+	4.30896	0	8.00114	+	35	35	35	64.5	64.5	64.5	79.727	0	323.31	31205000000	413	Q96RL1;Q96RL1-3;Q96RL1-2;Q96RL1-4;D6RC40;D6RCQ3;Q96RL1-5;D6RDZ5;D6R9M3	Q96RL1;Q96RL1-3;Q96RL1-2	22.1165	21.184	22.2469	29.0306	28.9025	29.8767	31.1675	31.1557	31.1642	21.5908	22.1283	23.0611	27.1595	27.1608
tr|B4DWF2|B4DWF2_HUMAN Zinc finger protein Helios OS=Homo sapiens OX=9606 GN=IKZF2 PE=1 SV=1;sp|Q9UKS7|IKZF2_HUMAN Zinc finger protein Helios OS=Homo sapiens OX=9606 GN=IKZF2 PE=1 SV=2	Zinc finger protein Helios	ZNFN1A2;IKZF2	+	3.27157	0.00139726	6.11799	+	+	3.89155	0.000540084	8.23954	+		0.250038	0.692431	0.674444			0.0960494	0.881359	0.264212		15	15	3	41.5	41.5	10.3	60.26	0	248.14	8865600000	127	B4DWF2;Q9UKS7;Q9UKS7-6;Q9UKS7-3;F8VPL6;Q9H2S9-2;Q9H2S9	B4DWF2;Q9UKS7	21.4051	22.7079	23.2623	28.4519	29.0562	28.2213	30.4597	30.7442	30.89	23.1094	22.0461	21.377	21.6958	22.141
tr|A0A087X1U4|A0A087X1U4_HUMAN Methyl-CpG-binding protein 2 OS=Homo sapiens OX=9606 GN=MECP2 PE=1 SV=1;tr|I6LM39|I6LM39_HUMAN Methyl-CpG-binding protein 2 OS=Homo sapiens OX=9606 GN=MECP2 PE=1 SV=1;tr|A0A087WVW7|A0A087WVW7_HUMAN Methyl-CpG-binding protein		MECP2	+	1.99543	0.0307115	-0.725864		+	3.64467	0.00122852	-2.16096			0.21962	0.74823	-0.315421		+	1.36685	0.00391357	-4.45519		31	1	1	59.6	2.5	2.5	34.897	0.0071331	2.2237	4933500000	57	A0A087X1U4;I6LM39;A0A087WVW7;A0A0D9SFX7;A0A0D9SEX1;C9JH89	A0A087X1U4;I6LM39;A0A087WVW7;A0A0D9SFX7	28.6903	29.0235	28.9714	28.0792	28.406	28.0223	26.995	26.6724	26.5349	28.141	28.1945	27.7071	26.9785	27.3669
tr|A0A087X256|A0A087X256_HUMAN WASH complex subunit 4 OS=Homo sapiens OX=9606 GN=WASHC4 PE=1 SV=1;sp|Q2M389|WASC4_HUMAN WASH complex subunit 4 OS=Homo sapiens OX=9606 GN=WASHC4 PE=1 SV=2;sp|Q2M389-2|WASC4_HUMAN Isoform 2 of WASH complex subunit 4 OS=Homo s	WASH complex subunit 7	KIAA1033		NaN	1	0			0.0628772	0.923136	0.175582			1.32072	0.0685844	-1.4603		+	1.04544	0.0372138	-0.487349		12	12	12	13.7	13.7	13.7	136.5	0	43.191	726040000	31	A0A087X256;Q2M389;Q2M389-2;F8W1W1;F8VYH7	A0A087X256;Q2M389;Q2M389-2	22.0125	22.75	23.3804	21.566	22.1272	20.3696	24.6362	22.2794	21.754	25.623	25.4355	26.0204	24.6316	24.8047
sp|Q6PJT7-2|ZC3HE_HUMAN Isoform 2 of Zinc finger CCCH domain-containing protein 14 OS=Homo sapiens OX=9606 GN=ZC3H14;sp|Q6PJT7-3|ZC3HE_HUMAN Isoform 3 of Zinc finger CCCH domain-containing protein 14 OS=Homo sapiens OX=9606 GN=ZC3H14;tr|H0YJA2|H0YJA2_HUMAN	Zinc finger CCCH domain-containing protein 14	ZC3H14	+	3.68589	0.00105495	7.3789	+	+	3.56074	0.000947658	6.72833	+	+	2.20654	0.0144068	7.46822	+	+	5.30657	0	7.43931	+	36	36	0	64.9	64.9	0	82.804	0	323.31	18364000000	404	Q6PJT7-2;Q6PJT7-3;H0YJA2	Q6PJT7-2;Q6PJT7-3;H0YJA2	21.6764	23.3145	22.9126	30.5874	29.7035	29.7494	28.8905	29.3882	29.8098	21.6793	21.7439	22.17	30.7828	30.6999
sp|Q5T200|ZC3HD_HUMAN Zinc finger CCCH domain-containing protein 13 OS=Homo sapiens OX=9606 GN=ZC3H13 PE=1 SV=1	Zinc finger CCCH domain-containing protein 13	ZC3H13	+	5.81474	0	7.33442	+	+	3.66431	0.00110377	3.66064	+	+	1.89216	0.01952	5.90643	+	+	3.96868	0	4.88442	+	37	37	4	24.1	24.1	2.9	196.63	0	323.31	5368200000	187	Q5T200;Q5T9K0;A0A087WX14	Q5T200	22.5088	22.1868	22.6445	29.8866	29.8627	29.5939	26.49	25.6307	26.2012	21.8445	22.5628	22.3948	29.2536	29.7995
tr|A0A087X2F1|A0A087X2F1_HUMAN Zinc finger and SCAN domain-containing protein 26 OS=Homo sapiens OX=9606 GN=ZSCAN26 PE=1 SV=1		ZSCAN26		1.02823	0.12012	-0.695957			0.314872	0.639429	-0.192688			0.706779	0.295281	-0.640713			0.671347	0.184846	-0.279883		14	14	1	48	48	3.2	39.697	0	52.274	5350800000	157	A0A087X2F1;A0A087WXM4	A0A087X2F1	27.5207	28.042	28.2925	27.3635	27.5751	26.8287	27.5546	27.901	27.8215	27.8116	27.6063	27.9812	26.9	26.6342
sp|Q9UQ35|SRRM2_HUMAN Serine/arginine repetitive matrix protein 2 OS=Homo sapiens OX=9606 GN=SRRM2 PE=1 SV=2;sp|Q9UQ35-2|SRRM2_HUMAN Isoform 2 of Serine/arginine repetitive matrix protein 2 OS=Homo sapiens OX=9606 GN=SRRM2	Serine/arginine repetitive matrix protein 2	SRRM2	+	3.53024	0.000888889	7.27474	+	+	1.32018	0.00993095	1.69818	+	+	2.43854	0.0127792	10.1326	+	+	5.27606	0	8.79677	+	57	57	57	27	27	27	299.61	0	323.31	84905000000	782	Q9UQ35;Q9UQ35-2;I3L4D8;I3L182;I3L1I8;Q9UQ35-3;I3L1C0;A0A087X1W1;I3L0N7;I3L3Q8;I3L4U6	Q9UQ35;Q9UQ35-2	25.3035	26.5702	24.5407	33.0387	32.4425	32.7575	27.3894	27.0261	27.0935	22.5966	21.8326	22.0093	33.9303	33.9143
tr|A0A494C0S2|A0A494C0S2_HUMAN DNA repair protein-complementing XP-G cells OS=Homo sapiens OX=9606 GN=ERCC5 PE=1 SV=1;tr|A0A090HNM7|A0A090HNM7_HUMAN DNA repair protein-complementing XP-G cells OS=Homo sapiens OX=9606 GN=ERCC5 PE=1 SV=1;tr|A0A1W2PS85|A0A1W2	DNA repair protein complementing XP-G cells	ERCC5-201;BIVM-ERCC5;ERCC5		NaN	1	0			NaN	1	0			NaN	1	0			0.345756	0.454741	0.388604		2	2	2	3.1	3.1	3.1	101.35	0	6.9742	131160000	4	A0A494C0S2;A0A090HNM7;A0A1W2PS85;R4GMW8;P28715	A0A494C0S2;A0A090HNM7;A0A1W2PS85;R4GMW8;P28715	22.0737	21.0516	21.5374	21.3189	23.1789	22.6559	21.8188	21.7583	22.1151	22.179	23.7108	22.6772	22.0983	22.1486
tr|A0A096LNT6|A0A096LNT6_HUMAN Guided entry of tail-anchored proteins factor 1 OS=Homo sapiens OX=9606 GN=GET1 PE=3 SV=1;tr|A0A3B3IUG4|A0A3B3IUG4_HUMAN Guided entry of tail-anchored proteins factor 1 (Fragment) OS=Homo sapiens OX=9606 GN=GET1 PE=3 SV=1;tr|	Tail-anchored protein insertion receptor WRB	WRB		NaN	1	0			0.697677	0.133882	-0.418391		+	1.62719	0.0508137	-1.10786			0.72873	0.0698534	-0.702185		2	2	2	33.3	33.3	33.3	8.0982	0	17.035	122740000	10	A0A096LNT6;A0A3B3IUG4;B4DLW3;H7BYE5;A0A3B3ISA8;H7C384;B7Z1T1;A0A3B3ISE9;A0A3B3ITX9;O00258-2;O00258;C9JLV3	A0A096LNT6;A0A3B3IUG4;B4DLW3;H7BYE5;A0A3B3ISA8;H7C384;B7Z1T1;A0A3B3ISE9;A0A3B3ITX9;O00258-2;O00258;C9JLV3	22.1535	22.695	22.0433	21.7178	23.5193	22.6148	21.7169	21.6721	22.2476	23.4243	23.0614	23.7612	21.9363	22.2393
sp|Q8IWI9|MGAP_HUMAN MAX gene-associated protein OS=Homo sapiens OX=9606 GN=MGA PE=1 SV=4;tr|H3BTF4|H3BTF4_HUMAN MAX gene-associated protein (Fragment) OS=Homo sapiens OX=9606 GN=MGA PE=1 SV=1;tr|H3BP52|H3BP52_HUMAN MAX gene-associated protein (Fragment) O	MAX gene-associated protein	MGA	+	4.56307	0	7.23081	+	+	5.89314	0	8.05048	+		1.072	0.0847378	4.56635		+	2.35181	0.000239913	6.58478	+	89	89	0	41	41	0	336.16	0	323.31	29562000000	652	Q8IWI9;H3BTF4;H3BP52;H3BTN2	Q8IWI9;H3BTF4;H3BP52	22.2589	22.7454	22.7922	30.4027	29.4818	29.6045	30.5947	30.6982	30.6551	25.5065	21.5662	23.4644	29.9542	29.4872
sp|P27816-6|MAP4_HUMAN Isoform 6 of Microtubule-associated protein 4 OS=Homo sapiens OX=9606 GN=MAP4;sp|P27816|MAP4_HUMAN Microtubule-associated protein 4 OS=Homo sapiens OX=9606 GN=MAP4 PE=1 SV=3;tr|E7EVA0|E7EVA0_HUMAN Microtubule-associated protein OS=Ho	Microtubule-associated protein 4;Microtubule-associated protein	MAP4	+	5.62451	0	7.2298	+	+	3.54213	0.000993631	3.31436	+		1.01758	0.0983699	3.7589		+	3.0757	0	2.9817	+	26	26	26	36.6	36.6	36.6	119.96	0	48.243	2001300000	86	P27816-6;P27816;E7EVA0;P27816-2;P27816-5;P27816-4;B5MEG9;H7C4C5;H0Y2V1;F8W9U4;H7C456;A0A0J9YVV8;A0A0J9YW37;P27816-7;P27816-3	P27816-6;P27816;E7EVA0;P27816-2	21.5882	21.8683	21.8366	28.6786	29.1271	29.1769	25.4605	25.2048	24.5709	22.9001	21.8936	22.3469	27.4958	28.1781
sp|Q49A26|GLYR1_HUMAN Putative oxidoreductase GLYR1 OS=Homo sapiens OX=9606 GN=GLYR1 PE=1 SV=4;sp|Q49A26-5|GLYR1_HUMAN Isoform 5 of Putative oxidoreductase GLYR1 OS=Homo sapiens OX=9606 GN=GLYR1;sp|Q49A26-2|GLYR1_HUMAN Isoform 2 of Putative oxidoreductase	Putative oxidoreductase GLYR1	GLYR1	+	4.68489	0	7.18177	+	+	4.49419	0	7.70785	+	+	2.65902	0.0123226	5.57596	+	+	3.01315	0	6.20132	+	17	17	17	40.1	40.1	40.1	60.547	0	216.07	10513000000	242	Q49A26;Q49A26-5;Q49A26-2;Q49A26-3;K7EMM8;Q49A26-4;K7EQB2;K7EPU6;K7ELL0	Q49A26;Q49A26-5;Q49A26-2;Q49A26-3;K7EMM8;Q49A26-4	21.1303	21.2994	22.1312	28.6634	28.749	28.6938	29.2605	28.8552	29.5688	23.508	21.7837	21.3469	28.4385	27.9945
tr|A0A0A0MQV9|A0A0A0MQV9_HUMAN Histone-lysine N-methyltransferase SETD1B OS=Homo sapiens OX=9606 GN=SETD1B PE=1 SV=1;sp|Q9UPS6-2|SET1B_HUMAN Isoform 2 of Histone-lysine N-methyltransferase SETD1B OS=Homo sapiens OX=9606 GN=SETD1B;sp|Q9UPS6|SET1B_HUMAN Hist	Histone-lysine N-methyltransferase;Histone-lysine N-methyltransferase SETD1B	SETD1B		0.663645	0.186107	-1.98775			0.267884	0.556663	-0.872175			0.222102	0.718969	-0.829621			0.274919	0.542218	-0.67507		10	10	10	8.1	8.1	8.1	208.77	0	17.433	640470000	20	A0A0A0MQV9;Q9UPS6-2;Q9UPS6	A0A0A0MQV9;Q9UPS6-2;Q9UPS6	22.6156	25.2482	25.4323	24.4413	21.2143	21.6772	21.6969	24.471	24.5117	24.6013	24.567	24.9512	21.0952	24.5438
sp|Q8IX12-2|CCAR1_HUMAN Isoform 2 of Cell division cycle and apoptosis regulator protein 1 OS=Homo sapiens OX=9606 GN=CCAR1;sp|Q8IX12|CCAR1_HUMAN Cell division cycle and apoptosis regulator protein 1 OS=Homo sapiens OX=9606 GN=CCAR1 PE=1 SV=2;tr|A0A0C4DGG8	Cell division cycle and apoptosis regulator protein 1	CCAR1	+	3.73454	0.00106667	7.1363	+	+	3.47172	0.000845209	6.74246	+	+	1.46809	0.0391567	6.02138	+	+	3.76799	0	6.72694	+	41	41	41	40.1	40.1	40.1	131.04	0	323.31	15181000000	391	Q8IX12-2;Q8IX12;A0A0C4DGG8;F5H2E6;F5H1H2;F5H3E1;H0YFJ7;F5H7M9;F5H1L3;F5H3I8	Q8IX12-2;Q8IX12;A0A0C4DGG8;F5H2E6;F5H1H2	22.6903	21.1754	22.8584	29.3342	29.4426	29.3562	28.8753	28.6128	29.4634	23.248	22.419	21.5337	30.2193	30.2981
sp|Q8IVF2|AHNK2_HUMAN Protein AHNAK2 OS=Homo sapiens OX=9606 GN=AHNAK2 PE=1 SV=2;sp|Q8IVF2-3|AHNK2_HUMAN Isoform 3 of Protein AHNAK2 OS=Homo sapiens OX=9606 GN=AHNAK2	Protein AHNAK2	AHNAK2	+	2.55498	0.00394937	7.11905	+	+	2.55361	0.00126841	5.77695	+	+	2.3702	0.0147556	9.38441	+	+	3.65005	0	8.75116	+	179	179	179	52	52	52	616.62	0	323.31	208270000000	1891	Q8IVF2;Q8IVF2-3;Q8IVF2-2	Q8IVF2;Q8IVF2-3	23.2984	26.1516	25.6543	32.752	32.8227	30.8867	30.7429	30.8747	30.8174	23.939	22.8772	25.2334	34.6627	35.0368
tr|A0A0A0MR02|A0A0A0MR02_HUMAN Outer mitochondrial membrane protein porin 2 (Fragment) OS=Homo sapiens OX=9606 GN=VDAC2 PE=1 SV=1;sp|P45880-2|VDAC2_HUMAN Isoform 2 of Voltage-dependent anion-selective channel protein 2 OS=Homo sapiens OX=9606 GN=VDAC2;sp|P	Voltage-dependent anion-selective channel protein 2	VDAC2	+	1.63463	0.0256864	-2.10387		+	1.28599	0.0334667	-0.431179			0.922672	0.25959	-0.429996		+	3.06652	0.000393258	-0.924067		11	11	11	52.1	52.1	52.1	30.348	0	40.439	2303000000	96	A0A0A0MR02;P45880-2;P45880;P45880-1;Q5JSD2;Q5JSD1;A2A3S1	A0A0A0MR02;P45880-2;P45880;P45880-1;Q5JSD2;Q5JSD1	25.4581	25.2255	25.6533	24.4774	22.928	22.62	25.1991	24.9743	24.8701	27.0106	27.098	27.2033	26.4766	26.4507
sp|Q9UHX1-6|PUF60_HUMAN Isoform 6 of Poly(U)-binding-splicing factor PUF60 OS=Homo sapiens OX=9606 GN=PUF60		PUF60	+	3.42043	0.0008	7.07381	+	+	3.14992	0.00126792	5.82089	+	+	2.06579	0.0142282	7.34126	+	+	3.41896	0	6.30894	+	27	27	0	72.1	72.1	0	55.399	0	323.31	22640000000	425	Q9UHX1-6	Q9UHX1-6	23.1167	22.7338	24.6723	30.9471	30.1294	30.6678	29.6045	29.0051	29.3759	21.569	23.1282	23.1946	31.1636	31.63
sp|O95926|SYF2_HUMAN Pre-mRNA-splicing factor SYF2 OS=Homo sapiens OX=9606 GN=SYF2 PE=1 SV=1;sp|O95926-2|SYF2_HUMAN Isoform 2 of Pre-mRNA-splicing factor SYF2 OS=Homo sapiens OX=9606 GN=SYF2	Pre-mRNA-splicing factor SYF2	SYF2	+	3.56141	0.000914286	7.03094	+	+	2.9304	0.00115044	4.8247	+		1.09998	0.0795167	4.34001		+	4.34045	0	4.79053	+	9	9	9	48.6	48.6	48.6	28.722	0	294.48	2438900000	72	O95926;O95926-2	O95926;O95926-2	22.8224	21.4413	20.8978	28.9721	28.5688	28.7135	26.6889	26.6295	26.3173	21.2115	21.8327	21.8533	28.1724	27.4344
tr|A0A0A0MR51|A0A0A0MR51_HUMAN Acyl-CoA (8-3)-desaturase OS=Homo sapiens OX=9606 GN=FADS1 PE=1 SV=1;sp|O60427|FADS1_HUMAN Acyl-CoA (8-3)-desaturase OS=Homo sapiens OX=9606 GN=FADS1 PE=1 SV=3;sp|O60427-2|FADS1_HUMAN Isoform 2 of Acyl-CoA (8-3)-desaturase OS	Fatty acid desaturase 1	FADS1		NaN	1	0			0.420102	0.290568	0.659276			0.358522	0.587904	-0.534986			0.542382	0.141171	0.710499		6	5	5	16.6	15.2	15.2	57.885	0	34.054	658900000	24	A0A0A0MR51;O60427;O60427-2;F5H3P6;H0YB97;F5H3U5;H7C2V0;F5H8G5;F5H852;F5GWE3	A0A0A0MR51;O60427;O60427-2	21.0092	21.8062	21.775	22.4723	21.9547	22.7026	20.96	22.8731	22.7352	24.8632	23.9159	24.1268	23.7618	24.7246
tr|A0A0A0MR74|A0A0A0MR74_HUMAN Acyl-CoA retinol O-fatty-acyltransferase OS=Homo sapiens OX=9606 GN=DGAT1 PE=1 SV=1;sp|O75907|DGAT1_HUMAN Diacylglycerol O-acyltransferase 1 OS=Homo sapiens OX=9606 GN=DGAT1 PE=1 SV=2	Diacylglycerol O-acyltransferase 1	DGAT1		NaN	1	0			NaN	1	0			0.68082	0.257064	1.58666			0.594175	0.0852592	-1.59835		2	2	2	17.8	17.8	17.8	33.529	0	8.063	111530000	5	A0A0A0MR74;O75907	A0A0A0MR74;O75907	20.9788	22.5623	23.0161	21.4696	22.5485	23.0812	22.0582	21.9081	22.8543	22.4482	21.0491	23.6348	23.2184	23.208
sp|Q9NWH9|SLTM_HUMAN SAFB-like transcription modulator OS=Homo sapiens OX=9606 GN=SLTM PE=1 SV=2;sp|Q9NWH9-3|SLTM_HUMAN Isoform 2 of SAFB-like transcription modulator OS=Homo sapiens OX=9606 GN=SLTM;tr|H7C3F4|H7C3F4_HUMAN SAFB-like transcription modulator	SAFB-like transcription modulator	SLTM	+	2.84493	0.00323404	7.02592	+	+	1.66691	0.00405751	3.449	+	+	1.96523	0.0176744	6.47393	+	+	2.17153	0.000402685	4.45381	+	40	40	40	42.7	42.7	42.7	117.15	0	323.31	6166700000	233	Q9NWH9;Q9NWH9-3;H7C3F4;H7BXE3;H0YL55;H0YKU6;H0YLE6;H0YMM0;H0YNF3;H0YMR6;H0YMW8;H0YKH2;H0YLW7	Q9NWH9;Q9NWH9-3;H7C3F4	22.8145	24.4546	21.3552	29.9627	29.8276	29.9119	26.7933	26.3903	25.7878	24.0122	21.1545	21.8285	29.4653	30.3876
sp|Q86U86-5|PB1_HUMAN Isoform 5 of Protein polybromo-1 OS=Homo sapiens OX=9606 GN=PBRM1;sp|Q86U86-7|PB1_HUMAN Isoform 7 of Protein polybromo-1 OS=Homo sapiens OX=9606 GN=PBRM1;sp|Q86U86-2|PB1_HUMAN Isoform 2 of Protein polybromo-1 OS=Homo sapiens OX=9606 G	Protein polybromo-1	PBRM1	+	4.98397	0	7.01269	+	+	5.21389	0	7.41164	+	+	5.092	0.0256	4.73968	+	+	5.60926	0	5.8946	+	47	47	47	35.7	35.7	35.7	182.12	0	323.31	9545500000	298	Q86U86-5;Q86U86-7;Q86U86-2;Q86U86-8;Q86U86;E7EVG2;Q86U86-3;Q86U86-4;Q86U86-9;H0Y5B5;Q86U86-6;C9JPI5;C9JQF1;C9J053;C9JCJ2	Q86U86-5;Q86U86-7;Q86U86-2;Q86U86-8;Q86U86;E7EVG2;Q86U86-3;Q86U86-4;Q86U86-9;H0Y5B5	22.2341	22.1135	21.6314	29.2818	29.0574	28.6779	29.2771	29.2382	29.6986	22.5946	22.7615	22.3132	27.4725	27.1456
tr|A8MUA9|A8MUA9_HUMAN SMT3 suppressor of mif two 3 homolog 3 (Yeast), isoform CRA_d OS=Homo sapiens OX=9606 GN=SUMO3 PE=1 SV=1;tr|A8MU27|A8MU27_HUMAN Small ubiquitin-related modifier 3 OS=Homo sapiens OX=9606 GN=SUMO3 PE=1 SV=1;sp|P55854|SUMO3_HUMAN Small	Small ubiquitin-related modifier 3	SUMO3	+	2.94602	0.00282486	7.01183	+	+	2.74474	0.00117426	5.83594	+	+	2.98102	0.017	7.66743	+	+	3.45017	0	7.43776	+	9	9	5	39.3	39.3	23.7	15.317	0	299.25	1279600000000	963	A8MUA9;A8MU27;P55854;P55854-2;J3KRH1	A8MUA9;A8MU27;P55854;P55854-2	28.7254	30.9757	31.1684	36.7482	37.358	37.7988	36.0073	36.334	36.036	27.8565	29.1014	26.8415	35.936	36.4664
sp|Q9BUA3|SPNDC_HUMAN Spindlin interactor and repressor of chromatin-binding protein OS=Homo sapiens OX=9606 GN=SPINDOC PE=1 SV=3	Uncharacterized protein C11orf84	C11orf84	+	3.22871	0.00209396	6.94865	+	+	3.09847	0.00123077	6.39011	+		0.835931	0.160063	3.59569		+	3.14996	0	4.79391	+	16	16	16	67.2	67.2	67.2	41.036	0	296.38	10264000000	236	Q9BUA3;H0YGY5;H0YGK9	Q9BUA3	22.0831	24.033	24.2707	30.299	30.6568	30.277	29.7174	29.8021	30.0376	23.4651	22.0331	21.942	28.2791	27.7263
sp|Q14149|MORC3_HUMAN MORC family CW-type zinc finger protein 3 OS=Homo sapiens OX=9606 GN=MORC3 PE=1 SV=3	MORC family CW-type zinc finger protein 3	MORC3	+	4.95344	0	6.93709	+	+	4.08185	0	8.66302	+	+	3.11347	0.0155556	7.32501	+	+	4.13815	0	8.34748	+	54	54	54	72	72	72	107.11	0	323.31	44088000000	657	Q14149;H0YHQ4;H0YIR5	Q14149	22.4776	22.9524	22.0831	29.4912	29.3377	29.4954	30.4194	31.0536	32.0291	21.9077	22.5119	22.6202	29.7598	30.9473
tr|A0A0A0MRR1|A0A0A0MRR1_HUMAN Zinc finger protein 691 (Fragment) OS=Homo sapiens OX=9606 GN=ZNF691 PE=1 SV=1;tr|Q5VV50|Q5VV50_HUMAN Zinc finger protein 691 OS=Homo sapiens OX=9606 GN=ZNF691 PE=1 SV=1;sp|Q5VV52-3|ZN691_HUMAN Isoform 2 of Zinc finger protei	Zinc finger protein 691	ZNF691		0.559704	0.358283	0.368851		+	1.36325	0.015792	-0.720812			0.171304	0.822267	0.1828		+	1.44291	0.00426913	-1.79107		5	5	5	20.9	20.9	20.9	33.708	0	14.191	427170000	22	A0A0A0MRR1;Q5VV50;Q5VV52-3;Q5VV52;Q5VV51	A0A0A0MRR1;Q5VV50;Q5VV52-3;Q5VV52;Q5VV51	25.3738	25.2085	24.6086	25.7864	25.2371	25.2741	24.4017	24.4488	24.1781	24.6359	24.1881	24.6121	24.497	24.1075
tr|Q5STV6|Q5STV6_HUMAN Inhibitor of kappa B-like protein OS=Homo sapiens OX=9606 GN=NFKBIL1 PE=1 SV=2;tr|A0A0A0MRT5|A0A0A0MRT5_HUMAN Inhibitor of kappa B-like protein OS=Homo sapiens OX=9606 GN=NFKBIL1 PE=1 SV=1;sp|Q9UBC1-2|IKBL1_HUMAN Isoform 2 of NF-kapp	NF-kappa-B inhibitor-like protein 1	NFKBIL1		NaN	1	0			NaN	1	0			NaN	1	0		+	0.879505	0.0266567	1.41711	+	4	4	4	17	17	17	40.827	0	7.6196	244940000	3	Q5STV6;A0A0A0MRT5;Q9UBC1-2;Q9UBC1-3;Q9UBC1;F2Z390;A0A140TA04	Q5STV6;A0A0A0MRT5;Q9UBC1-2;Q9UBC1-3;Q9UBC1	23.3417	22.9555	23.5084	22.9594	22.2304	20.2891	21.0719	22.6873	21.9471	22.8071	23.3806	21.0792	23.543	23.2623
sp|Q13435|SF3B2_HUMAN Splicing factor 3B subunit 2 OS=Homo sapiens OX=9606 GN=SF3B2 PE=1 SV=2;tr|E9PPJ0|E9PPJ0_HUMAN Splicing factor 3B subunit 2 OS=Homo sapiens OX=9606 GN=SF3B2 PE=1 SV=1	Splicing factor 3B subunit 2	SF3B2	+	3.24451	0.0014069	6.87907	+	+	3.07051	0.00119149	6.01708	+	+	1.76201	0.0225064	6.52462	+	+	3.20641	0	6.08275	+	36	36	36	52.7	52.7	52.7	100.23	0	323.31	21363000000	420	Q13435;E9PPJ0;E9PJ04;E9PJT3;H0YCG1;H0YEX5;E9PIL8	Q13435;E9PPJ0	21.6536	23.6897	23.5782	30.2508	29.6712	29.6367	28.8736	29.2091	28.8899	24.283	22.1418	22.9744	30.8876	31.4976
sp|O00422-2|SAP18_HUMAN Isoform 2 of Histone deacetylase complex subunit SAP18 OS=Homo sapiens OX=9606 GN=SAP18;sp|O00422|SAP18_HUMAN Histone deacetylase complex subunit SAP18 OS=Homo sapiens OX=9606 GN=SAP18 PE=1 SV=1;tr|H7BZW6|H7BZW6_HUMAN Histone deacet	Histone deacetylase complex subunit SAP18	SAP18	+	2.824	0.00315026	6.86355	+	+	2.1262	0.00163799	4.38351	+	+	2.12024	0.0147737	7.11642	+	+	3.66271	0	6.05642	+	13	13	13	65.7	65.7	65.7	19.526	0	323.31	10535000000	180	O00422-2;O00422;H7BZW6;U3KPY7;U3KQ12	O00422-2;O00422;H7BZW6	21.1832	22.2184	24.1324	29.6065	28.9779	29.5402	27.1049	26.9682	26.6115	22.0818	22.5872	21.3508	30.889	30.0822
tr|B3KPJ4|B3KPJ4_HUMAN Polyhomeotic-like protein 2 OS=Homo sapiens OX=9606 GN=PHC2 PE=1 SV=1;tr|A0A0A0MSI2|A0A0A0MSI2_HUMAN Polyhomeotic-like protein 2 OS=Homo sapiens OX=9606 GN=PHC2 PE=1 SV=1;sp|Q8IXK0-2|PHC2_HUMAN Isoform 2 of Polyhomeotic-like protein	Polyhomeotic-like protein 2	PHC2		NaN	1	0			NaN	1	0			0.796293	0.185378	2.70298		+	3.0182	0	2.62524	+	9	9	7	19.8	19.8	17.5	50.403	0	24.574	845750000	29	B3KPJ4;A0A0A0MSI2;Q8IXK0-2;Q8IXK0-4;Q8IXK0;Q8IXK0-5;Q8IXK0-3	B3KPJ4;A0A0A0MSI2;Q8IXK0-2;Q8IXK0-4;Q8IXK0;Q8IXK0-5;Q8IXK0-3	20.4562	22.547	22.5865	22.0873	22.3433	21.8585	21.9159	21.0414	21.486	22.3173	22.7065	22.8475	27.2047	26.5456
sp|Q03188|CENPC_HUMAN Centromere protein C OS=Homo sapiens OX=9606 GN=CENPC PE=1 SV=2;tr|H0Y8J2|H0Y8J2_HUMAN Centromere protein C (Fragment) OS=Homo sapiens OX=9606 GN=CENPC PE=1 SV=1;sp|Q03188-2|CENPC_HUMAN Isoform 2 of Centromere protein C OS=Homo sapien	Centromere protein C	CENPC	+	3.06222	0.0030303	6.82432	+	+	2.97242	0.00124601	6.23202	+		1.31613	0.0529786	4.02804		+	1.49104	0.0027395	3.5861	+	32	32	32	47.6	47.6	47.6	106.83	0	258.62	5103700000	212	Q03188;H0Y8J2;Q03188-2;H0Y9W1	Q03188;H0Y8J2;Q03188-2	22.6278	20.5543	22.8494	28.867	29.2	28.4374	28.3159	28.3397	28.0719	21.4621	25.2571	23.8863	28.6164	28.3162
sp|P38919|IF4A3_HUMAN Eukaryotic initiation factor 4A-III OS=Homo sapiens OX=9606 GN=EIF4A3 PE=1 SV=4;tr|I3L3H2|I3L3H2_HUMAN RNA helicase OS=Homo sapiens OX=9606 GN=EIF4A3 PE=1 SV=2	Eukaryotic initiation factor 4A-III;Eukaryotic initiation factor 4A-III, N-terminally processed	EIF4A3	+	5.23599	0	6.80153	+	+	5.15567	0	5.55397	+	+	1.67196	0.0262622	5.6017	+	+	1.99687	0.000571936	5.23496	+	21	21	19	57.7	57.7	53.3	46.871	0	250.34	6520000000	127	P38919;I3L3H2;C9JUF0;J3QL52;J3QQP0;E9PBH4;F8WE11	P38919;I3L3H2	21.4754	21.3401	21.9412	28.5819	28.1943	28.3852	27.1102	27.1667	27.1418	21.0087	22.1113	24.7772	29.4029	29.1292
sp|Q01780|EXOSX_HUMAN Exosome component 10 OS=Homo sapiens OX=9606 GN=EXOSC10 PE=1 SV=2;sp|Q01780-2|EXOSX_HUMAN Isoform 2 of Exosome component 10 OS=Homo sapiens OX=9606 GN=EXOSC10	Exosome component 10	EXOSC10	+	3.61161	0.00096	6.76779	+	+	4.00903	0.00064	7.72336	+		0.893866	0.131105	4.5725		+	3.51078	0	7.18832	+	44	44	44	64.1	64.1	64.1	100.83	0	323.31	21525000000	354	Q01780;Q01780-2;K7EJ37	Q01780;Q01780-2	22.2228	21.7855	20.6914	28.8865	28.2713	27.8452	29.1678	29.0357	29.6663	23.0867	21.7099	23.7744	29.8693	29.6
sp|Q9NYF8-2|BCLF1_HUMAN Isoform 2 of Bcl-2-associated transcription factor 1 OS=Homo sapiens OX=9606 GN=BCLAF1;sp|Q9NYF8|BCLF1_HUMAN Bcl-2-associated transcription factor 1 OS=Homo sapiens OX=9606 GN=BCLAF1 PE=1 SV=2;sp|Q9NYF8-4|BCLF1_HUMAN Isoform 4 of Bc	Bcl-2-associated transcription factor 1	BCLAF1	+	3.77177	0.00109091	6.76293	+	+	2.99538	0.00118361	4.31369	+	+	2.46723	0.01312	8.28719	+	+	3.47686	0	7.1496	+	48	48	4	44	44	5.4	105.95	0	323.31	151460000000	1032	Q9NYF8-2;Q9NYF8;Q9NYF8-4;H0YF14	Q9NYF8-2;Q9NYF8;Q9NYF8-4	27.1623	28.1674	26.4545	34.0546	34.0155	34.0029	31.5611	31.455	31.7092	25.1423	25.6934	23.6068	34.1352	34.418
sp|Q9H3D4|P63_HUMAN Tumor protein 63 OS=Homo sapiens OX=9606 GN=TP63 PE=1 SV=1;sp|Q9H3D4-11|P63_HUMAN Isoform 11 of Tumor protein 63 OS=Homo sapiens OX=9606 GN=TP63;sp|Q9H3D4-9|P63_HUMAN Isoform 9 of Tumor protein 63 OS=Homo sapiens OX=9606 GN=TP63;sp|Q9H3	Tumor protein 63	TP63	+	4.27345	0	4.06038	+	+	5.53978	0	7.65001	+		0.010365	0.987551	-0.0297076			0.322895	0.472013	0.469531		28	28	26	44.6	44.6	42.5	76.785	0	323.31	4693600000	133	Q9H3D4;Q9H3D4-11;Q9H3D4-9;Q9H3D4-2;Q9H3D4-7;Q9H3D4-3;Q9H3D4-12;Q9H3D4-10;Q9H3D4-5;Q9H3D4-8;Q9H3D4-4;Q9H3D4-6	Q9H3D4;Q9H3D4-11;Q9H3D4-9;Q9H3D4-2;Q9H3D4-7;Q9H3D4-3;Q9H3D4-12;Q9H3D4-10;Q9H3D4-5;Q9H3D4-8;Q9H3D4-4;Q9H3D4-6	21.821	22.452	21.9281	26.3417	26.0404	26.0001	29.6139	29.7627	29.7745	21.5667	22.7253	21.3324	20.1815	22.8886
sp|Q8TAD8|SNIP1_HUMAN Smad nuclear-interacting protein 1 OS=Homo sapiens OX=9606 GN=SNIP1 PE=1 SV=1	Smad nuclear-interacting protein 1	SNIP1	+	4.61631	0	6.75778	+	+	3.93678	0.000776316	4.45226	+	+	2.70148	0.0141481	8.62658	+	+	6.79009	0	8.51885	+	26	26	26	59.6	59.6	59.6	45.777	0	323.31	133080000000	632	Q8TAD8	Q8TAD8	26.7703	26.885	25.9484	33.2748	33.1756	33.4265	31.047	30.9924	30.921	23.9382	23.6798	23.8739	33.7455	33.5631
sp|O94888|UBXN7_HUMAN UBX domain-containing protein 7 OS=Homo sapiens OX=9606 GN=UBXN7 PE=1 SV=2;tr|C9JAT7|C9JAT7_HUMAN UBX domain-containing protein 7 OS=Homo sapiens OX=9606 GN=UBXN7 PE=1 SV=1	UBX domain-containing protein 7	UBXN7	+	4.79376	0	6.73093	+	+	4.85639	0	5.71626	+		0.223777	0.718729	0.745462		+	1.58043	0.00310249	1.74396	+	16	16	16	44.6	44.6	44.6	54.862	0	112.3	1708600000	87	O94888;C9JAT7;F8WB69;C9JD50;H7BYF4	O94888;C9JAT7	21.674	22.3689	21.8668	29.0481	28.5947	28.4597	27.6323	27.8516	27.5746	23.5164	22.1802	22.4938	24.8235	24.5982
tr|H0Y3T8|H0Y3T8_HUMAN Zinc finger protein 211 (Fragment) OS=Homo sapiens OX=9606 GN=ZNF211 PE=1 SV=1;tr|A0A0A0MTK1|A0A0A0MTK1_HUMAN Zinc finger protein 211 OS=Homo sapiens OX=9606 GN=ZNF211 PE=1 SV=1;sp|Q13398-5|ZN211_HUMAN Isoform 5 of Zinc finger protei	Zinc finger protein 211	ZNF211		NaN	1	0			NaN	1	0			NaN	1	0		+	1.45157	0.00494898	1.27576	+	10	4	4	20.6	9.7	9.7	64.601	0	4.5077	146560000	6	H0Y3T8;A0A0A0MTK1;Q13398-5;Q13398-6;Q13398-2;Q13398;Q13398-4;Q13398-3;Q13398-7;Q13398-8	H0Y3T8;A0A0A0MTK1;Q13398-5;Q13398-6;Q13398-2;Q13398;Q13398-4;Q13398-3;Q13398-7;Q13398-8	22.2203	23.4739	22.1425	20.9387	21.9159	22.2021	22.718	21.8824	21.8772	21.2581	21.4783	22.4884	20.9377	21.948
sp|P78332|RBM6_HUMAN RNA-binding protein 6 OS=Homo sapiens OX=9606 GN=RBM6 PE=1 SV=5;tr|E9PGM9|E9PGM9_HUMAN RNA-binding protein 6 OS=Homo sapiens OX=9606 GN=RBM6 PE=1 SV=1;tr|F8WCA5|F8WCA5_HUMAN RNA-binding protein 6 OS=Homo sapiens OX=9606 GN=RBM6 PE=1 SV	RNA-binding protein 6	RBM6	+	3.94306	0	6.71698	+	+	3.95751	0.000544681	6.87225	+		1.18043	0.0678413	4.79554		+	5.09379	0	6.81961	+	47	47	47	46.5	46.5	46.5	128.64	0	282.08	14467000000	274	P78332;E9PGM9;F8WCA5;P78332-3;P78332-2;C9J250;F8WF63;C9JSL1;C9JMC8;C9JII0	P78332;E9PGM9;F8WCA5;P78332-3	21.1955	22.0062	22.7308	28.7914	28.6883	28.6037	28.8923	28.9865	28.6704	22.9591	22.3635	22.4698	29.1612	29.4241
tr|A0A0A6YYA0|A0A0A6YYA0_HUMAN Protein TMED7-TICAM2 OS=Homo sapiens OX=9606 GN=TMED7-TICAM2 PE=3 SV=1;sp|Q86XR7-2|TCAM2_HUMAN Isoform 2 of TIR domain-containing adapter molecule 2 OS=Homo sapiens OX=9606 GN=TICAM2;sp|Q9Y3B3-2|TMED7_HUMAN Isoform 2 of Trans	Transmembrane emp24 domain-containing protein 7	TMED7-TICAM2;TMED7		NaN	1	0			0.86812	0.0672418	0.562606			0.902389	0.183851	-1.03296		+	1.48019	0.00317736	-2.66947		6	6	6	45.2	45.2	45.2	21.233	0	33.524	737130000	26	A0A0A6YYA0;Q86XR7-2;Q9Y3B3-2;Q9Y3B3;G3V2Y2	A0A0A6YYA0;Q86XR7-2;Q9Y3B3-2;Q9Y3B3	22.6663	23.4108	23.4592	21.1601	21.4907	22.5493	23.5167	23.6605	24.0469	26.1066	26.5202	26.0308	25.231	24.278
sp|Q9ULU4-13|PKCB1_HUMAN Isoform 13 of Protein kinase C-binding protein 1 OS=Homo sapiens OX=9606 GN=ZMYND8;sp|Q9ULU4-16|PKCB1_HUMAN Isoform 16 of Protein kinase C-binding protein 1 OS=Homo sapiens OX=9606 GN=ZMYND8;sp|Q9ULU4-9|PKCB1_HUMAN Isoform 9 of Pro		ZMYND8	+	4.2143	0	6.71085	+	+	4.22914	0	7.28622	+	+	2.89759	0.0143158	6.01232	+	+	4.41269	0	6.49268	+	42	42	0	47	47	0	131.58	0	323.31	14073000000	345	Q9ULU4-13;Q9ULU4-16;Q9ULU4-9;Q9ULU4-8;H7C4X9;Q9ULU4-22;A0A087WVZ6;Q9ULU4-6;Q9ULU4-23	Q9ULU4-13;Q9ULU4-16;Q9ULU4-9;Q9ULU4-8;H7C4X9;Q9ULU4-22;A0A087WVZ6;Q9ULU4-6;Q9ULU4-23	23.0436	22.0436	21.9484	29.3121	29.0632	28.7927	29.5548	29.3061	30.0333	22.1634	22.2453	23.1114	29.3214	29.0645
sp|Q53F19|NCBP3_HUMAN Nuclear cap-binding protein subunit 3 OS=Homo sapiens OX=9606 GN=NCBP3 PE=1 SV=2;sp|Q53F19-2|NCBP3_HUMAN Isoform 2 of Nuclear cap-binding protein subunit 3 OS=Homo sapiens OX=9606 GN=NCBP3	Uncharacterized protein C17orf85	C17orf85	+	3.9893	0	6.7024	+	+	3.89795	0.000867647	5.96506	+	+	1.48408	0.0404875	4.21052	+	+	4.31263	0	4.92371	+	17	17	17	31.8	31.8	31.8	70.592	0	115.85	5723400000	133	Q53F19;Q53F19-2;K7ELP6	Q53F19;Q53F19-2	21.6829	21.3743	22.4913	28.8693	28.7888	27.9976	27.6117	28.2822	27.5497	22.9893	23.1147	22.3339	28.3411	28.2891
sp|Q12888|TP53B_HUMAN TP53-binding protein 1 OS=Homo sapiens OX=9606 GN=TP53BP1 PE=1 SV=2;sp|Q12888-2|TP53B_HUMAN Isoform 2 of TP53-binding protein 1 OS=Homo sapiens OX=9606 GN=TP53BP1;sp|Q12888-3|TP53B_HUMAN Isoform 3 of TP53-binding protein 1 OS=Homo sap	Tumor suppressor p53-binding protein 1	TP53BP1	+	5.25431	0	6.69254	+	+	4.53855	0	4.94256	+	+	2.47994	0.0133494	5.99795	+	+	3.2967	0	3.5579	+	62	62	62	49.5	49.5	49.5	213.57	0	323.31	11774000000	465	Q12888;Q12888-2;Q12888-3;A6NNK5;C9JXV0;H7BZY0;H7C3N7;M0R142;H7C495	Q12888;Q12888-2;Q12888-3;A6NNK5	24.1559	23.8333	24.4241	30.9999	30.8896	30.6014	29.108	28.7944	29.3385	23.7371	23.4243	23.6273	30.657	30.4329
sp|Q96FZ2|HMCES_HUMAN Abasic site processing protein HMCES OS=Homo sapiens OX=9606 GN=HMCES PE=1 SV=1;tr|E7EMP6|E7EMP6_HUMAN Abasic site processing protein HMCES OS=Homo sapiens OX=9606 GN=HMCES PE=1 SV=1;tr|D6R9T3|D6R9T3_HUMAN Abasic site processing prote	Embryonic stem cell-specific 5-hydroxymethylcytosine-binding protein	HMCES	+	2.89445	0.00271739	6.6421	+	+	3.40891	0.000853598	8.9637	+		0.902907	0.129743	3.99385		+	3.58669	0	9.53631	+	22	22	22	62.1	62.1	62.1	40.574	0	323.31	39590000000	276	Q96FZ2;E7EMP6;D6R9T3;D6RAZ3;D6RGK7;D6RAI0	Q96FZ2;E7EMP6;D6R9T3;D6RAZ3	21.4131	21.738	24.0042	29.0189	29.2188	28.844	31.2955	31.4244	31.3265	20.6698	22.843	20.3679	27.5029	26.8763
sp|Q13573|SNW1_HUMAN SNW domain-containing protein 1 OS=Homo sapiens OX=9606 GN=SNW1 PE=1 SV=1;tr|G3V3A4|G3V3A4_HUMAN SNW domain-containing protein 1 OS=Homo sapiens OX=9606 GN=SNW1 PE=1 SV=1;tr|G3V4X8|G3V4X8_HUMAN SNW domain-containing protein 1 OS=Homo s	SNW domain-containing protein 1	SNW1	+	2.82414	0.00311795	6.62966	+	+	2.48667	0.00133333	5.34884	+	+	2.05073	0.0176727	4.38841	+	+	5.01417	0	4.10703	+	21	21	21	43.8	43.8	43.8	61.494	0	132.54	3899300000	173	Q13573;G3V3A4;G3V4X8;G3V5R3	Q13573;G3V3A4;G3V4X8	23.5428	20.6084	22.0018	28.7738	28.831	28.4373	27.3971	27.5192	27.2832	23.0679	22.9694	22.6481	28.0841	28.3044
sp|O95391|SLU7_HUMAN Pre-mRNA-splicing factor SLU7 OS=Homo sapiens OX=9606 GN=SLU7 PE=1 SV=2	Pre-mRNA-splicing factor SLU7	SLU7	+	3.46997	0.000827586	6.59751	+	+	3.50316	0.000888889	6.96484	+		0.342814	0.587245	0.734709		+	3.40757	0	4.5553	+	29	29	29	59.2	59.2	59.2	68.386	0	323.31	17346000000	204	O95391;E5RGM7;E5RK41;A0A0C4DGD2	O95391	21.2082	22.2204	20.2207	27.9094	27.7667	27.7658	28.0016	28.5051	28.0372	25.0421	25.336	26.3664	27.2916	26.9074
sp|Q9UIS9-12|MBD1_HUMAN Isoform 12 of Methyl-CpG-binding domain protein 1 OS=Homo sapiens OX=9606 GN=MBD1;sp|Q9UIS9-2|MBD1_HUMAN Isoform 2 of Methyl-CpG-binding domain protein 1 OS=Homo sapiens OX=9606 GN=MBD1	Methyl-CpG-binding domain protein 1	MBD1	+	2.36495	0.00457143	6.49694	+	+	2.41302	0.00141176	7.09404	+	+	2.59192	0.0121644	4.72914	+	+	3.20905	0	5.28051	+	22	22	2	51	51	4.9	72.125	0	323.31	8958000000	232	Q9UIS9-12;Q9UIS9-2	Q9UIS9-12;Q9UIS9-2	24.2651	23.5599	20.6472	29.0694	29.4834	29.4102	29.767	29.2956	30.6916	20.8607	22.5084	21.7786	27.3056	26.5151
tr|A0A0C4DFM2|A0A0C4DFM2_HUMAN HCG1643764, isoform CRA_b OS=Homo sapiens OX=9606 GN=ZNF574 PE=1 SV=1;sp|Q6ZN55|ZN574_HUMAN Zinc finger protein 574 OS=Homo sapiens OX=9606 GN=ZNF574 PE=1 SV=2;sp|Q6ZN55-2|ZN574_HUMAN Isoform 2 of Zinc finger protein 574 OS=H	Zinc finger protein 574	ZNF574		0.398118	0.521413	-0.354129		+	1.26134	0.0170691	-0.862694			0.691591	0.341913	-0.481633		+	2.73625	0.000769099	-0.909647		9	9	9	16.5	16.5	16.5	108.7	0	51.867	939270000	28	A0A0C4DFM2;Q6ZN55;Q6ZN55-2;M0R133	A0A0C4DFM2;Q6ZN55;Q6ZN55-2	25.7091	25.3423	26.3322	25.6355	24.9613	25.7244	24.7549	25.2077	24.8328	25.8941	25.4952	25.8045	24.7338	25.2661
sp|O15228|GNPAT_HUMAN Dihydroxyacetone phosphate acyltransferase OS=Homo sapiens OX=9606 GN=GNPAT PE=1 SV=1;sp|O15228-2|GNPAT_HUMAN Isoform 2 of Dihydroxyacetone phosphate acyltransferase OS=Homo sapiens OX=9606 GN=GNPAT;tr|Q5TBH8|Q5TBH8_HUMAN Dihydroxyace	Dihydroxyacetone phosphate acyltransferase	GNPAT		NaN	1	0		+	5.47214	0	7.32871	+		0.715044	0.357513	-0.394431		+	2.50403	0.00102598	-1.02803		25	25	25	50.1	50.1	50.1	77.187	0	274.86	39953000000	123	O15228;O15228-2;Q5TBH8;Q5TBH6;A0A2R8YH69	O15228;O15228-2;Q5TBH8	21.7588	21.2714	21.9448	20.711	23.3362	21.855	28.9737	28.9994	28.9881	30.3888	30.2012	30.1965	29.7887	29.4902
sp|P61956|SUMO2_HUMAN Small ubiquitin-related modifier 2 OS=Homo sapiens OX=9606 GN=SUMO2 PE=1 SV=3;sp|P61956-2|SUMO2_HUMAN Isoform 2 of Small ubiquitin-related modifier 2 OS=Homo sapiens OX=9606 GN=SUMO2	Small ubiquitin-related modifier 2	SUMO2	+	2.78283	0.00298039	6.45019	+	+	3.5749	0.00103303	9.52475	+	+	2.35443	0.01328	5.55036	+	+	3.5919	0	10.1903	+	8	4	4	51.6	29.5	29.5	10.871	0	248.91	103520000000	99	P61956;P61956-2	P61956;P61956-2	22.1209	22.3987	24.5451	30.1588	28.8537	29.4028	32.5451	32.8528	32.2411	23.7852	23.3749	21.1985	28.7782	28.9389
tr|A0A0C4DG07|A0A0C4DG07_HUMAN Nibrin OS=Homo sapiens OX=9606 GN=NBN PE=1 SV=1;sp|O60934|NBN_HUMAN Nibrin OS=Homo sapiens OX=9606 GN=NBN PE=1 SV=1	Nibrin	NBN		NaN	1	0			0.110373	0.870884	-0.177751			0.306969	0.630592	0.646547			0.80891	0.0552053	0.669434		4	4	4	7.4	7.4	7.4	75.968	0	6.4362	107800000	5	A0A0C4DG07;O60934;A0A087X1V5;E5RGU1;E5RGR7	A0A0C4DG07;O60934	21.211	21.0415	22.1185	23.3149	22.185	21.534	21.7568	21.7565	20.3245	21.899	21.0815	22.3753	23.9022	22.0974
tr|G8JL98|G8JL98_HUMAN G/T mismatch-specific thymine DNA glycosylase OS=Homo sapiens OX=9606 GN=TDG PE=1 SV=1;sp|Q13569|TDG_HUMAN G/T mismatch-specific thymine DNA glycosylase OS=Homo sapiens OX=9606 GN=TDG PE=1 SV=2;tr|B4E127|B4E127_HUMAN G/T mismatch-spe	G/T mismatch-specific thymine DNA glycosylase	TDG	+	3.70572	0.00102128	6.38379	+	+	3.5355	0.000873096	5.88853	+	+	2.623	0.0117538	5.62061	+	+	4.90745	0	7.07307	+	12	12	7	32.5	32.5	22.4	45.683	0	238.72	14235000000	98	G8JL98;Q13569;B4E127;F5H0I7;H0YH18	G8JL98;Q13569;B4E127;F5H0I7;H0YH18	22.9002	21.3723	21.5551	28.4477	28.348	28.1833	27.8064	27.6301	28.0568	22.3618	22.7556	21.8305	29.0277	28.3469
tr|A0A0C4DG49|A0A0C4DG49_HUMAN Poliovirus receptor OS=Homo sapiens OX=9606 GN=PVR PE=1 SV=1;sp|P15151-3|PVR_HUMAN Isoform Gamma of Poliovirus receptor OS=Homo sapiens OX=9606 GN=PVR;sp|P15151-2|PVR_HUMAN Isoform Beta of Poliovirus receptor OS=Homo sapiens	Poliovirus receptor	PVR	+	1.25577	0.047868	-1.52181			0.0255804	0.970675	-0.0236187			0.310438	0.691858	0.242802		+	0.981959	0.018309	-1.39		3	3	3	8.4	8.4	8.4	45.32	0	7.3859	223250000	23	A0A0C4DG49;P15151-3;P15151-2;P15151;A0A0A0MSA9;P15151-4	A0A0C4DG49;P15151-3;P15151-2;P15151;A0A0A0MSA9;P15151-4	23.771	24.204	24.2596	23.6017	21.7517	22.3159	23.9616	24.5582	23.6439	23.5271	23.3359	23.4348	23.2728	23.4583
sp|Q8NB90|AFG2H_HUMAN ATPase family protein 2 homolog OS=Homo sapiens OX=9606 GN=SPATA5 PE=1 SV=3;sp|Q8NB90-3|AFG2H_HUMAN Isoform 3 of ATPase family protein 2 homolog OS=Homo sapiens OX=9606 GN=SPATA5;sp|Q8NB90-2|AFG2H_HUMAN Isoform 2 of ATPase family prot	Spermatogenesis-associated protein 5	SPATA5	+	3.16988	0.002	6.37544	+	+	3.21322	0.000975	7.55062	+	+	2.25029	0.0153226	4.38918	+	+	3.06867	0	5.59133	+	8	8	7	11.9	11.9	10.5	97.903	0	11.739	6810900000	21	Q8NB90;Q8NB90-3;Q8NB90-2;J3QRR3;J3QRW1;J3QLH6;J3KRP2;J3QSA9;J3QQM1	Q8NB90;Q8NB90-3;Q8NB90-2	21.1565	20.9359	23.0393	28.1647	28.0783	28.015	29.4873	29.7907	28.5056	23.492	23.0163	21.4623	28.0505	26.8344
sp|Q9Y4E5-4|ZN451_HUMAN Isoform 3 of E3 SUMO-protein ligase ZNF451 OS=Homo sapiens OX=9606 GN=ZNF451	Zinc finger protein 451	ZNF451	+	2.72632	0.00383333	6.36616	+	+	3.12785	0.00114286	7.86064	+	+	2.29931	0.0143762	7.75594	+	+	2.98342	0	9.03925	+	31	31	31	69.6	69.6	69.6	63.02	0	323.31	54670000000	476	Q9Y4E5-4;D6RAS1	Q9Y4E5-4	21.6796	24.4667	22.3109	29.5701	28.7971	29.1885	30.7166	30.5708	30.7517	24.3606	20.8823	21.9437	31.4965	30.5914
sp|Q16649|NFIL3_HUMAN Nuclear factor interleukin-3-regulated protein OS=Homo sapiens OX=9606 GN=NFIL3 PE=1 SV=2	Nuclear factor interleukin-3-regulated protein	NFIL3	+	4.30341	0	6.27989	+	+	3.91995	0.00082807	5.13396	+	+	2.12703	0.0144218	4.67544	+	+	5.1077	0	5.90358	+	16	16	16	50.4	50.4	50.4	51.471	0	200.68	7072700000	146	Q16649	Q16649	22.9362	22.0074	21.8562	28.5968	28.5245	28.5182	27.55	27.3016	27.3502	22.8488	22.3938	22.2679	28.3116	27.8625
tr|A0A0C4DGH0|A0A0C4DGH0_HUMAN CD276 antigen OS=Homo sapiens OX=9606 GN=CD276 PE=1 SV=1;sp|Q5ZPR3-3|CD276_HUMAN Isoform 3 of CD276 antigen OS=Homo sapiens OX=9606 GN=CD276;sp|Q5ZPR3-4|CD276_HUMAN Isoform 4 of CD276 antigen OS=Homo sapiens OX=9606 GN=CD276;	CD276 antigen	CD276		NaN	1	0			NaN	1	0			1.36334	0.059974	-1.54885		+	1.64013	0.00293407	-1.47314		4	4	4	17.3	17.3	17.3	41.767	0	11.496	144320000	11	A0A0C4DGH0;Q5ZPR3-3;Q5ZPR3-4;Q5ZPR3;Q5ZPR3-2;H0YK40;H0YK59;H0YL10;H0YLT8;H0YN85;H0YN29	A0A0C4DGH0;Q5ZPR3-3;Q5ZPR3-4;Q5ZPR3;Q5ZPR3-2;H0YK40;H0YK59;H0YL10	21.953	23.0311	21.9794	20.3561	22.4171	22.104	22.1182	22.8651	22.2996	23.8784	23.4963	24.1192	21.5511	23.2357
sp|P05423|RPC4_HUMAN DNA-directed RNA polymerase III subunit RPC4 OS=Homo sapiens OX=9606 GN=POLR3D PE=1 SV=2;tr|E5RHT4|E5RHT4_HUMAN DNA-directed RNA polymerase III subunit RPC4 (Fragment) OS=Homo sapiens OX=9606 GN=POLR3D PE=1 SV=1	DNA-directed RNA polymerase III subunit RPC4	POLR3D	+	3.91578	0	6.25211	+	+	4.11508	0.000609524	5.72529	+	+	2.38038	0.0142796	6.61589	+	+	2.64878	0	5.53075	+	22	22	22	61.3	61.3	61.3	44.395	0	323.31	7666100000	172	P05423;E5RHT4;E7EQ68	P05423;E5RHT4	23.2107	22.1874	22.5631	29.4893	28.7248	28.5035	28.1001	28.6906	28.3464	23.2799	20.5738	22.2451	29.703	29.1668
sp|O75152|ZC11A_HUMAN Zinc finger CCCH domain-containing protein 11A OS=Homo sapiens OX=9606 GN=ZC3H11A PE=1 SV=3;tr|E9PQ61|E9PQ61_HUMAN Zinc finger CCCH domain-containing protein 11A OS=Homo sapiens OX=9606 GN=ZC3H11A PE=1 SV=1;tr|E9PBY7|E9PBY7_HUMAN Zinc	Zinc finger CCCH domain-containing protein 11A	ZC3H11A	+	4.57784	0	6.24808	+	+	4.45241	0	6.14828	+	+	1.83065	0.0202791	5.02885	+	+	4.20872	0	7.23373	+	25	25	20	37.3	37.3	31.1	89.13	0	323.31	14241000000	231	O75152;E9PQ61;E9PBY7;A0A1W2PPR9	O75152;E9PQ61;E9PBY7	22.5247	21.6791	22.5526	28.4656	28.5306	28.5044	28.4449	28.5493	28.207	21.6182	22.8125	22.7858	28.502	28.6832
tr|A0A0C4DGS9|A0A0C4DGS9_HUMAN Choline/ethanolaminephosphotransferase 1 OS=Homo sapiens OX=9606 GN=CEPT1 PE=1 SV=1;sp|Q9Y6K0|CEPT1_HUMAN Choline/ethanolaminephosphotransferase 1 OS=Homo sapiens OX=9606 GN=CEPT1 PE=1 SV=1	Choline/ethanolaminephosphotransferase 1	CEPT1		NaN	1	0			NaN	1	0		+	1.55747	0.0389942	-2.78209		+	1.28226	0.00488235	-3.34016		2	2	2	12.9	12.9	12.9	31.293	0	9.8834	493400000	27	A0A0C4DGS9;Q9Y6K0	A0A0C4DGS9;Q9Y6K0	21.8812	22.0405	22.5565	21.3491	22.3423	21.2697	21.8525	22.8186	22.2184	25.6341	25.6706	26.0998	22.5233	21.9344
sp|P17028|ZNF24_HUMAN Zinc finger protein 24 OS=Homo sapiens OX=9606 GN=ZNF24 PE=1 SV=4;sp|P17028-2|ZNF24_HUMAN Isoform 2 of Zinc finger protein 24 OS=Homo sapiens OX=9606 GN=ZNF24	Zinc finger protein 24	ZNF24	+	5.16774	0	6.16201	+	+	5.00682	0	6.52033	+	+	1.88231	0.0192315	6.21036	+	+	3.98557	0	8.47803	+	24	24	23	72.6	72.6	72.6	42.155	0	323.31	24611000000	306	P17028;P17028-2;K7EPL1;K7EQP8;K7EPZ8	P17028;P17028-2	22.7672	22.5907	23.1246	28.8499	28.8774	29.2412	29.6944	29.175	29.1741	21.8451	20.9345	22.8203	29.4051	29.4576
sp|P12956|XRCC6_HUMAN X-ray repair cross-complementing protein 6 OS=Homo sapiens OX=9606 GN=XRCC6 PE=1 SV=2;tr|B1AHC9|B1AHC9_HUMAN ATP-dependent DNA helicase 2 subunit 1 OS=Homo sapiens OX=9606 GN=XRCC6 PE=1 SV=1;sp|P12956-2|XRCC6_HUMAN Isoform 2 of X-ray	X-ray repair cross-complementing protein 6	XRCC6	+	4.38845	0	6.15286	+	+	5.00742	0	7.15763	+	+	1.90299	0.0226271	2.49178	+	+	3.65092	0	5.77552	+	21	21	21	38.8	38.8	38.8	69.842	0	231	7563800000	175	P12956;B1AHC9;P12956-2	P12956;B1AHC9;P12956-2	21.6085	22.1876	21.3353	28.0952	28.0107	27.4841	28.8729	28.7754	28.9559	22.6984	22.6451	23.949	26.1126	25.8283
sp|O00571|DDX3X_HUMAN ATP-dependent RNA helicase DDX3X OS=Homo sapiens OX=9606 GN=DDX3X PE=1 SV=3;tr|A0A0J9YVQ7|A0A0J9YVQ7_HUMAN ATP-dependent RNA helicase DDX3X (Fragment) OS=Homo sapiens OX=9606 GN=DDX3X PE=1 SV=2;tr|A0A2R8Y645|A0A2R8Y645_HUMAN RNA helic	ATP-dependent RNA helicase DDX3X;ATP-dependent RNA helicase DDX3Y	DDX3X;DDX3Y		NaN	1	0			0.0801532	0.916488	0.0809002			0.0416903	0.955107	-0.0420634			0.236592	0.666232	-0.414465		2	2	2	3.3	3.3	3.3	73.243	0.00062131	3.742	45980000	12	O00571;A0A0J9YVQ7;A0A2R8Y645;A0A2R8Y4A4;A0A2U3TZJ9;A0A2R8YFS5;A0A2R8YFR4;A0A0D9SG12;A0A2R8YCW1;A0A2R8YF78;A0A0D9SFB3;F6S8Q4;A0A2R8Y5G6;A0A2R8Y7T2;A0A2R8YDT5;A0A0D9SF53;O00571-2;A0A2R8YDH3;O15523-2;O15523;A0A087WVZ1	O00571;A0A0J9YVQ7;A0A2R8Y645;A0A2R8Y4A4;A0A2U3TZJ9;A0A2R8YFS5;A0A2R8YFR4;A0A0D9SG12;A0A2R8YCW1;A0A2R8YF78;A0A0D9SFB3;F6S8Q4;A0A2R8Y5G6;A0A2R8Y7T2;A0A2R8YDT5;A0A0D9SF53;O00571-2;A0A2R8YDH3;O15523-2;O15523;A0A087WVZ1	22.3725	21.5634	21.2351	22.2628	22.3582	21.6392	21.9979	21.8076	21.6082	22.0546	21.786	21.2341	21.3702	22.1365
sp|Q9NWF9-1|RN216_HUMAN Isoform 2 of E3 ubiquitin-protein ligase RNF216 OS=Homo sapiens OX=9606 GN=RNF216;sp|Q9NWF9|RN216_HUMAN E3 ubiquitin-protein ligase RNF216 OS=Homo sapiens OX=9606 GN=RNF216 PE=1 SV=3;sp|Q9NWF9-3|RN216_HUMAN Isoform 3 of E3 ubiquitin	E3 ubiquitin-protein ligase RNF216	RNF216	+	3.26523	0.00137838	6.13432	+	+	3.64855	0.000766234	9.55605	+	+	1.95407	0.018246	5.01951	+	+	4.37567	0	11.3501	+	52	52	52	54.3	54.3	54.3	105.88	0	323.31	109100000000	594	Q9NWF9-1;Q9NWF9;Q9NWF9-3;F8W6D1;F8WDI8;Q6NUR6	Q9NWF9-1;Q9NWF9;Q9NWF9-3	23.0077	21.018	21.4319	27.8647	27.9688	28.027	30.894	30.9562	32.2755	20.6801	21.8744	21.9632	27.6867	27.4501
sp|Q99590|SCAFB_HUMAN Protein SCAF11 OS=Homo sapiens OX=9606 GN=SCAF11 PE=1 SV=2;tr|F8VXG7|F8VXG7_HUMAN Protein SCAF11 OS=Homo sapiens OX=9606 GN=SCAF11 PE=1 SV=1;sp|Q99590-2|SCAFB_HUMAN Isoform 2 of Protein SCAF11 OS=Homo sapiens OX=9606 GN=SCAF11;tr|A0A0	Protein SCAF11	SCAF11	+	4.8663	0	6.09048	+	+	4.92421	0	6.04749	+		0.965421	0.112984	3.31271		+	2.67545	0	5.5021	+	26	26	26	26.3	26.3	26.3	164.65	0	131.61	3242300000	86	Q99590;F8VXG7;Q99590-2;A0A0A0MTP7;F8W6K1;A0A087WUE7	Q99590;F8VXG7;Q99590-2;A0A0A0MTP7	20.9651	21.7454	21.3081	27.5374	27.4587	27.294	27.3959	27.4301	27.3352	19.996	22.5219	21.5713	25.7769	26.4079
tr|J3KRE2|J3KRE2_HUMAN Rho GDP-dissociation inhibitor 1 OS=Homo sapiens OX=9606 GN=ARHGDIA PE=1 SV=1;tr|J3KTF8|J3KTF8_HUMAN Rho GDP-dissociation inhibitor 1 (Fragment) OS=Homo sapiens OX=9606 GN=ARHGDIA PE=1 SV=8;tr|J3QQX2|J3QQX2_HUMAN Rho GDP-dissociation	Rho GDP-dissociation inhibitor 1	ARHGDIA	+	5.2692	0	6.05959	+	+	4.17803	0.0005	3.93037	+		0.773895	0.194845	2.94474		+	3.26897	0	3.50526	+	5	5	5	58.1	58.1	58.1	14.814	0	41.503	1199400000	22	J3KRE2;J3KTF8;J3QQX2;P52565;J3KS60;J3KRY1;P52565-2	J3KRE2;J3KTF8;J3QQX2;P52565;J3KS60;J3KRY1;P52565-2	21.137	21.4514	21.6093	27.5847	27.5829	27.2089	25.1707	25.1278	25.6904	21.1961	21.8932	22.3869	26.4649	26.5127
sp|P41161|ETV5_HUMAN ETS translocation variant 5 OS=Homo sapiens OX=9606 GN=ETV5 PE=1 SV=1;sp|P41161-2|ETV5_HUMAN Isoform 2 of ETS translocation variant 5 OS=Homo sapiens OX=9606 GN=ETV5	ETS translocation variant 5	ETV5	+	4.69848	0	6.05401	+	+	4.73453	0	5.60406	+		0.790305	0.198684	1.99629		+	3.71455	0	4.6884	+	11	11	9	30.8	30.8	29	57.837	0	106.94	3418900000	124	P41161;P41161-2;B5MCT2;P50549-4;P50549-5;P50549-6;P50549-3;P50549-2;P50549;C9J5A5;C9J0Z2;C9JMF0;H7C1D2;C9JR66;O95238-2;O95238	P41161;P41161-2	22.1402	22.8645	22.8161	28.8825	28.5137	28.5867	28.2386	28.2367	28.1577	22.2041	22.4664	21.5788	25.2367	25.1939
sp|Q9NW64|RBM22_HUMAN Pre-mRNA-splicing factor RBM22 OS=Homo sapiens OX=9606 GN=RBM22 PE=1 SV=1;sp|Q9NW64-2|RBM22_HUMAN Isoform 2 of Pre-mRNA-splicing factor RBM22 OS=Homo sapiens OX=9606 GN=RBM22;tr|E5RJW4|E5RJW4_HUMAN Pre-mRNA-splicing factor RBM22 (Frag	Pre-mRNA-splicing factor RBM22	RBM22	+	3.69522	0.001	5.99647	+	+	2.95317	0.00116244	4.59628	+	+	1.83045	0.0199087	4.64195	+	+	2.43731	0.000239651	4.05611	+	14	14	14	38.1	38.1	38.1	46.895	0	150.13	2662200000	92	Q9NW64;Q9NW64-2;E5RJW4;E5RHA8	Q9NW64;Q9NW64-2;E5RJW4	22.0558	23.0908	21.5806	28.4738	28.1338	28.109	26.3941	26.661	27.4609	23.7336	21.6753	21.8764	28.1172	27.8599
tr|A0A3B3IT55|A0A3B3IT55_HUMAN KAT8 regulatory NSL complex subunit 1 OS=Homo sapiens OX=9606 GN=KANSL1 PE=1 SV=1;tr|A0A0G2JNB1|A0A0G2JNB1_HUMAN KAT8 regulatory NSL complex subunit 1 OS=Homo sapiens OX=9606 GN=KANSL1 PE=1 SV=1;tr|A0A0G2JQF4|A0A0G2JQF4_HUMAN	KAT8 regulatory NSL complex subunit 1	KANSL1		0.338441	0.516313	-0.866926			0.0106033	0.984929	0.0234598			0.388088	0.528611	-0.879876		+	1.15892	0.0253176	0.546264	+	6	6	6	11.2	11.2	11.2	116.38	0	16.482	560380000	17	A0A3B3IT55;A0A0G2JNB1;A0A0G2JQF4;A0A0G2JNT7;A0A1W2PRB5;A0A0J9YVS1;A0A0G2JQF5;Q7Z3B3;A0A1W2PQT4;A0A1W2PPV8;I3L233;Q7Z3B3-2;Q7Z3B3-4;A0A1W2PS83;A0A1W2PRR3	A0A3B3IT55;A0A0G2JNB1;A0A0G2JQF4;A0A0G2JNT7;A0A1W2PRB5;A0A0J9YVS1;A0A0G2JQF5;Q7Z3B3;A0A1W2PQT4;A0A1W2PPV8;I3L233;Q7Z3B3-2	25.1944	23.0258	24.2474	24.4131	23.8363	21.6174	24.918	23.7427	23.8773	23.3733	23.5585	23.6577	21.6528	21.7444
tr|A0A0U1RR18|A0A0U1RR18_HUMAN Solute carrier family 12 member 7 (Fragment) OS=Homo sapiens OX=9606 GN=SLC12A7 PE=1 SV=1;tr|A0A0G2JNW7|A0A0G2JNW7_HUMAN Solute carrier family 12 member 7 OS=Homo sapiens OX=9606 GN=SLC12A7 PE=1 SV=1;sp|Q9Y666|S12A7_HUMAN Sol	Solute carrier family 12 member 7	SLC12A7		NaN	1	0			NaN	1	0			0.891871	0.156584	-1.81311		+	1.41411	0.00421234	-2.17539		5	5	4	7.2	7.2	5.8	108.93	0	14.31	186590000	17	A0A0U1RR18;A0A0G2JNW7;Q9Y666;A0A0G2JQE3;H0YB78	A0A0U1RR18;A0A0G2JNW7;Q9Y666;A0A0G2JQE3;H0YB78	20.5839	21.5665	21.8703	21.9818	22.4164	21.911	23.1257	22.6446	21.3539	24.57	24.6277	24.6793	24.002	23.4947
sp|P15408|FOSL2_HUMAN Fos-related antigen 2 OS=Homo sapiens OX=9606 GN=FOSL2 PE=1 SV=1;tr|C9JCN8|C9JCN8_HUMAN Fos-related antigen 2 (Fragment) OS=Homo sapiens OX=9606 GN=FOSL2 PE=1 SV=1;sp|P15408-3|FOSL2_HUMAN Isoform 3 of Fos-related antigen 2 OS=Homo sap	Fos-related antigen 2	FOSL2	+	5.71244	0	5.92234	+	+	5.65137	0	6.14667	+	+	2.16303	0.0148931	2.97342	+	+	2.54716	0.00025	3.72583	+	8	8	8	29.1	29.1	29.1	35.193	0	57.63	1571800000	57	P15408;C9JCN8;P15408-3;P15408-2	P15408;C9JCN8;P15408-3;P15408-2	21.1461	21.5171	21.3327	27.0703	27.3354	27.3572	27.3198	27.4318	27.6843	20.4225	22.2504	21.6533	24.4771	24.0121
sp|Q96NC0|ZMAT2_HUMAN Zinc finger matrin-type protein 2 OS=Homo sapiens OX=9606 GN=ZMAT2 PE=1 SV=1;tr|R4GNG8|R4GNG8_HUMAN Zinc finger matrin-type protein 2 (Fragment) OS=Homo sapiens OX=9606 GN=ZMAT2 PE=1 SV=1;tr|R4GMX9|R4GMX9_HUMAN Zinc finger matrin-type	Zinc finger matrin-type protein 2	ZMAT2	+	4.13966	0	5.87879	+	+	3.34888	0.001152	3.93124	+	+	2.96146	0.0139487	4.60009	+	+	3.81999	0	5.96862	+	6	6	6	29.1	29.1	29.1	23.612	0	72.393	2262500000	43	Q96NC0;R4GNG8;R4GMX9	Q96NC0;R4GNG8;R4GMX9	22.4419	21.6286	21.2881	27.5393	27.6913	27.7644	25.5665	25.5834	26.0024	20.0773	21.1519	21.3431	25.7981	25.8741
tr|E9PJ24|E9PJ24_HUMAN PHD and RING finger domain-containing protein 1 OS=Homo sapiens OX=9606 GN=PHRF1 PE=1 SV=1;tr|B7ZM65|B7ZM65_HUMAN PHD and RING finger domain-containing protein 1 OS=Homo sapiens OX=9606 GN=PHRF1 PE=1 SV=1;tr|F8WEF5|F8WEF5_HUMAN PHD a	PHD and RING finger domain-containing protein 1	PHRF1		NaN	1	0			0.50758	0.213151	0.562342		+	1.48955	0.0486224	1.95922	+	+	4.11624	0	8.30412	+	27	27	26	24.3	24.3	23.8	178.22	0	323.31	10300000000	109	E9PJ24;B7ZM65;F8WEF5;A0A0J9YYB5;A0A0J9YWD5;Q9P1Y6-3;Q9P1Y6;A0A0J9YX88;Q9P1Y6-2	E9PJ24;B7ZM65;F8WEF5;A0A0J9YYB5;A0A0J9YWD5;Q9P1Y6-3;Q9P1Y6;A0A0J9YX88;Q9P1Y6-2	22.4077	21.6208	21.5905	22.6892	22.6557	21.3095	23.0468	22.5885	21.6707	20.4488	21.4182	22.1446	23.9921	23.1109
sp|Q13506|NAB1_HUMAN NGFI-A-binding protein 1 OS=Homo sapiens OX=9606 GN=NAB1 PE=1 SV=2;tr|B8ZZS2|B8ZZS2_HUMAN NGFI-A binding protein 1 (EGR1 binding protein 1), isoform CRA_b OS=Homo sapiens OX=9606 GN=NAB1 PE=1 SV=1;sp|Q13506-2|NAB1_HUMAN Isoform Short o	NGFI-A-binding protein 1	NAB1	+	4.61492	0	5.83331	+	+	4.59443	0	6.24495	+		0.754955	0.213371	2.12088		+	4.18031	0	5.40194	+	15	15	14	40.7	40.7	38.8	54.401	0	213.01	3780900000	107	Q13506;B8ZZS2;Q13506-2;H0Y4C5;C9JL92;C9JID4;C9JJ42;C9J3V0;C9JFF6	Q13506;B8ZZS2;Q13506-2;H0Y4C5	21.7176	22.3355	21.4552	27.715	27.6167	27.6765	28.2318	27.8597	28.1516	21.7729	22.775	21.9649	25.6244	25.4658
sp|Q9UQ88-4|CD11A_HUMAN Isoform SV3 of Cyclin-dependent kinase 11A OS=Homo sapiens OX=9606 GN=CDK11A;sp|Q9UQ88-2|CD11A_HUMAN Isoform SV1 of Cyclin-dependent kinase 11A OS=Homo sapiens OX=9606 GN=CDK11A;tr|Q5QPR4|Q5QPR4_HUMAN Cyclin-dependent kinase 11A OS=	Cyclin-dependent kinase 11A	CDK11A	+	3.41521	0.000738462	5.83092	+	+	4.33583	0	8.0294	+	+	1.72772	0.0241138	5.85911	+	+	3.93624	0	9.69644	+	51	51	1	51.2	51.2	2.5	90.044	0	323.31	102270000000	599	Q9UQ88-4;Q9UQ88-2;Q5QPR4;Q5QPR3;Q9UQ88-3;Q9UQ88;Q9UQ88-5;J3KS35;E7ESP2;E9PFJ2	Q9UQ88-4;Q9UQ88-2;Q5QPR4;Q5QPR3;Q9UQ88-3;Q9UQ88;Q9UQ88-5	23.8731	22.6846	22.8164	29.6024	28.9494	28.315	31.1584	30.8098	31.494	22.565	24.2136	22.3255	29.9848	30.6054
sp|Q9UNN8|EPCR_HUMAN Endothelial protein C receptor OS=Homo sapiens OX=9606 GN=PROCR PE=1 SV=1;tr|A0A0U1RQQ4|A0A0U1RQQ4_HUMAN Endothelial protein C receptor (Fragment) OS=Homo sapiens OX=9606 GN=PROCR PE=1 SV=1	Endothelial protein C receptor	PROCR		NaN	1	0			0.183466	0.765929	-0.294587			0.000661547	0.998917	0.000577927			0.574833	0.198336	0.352065		3	3	3	16.4	16.4	16.4	26.671	0	20.696	638080000	20	Q9UNN8;A0A0U1RQQ4;A0A0U1RRC4	Q9UNN8;A0A0U1RQQ4	22.942	22.8874	21.7514	21.741	23.0098	22.2479	21.3922	22.2749	23.03	24.6179	24.2358	24.6993	25.0104	24.2914
sp|Q15287|RNPS1_HUMAN RNA-binding protein with serine-rich domain 1 OS=Homo sapiens OX=9606 GN=RNPS1 PE=1 SV=1;tr|H3BTC0|H3BTC0_HUMAN RNA-binding protein with serine-rich domain 1 (Fragment) OS=Homo sapiens OX=9606 GN=RNPS1 PE=1 SV=1;tr|H3BMM9|H3BMM9_HUMAN	RNA-binding protein with serine-rich domain 1	RNPS1	+	4.49065	0	5.83089	+	+	3.26798	0.00118541	2.45932	+	+	2.14461	0.0149926	5.99632	+	+	3.9533	0	5.49548	+	6	6	6	25.6	25.6	25.6	34.208	0	84.513	3175200000	61	Q15287;H3BTC0;H3BMM9;H3BV80;Q15287-2;Q15287-3;H3BPG5;H3BMS0;H3BNU7;H3BUL0;H3BRK4;H3BTV0;H3BUG0;H3BTR6;H3BP82;H3BNI3;H3BTY0	Q15287;H3BTC0;H3BMM9;H3BV80;Q15287-2;Q15287-3;H3BPG5;H3BMS0	21.5859	21.7825	22.2351	28.0189	27.7641	27.3132	24.3709	24.0496	24.561	22.2198	21.2712	21.037	28.7146	28.5505
tr|A0A0U1RRH9|A0A0U1RRH9_HUMAN Septin-7 (Fragment) OS=Homo sapiens OX=9606 GN=SEPTIN7 PE=1 SV=1;tr|A0A0U1RRE1|A0A0U1RRE1_HUMAN Septin-7 (Fragment) OS=Homo sapiens OX=9606 GN=SEPTIN7 PE=1 SV=1;tr|G3V1Q4|G3V1Q4_HUMAN Septin-7 OS=Homo sapiens OX=9606 GN=SEPTI	Septin-7;Septin-14	SEPT7;SEPT14		NaN	1	0			NaN	1	0			NaN	1	0		+	1.25497	0.0106312	0.924997	+	2	2	2	21.8	21.8	21.8	16.464	0	7.7595	114010000	3	A0A0U1RRH9;A0A0U1RRE1;G3V1Q4;E7ES33;E7EPK1;Q16181-2;Q16181;A0A5F9ZGZ7;Q6ZU15	A0A0U1RRH9;A0A0U1RRE1;G3V1Q4;E7ES33;E7EPK1;Q16181-2;Q16181;A0A5F9ZGZ7;Q6ZU15	22.2288	22.4059	20.459	21.7028	22.0338	22.7072	22.6295	23.0269	22.8812	21.7697	21.5916	22.6701	20.6077	22.4626
sp|Q9H0E3|SP130_HUMAN Histone deacetylase complex subunit SAP130 OS=Homo sapiens OX=9606 GN=SAP130 PE=1 SV=1;sp|Q9H0E3-3|SP130_HUMAN Isoform 3 of Histone deacetylase complex subunit SAP130 OS=Homo sapiens OX=9606 GN=SAP130;tr|H7BXF5|H7BXF5_HUMAN Histone de	Histone deacetylase complex subunit SAP130	SAP130	+	2.58911	0.0039661	5.81319	+	+	2.82778	0.00113372	6.70068	+	+	2.18132	0.0149606	5.90974	+	+	2.73841	0	7.02016	+	18	18	18	24.6	24.6	24.6	110.32	0	323.31	10129000000	178	Q9H0E3;Q9H0E3-3;H7BXF5;A0A2R8YDB8;Q9H0E3-2;C9J683;C9JTJ5	Q9H0E3;Q9H0E3-3;H7BXF5;A0A2R8YDB8	21.152	23.996	21.7833	28.1956	28.2329	27.9424	28.9164	29.0576	29.0594	22.9024	19.9488	22.5994	28.3634	28.385
sp|Q5PSV4|BRM1L_HUMAN Breast cancer metastasis-suppressor 1-like protein OS=Homo sapiens OX=9606 GN=BRMS1L PE=1 SV=2;sp|Q5PSV4-2|BRM1L_HUMAN Isoform 2 of Breast cancer metastasis-suppressor 1-like protein OS=Homo sapiens OX=9606 GN=BRMS1L;tr|H0YHD0|H0YHD0_	Breast cancer metastasis-suppressor 1-like protein	BRMS1L	+	3.49417	0.000813559	5.80879	+	+	2.971	0.0011437	4.14801	+	+	2.77014	0.0129492	4.69825	+	+	3.17327	0	3.66999	+	9	9	9	31	31	31	37.629	0	83.844	1502400000	75	Q5PSV4;Q5PSV4-2;H0YHD0	Q5PSV4;Q5PSV4-2;H0YHD0	21.2344	22.6769	22.6873	28.2632	27.9854	27.7764	26.3718	26.1874	26.4834	21.0845	22.2222	22.2354	27.3292	26.6855
tr|A0A0U1RRM4|A0A0U1RRM4_HUMAN Polypyrimidine tract-binding protein 1 OS=Homo sapiens OX=9606 GN=PTBP1 PE=1 SV=1;sp|P26599|PTBP1_HUMAN Polypyrimidine tract-binding protein 1 OS=Homo sapiens OX=9606 GN=PTBP1 PE=1 SV=1;sp|P26599-2|PTBP1_HUMAN Isoform 2 of Po	Polypyrimidine tract-binding protein 1	PTBP1		0.984722	0.187477	-0.38455			0.156458	0.860792	0.0861282			0.00430172	0.995282	-0.00725428			0.814676	0.112694	-0.306445		17	17	15	43	43	41.7	62.463	0	323.31	9783900000	371	A0A0U1RRM4;P26599;P26599-2;P26599-3;A6NLN1;A0A0D9SF20;K7EKJ7;K7EK45;A0A087WUW5;K7ELW5;K7ES59;A0A087WU68;X6R242	A0A0U1RRM4;P26599;P26599-2;P26599-3;A6NLN1;A0A0D9SF20	28.2813	28.7621	28.8574	28.3195	28.2521	28.1756	28.9254	28.5975	28.6364	28.4555	28.2987	28.4104	27.8666	27.7961
sp|Q8N3Z6|ZCHC7_HUMAN Zinc finger CCHC domain-containing protein 7 OS=Homo sapiens OX=9606 GN=ZCCHC7 PE=1 SV=2	Zinc finger CCHC domain-containing protein 7	ZCCHC7	+	5.02374	0	5.80777	+	+	6.00636	0	5.47907	+	+	1.44152	0.0417596	5.68499	+	+	5.55006	0	8.96136	+	27	27	27	41.6	41.6	41.6	63.052	0	323.31	34914000000	293	Q8N3Z6;X6R4A7;Q8N3Z6-2	Q8N3Z6	23.2209	23.111	23.0217	28.5575	29.2364	28.9829	28.4484	28.5711	28.7714	21.9584	22.2871	22.7035	29.216	30.3665
sp|Q9UKV0-7|HDAC9_HUMAN Isoform 7 of Histone deacetylase 9 OS=Homo sapiens OX=9606 GN=HDAC9;sp|Q9UKV0-4|HDAC9_HUMAN Isoform 4 of Histone deacetylase 9 OS=Homo sapiens OX=9606 GN=HDAC9;sp|Q9UKV0|HDAC9_HUMAN Histone deacetylase 9 OS=Homo sapiens OX=9606 GN=H	Histone deacetylase 9	HDAC9	+	2.052	0.0101392	5.80606	+	+	2.22843	0.00144882	6.41565	+	+	3.56824	0.015218	0.766411		+	3.59582	0	4.28027	+	21	21	0	27.4	27.4	0	117.58	0	323.31	7361600000	176	Q9UKV0-7;Q9UKV0-4;Q9UKV0;Q9UKV0-5;Q9UKV0-2	Q9UKV0-7;Q9UKV0-4;Q9UKV0;Q9UKV0-5;Q9UKV0-2	23.457	21.5211	25.6727	29.4559	29.6684	28.9446	30.05	29.9811	29.8665	22.191	22.2499	22.1141	22.9495	22.866
sp|Q9HC78|ZBT20_HUMAN Zinc finger and BTB domain-containing protein 20 OS=Homo sapiens OX=9606 GN=ZBTB20 PE=1 SV=3;sp|Q9HC78-2|ZBT20_HUMAN Isoform 2 of Zinc finger and BTB domain-containing protein 20 OS=Homo sapiens OX=9606 GN=ZBTB20	Zinc finger and BTB domain-containing protein 20	ZBTB20	+	3.55903	0.000872727	5.80539	+	+	3.70216	0.00100585	5.42804	+	+	4.22328	0.0314286	6.39383	+	+	2.90655	0	3.72215	+	22	22	22	47.1	47.1	47.1	81.082	0	237.26	2889300000	119	Q9HC78;Q9HC78-2;C9JCX0;M0QZ57;Q96K62	Q9HC78;Q9HC78-2	21.2949	20.4018	21.7822	27.3416	27.101	26.4524	26.5958	26.4157	26.7515	21.8199	21.7671	22.4624	28.4181	27.915
tr|A0A182DWI4|A0A182DWI4_HUMAN Selenoprotein S OS=Homo sapiens OX=9606 GN=SELENOS PE=1 SV=1;tr|E9PN30|E9PN30_HUMAN Selenoprotein S (Fragment) OS=Homo sapiens OX=9606 GN=SELENOS PE=1 SV=1;sp|Q9BQE4|SELS_HUMAN Selenoprotein S OS=Homo sapiens OX=9606 GN=SELEN	Selenoprotein S	VIMP		NaN	1	0			NaN	1	0			0.831864	0.26272	-0.540743		+	2.69423	0.000766467	-0.933512		2	2	2	17.5	17.5	17.5	18.494	0	4.433	79329000	8	A0A182DWI4;E9PN30;Q9BQE4	A0A182DWI4;E9PN30;Q9BQE4	22.4567	21.3354	23.734	20.8913	22.2901	22.4446	21.9197	21.5521	22.7545	22.9609	22.9467	23.1065	22.0533	22.2974
sp|Q13123|RED_HUMAN Protein Red OS=Homo sapiens OX=9606 GN=IK PE=1 SV=3;tr|E7EQZ7|E7EQZ7_HUMAN Protein Red (Fragment) OS=Homo sapiens OX=9606 GN=IK PE=1 SV=1	Protein Red	IK	+	3.93868	0	5.77967	+	+	4.50205	0	6.01646	+	+	1.91741	0.0193267	4.67024	+	+	4.40047	0	6.58863	+	20	20	20	44.2	44.2	44.2	65.601	0	249.36	9313700000	153	Q13123;E7EQZ7;D6REL4;D6RAY9;D6RCQ4;A0A0C4DGW5	Q13123;E7EQZ7	21.2877	22.2456	21.5251	27.9087	27.467	27.0217	27.7448	27.7029	27.66	21.9008	22.8769	22.0237	27.9546	27.9744
tr|H0Y488|H0Y488_HUMAN AT-rich interactive domain-containing protein 1A OS=Homo sapiens OX=9606 GN=ARID1A PE=1 SV=2;tr|A0A1B0GTU5|A0A1B0GTU5_HUMAN AT-rich interactive domain-containing protein 1A (Fragment) OS=Homo sapiens OX=9606 GN=ARID1A PE=1 SV=1;sp|O1	AT-rich interactive domain-containing protein 1A	ARID1A		NaN	1	0			NaN	1	0		+	1.65301	0.0389101	-1.7411		+	0.85967	0.0486827	-0.62081		11	4	4	5.5	3.3	3.3	205.83	0	4.6677	109220000	5	H0Y488;A0A1B0GTU5;O14497-3;O14497;O14497-2;A0A087WUV6	H0Y488;A0A1B0GTU5;O14497-3;O14497;O14497-2;A0A087WUV6	21.0801	21.3523	24.3878	21.3256	21.6192	22.4095	23.3274	21.8555	21.9601	23.7201	23.5272	23.6863	20.9639	22.5104
tr|A0A1B0GV23|A0A1B0GV23_HUMAN Cathepsin D OS=Homo sapiens OX=9606 GN=CTSD PE=1 SV=1;tr|A0A1B0GVD5|A0A1B0GVD5_HUMAN Cathepsin D OS=Homo sapiens OX=9606 GN=CTSD PE=1 SV=1;tr|A0A1B0GWE8|A0A1B0GWE8_HUMAN Cathepsin D OS=Homo sapiens OX=9606 GN=CTSD PE=1 SV=1;t	Cathepsin D;Cathepsin D light chain;Cathepsin D heavy chain	CTSD		0.834898	0.120813	-2.1745		+	1.06799	0.015502	-2.64663			0.0981314	0.89546	-0.131416		+	1.06366	0.0250118	0.688854	+	6	6	6	18.7	18.7	18.7	43.831	0	14.015	340010000	12	A0A1B0GV23;A0A1B0GVD5;A0A1B0GWE8;A0A1B0GU92;A0A1B0GU03;P07339;A0A1B0GW44;A0A1B0GVP3;F8W787;F8WD96;C9JH19;H7C469;A0A1B0GV01;H7C1V0;A0A1B0GVF1	A0A1B0GV23;A0A1B0GVD5;A0A1B0GWE8;A0A1B0GU92;A0A1B0GU03;P07339;A0A1B0GW44;A0A1B0GVP3;F8W787;F8WD96;C9JH19;H7C469	26.8406	23.7045	23.1215	21.6796	22.8235	22.6399	21.9519	21.6283	22.1465	23.6296	22.9377	23.8498	24.022	22.6592
sp|O75190|DNJB6_HUMAN DnaJ homolog subfamily B member 6 OS=Homo sapiens OX=9606 GN=DNAJB6 PE=1 SV=2;sp|O75190-3|DNJB6_HUMAN Isoform C of DnaJ homolog subfamily B member 6 OS=Homo sapiens OX=9606 GN=DNAJB6;tr|A0A0J9YX62|A0A0J9YX62_HUMAN DnaJ homolog subfami	DnaJ homolog subfamily B member 6	DNAJB6	+	3.90777	0	5.76918	+	+	3.91294	0.000861314	5.71128	+		0.463249	0.424861	1.60253		+	6.22477	0	4.3911	+	11	11	11	42.9	42.9	42.9	36.087	0	219.13	3314200000	104	O75190;O75190-3;A0A0J9YX62;C9J2C4;O75190-2;E9PH18;O75190-4;F8WCZ4;C9J2P2;C9JDX6;C9JDR7;C9JB42;C9JN01;Q8NHS0;Q8WWF6;P25686-2;C9JRD2;Q7Z6W7;P25686;C9JXB9	O75190;O75190-3;A0A0J9YX62;C9J2C4;O75190-2;E9PH18;O75190-4;F8WCZ4;C9J2P2;C9JDX6	22.1657	21.2303	22.4644	27.9655	27.64	27.5625	27.718	27.8162	27.4601	22.5378	22.7449	22.7293	25.943	25.5835
sp|Q9Y265|RUVB1_HUMAN RuvB-like 1 OS=Homo sapiens OX=9606 GN=RUVBL1 PE=1 SV=1;sp|Q9Y265-2|RUVB1_HUMAN Isoform 2 of RuvB-like 1 OS=Homo sapiens OX=9606 GN=RUVBL1;tr|E7ETR0|E7ETR0_HUMAN RuvB-like helicase OS=Homo sapiens OX=9606 GN=RUVBL1 PE=1 SV=1;tr|H7C4G5	RuvB-like 1	RUVBL1	+	4.32328	0	5.76388	+	+	4.25994	0	5.35881	+	+	2.533	0.013679	4.87003	+	+	4.75144	0	5.37409	+	17	17	17	49.3	49.3	49.3	50.227	0	279.74	4510300000	168	Q9Y265;Q9Y265-2;E7ETR0;H7C4G5;J3QLR1;H7C4I3	Q9Y265;Q9Y265-2;E7ETR0;H7C4G5	21.8266	22.8351	22.2077	28.2311	27.954	27.9759	27.5782	27.7019	27.6658	21.9353	22.2916	21.7787	27.7558	27.4506
sp|P18583-2|SON_HUMAN Isoform A of Protein SON OS=Homo sapiens OX=9606 GN=SON;sp|P18583-5|SON_HUMAN Isoform D of Protein SON OS=Homo sapiens OX=9606 GN=SON;sp|P18583-7|SON_HUMAN Isoform G of Protein SON OS=Homo sapiens OX=9606 GN=SON;sp|P18583|SON_HUMAN Pr	Protein SON	SON	+	2.2849	0.00510105	5.74285	+	+	1.9747	0.00230769	4.53111	+	+	2.14065	0.0146667	5.86441	+	+	2.69006	0	4.953	+	33	33	33	24.6	24.6	24.6	232.3	0	254.73	5126500000	193	P18583-2;P18583-5;P18583-7;P18583;P18583-9;P18583-10;P18583-4;P18583-3;H7C1M2;P18583-6;J3QSZ5;P18583-8;H7C2G8;H7C1S4;H7C257	P18583-2;P18583-5;P18583-7;P18583;P18583-9;P18583-10;P18583-4;P18583-3;H7C1M2;P18583-6	20.9555	23.1074	24.364	29.1314	28.2678	28.2563	27.5404	27.1785	27.3013	21.9629	20.9321	23.3193	29.2608	28.4119
tr|A0A1W2PNR9|A0A1W2PNR9_HUMAN Immediate early response 3-interacting protein 1 OS=Homo sapiens OX=9606 GN=IER3IP1 PE=1 SV=1;sp|Q9Y5U9|IR3IP_HUMAN Immediate early response 3-interacting protein 1 OS=Homo sapiens OX=9606 GN=IER3IP1 PE=1 SV=1	Immediate early response 3-interacting protein 1	IER3IP1		NaN	1	0			0.394707	0.294003	0.99367			0.347075	0.620406	0.390156		+	1.93543	0.00108642	-2.98834		2	2	2	40.6	40.6	40.6	7.6079	0	108.33	618680000	23	A0A1W2PNR9;Q9Y5U9	A0A1W2PNR9;Q9Y5U9	22.0421	21.7732	23.8323	21.6907	21.9626	21.4241	21.8538	24.3848	24.39	24.681	24.4399	24.646	24.5394	24.4991
tr|A0A1W2PNZ9|A0A1W2PNZ9_HUMAN Probable JmjC domain-containing histone demethylation protein 2C OS=Homo sapiens OX=9606 GN=JMJD1C PE=1 SV=1;sp|Q15652-3|JHD2C_HUMAN Isoform 3 of Probable JmjC domain-containing histone demethylation protein 2C OS=Homo sapien	Probable JmjC domain-containing histone demethylation protein 2C	JMJD1C	+	2.07918	0.0254987	-0.836215		+	2.07233	0.00428751	-0.896634			0.545416	0.471548	-0.363728			0.548863	0.770611	-0.0620581		51	51	12	31.5	31.5	7.7	263.14	0	323.31	11980000000	401	A0A1W2PNZ9;Q15652-3;Q15652;H7BXU7	A0A1W2PNZ9;Q15652-3;Q15652	29.1954	29.1727	29.5609	28.5132	28.6548	28.2524	28.3284	28.6802	28.2305	28.8948	28.8308	28.9029	28.1603	28.2808
sp|P82979|SARNP_HUMAN SAP domain-containing ribonucleoprotein OS=Homo sapiens OX=9606 GN=SARNP PE=1 SV=3;tr|F8VZQ9|F8VZQ9_HUMAN SAP domain-containing ribonucleoprotein OS=Homo sapiens OX=9606 GN=SARNP PE=1 SV=1;tr|H0YHG0|H0YHG0_HUMAN Uncharacterized protei	SAP domain-containing ribonucleoprotein	SARNP	+	3.3525	0.000685714	5.7372	+	+	3.27647	0.000962963	5.41238	+	+	2.68953	0.0110725	3.72677	+	+	0.742141	0.0404187	1.95225	+	7	7	7	39.5	39.5	39.5	23.671	0	22.363	1311800000	42	P82979;F8VZQ9;H0YHG0;F8VS12	P82979;F8VZQ9;H0YHG0	21.5158	21.0021	22.7409	27.738	27.1917	27.5407	26.9707	27.1033	27.422	22.1769	21.7092	22.7821	26.4047	26.3338
tr|F5H2X7|F5H2X7_HUMAN Cip1-interacting zinc finger protein OS=Homo sapiens OX=9606 GN=CIZ1 PE=1 SV=2;sp|Q9ULV3-5|CIZ1_HUMAN Isoform 5 of Cip1-interacting zinc finger protein OS=Homo sapiens OX=9606 GN=CIZ1;sp|Q9ULV3|CIZ1_HUMAN Cip1-interacting zinc finger	Cip1-interacting zinc finger protein	CIZ1	+	4.41367	0	5.72193	+	+	5.60301	0	5.9693	+		0.791598	0.206277	1.61201		+	2.32482	0.000325397	3.03886	+	16	16	16	25.4	25.4	25.4	106.3	0	105.01	2247800000	52	F5H2X7;Q9ULV3-5;Q9ULV3;H0Y5D5;Q9ULV3-2;Q9BTG3;Q5SYW2;Q9ULV3-3;Q9ULV3-4;A0A494C0L7;A0A0U1RQR2;F6VD24	F5H2X7;Q9ULV3-5;Q9ULV3;H0Y5D5;Q9ULV3-2;Q9BTG3;Q5SYW2;Q9ULV3-3;Q9ULV3-4;A0A494C0L7	21.6602	21.6314	21.3047	27.6821	27.3134	26.7666	27.7007	27.3853	27.4182	21.0694	22.7676	21.3411	24.294	23.9252
tr|A0A1W2PPC6|A0A1W2PPC6_HUMAN GlcNAc-1-P transferase OS=Homo sapiens OX=9606 GN=DPAGT1 PE=1 SV=1;sp|Q9H3H5-2|GPT_HUMAN Isoform 2 of UDP-N-acetylglucosamine--dolichyl-phosphate N-acetylglucosaminephosphotransferase OS=Homo sapiens OX=9606 GN=DPAGT1;sp|Q9H3	UDP-N-acetylglucosamine--dolichyl-phosphate N-acetylglucosaminephosphotransferase	DPAGT1		NaN	1	0			NaN	1	0			1.01019	0.228079	-0.46782		+	1.20502	0.00831829	-1.54489		2	2	2	5	5	5	42.587	0.00091213	3.4277	178180000	14	A0A1W2PPC6;Q9H3H5-2;Q9H3H5;F8W681;A0A1W2PQD1;F8WE55;A0A1W2PRR6;A0A1W2PQH0;Q9H3H5-3	A0A1W2PPC6;Q9H3H5-2;Q9H3H5;F8W681;A0A1W2PQD1;F8WE55;A0A1W2PRR6;A0A1W2PQH0;Q9H3H5-3	22.9215	23.1884	21.8534	22.6222	22.6586	21.9348	23.8112	21.3249	22.5915	24.4818	23.795	24.1803	23.8532	23.6432
sp|P43243|MATR3_HUMAN Matrin-3 OS=Homo sapiens OX=9606 GN=MATR3 PE=1 SV=2;tr|A0A0R4J2E8|A0A0R4J2E8_HUMAN Matrin-3 OS=Homo sapiens OX=9606 GN=MATR3 PE=1 SV=1;tr|A8MXP9|A8MXP9_HUMAN Matrin-3 OS=Homo sapiens OX=9606 GN=MATR3 PE=1 SV=1;tr|D6REM6|D6REM6_HUMAN M	Matrin-3	MATR3	+	3.22724	0.00203922	5.68187	+	+	3.2819	0.000981132	5.888	+	+	2.37023	0.0141277	6.91766	+	+	3.79447	0	7.71351	+	44	44	44	64.9	64.9	64.9	94.622	0	323.31	39944000000	538	P43243;A0A0R4J2E8;A8MXP9;D6REM6;D6R991;H0Y8T4;P43243-2;B3KM87;Q68E03;D6RBK5;D6RCM3;D6REK4;D6R8Z5;D6RIA2;D6RB45;A0A1B0GX04;D6RE02;D6RBS2;D6R9F3;D6RBI2;D6RAY2;D6RAM9	P43243;A0A0R4J2E8;A8MXP9;D6REM6;D6R991	24.3621	26.1119	26.0056	31.3109	31.2456	30.9686	31.333	31.2115	31.599	24.2382	23.1041	22.3154	30.6663	31.6194
tr|G3V529|G3V529_HUMAN RNA helicase OS=Homo sapiens OX=9606 GN=DDX24 PE=1 SV=1;sp|Q9GZR7|DDX24_HUMAN ATP-dependent RNA helicase DDX24 OS=Homo sapiens OX=9606 GN=DDX24 PE=1 SV=1;sp|Q9GZR7-2|DDX24_HUMAN Isoform 2 of ATP-dependent RNA helicase DDX24 OS=Homo s	ATP-dependent RNA helicase DDX24	DDX24	+	3.19234	0.00198726	5.66119	+	+	3.77597	0.000810997	7.00376	+		0.778503	0.198033	2.38901		+	2.17984	0.000409756	5.11116	+	35	35	35	54.5	54.5	54.5	91.48	0	323.31	9292900000	238	G3V529;Q9GZR7;Q9GZR7-2;F5GYL3;A0A1W2PRR2;A0A087WXU8	G3V529;Q9GZR7;Q9GZR7-2;F5GYL3;A0A1W2PRR2;A0A087WXU8	21.8475	23.071	21.3685	27.9704	27.1756	28.1246	29.1152	28.9484	29.2346	23.8211	21.7664	25.1135	27.2636	26.6705
tr|A0A0G2JIW1|A0A0G2JIW1_HUMAN Heat shock 70 kDa protein 1B OS=Homo sapiens OX=9606 GN=HSPA1B PE=1 SV=1;sp|P0DMV9|HS71B_HUMAN Heat shock 70 kDa protein 1B OS=Homo sapiens OX=9606 GN=HSPA1B PE=1 SV=1;sp|P0DMV8|HS71A_HUMAN Heat shock 70 kDa protein 1A OS=Hom	Heat shock 70 kDa protein 1B;Heat shock 70 kDa protein 1A	HSPA1B;HSPA1A	+	3.46241	0.000774194	5.65059	+	+	3.96898	0.000571429	7.50013	+	+	2.35004	0.0135701	4.19492	+	+	3.98381	0	7.28153	+	31	26	16	60.9	53.9	39.9	70.108	0	323.31	13763000000	206	A0A0G2JIW1;P0DMV9;P0DMV8;P0DMV8-2;V9GZ37	A0A0G2JIW1;P0DMV9;P0DMV8;P0DMV8-2;V9GZ37	21.6803	21.6797	20.246	27.1277	26.6626	26.7675	28.8746	28.4876	28.7442	22.3134	23.1433	21.651	27.198	27.0975
tr|A0A1W2PS24|A0A1W2PS24_HUMAN HLA class I histocompatibility antigen, A alpha chain OS=Homo sapiens OX=9606 GN=HLA-A PE=1 SV=1;tr|Q5SRN7|Q5SRN7_HUMAN HLA class I histocompatibility antigen, A alpha chain OS=Homo sapiens OX=9606 GN=HLA-A PE=1 SV=2;tr|Q5SRN	HLA class I histocompatibility antigen, A-3 alpha chain	HLA-A		NaN	1	0			0.258048	0.62507	0.426978			0.258109	0.711281	0.348673		+	2.91391	0.000339193	1.3075	+	9	4	1	41.2	18.2	4	36.784	0	66.036	878860000	18	A0A1W2PS24;Q5SRN7;Q5SRN5;P04439;P04439-2;A0A0G2JL56;A0A0G2JIF2;A0A1W2PSE7;Q5SUL5;A0A0G2JI36;A0A1W2PQD0;A0A0G2JH66;A0A140T9B7;P17693-6;A0A0G2JPA3;D0EV57;A0A140T9V0;A0A140T9W3;A0A140T8X0;A0A140T9W7;P17693-2;A0A0G2JNX1;Q31611;A0A140T939;A0A140T9C2;A0A140T9D9;A0A140T9X6	A0A1W2PS24;Q5SRN7;Q5SRN5;P04439;P04439-2;A0A0G2JL56;A0A0G2JIF2;A0A1W2PSE7;Q5SUL5;A0A0G2JI36;A0A1W2PQD0	22.0448	22.2763	22.978	23.1493	22.6854	22.0085	22.5805	21.9968	24.0026	24.1886	24.3419	23.9288	24.0006	23.9555
tr|H7C5C6|H7C5C6_HUMAN Stromal interaction molecule 2 OS=Homo sapiens OX=9606 GN=STIM2 PE=1 SV=2;tr|H7C5A5|H7C5A5_HUMAN Stromal interaction molecule 2 OS=Homo sapiens OX=9606 GN=STIM2 PE=1 SV=1;tr|A0A1X7SBY3|A0A1X7SBY3_HUMAN Stromal interaction molecule 2	Stromal interaction molecule 2	STIM2		NaN	1	0			NaN	1	0			0.310497	0.631809	0.549904			0.0355922	0.954378	0.0963643		6	5	5	12	9.2	9.2	66.1	0	10.804	213190000	7	H7C5C6;H7C5A5;A0A1X7SBY3;H0Y860;Q9P246-3;Q9P246;Q9P246-2;H7C5K2;R4GNC5;R4GN82;R4GMP0	H7C5C6;H7C5A5;A0A1X7SBY3;H0Y860;Q9P246-3;Q9P246;Q9P246-2	22.0026	22.5183	23.0239	22.0583	22.7499	22.5527	21.159	22.1637	21.6934	21.6819	23.237	22.9087	22.3896	22.8716
tr|A0A1X7SBZ2|A0A1X7SBZ2_HUMAN RNA helicase OS=Homo sapiens OX=9606 GN=DDX17 PE=1 SV=1;tr|A0A5H1ZRQ2|A0A5H1ZRQ2_HUMAN RNA helicase OS=Homo sapiens OX=9606 GN=DDX17 PE=1 SV=1;sp|Q92841-1|DDX17_HUMAN Isoform 2 of Probable ATP-dependent RNA helicase DDX17 OS=	Probable ATP-dependent RNA helicase DDX17	DDX17		0.328535	0.524212	-1.02678			0.633033	0.11774	0.687816		+	1.98571	0.0196181	3.29461	+	+	2.64426	0.00025731	3.46105	+	19	13	13	31.6	24.4	24.4	80.253	0	73.416	1203100000	14	A0A1X7SBZ2;A0A5H1ZRQ2;Q92841-1;Q92841-3;Q92841;Q92841-2;A0A0U1RQJ0	A0A1X7SBZ2;A0A5H1ZRQ2;Q92841-1;Q92841-3;Q92841;Q92841-2	24.686	23.292	24.697	25.5801	21.7771	22.2375	24.8858	25.1827	24.6699	21.8568	23.0258	21.5015	26.1157	25.8308
sp|Q96B23-2|CR025_HUMAN Isoform 2 of Uncharacterized protein C18orf25 OS=Homo sapiens OX=9606 GN=C18orf25	Uncharacterized protein C18orf25	C18orf25	+	4.35328	0	5.64962	+	+	5.07622	0	8.24127	+		0.812305	0.18776	1.96833		+	3.09573	0	6.42907	+	12	12	1	43.1	43.1	5.5	37.048	0	323.31	12384000000	108	Q96B23-2	Q96B23-2	21.68	21.9737	22.6396	27.9139	27.6534	27.6749	30.3524	30.3367	30.328	20.7302	22.9112	22.5149	25.7675	23.5123
sp|Q9UPN9|TRI33_HUMAN E3 ubiquitin-protein ligase TRIM33 OS=Homo sapiens OX=9606 GN=TRIM33 PE=1 SV=3;tr|H0Y612|H0Y612_HUMAN E3 ubiquitin-protein ligase TRIM33 (Fragment) OS=Homo sapiens OX=9606 GN=TRIM33 PE=1 SV=1	E3 ubiquitin-protein ligase TRIM33	TRIM33	+	3.30226	0.00141667	5.63127	+	+	3.84338	0.000494208	7.51788	+		1.20401	0.0650106	3.99046		+	2.11866	0.000400381	6.13373	+	35	35	1	39	39	1.2	122.53	0	323.31	17418000000	283	Q9UPN9;H0Y612	Q9UPN9;H0Y612	21.1244	22.7235	22.5887	28.1441	27.5122	27.674	29.3992	29.7342	29.8569	23.1465	25.797	21.6367	28.6394	28.3342
sp|Q8ND82|Z280C_HUMAN Zinc finger protein 280C OS=Homo sapiens OX=9606 GN=ZNF280C PE=1 SV=1;tr|Q9UJJ2|Q9UJJ2_HUMAN Zinc finger protein 280C (Fragment) OS=Homo sapiens OX=9606 GN=ZNF280C PE=1 SV=1	Zinc finger protein 280C	ZNF280C	+	5.68914	0	5.56495	+	+	4.56037	0	6.36177	+	+	1.46764	0.0406	5.04649	+	+	4.13235	0	5.75458	+	37	37	33	65.3	65.3	60.7	83.095	0	323.31	33495000000	471	Q8ND82;Q9UJJ2	Q8ND82;Q9UJJ2	24.2087	24.0696	23.7747	29.5433	29.5382	29.6663	30.2315	30.0103	30.8966	23.9472	25.1212	24.6194	31.3175	31.0128
sp|Q8NF99|ZN397_HUMAN Zinc finger protein 397 OS=Homo sapiens OX=9606 GN=ZNF397 PE=1 SV=2	Zinc finger protein 397	ZNF397	+	4.18902	0	5.54156	+	+	3.75884	0.00102687	5.19293	+	+	1.87954	0.0189515	5.3546	+	+	2.89072	0	4.66519	+	24	21	18	51.5	48.7	41.6	61.138	0	288.01	13771000000	315	Q8NF99;Q8NF99-2;K7ERU5;Q96K65;Q8NF99-3;M0R288;K7EIM5	Q8NF99	24.7579	24.154	25.1002	30.4721	29.922	30.2427	29.3512	30.2519	29.9878	22.6916	23.9156	24.292	30.6035	29.633
tr|F5H777|F5H777_HUMAN Coiled-coil domain-containing protein 82 (Fragment) OS=Homo sapiens OX=9606 GN=CCDC82 PE=1 SV=1;tr|A0A2R8Y4L3|A0A2R8Y4L3_HUMAN Coiled-coil domain-containing protein 82 OS=Homo sapiens OX=9606 GN=CCDC82 PE=1 SV=1;tr|A0A2R8YE98|A0A2R8Y	Coiled-coil domain-containing protein 82	CCDC82		NaN	1	0			0.27239	0.608652	-0.384332			NaN	1	0		+	2.69758	0.000336066	1.63533	+	3	3	3	17.2	17.2	17.2	30.485	0	38.145	327530000	12	F5H777;A0A2R8Y4L3;A0A2R8YE98;A0A2R8Y7C3;Q8N4S0-2;Q8N4S0	F5H777;A0A2R8Y4L3;A0A2R8YE98;A0A2R8Y7C3;Q8N4S0-2;Q8N4S0	23.3548	22.1721	23.0435	21.776	22.1637	22.1251	23.337	22.1929	21.8876	22.6341	22.4409	23.0272	21.1663	21.3947
sp|P49639|HXA1_HUMAN Homeobox protein Hox-A1 OS=Homo sapiens OX=9606 GN=HOXA1 PE=1 SV=2;tr|A0A2R8Y4R9|A0A2R8Y4R9_HUMAN Homeobox protein Hox-A1 OS=Homo sapiens OX=9606 GN=HOXA1 PE=1 SV=1	Homeobox protein Hox-A1	HOXA1	+	2.25406	0.0328392	-0.546654			0.919153	0.0993953	-0.332531			0.9528	0.121387	-2.5845		+	2.33866	0.00234055	-0.664096		7	6	6	31.9	29.9	29.9	36.641	0	183.26	2569500000	66	P49639;A0A2R8Y4R9;P49639-3;P14653;Q9GZZ0;P49639-2;E7ERT8;H0YIA6;A0A0A0MTF4;F8VXG1;A0A087WVU3;A0A0A0MSX5;P52952;A6NCS4;Q9UD57;Q9BZM3;P31277;P31270;Q00056;Q8TAU0;Q9NP08;P78367;P13378;C9K088;P50219;Q6ZNG2;P17483;P13378-3;P13378-2;Q99801;Q99801-3;Q99801-4;Q99801-2;P50219-2;H0YHX3;O60479;Q99801-5;P09016;P09017;Q9H4S2;P35548;P35452;P31275;P52945;A6NMT0;Q15270	P49639;A0A2R8Y4R9	25.9777	25.8865	26.1927	25.5325	25.3879	25.4965	25.7095	25.921	25.4288	27.2571	27.3035	27.5891	26.3243	25.7845
tr|H3BV07|H3BV07_HUMAN TBC1 domain family member 24 (Fragment) OS=Homo sapiens OX=9606 GN=TBC1D24 PE=1 SV=9;tr|A0A2R8Y518|A0A2R8Y518_HUMAN TBC1 domain family member 24 (Fragment) OS=Homo sapiens OX=9606 GN=TBC1D24 PE=1 SV=1;sp|Q9ULP9-2|TBC24_HUMAN Isoform	TBC1 domain family member 24	TBC1D24		NaN	1	0			NaN	1	0			0.541056	0.409116	-0.64291		+	1.01632	0.0135454	-1.80567		5	5	5	13.4	13.4	13.4	51.956	0	9.5638	240530000	12	H3BV07;A0A2R8Y518;Q9ULP9-2;Q9ULP9;A0A0D9SFR5;H3BQ06	H3BV07;A0A2R8Y518;Q9ULP9-2;Q9ULP9;A0A0D9SFR5;H3BQ06	21.6034	22.9393	22.943	23.0457	21.6186	22.4091	22.1372	21.7037	21.4305	24.1311	23.9006	23.7116	23.7915	23.7724
tr|A0A2R8YDM9|A0A2R8YDM9_HUMAN Ataxin-2 OS=Homo sapiens OX=9606 GN=ATXN2 PE=1 SV=1;tr|A0A2R8Y5A6|A0A2R8Y5A6_HUMAN Ataxin-2 OS=Homo sapiens OX=9606 GN=ATXN2 PE=1 SV=1		ATXN2		1.06427	0.179753	-0.358212		+	1.20093	0.0318301	-0.522807		+	1.68158	0.0484987	-1.07689		+	3.10949	0.000240175	-1.26483		36	36	1	52	52	0.8	105.13	0	323.31	38524000000	820	A0A2R8YDM9;A0A2R8Y5A6;A0A2R8Y6W7;A0A2R8YGV1	A0A2R8YDM9;A0A2R8Y5A6	30.5571	30.8474	31.0696	30.3639	30.5511	30.4845	30.2225	30.5757	30.1075	31.2193	31.1627	31.5297	30.4076	30.5732
sp|P23497-4|SP100_HUMAN Isoform Sp100-C of Nuclear autoantigen Sp-100 OS=Homo sapiens OX=9606 GN=SP100	Nuclear autoantigen Sp-100	SP100	+	2.644	0.00363158	5.49963	+	+	2.98739	0.00129784	6.77273	+	+	5.18357	0	10.4763	+	+	6.1646	0	10.3753	+	48	48	4	53.2	53.2	4.5	101.57	0	323.31	198270000000	1075	P23497-4;H0Y4R8;Q9HB58-6	P23497-4	28.4275	25.8713	26.2954	32.4746	32.2822	32.3364	33.6174	33.7341	33.5609	22.5066	22.7866	22.2304	33.1338	32.4081
tr|A0A2R8Y6G6|A0A2R8Y6G6_HUMAN 2-phospho-D-glycerate hydro-lyase OS=Homo sapiens OX=9606 GN=ENO1 PE=1 SV=1;sp|P06733|ENOA_HUMAN Alpha-enolase OS=Homo sapiens OX=9606 GN=ENO1 PE=1 SV=2;sp|P06733-2|ENOA_HUMAN Isoform MBP-1 of Alpha-enolase OS=Homo sapiens OX	Alpha-enolase	ENO1		0.0156444	0.982705	-0.0109965			0.551824	0.278058	-0.290448			0.199282	0.82052	0.124324		+	3.99177	0	1.77224	+	17	17	17	56.7	56.7	56.7	47.327	0	323.31	5631200000	154	A0A2R8Y6G6;P06733;P06733-2;K7EM90;A0A2R8YEM5;A0A2R8Y879;A0A2R8Y798;K7ERS8;A0A2R8YEG5	A0A2R8Y6G6;P06733;P06733-2	27.1691	26.5708	26.4852	26.5546	26.8463	26.7913	26.6234	26.4085	26.3219	26.1582	26.2604	26.391	26.4504	26.7623
tr|B8ZZN6|B8ZZN6_HUMAN Small ubiquitin-related modifier 1 OS=Homo sapiens OX=9606 GN=SUMO1 PE=1 SV=1;sp|P63165|SUMO1_HUMAN Small ubiquitin-related modifier 1 OS=Homo sapiens OX=9606 GN=SUMO1 PE=1 SV=1;tr|B8ZZJ0|B8ZZJ0_HUMAN Small ubiquitin-related modifier	Small ubiquitin-related modifier 1	SUMO1	+	5.47952	0	5.49176	+	+	5.49569	0	6.84165	+	+	6.37517	0	6.28736	+	+	6.37567	0	8.29538	+	12	12	12	44.5	44.5	44.5	16.645	0	323.31	411290000000	392	B8ZZN6;P63165;B8ZZJ0;B9A032;B8ZZ67;P63165-2;G2XKQ0	B8ZZN6;P63165;B8ZZJ0;B9A032	28.2374	28.3541	27.8663	33.6584	33.5883	33.6864	34.9834	35.194	34.8054	25.9028	25.8203	25.7444	31.9751	32.0696
sp|Q6P4R8-3|NFRKB_HUMAN Isoform 3 of Nuclear factor related to kappa-B-binding protein OS=Homo sapiens OX=9606 GN=NFRKB;sp|Q6P4R8|NFRKB_HUMAN Nuclear factor related to kappa-B-binding protein OS=Homo sapiens OX=9606 GN=NFRKB PE=1 SV=2;sp|Q6P4R8-2|NFRKB_HUM	Nuclear factor related to kappa-B-binding protein	NFRKB	+	4.15816	0	5.48839	+	+	5.06545	0	7.273	+	+	2.27691	0.0151933	4.52551	+	+	3.86547	0	6.96477	+	35	35	35	40.4	40.4	40.4	138.87	0	323.31	13022000000	183	Q6P4R8-3;Q6P4R8;Q6P4R8-2;E9PQ59;E9PJG2;E9PJU3;E9PJE1;E9PM88;E9PQB0	Q6P4R8-3;Q6P4R8;Q6P4R8-2;E9PQ59	21.6824	22.3426	22.1725	28.0394	27.4421	27.1813	29.6418	29.1209	29.2539	21.2528	22.5759	22.7879	27.6627	27.0893
tr|A0A2R8Y7P6|A0A2R8Y7P6_HUMAN Ataxin-2 OS=Homo sapiens OX=9606 GN=ATXN2 PE=1 SV=1;tr|V9GY86|V9GY86_HUMAN Ataxin-2 OS=Homo sapiens OX=9606 GN=ATXN2 PE=1 SV=1;tr|A0A5F9ZHW5|A0A5F9ZHW5_HUMAN Ataxin-2 OS=Homo sapiens OX=9606 GN=ATXN2 PE=1 SV=1;sp|Q99700-4|ATX	Ataxin-2	ATXN2		0.650493	0.205765	-1.36315		+	0.792164	0.0434903	-2.03801		+	2.61095	0.0149213	-3.00878		+	1.70335	0.00186844	-2.3646		36	1	0	52.7	0.9	0	103.71	0.0055866	2.3841	161910000	5	A0A2R8Y7P6;V9GY86;A0A5F9ZHW5;Q99700-4;Q99700;H0YH87;Q99700-2;A0A5F9ZHH4;F8VQP2;Q99700-5;F8W0B5;A0A5F9ZH85;A0A5F9ZHG6	A0A2R8Y7P6;V9GY86;A0A5F9ZHW5;Q99700-4;Q99700;H0YH87;Q99700-2;A0A5F9ZHH4;F8VQP2;Q99700-5;F8W0B5	24.5467	25.0053	21.9804	22.394	22.6967	22.3523	23.2556	21.0925	21.0704	24.5301	24.8723	24.7854	20.8591	22.1479
sp|Q8NC51-4|PAIRB_HUMAN Isoform 4 of Plasminogen activator inhibitor 1 RNA-binding protein OS=Homo sapiens OX=9606 GN=SERBP1;sp|Q8NC51-3|PAIRB_HUMAN Isoform 3 of Plasminogen activator inhibitor 1 RNA-binding protein OS=Homo sapiens OX=9606 GN=SERBP1;sp|Q8N	Plasminogen activator inhibitor 1 RNA-binding protein	SERBP1	+	3.99258	0	5.46992	+	+	3.22364	0.00114875	2.47541	+		0.988271	0.107049	3.22087		+	1.46341	0.0039004	2.03387	+	7	7	7	31	31	31	42.426	0	110.76	686090000	46	Q8NC51-4;Q8NC51-3;Q8NC51-2;Q8NC51	Q8NC51-4;Q8NC51-3;Q8NC51-2;Q8NC51	21.8254	22.3713	22.6862	27.468	27.567	28.2576	24.7773	24.7612	24.7707	22.8321	20.7525	22.4457	26.3549	26.8676
sp|Q7Z5L9|I2BP2_HUMAN Interferon regulatory factor 2-binding protein 2 OS=Homo sapiens OX=9606 GN=IRF2BP2 PE=1 SV=2;sp|Q7Z5L9-2|I2BP2_HUMAN Isoform 2 of Interferon regulatory factor 2-binding protein 2 OS=Homo sapiens OX=9606 GN=IRF2BP2	Interferon regulatory factor 2-binding protein 2	IRF2BP2	+	3.78673	0.00104348	5.44376	+	+	3.47294	0.00103311	4.36145	+		0.71065	0.236778	1.92755		+	2.358	0.000410557	2.52973	+	12	12	10	32.2	32.2	29.3	61.024	0	47.707	934650000	45	Q7Z5L9;Q7Z5L9-2;Q7Z5L9-3	Q7Z5L9;Q7Z5L9-2	20.8771	22.0962	21.891	27.2266	27.1473	26.8215	25.9593	26.1035	25.8859	21.6705	22.8117	22.9228	25.7001	25.4312
sp|O95125|ZN202_HUMAN Zinc finger protein 202 OS=Homo sapiens OX=9606 GN=ZNF202 PE=1 SV=4;sp|O95125-2|ZN202_HUMAN Isoform Alpha of Zinc finger protein 202 OS=Homo sapiens OX=9606 GN=ZNF202	Zinc finger protein 202	ZNF202	+	2.82642	0.0030099	5.39	+	+	2.68913	0.00109774	4.47496	+	+	1.75171	0.0261846	3.41459	+	+	3.12716	0	2.58541	+	22	22	22	40	40	40	74.72	0	323.31	8859300000	181	O95125;O95125-2;E9PM99;A0PJY2-2;A0PJY2-3;A0PJY2	O95125;O95125-2	22.5418	24.2505	24.3505	29.8277	28.8971	28.5879	27.8876	28.0572	28.6228	25.4969	25.059	25.2398	29.8089	29.2593
sp|Q9UKL0|RCOR1_HUMAN REST corepressor 1 OS=Homo sapiens OX=9606 GN=RCOR1 PE=1 SV=2	REST corepressor 1	RCOR1	+	3.51747	0.000806723	5.38864	+	+	3.61878	0.000914894	5.29897	+	+	2.2762	0.0147826	4.69671	+	+	2.8065	0	4.6622	+	14	14	9	36.3	36.3	24.7	53.327	0	106.62	3461100000	106	Q9UKL0	Q9UKL0	21.7452	22.0828	23.0915	27.988	27.8313	27.2661	27.6015	27.3746	27.8403	21.0372	23.064	22.4446	27.5916	27.3706
sp|O60832|DKC1_HUMAN H/ACA ribonucleoprotein complex subunit DKC1 OS=Homo sapiens OX=9606 GN=DKC1 PE=1 SV=3;sp|O60832-2|DKC1_HUMAN Isoform 3 of H/ACA ribonucleoprotein complex subunit DKC1 OS=Homo sapiens OX=9606 GN=DKC1;tr|C9IYT0|C9IYT0_HUMAN H/ACA ribonu	H/ACA ribonucleoprotein complex subunit 4	DKC1	+	4.91618	0	5.36102	+	+	5.04651	0	6.00004	+	+	2.21433	0.0145299	7.02795	+	+	4.40359	0	6.7046	+	32	32	32	51.9	51.9	51.9	57.673	0	276.05	18673000000	250	O60832;O60832-2;C9IYT0;H7C0M1;H7C2Q9;H7C2Q2;H7BZF2	O60832;O60832-2;C9IYT0	22.8569	22.8859	22.3718	28.0268	27.889	28.2819	28.9037	28.7456	28.4654	22.0333	22.991	22.8395	31.0377	30.8451
tr|A0A2R8Y8C6|A0A2R8Y8C6_HUMAN Autism susceptibility gene 2 protein OS=Homo sapiens OX=9606 GN=AUTS2 PE=1 SV=1;sp|Q8WXX7|AUTS2_HUMAN Autism susceptibility gene 2 protein OS=Homo sapiens OX=9606 GN=AUTS2 PE=1 SV=1;sp|Q8WXX7-2|AUTS2_HUMAN Isoform 2 of Autism	Autism susceptibility gene 2 protein	AUTS2		0.157105	0.849925	0.144276		+	1.03653	0.0285616	0.880217	+		0.0659733	0.917608	-0.371615		+	3.10761	0	-2.75953		27	27	27	31	31	31	138.89	0	181	3465500000	117	A0A2R8Y8C6;Q8WXX7;Q8WXX7-2;Q75MD7;A0A024RDL5;A0A2R8Y522;A0A087WVB5;A0A2R8Y568;Q8WXX7-5;H7C090;A0A590UJP3;H7C2P0;A0A2R8Y6Q9;Q8WXX7-3	A0A2R8Y8C6;Q8WXX7;Q8WXX7-2;Q75MD7;A0A024RDL5;A0A2R8Y522;A0A087WVB5;A0A2R8Y568;Q8WXX7-5	21.198	21.9395	21.8304	22.0946	22.0133	21.2929	21.9922	23.1164	22.5001	27.4052	27.4871	27.5514	25.127	25.1672
sp|Q9NS56|TOPRS_HUMAN E3 ubiquitin-protein ligase Topors OS=Homo sapiens OX=9606 GN=TOPORS PE=1 SV=1;sp|Q9NS56-2|TOPRS_HUMAN Isoform 2 of E3 ubiquitin-protein ligase Topors OS=Homo sapiens OX=9606 GN=TOPORS	E3 ubiquitin-protein ligase Topors	TOPORS	+	2.01848	0.0103676	5.33595	+	+	2.37105	0.00146352	6.69344	+		1.25922	0.0557195	5.18008		+	4.15042	0	8.59058	+	48	48	48	41.7	41.7	41.7	119.2	0	323.31	84677000000	696	Q9NS56;Q9NS56-2	Q9NS56;Q9NS56-2	25.6838	21.7778	24.2348	29.403	29.0415	29.2597	30.4067	30.6558	30.7142	24.4225	23.2494	24.0106	31.1586	30.7834
sp|Q92995|UBP13_HUMAN Ubiquitin carboxyl-terminal hydrolase 13 OS=Homo sapiens OX=9606 GN=USP13 PE=1 SV=2;sp|Q92995-2|UBP13_HUMAN Isoform 2 of Ubiquitin carboxyl-terminal hydrolase 13 OS=Homo sapiens OX=9606 GN=USP13;tr|H7C5J3|H7C5J3_HUMAN Ubiquitin carbox	Ubiquitin carboxyl-terminal hydrolase 13	USP13	+	2.86994	0.00310204	5.3273	+	+	2.97656	0.00119632	4.85892	+		0.913334	0.145678	1.89591		+	2.69944	0	3.47605	+	18	18	18	28.3	28.3	28.3	97.326	0	94.87	1843400000	80	Q92995;Q92995-2;H7C5J3;P45974-2;P45974	Q92995;Q92995-2;H7C5J3	22.4808	23.5426	21.5803	28.2874	28.1421	27.1561	27.2403	27.487	27.4532	22.8161	22.4538	21.2804	25.4148	24.3259
tr|A0A2R8YEM3|A0A2R8YEM3_HUMAN Ribosomal protein L15 (Fragment) OS=Homo sapiens OX=9606 GN=RPL15 PE=1 SV=1;tr|E7EQV9|E7EQV9_HUMAN Ribosomal protein L15 (Fragment) OS=Homo sapiens OX=9606 GN=RPL15 PE=1 SV=1;sp|P61313|RL15_HUMAN 60S ribosomal protein L15 OS=	Ribosomal protein L15;60S ribosomal protein L15	RPL15		0.281716	0.607772	0.96962			0.568646	0.109945	1.7707			0.396537	0.570131	0.430013			0.00926502	0.990099	0.00755119		7	7	7	44.4	44.4	44.4	19.968	0	49.772	2612900000	76	A0A2R8YEM3;E7EQV9;P61313;E7ENU7;E7EX53;A0A2R8Y738;P61313-2	A0A2R8YEM3;E7EQV9;P61313;E7ENU7;E7EX53;A0A2R8Y738;P61313-2	26.1422	22.6196	27.1894	26.1558	26.2153	26.489	27.0519	27.2314	26.98	25.9607	26.446	26.4051	25.9394	26.7301
tr|A0A2R8YFA9|A0A2R8YFA9_HUMAN F-actin monooxygenase OS=Homo sapiens OX=9606 GN=MICAL2 PE=1 SV=1;sp|O94851-5|MICA2_HUMAN Isoform 5 of [F-actin]-monooxygenase MICAL2 OS=Homo sapiens OX=9606 GN=MICAL2;sp|O94851-6|MICA2_HUMAN Isoform 6 of [F-actin]-monooxygen	Protein-methionine sulfoxide oxidase MICAL2	MICAL2		NaN	1	0			NaN	1	0		+	2.38202	0.0153333	-2.31234			0.347558	0.385698	-0.620718		5	5	5	3	3	3	219.06	0	12.629	311460000	7	A0A2R8YFA9;O94851-5;O94851-6;O94851-4;O94851-3;O94851;O94851-2;E9PKW5;E9PJB0;E9PRE0;E9PL42;E9PNC3;E9PKI3	A0A2R8YFA9;O94851-5;O94851-6;O94851-4;O94851-3;O94851;O94851-2	22.1539	21.4204	22.6335	20.5893	22.8269	21.0722	21.7718	21.7102	21.8654	24.467	24.2344	23.9816	22.6085	21.7756
sp|Q8NCF5|NF2IP_HUMAN NFATC2-interacting protein OS=Homo sapiens OX=9606 GN=NFATC2IP PE=1 SV=1;sp|Q8NCF5-2|NF2IP_HUMAN Isoform 2 of NFATC2-interacting protein OS=Homo sapiens OX=9606 GN=NFATC2IP	NFATC2-interacting protein	NFATC2IP	+	3.66196	0.000923077	5.26841	+	+	3.91472	0.00048855	6.10461	+	+	1.55278	0.0365153	4.09168	+	+	3.39943	0	7.14656	+	12	12	12	39.4	39.4	39.4	45.816	0	183.21	9855500000	131	Q8NCF5;Q8NCF5-2;H3BSZ7;Q8NCF5-3	Q8NCF5;Q8NCF5-2	22.5689	21.5046	22.8396	27.6351	27.6466	27.4365	28.4659	28.4842	28.2768	22.5727	20.5752	22.1268	27.0587	26.7366
tr|E9PNW4|E9PNW4_HUMAN CD59 glycoprotein OS=Homo sapiens OX=9606 PE=1 SV=1;tr|A0A2U3TZL5|A0A2U3TZL5_HUMAN CD59 glycoprotein (Fragment) OS=Homo sapiens OX=9606 GN=CD59 PE=1 SV=1;sp|P13987|CD59_HUMAN CD59 glycoprotein OS=Homo sapiens OX=9606 GN=CD59 PE=1 SV=	CD59 glycoprotein	CD59		0.623236	0.228486	-1.11461			0.202498	0.755633	-0.231921			0.436775	0.589356	-0.269002			0.434901	0.556875	-0.153687		3	3	3	29.6	29.6	29.6	11.985	0	12.819	2330600000	67	E9PNW4;A0A2U3TZL5;P13987;P13987-2;H0YET2	E9PNW4;A0A2U3TZL5;P13987;P13987-2	24.6939	25.1352	25.2612	22.349	24.5894	24.8081	24.1673	24.6684	25.5588	26.5882	26.4385	26.9059	26.3753	26.7651
sp|Q9H2G4|TSYL2_HUMAN Testis-specific Y-encoded-like protein 2 OS=Homo sapiens OX=9606 GN=TSPYL2 PE=1 SV=1	Testis-specific Y-encoded-like protein 2	TSPYL2	+	3.58006	0.000857143	5.26554	+	+	4.85932	0	9.38139	+		1.13923	0.0863124	1.9947		+	3.3306	0	5.34241	+	20	20	20	31.9	31.9	31.9	79.434	0	323.31	12318000000	198	Q9H2G4;J3KST2;J3KS33	Q9H2G4	20.816	21.7612	21.7856	27.2186	26.2044	26.7363	30.9316	30.4873	31.088	22.7492	21.09	21.6996	24.4751	24.538
sp|Q13428-3|TCOF_HUMAN Isoform 3 of Treacle protein OS=Homo sapiens OX=9606 GN=TCOF1;sp|Q13428-8|TCOF_HUMAN Isoform 8 of Treacle protein OS=Homo sapiens OX=9606 GN=TCOF1;sp|Q13428|TCOF_HUMAN Treacle protein OS=Homo sapiens OX=9606 GN=TCOF1 PE=1 SV=3;sp|Q13	Treacle protein	TCOF1	+	4.54671	0	5.21534	+	+	2.72109	0.00132731	2.46873	+		1.30563	0.0501244	6.0791		+	1.17344	0.00633313	4.97087	+	42	42	4	30.2	30.2	3.4	152.2	0	323.31	18864000000	398	Q13428-3;Q13428-8;Q13428;Q13428-4;Q13428-2;A0A6I8PRA0	Q13428-3;Q13428-8;Q13428;Q13428-4;Q13428-2;A0A6I8PRA0	25.4814	25.9629	25.6688	30.5817	30.9036	31.2738	27.8629	27.8647	28.7916	22.1313	22.0638	28.0713	31.3393	30.7441
sp|O00566|MPP10_HUMAN U3 small nucleolar ribonucleoprotein protein MPP10 OS=Homo sapiens OX=9606 GN=MPHOSPH10 PE=1 SV=2;tr|U3KQ48|U3KQ48_HUMAN U3 small nucleolar ribonucleoprotein protein MPP10 OS=Homo sapiens OX=9606 GN=MPHOSPH10 PE=1 SV=1	U3 small nucleolar ribonucleoprotein protein MPP10	MPHOSPH10	+	2.15497	0.00827632	5.17423	+	+	1.5303	0.00493553	3.3789	+	+	2.84105	0.0151818	5.66494	+	+	4.08285	0	5.60411	+	12	12	12	27.3	27.3	27.3	78.863	0	168.62	4786900000	127	O00566;U3KQ48	O00566;U3KQ48	21.7475	22.3739	25.0453	28.3306	28.31	28.0487	26.3369	26.2816	26.6849	22.6396	22.2508	21.4905	28.4637	28.4012
sp|Q9H814|PHAX_HUMAN Phosphorylated adapter RNA export protein OS=Homo sapiens OX=9606 GN=PHAX PE=1 SV=1	Phosphorylated adapter RNA export protein	PHAX	+	3.64622	0.000880734	5.16814	+	+	2.95667	0.00112392	3.9533	+		1.15591	0.0757534	2.93779		+	3.74568	0	2.51283	+	6	6	6	14.2	14.2	14.2	44.402	0	15.12	842040000	27	Q9H814	Q9H814	22.2932	21.047	21.7903	27.0953	27.0409	26.4987	25.0622	25.9181	26.0101	21.4785	21.594	21.5238	26.2286	24.9914
tr|A0A3B3IRR3|A0A3B3IRR3_HUMAN Fibrosin-1-like protein OS=Homo sapiens OX=9606 GN=FBRSL1 PE=1 SV=1		FBBRSL1	+	1.45071	0.0369936	-1.31272			0.109711	0.878301	0.12736			0.373359	0.556759	-0.709962		+	1.07196	0.0218783	-0.776223		19	19	2	29.6	29.6	1.7	110.38	0	91.841	2683700000	113	A0A3B3IRR3	A0A3B3IRR3	26.0456	27.0937	27.4062	25.3676	25.6506	25.589	27.1028	26.818	27.0067	27.1149	27.5072	26.6241	25.1557	26.206
sp|Q9ULM3|YETS2_HUMAN YEATS domain-containing protein 2 OS=Homo sapiens OX=9606 GN=YEATS2 PE=1 SV=2	YEATS domain-containing protein 2	YEATS2	+	4.92221	0	5.15153	+	+	5.34556	0	8.16214	+		0.822128	0.170028	3.07612		+	2.2989	0.000232804	6.12304	+	54	54	54	55.6	55.6	55.6	150.78	0	323.31	19546000000	437	Q9ULM3;H0Y6M6	Q9ULM3	22.3407	22.6691	22.2884	27.8889	27.4594	27.4045	30.6836	30.1965	30.9045	21.3961	23.2252	25.1807	27.8514	27.5197
tr|A0A087WWS1|A0A087WWS1_HUMAN THO complex subunit 1 OS=Homo sapiens OX=9606 GN=THOC1 PE=1 SV=1;sp|Q96FV9|THOC1_HUMAN THO complex subunit 1 OS=Homo sapiens OX=9606 GN=THOC1 PE=1 SV=1	THO complex subunit 1	THOC1	+	2.78853	0.00386916	5.12935	+	+	3.04518	0.00114872	5.97432	+		1.08606	0.09069	2.72323		+	4.71625	0	2.58861	+	34	34	34	66.1	66.1	66.1	75.651	0	323.31	17187000000	328	A0A087WWS1;Q96FV9;R4GMN4;Q96FV9-2;A0A087WY84;J3KT14;J3KRD7;R4GN58;J3QQZ3	A0A087WWS1;Q96FV9	22.2363	21.974	24.0908	28.1082	27.8899	27.6909	28.7003	28.5741	28.9497	26.5244	26.4642	26.7247	30.7959	30.1117
tr|A0A669KBH9|A0A669KBH9_HUMAN Protein Wiz OS=Homo sapiens OX=9606 GN=WIZ PE=1 SV=1;tr|A0A669KBG4|A0A669KBG4_HUMAN Protein Wiz OS=Homo sapiens OX=9606 GN=WIZ PE=1 SV=1		WIZ	+	2.2675	0.00566323	5.10009	+	+	2.5077	0.00135954	5.91372	+	+	3.15663	0.0187586	4.65872	+	+	4.73821	0	5.41846	+	34	34	1	44.7	44.7	0.8	112.53	0	124.39	9079300000	228	A0A669KBH9;A0A669KBG4	A0A669KBH9;A0A669KBG4	24.802	22.2875	21.8773	28.3195	28.2017	27.7459	28.5873	29.0517	29.069	22.6143	22.9179	23.3719	28.1241	28.0082
sp|Q9BWF3|RBM4_HUMAN RNA-binding protein 4 OS=Homo sapiens OX=9606 GN=RBM4 PE=1 SV=1;tr|E9PB51|E9PB51_HUMAN RNA-binding protein 4 (Fragment) OS=Homo sapiens OX=9606 GN=RBM4 PE=1 SV=1;sp|Q9BQ04|RBM4B_HUMAN RNA-binding protein 4B OS=Homo sapiens OX=9606 GN=R	RNA-binding protein 4;RNA-binding protein 4B	RBM4;RBM4B	+	4.79393	0	5.08191	+	+	4.54285	0	4.70781	+		0.967824	0.111645	3.42064		+	2.90387	0	5.50125	+	12	12	8	43.7	43.7	25.3	40.313	0	196.22	2999200000	88	Q9BWF3;E9PB51;Q9BQ04;Q9BWF3-4;D6R9K7;J3QRR5;Q9BWF3-3;Q9BWF3-2;E9PLB0;E9PM61;U3KQD5	Q9BWF3;E9PB51;Q9BQ04;Q9BWF3-4;D6R9K7;J3QRR5;Q9BWF3-3;Q9BWF3-2;E9PLB0;E9PM61;U3KQD5	21.6609	22.3391	22.1425	27.1483	27.0459	27.1939	26.6298	26.9311	26.7049	21.4071	20.7013	22.9672	26.6566	26.5963
tr|A0A3B3IS95|A0A3B3IS95_HUMAN L-lactate dehydrogenase OS=Homo sapiens OX=9606 PE=3 SV=1;tr|A0A5F9ZHM4|A0A5F9ZHM4_HUMAN L-lactate dehydrogenase OS=Homo sapiens OX=9606 GN=LDHB PE=1 SV=1;sp|P07195|LDHB_HUMAN L-lactate dehydrogenase B chain OS=Homo sapiens O	L-lactate dehydrogenase B chain;L-lactate dehydrogenase	LDHB		NaN	1	0			NaN	1	0			0.496321	0.620451	0.175156		+	2.27229	0.00148438	1.01284	+	4	4	4	17.8	17.8	17.8	30.688	0	44.867	440200000	21	A0A3B3IS95;A0A5F9ZHM4;P07195;C9J7H8;A8MW50;F5H793	A0A3B3IS95;A0A5F9ZHM4;P07195;C9J7H8;A8MW50;F5H793	22.0365	21.912	21.0324	22.2091	22.1494	21.8351	21.5509	22.6105	22.8818	23.6185	23.5867	24.0578	23.9699	23.8846
sp|Q00613-2|HSF1_HUMAN Isoform Short of Heat shock factor protein 1 OS=Homo sapiens OX=9606 GN=HSF1;sp|Q00613|HSF1_HUMAN Heat shock factor protein 1 OS=Homo sapiens OX=9606 GN=HSF1 PE=1 SV=1;tr|E9PMQ6|E9PMQ6_HUMAN Heat shock factor protein 1 OS=Homo sapien	Heat shock factor protein 1	HSF1	+	3.50513	0.000780488	5.0623	+	+	4.93755	0	7.9609	+		0.440911	0.460403	1.09525		+	3.12746	0	6.35516	+	14	14	13	36.8	36.8	35	52.88	0	267.2	9686500000	137	Q00613-2;Q00613;E9PMQ6;E9PI02;A0A087X1F9;A0A087WXG6	Q00613-2;Q00613;E9PMQ6;E9PI02	21.1418	21.7964	21.3609	27.0445	26.7017	25.7398	29.2545	29.0903	29.837	23.5244	21.74	21.3401	24.6777	23.3979
sp|Q9UNN5|FAF1_HUMAN FAS-associated factor 1 OS=Homo sapiens OX=9606 GN=FAF1 PE=1 SV=2;tr|B1ANM7|B1ANM7_HUMAN FAS-associated factor 1 OS=Homo sapiens OX=9606 GN=FAF1 PE=1 SV=1;sp|Q9UNN5-2|FAF1_HUMAN Isoform Short of FAS-associated factor 1 OS=Homo sapiens	FAS-associated factor 1	FAF1	+	3.05749	0.00294118	5.02	+	+	2.73804	0.00110606	4.02964	+		0.340633	0.561954	1.60967		+	2.23258	0.000399619	3.2262	+	8	8	8	16	16	16	73.953	0	49.375	1117700000	30	Q9UNN5;B1ANM7;Q9UNN5-2;B3KT28	Q9UNN5;B1ANM7;Q9UNN5-2;B3KT28	23.0372	21.4708	21.3285	27.2126	26.7584	26.9256	26.027	25.9093	25.9892	22.3965	21.0377	22.9984	25.6323	25.6081
tr|A0A3B3IT03|A0A3B3IT03_HUMAN Zinc finger protein 600 OS=Homo sapiens OX=9606 GN=ZNF600 PE=1 SV=1;sp|Q6ZNG1|ZN600_HUMAN Zinc finger protein 600 OS=Homo sapiens OX=9606 GN=ZNF600 PE=1 SV=2	Zinc finger protein 600	ZNF600		NaN	1	0			NaN	1	0		+	2.684	0.0138246	1.66575	+	+	3.2053	0.000236305	1.10743	+	14	6	6	20.6	9.7	9.7	91.092	0	20.976	620730000	27	A0A3B3IT03;Q6ZNG1;A0A3B3ITH4;A0A3B3ITY9	A0A3B3IT03;Q6ZNG1	22.5911	20.7157	21.95	22.7817	22.1116	22.4163	21.919	22.1993	22.1932	23.5506	23.9153	23.6771	25.384	25.017
tr|D6RA89|D6RA89_HUMAN Peroxisome biogenesis factor 10 OS=Homo sapiens OX=9606 GN=PEX10 PE=1 SV=1;tr|A0A3B3ITN6|A0A3B3ITN6_HUMAN Peroxisome biogenesis factor 10 (Fragment) OS=Homo sapiens OX=9606 GN=PEX10 PE=1 SV=1;tr|D6RBB0|D6RBB0_HUMAN Peroxisome biogene	Peroxisome biogenesis factor 10	PEX10		NaN	1	0			NaN	1	0		+	2.14608	0.0188508	-2.32044		+	3.54075	0	-2.81399		3	3	3	28.2	28.2	28.2	23.016	0	9.8303	174080000	8	D6RA89;A0A3B3ITN6;D6RBB0;O60683;O60683-2	D6RA89;A0A3B3ITN6;D6RBB0;O60683;O60683-2	22.6404	22.2193	22.5237	22.9467	22.0534	21.5005	23.5511	23.0296	23.2016	23.825	24.5904	24.3894	21.3745	22.7089
sp|Q9Y4E5|ZN451_HUMAN E3 SUMO-protein ligase ZNF451 OS=Homo sapiens OX=9606 GN=ZNF451 PE=1 SV=2;sp|Q9Y4E5-2|ZN451_HUMAN Isoform 2 of E3 SUMO-protein ligase ZNF451 OS=Homo sapiens OX=9606 GN=ZNF451;tr|E9PH99|E9PH99_HUMAN E3 SUMO-protein ligase ZNF451 OS=Hom	Zinc finger protein 451	ZNF451	+	3.50452	0.000768	5.0122	+	+	3.92711	0.000507937	6.23412	+	+	1.42064	0.046377	3.88398	+	+	6.04325	0	5.69746	+	79	79	79	68.7	68.7	68.7	121.48	0	323.31	573280000000	2255	Q9Y4E5;Q9Y4E5-2;E9PH99;D6RIA1;D6RAV4;H3BRF0;H3BUE2;H3BME7;A0A0B4J290;P61236;P61236-2	Q9Y4E5;Q9Y4E5-2;E9PH99	27.7471	28.6778	29.1481	33.7722	33.3314	33.506	34.6643	34.7038	34.9073	28.8539	28.9048	29.0013	34.2941	33.8446
sp|Q9UBW7|ZMYM2_HUMAN Zinc finger MYM-type protein 2 OS=Homo sapiens OX=9606 GN=ZMYM2 PE=1 SV=1	Zinc finger MYM-type protein 2	ZMYM2	+	2.44266	0.00439544	5.00672	+	+	3.13139	0.00114741	7.94526	+	+	1.51284	0.0384444	4.09373	+	+	2.93727	0	6.83305	+	54	54	53	55.3	55.3	54	154.91	0	323.31	32356000000	574	Q9UBW7;Q9UBW7-2;A0A087X151	Q9UBW7	24.8516	23.59	22.0325	28.4443	28.42	28.6299	31.3922	31.0269	31.8908	21.5981	23.8271	23.4608	28.163	28.0334
tr|A0A3B3IUA7|A0A3B3IUA7_HUMAN E3 ubiquitin/ISG15 ligase TRIM25 OS=Homo sapiens OX=9606 GN=TRIM25 PE=1 SV=1;sp|Q14258|TRI25_HUMAN E3 ubiquitin/ISG15 ligase TRIM25 OS=Homo sapiens OX=9606 GN=TRIM25 PE=1 SV=2	E3 ubiquitin/ISG15 ligase TRIM25	TRIM25		NaN	1	0		+	0.950129	0.0330372	0.985549	+		NaN	1	0			0.026216	0.971477	-0.0260461		4	4	4	11.6	11.6	11.6	51.073	0	6.9084	198640000	12	A0A3B3IUA7;Q14258	A0A3B3IUA7;Q14258	23.3127	22.4588	22.0075	21.5293	22.8556	22.1141	24.1754	23.2967	23.2636	22.2438	23.0163	22.7328	22.8336	20.4965
sp|Q7Z4V5-2|HDGR2_HUMAN Isoform 2 of Hepatoma-derived growth factor-related protein 2 OS=Homo sapiens OX=9606 GN=HDGFL2;sp|Q7Z4V5|HDGR2_HUMAN Hepatoma-derived growth factor-related protein 2 OS=Homo sapiens OX=9606 GN=HDGFL2 PE=1 SV=1;sp|Q7Z4V5-4|HDGR2_HUM	Hepatoma-derived growth factor-related protein 2	HDGFRP2	+	3.93214	0.00110345	4.99143	+	+	5.35852	0	2.97937	+		1.01921	0.101546	2.94801		+	3.46567	0	4.97704	+	6	6	6	12.2	12.2	12.2	74.229	0	102.49	1910700000	50	Q7Z4V5-2;Q7Z4V5;Q7Z4V5-4;Q7Z4V5-3;M0R0J3;K7EPS6;K7ERA4;A0A087WX58;A0A087WT54;Q9Y3E1	Q7Z4V5-2;Q7Z4V5;Q7Z4V5-4;Q7Z4V5-3;M0R0J3;K7EPS6	21.7633	21.5812	21.8168	26.1031	26.8121	27.2204	24.7487	24.7513	24.5994	21.2438	22.2425	21.959	26.1314	26.0439
sp|Q5BKZ1|ZN326_HUMAN DBIRD complex subunit ZNF326 OS=Homo sapiens OX=9606 GN=ZNF326 PE=1 SV=2;tr|A0A0A0MRN4|A0A0A0MRN4_HUMAN DBIRD complex subunit ZNF326 OS=Homo sapiens OX=9606 GN=ZNF326 PE=1 SV=1;sp|Q5BKZ1-3|ZN326_HUMAN Isoform 3 of DBIRD complex subuni	DBIRD complex subunit ZNF326	ZNF326	+	4.00134	0	4.98275	+	+	4.48421	0	5.21118	+	+	1.552	0.0361734	4.37008	+	+	4.27306	0	5.99686	+	17	17	17	39.5	39.5	39.5	65.653	0	175.82	4914100000	114	Q5BKZ1;A0A0A0MRN4;Q5BKZ1-3;Q5BKZ1-2;E2QRN4	Q5BKZ1;A0A0A0MRN4;Q5BKZ1-3	22.1477	22.9723	22.3439	27.6923	27.6521	27.0677	27.6883	27.6253	27.7839	21.1196	22.1848	21.8549	27.5237	27.1637
sp|A6NHR9|SMHD1_HUMAN Structural maintenance of chromosomes flexible hinge domain-containing protein 1 OS=Homo sapiens OX=9606 GN=SMCHD1 PE=1 SV=2;sp|A6NHR9-2|SMHD1_HUMAN Isoform 2 of Structural maintenance of chromosomes flexible hinge domain-containing p	Structural maintenance of chromosomes flexible hinge domain-containing protein 1	SMCHD1	+	2.36194	0.00520996	4.94983	+	+	3.50019	0.000922252	7.7335	+	+	3.93513	0.0244444	5.90669	+	+	3.94434	0	6.40651	+	84	84	84	52.2	52.2	52.2	226.37	0	323.31	30186000000	736	A6NHR9;A6NHR9-2;J3KTL8;A6NHR9-3;A0A2R8YCU7;A0A2R8YE92;J3KRK8;J3QSH1	A6NHR9;A6NHR9-2;J3KTL8	23.353	25.4663	23.8377	30.2858	28.7117	28.5088	31.6177	31.9619	32.2778	22.9575	21.6216	22.1215	28.257	28.1199
sp|O95453|PARN_HUMAN Poly(A)-specific ribonuclease PARN OS=Homo sapiens OX=9606 GN=PARN PE=1 SV=1;tr|A0A494BZU6|A0A494BZU6_HUMAN Poly(A)-specific ribonuclease PARN (Fragment) OS=Homo sapiens OX=9606 GN=PARN PE=1 SV=1;tr|A0A494C0K5|A0A494C0K5_HUMAN Poly(A)-	Poly(A)-specific ribonuclease PARN	PARN		NaN	1	0			NaN	1	0			NaN	1	0		+	2.21271	0.000566901	2.01599	+	3	3	3	5.3	5.3	5.3	73.45	0	22.337	384340000	4	O95453;A0A494BZU6;A0A494C0K5;A0A494C1N1;A0A494C0Q2;A0A494C1K5;A0A494C0P9;A0A494BZW7;A0A494C1G3;A0A494C156;A0A494C0W0;O95453-2;O95453-4;O95453-3;A0A494C0Q6;H3BRK1;A0A494C002	O95453;A0A494BZU6;A0A494C0K5;A0A494C1N1;A0A494C0Q2;A0A494C1K5;A0A494C0P9;A0A494BZW7;A0A494C1G3;A0A494C156;A0A494C0W0;O95453-2;O95453-4;O95453-3;A0A494C0Q6;H3BRK1	21.3645	21.811	22.2641	21.4201	22.1191	22.3803	21.7379	22.4225	23.4062	22.4593	23.5549	22.4509	22.1234	21.8959
tr|A0A494BZX7|A0A494BZX7_HUMAN Myocardin-related transcription factor A OS=Homo sapiens OX=9606 GN=MRTFA PE=1 SV=1;tr|W0Z7M9|W0Z7M9_HUMAN Mkl1 variant 1 Mkl1_S OS=Homo sapiens OX=9606 GN=MRTFA PE=1 SV=1;tr|B0QY83|B0QY83_HUMAN Myocardin-related transcriptio	MKL/myocardin-like protein 1	mkl1;MKL1		NaN	1	0			0.362475	0.344398	1.02094			NaN	1	0		+	2.67124	0	3.72069	+	9	9	8	18.4	18.4	16.9	95.659	0	59.202	1036900000	10	A0A494BZX7;W0Z7M9;B0QY83;A0A499FIJ6;E7ER32;A0A087X287;A0A087WU73;Q969V6;A0A494C1G6;B0QY84;B0QY74;A0A669KBG1;I3L2S3;Q9ULH7-2;Q9ULH7-3	A0A494BZX7;W0Z7M9;B0QY83;A0A499FIJ6;E7ER32;A0A087X287;A0A087WU73;Q969V6	21.365	20.9762	21.4218	21.977	21.854	21.3209	21.6054	24.5463	20.6741	21.4469	22.43	22.7864	21.1035	22.2407
tr|A0A494BZZ8|A0A494BZZ8_HUMAN Transmembrane protein 87B (Fragment) OS=Homo sapiens OX=9606 GN=TMEM87B PE=1 SV=1;sp|Q96K49-2|TM87B_HUMAN Isoform 2 of Transmembrane protein 87B OS=Homo sapiens OX=9606 GN=TMEM87B;sp|Q96K49|TM87B_HUMAN Transmembrane protein 8	Transmembrane protein 87B	TMEM87B		NaN	1	0			NaN	1	0			0.0989199	0.892032	-0.175502			0.385336	0.321301	-0.615283		2	2	2	4.4	4.4	4.4	62.592	0	5.0934	72135000	7	A0A494BZZ8;Q96K49-2;Q96K49;H7C1G1;A0A3B3IU29;H7C0B3	A0A494BZZ8;Q96K49-2;Q96K49;H7C1G1;A0A3B3IU29;H7C0B3	20.928	22.176	23.1363	23.499	21.6925	21.2728	21.1149	21.9223	21.2945	22.9187	22.8005	23.0832	21.706	22.6825
sp|Q16635-6|TAZ_HUMAN Isoform 6 of Tafazzin OS=Homo sapiens OX=9606 GN=TAZ;sp|Q16635|TAZ_HUMAN Tafazzin OS=Homo sapiens OX=9606 GN=TAZ PE=1 SV=1;sp|Q16635-5|TAZ_HUMAN Isoform 5 of Tafazzin OS=Homo sapiens OX=9606 GN=TAZ;sp|Q16635-2|TAZ_HUMAN Isoform 2 of T	Tafazzin	TAZ		NaN	1	0			0.0381206	0.950385	0.101601			1.5566	0.0551028	-1.10288		+	3.01428	0.000243902	-1.43058		7	7	7	28.7	28.7	28.7	29.091	0	18.506	502550000	32	Q16635-6;Q16635;Q16635-5;Q16635-2;Q16635-3;Q16635-7;Q16635-8;Q16635-9;A6XNE1;A0A499FJ53;A0A494C141;A0A494C004;F6Y2X3;Q16635-4;A0A494C0V5;A0A494C0C5;A0A494C0D2;C9J699;A0A494C1C6;A0A087WWD5;A0A494C1B0	Q16635-6;Q16635;Q16635-5;Q16635-2;Q16635-3;Q16635-7;Q16635-8;Q16635-9;A6XNE1;A0A499FJ53;A0A494C141;A0A494C004;F6Y2X3;Q16635-4;A0A494C0V5;A0A494C0C5;A0A494C0D2	22.5048	23.4817	22.4796	22.0001	21.3084	21.1053	23.6208	23.9028	21.2474	25.6002	25.3162	25.1038	24.4124	24.6334
tr|A0A494C017|A0A494C017_HUMAN Myeloid-associated differentiation marker (Fragment) OS=Homo sapiens OX=9606 GN=MYADM PE=1 SV=1;tr|C9JJV6|C9JJV6_HUMAN Myeloid-associated differentiation marker (Fragment) OS=Homo sapiens OX=9606 GN=MYADM PE=1 SV=8;tr|C9JZL8|	Myeloid-associated differentiation marker	MYADM		NaN	1	0			0.732762	0.0611987	1.40099			0.577058	0.315255	-1.75446		+	1.89361	0.00376455	-0.769725		2	2	2	27	27	27	13.153	0	102.11	1303300000	34	A0A494C017;C9JJV6;C9JZL8;A0A499FIY8;C9JC07;Q96S97	A0A494C017;C9JJV6;C9JZL8;A0A499FIY8;C9JC07;Q96S97	21.7926	21.3536	21.374	21.7903	21.7804	22.02	21.9907	22.0972	24.6352	26.2916	26.5763	26.3825	25.9985	26.0291
tr|J3KS05|J3KS05_HUMAN Chromobox protein homolog 1 (Fragment) OS=Homo sapiens OX=9606 GN=CBX1 PE=1 SV=8;sp|P83916|CBX1_HUMAN Chromobox protein homolog 1 OS=Homo sapiens OX=9606 GN=CBX1 PE=1 SV=1;tr|B5MD17|B5MD17_HUMAN Chromobox protein homolog 1 (Fragment)	Chromobox protein homolog 1	CBX1	+	2.64045	0.00405195	4.92548	+	+	3.45602	0.00108837	5.62873	+	+	1.86736	0.0203445	4.53723	+	+	4.05431	0	4.33548	+	6	6	5	36.4	36.4	36.4	20.03	0	185.71	2974500000	67	J3KS05;P83916;B5MD17;K7ELA4;C9JWS9	J3KS05;P83916;B5MD17;K7ELA4	21.3795	22.4471	23.0853	27.9212	27.5303	26.2369	27.9655	27.8819	27.9507	21.4088	21.8201	22.2581	27.7548	27.0342
sp|O14776|TCRG1_HUMAN Transcription elongation regulator 1 OS=Homo sapiens OX=9606 GN=TCERG1 PE=1 SV=2;sp|O14776-2|TCRG1_HUMAN Isoform 2 of Transcription elongation regulator 1 OS=Homo sapiens OX=9606 GN=TCERG1;tr|G3V220|G3V220_HUMAN Transcription elongati	Transcription elongation regulator 1	TCERG1	+	3.15314	0.00304878	4.89977	+	+	3.4049	0.00100645	4.6138	+	+	1.64943	0.0300979	4.44651	+	+	4.41084	0	5.36405	+	20	20	20	21.4	21.4	21.4	123.9	0	52.11	3884100000	98	O14776;O14776-2;G3V220	O14776;O14776-2;G3V220	22.7088	23.1736	21.8431	28.0611	27.4901	26.8737	26.9282	27.1626	27.4762	22.4236	21.8169	21.5938	27.6113	27.5793
sp|Q9NWK9|BCD1_HUMAN Box C/D snoRNA protein 1 OS=Homo sapiens OX=9606 GN=ZNHIT6 PE=1 SV=1;sp|Q9NWK9-2|BCD1_HUMAN Isoform 2 of Box C/D snoRNA protein 1 OS=Homo sapiens OX=9606 GN=ZNHIT6	Box C/D snoRNA protein 1	ZNHIT6	+	3.21458	0.00195	4.88415	+	+	6.30891	0	7.69605	+		1.16298	0.072102	3.42635		+	4.7213	0	8.67604	+	28	28	28	58.7	58.7	58.7	53.918	0	323.31	33398000000	219	Q9NWK9;Q9NWK9-2	Q9NWK9;Q9NWK9-2	21.5149	21.4372	21.7232	27.1837	26.6315	25.5126	29.1532	29.4511	29.1591	22.3344	21.8617	23.0657	27.1828	27.1919
tr|A0A494C0J7|A0A494C0J7_HUMAN TGc domain-containing protein OS=Homo sapiens OX=9606 PE=3 SV=1;sp|Q08188|TGM3_HUMAN Protein-glutamine gamma-glutamyltransferase E OS=Homo sapiens OX=9606 GN=TGM3 PE=1 SV=4	Protein-glutamine gamma-glutamyltransferase E;Protein-glutamine gamma-glutamyltransferase E 50 kDa catalytic chain;Protein-glutamine gamma-glutamyltransferase E 27 kDa non-catalytic chain	TGM3	+	1.41225	0.0324161	-3.0266		+	1.2603	0.00967309	-2.76741			0.0971629	0.887532	0.255175			NaN	1	0		6	6	6	10.4	10.4	10.4	78.856	0	7.1513	56078000	8	A0A494C0J7;Q08188	A0A494C0J7;Q08188	26.8207	24.3474	23.8451	22.362	22.3699	21.2015	21.6945	21.8541	23.1623	23.2329	20.976	22.7764	23.8553	22.0736
sp|P17029|ZKSC1_HUMAN Zinc finger protein with KRAB and SCAN domains 1 OS=Homo sapiens OX=9606 GN=ZKSCAN1 PE=1 SV=3;tr|E9PC66|E9PC66_HUMAN Zinc finger protein with KRAB and SCAN domains 1 OS=Homo sapiens OX=9606 GN=ZKSCAN1 PE=1 SV=1;tr|B3KRF7|B3KRF7_HUMAN	Zinc finger protein with KRAB and SCAN domains 1	ZKSCAN1	+	3.57447	0.000820513	4.86694	+	+	3.90307	0.000864469	5.86964	+	+	1.77657	0.0241563	3.26753	+	+	5.69584	0	5.80587	+	29	27	26	57.7	56.1	53.5	63.629	0	323.31	44149000000	411	P17029;E9PC66;B3KRF7;C9JRM9;A0A1W2PPT3	P17029;E9PC66;B3KRF7	25.4452	24.225	24.3772	29.5938	29.3256	29.7289	30.3511	30.5712	30.7341	25.3415	25.5561	25.6791	29.7241	29.4968
tr|E9PEM5|E9PEM5_HUMAN Lipopolysaccharide-responsive and beige-like anchor protein OS=Homo sapiens OX=9606 GN=LRBA PE=1 SV=1;tr|A0A494C1L5|A0A494C1L5_HUMAN Lipopolysaccharide-responsive and beige-like anchor protein OS=Homo sapiens OX=9606 GN=LRBA PE=1 SV=	Lipopolysaccharide-responsive and beige-like anchor protein	LRBA		NaN	1	0			0.657315	0.0972944	0.877268			1.34356	0.0745714	-1.09384		+	1.40354	0.00615955	-1.17456		7	7	7	3.5	3.5	3.5	286.97	0	16.509	207950000	13	E9PEM5;A0A494C1L5;P50851-2;P50851;A0A494C0R9;H0YAC6;A0A494BZW2;H0Y9N9;A0A3B3IU76;Q5T321;A0A0D9SF28;F5GXV7;Q8NFP9	E9PEM5;A0A494C1L5;P50851-2;P50851;A0A494C0R9;H0YAC6;A0A494BZW2	21.4775	21.9251	22.7296	20.9609	22.6314	22.7525	23.3939	21.9605	23.4096	23.3012	23.8676	24.5689	22.8486	22.628
tr|A0A499FI48|A0A499FI48_HUMAN Protein disulfide-isomerase OS=Homo sapiens OX=9606 GN=PDIA4 PE=1 SV=1;sp|P13667|PDIA4_HUMAN Protein disulfide-isomerase A4 OS=Homo sapiens OX=9606 GN=PDIA4 PE=1 SV=2	Protein disulfide-isomerase A4	PDIA4		0.264486	0.789432	0.116936			1.02656	0.0765179	-0.346179			1.08065	0.151844	-0.73208		+	1.58498	0.00240857	-2.53724		13	13	12	28.5	28.5	26.2	73.06	0	40.203	882460000	41	A0A499FI48;P13667	A0A499FI48;P13667	25.1179	24.7083	24.9363	25.2771	24.8266	25.0095	24.4865	24.7838	24.4536	26.1046	25.8282	26.2938	25.353	25.8381
sp|Q9ULJ3|ZBT21_HUMAN Zinc finger and BTB domain-containing protein 21 OS=Homo sapiens OX=9606 GN=ZBTB21 PE=1 SV=2;sp|Q9ULJ3-2|ZBT21_HUMAN Isoform 2 of Zinc finger and BTB domain-containing protein 21 OS=Homo sapiens OX=9606 GN=ZBTB21	Zinc finger and BTB domain-containing protein 21	ZBTB21	+	5.54042	0	4.83729	+	+	5.34526	0	5.43656	+		0.607981	0.287036	2.02587		+	3.67015	0	3.99809	+	15	15	15	21.8	21.8	21.8	118.87	0	161.11	1935900000	64	Q9ULJ3;Q9ULJ3-2;E7EVF9	Q9ULJ3;Q9ULJ3-2	21.6722	21.5806	21.3041	26.2864	26.2996	26.4827	26.7749	26.9195	27.1722	21.8606	21.9282	22.7713	25.7537	25.6002
sp|Q14764|MVP_HUMAN Major vault protein OS=Homo sapiens OX=9606 GN=MVP PE=1 SV=4	Major vault protein	MVP	+	5.26199	0	4.82609	+	+	5.29209	0	5.7931	+	+	1.94649	0.0197172	4.12391	+	+	1.87884	0.00108553	3.90875	+	22	22	22	34.7	34.7	34.7	99.326	0	120.01	2408600000	103	Q14764;H3BQK6;H3BRL2;H3BUK7;H3BNF6;H3BP76;H3BPZ2;H3BNF2;H3BUP3;H3BQE7	Q14764	21.9233	21.6279	22.0031	26.7767	26.7712	26.4848	27.8976	27.5958	27.4402	20.5317	22.3515	23.6799	26.1278	26.155
tr|C9JE12|C9JE12_HUMAN Transmembrane and ubiquitin-like domain-containing protein 1 (Fragment) OS=Homo sapiens OX=9606 GN=TMUB1 PE=1 SV=1;tr|C9JCW7|C9JCW7_HUMAN Transmembrane and ubiquitin-like domain-containing protein 1 (Fragment) OS=Homo sapiens OX=9606	Transmembrane and ubiquitin-like domain-containing protein 1	TMUB1		NaN	1	0			NaN	1	0			0.502046	0.568781	-0.236416		+	1.75381	0.0240301	-0.307473		2	2	2	27	27	27	16.12	0	20.628	527170000	19	C9JE12;C9JCW7;A0A590UJA9;Q9BVT8	C9JE12;C9JCW7;A0A590UJA9;Q9BVT8	21.9863	22.5977	20.908	22.3242	21.9727	22.656	22.9992	21.3121	23.309	24.9429	24.9062	25.0231	24.322	24.8563
sp|Q9UPN3|MACF1_HUMAN Microtubule-actin cross-linking factor 1, isoforms 1/2/3/5 OS=Homo sapiens OX=9606 GN=MACF1 PE=1 SV=4;sp|Q9UPN3-2|MACF1_HUMAN Isoform 2 of Microtubule-actin cross-linking factor 1, isoforms 1/2/3/5 OS=Homo sapiens OX=9606 GN=MACF1;sp|	Microtubule-actin cross-linking factor 1, isoforms 1/2/3/5	MACF1		NaN	1	0			0.194729	0.723755	0.539503			0.254013	0.791848	-0.111939		+	0.844982	0.0379209	-0.90959		11	11	11	1.9	1.9	1.9	838.3	0	24.409	860080000	30	Q9UPN3;Q9UPN3-2;Q9UPN3-3;Q9UPN3-4;H3BQK9;H3BPE1;A0A590UJG2;H0Y390;Q9UPN3-5;H0Y4F5;H0Y314;H0Y6T5;H0Y7I1;A0A5F9ZGX0;E9PLY5;E9PNZ4;A0A669KBB0	Q9UPN3;Q9UPN3-2;Q9UPN3-3;Q9UPN3-4;H3BQK9;H3BPE1;A0A590UJG2;H0Y390;Q9UPN3-5	22.554	23.171	21.8913	22.8415	22.4062	21.2865	21.9997	22.1644	25.0707	25.5657	25.2862	25.4734	25.0761	25.6093
sp|Q13129|RLF_HUMAN Zinc finger protein Rlf OS=Homo sapiens OX=9606 GN=RLF PE=1 SV=2	Zinc finger protein Rlf	RLF	+	3.26911	0.00202597	4.82422	+	+	5.11845	0	5.66679	+		1.36733	0.0501346	3.05966		+	3.08805	0	3.02488	+	34	34	34	25.4	25.4	25.4	217.95	0	165.29	4699500000	188	Q13129	Q13129	22.9769	22.6287	22.742	28.5385	27.1527	27.1292	28.7068	28.1543	28.487	24.1627	24.0902	23.3419	28.1894	27.6599
sp|Q13029-2|PRDM2_HUMAN Isoform 2 of PR domain zinc finger protein 2 OS=Homo sapiens OX=9606 GN=PRDM2;sp|Q13029|PRDM2_HUMAN PR domain zinc finger protein 2 OS=Homo sapiens OX=9606 GN=PRDM2 PE=1 SV=3;sp|Q13029-5|PRDM2_HUMAN Isoform 5 of PR domain zinc finge	PR domain zinc finger protein 2	PRDM2	+	4.31563	0	4.82229	+	+	3.58818	0.00111164	4.25815	+	+	2.99304	0.0155429	5.03411	+	+	4.44646	0	4.78541	+	28	28	28	23.4	23.4	23.4	184.96	0	269.44	3972400000	152	Q13029-2;Q13029;Q13029-5;Q13029-3;D6RAA0;Q13029-4	Q13029-2;Q13029;Q13029-5;Q13029-3	22.3895	23.2652	22.7754	27.5496	27.7204	27.6269	26.9527	26.7233	27.5286	22.0586	22.7325	22.5083	28.1213	27.9119
sp|Q07666|KHDR1_HUMAN KH domain-containing, RNA-binding, signal transduction-associated protein 1 OS=Homo sapiens OX=9606 GN=KHDRBS1 PE=1 SV=1;sp|Q07666-3|KHDR1_HUMAN Isoform 3 of KH domain-containing, RNA-binding, signal transduction-associated protein 1	KH domain-containing, RNA-binding, signal transduction-associated protein 1	KHDRBS1	+	1.81134	0.0153926	4.78903	+	+	1.50534	0.0049153	3.90405	+	+	2.04808	0.014293	5.92827	+	+	2.15447	0.000405014	5.22828	+	13	13	13	34.8	34.8	34.8	48.227	0	74.255	5391900000	84	Q07666;Q07666-3;Q07666-2;Q5VWX1;O75525-2;O75525	Q07666;Q07666-3;Q07666-2	25.1823	25.0474	21.574	28.7659	28.6395	28.7653	27.5008	27.7903	28.2248	21.3313	24.5443	21.6607	28.8454	29.4293
tr|A0A5F9ZH11|A0A5F9ZH11_HUMAN Peregrin (Fragment) OS=Homo sapiens OX=9606 GN=BRPF1 PE=1 SV=1;sp|P55201-4|BRPF1_HUMAN Isoform 4 of Peregrin OS=Homo sapiens OX=9606 GN=BRPF1;sp|P55201-3|BRPF1_HUMAN Isoform 3 of Peregrin OS=Homo sapiens OX=9606 GN=BRPF1;sp|P	Peregrin	BRPF1		0.547792	0.497588	-0.201807			0.298751	0.676492	-0.170874			1.05723	0.140824	0.873458			0.319143	0.408824	-0.97594		10	10	10	12.7	12.7	12.7	140.65	0	16.259	663880000	34	A0A5F9ZH11;P55201-4;P55201-3;P55201;P55201-2;A0A5F9ZHW9;A0A5F9ZHX4;C9JDK5;C9JHC0	A0A5F9ZH11;P55201-4;P55201-3;P55201;P55201-2;A0A5F9ZHW9;A0A5F9ZHX4	24.9459	25.1559	25.4731	24.8791	25.0525	25.0379	25.3672	24.8112	24.8839	23.9569	24.0638	24.0595	24.5862	24.4451
sp|Q15742|NAB2_HUMAN NGFI-A-binding protein 2 OS=Homo sapiens OX=9606 GN=NAB2 PE=1 SV=1;sp|Q15742-3|NAB2_HUMAN Isoform 3 of NGFI-A-binding protein 2 OS=Homo sapiens OX=9606 GN=NAB2	NGFI-A-binding protein 2	NAB2	+	2.20526	0.00808054	4.74048	+	+	2.73234	0.00117742	6.25791	+	+	1.82191	0.0265606	2.28404	+	+	3.24547	0	5.61573	+	15	14	14	41.5	39.8	39.8	56.593	0	109.21	4833000000	99	Q15742;Q15742-3;Q15742-2	Q15742;Q15742-3	22.1999	20.9263	23.8763	27.6392	26.7296	26.8551	28.6054	28.5338	28.637	22.9289	21.0678	21.6205	24.3408	24.0758
sp|Q09666|AHNK_HUMAN Neuroblast differentiation-associated protein AHNAK OS=Homo sapiens OX=9606 GN=AHNAK PE=1 SV=2	Neuroblast differentiation-associated protein AHNAK	AHNAK	+	6.58568	0	4.73712	+	+	5.377	0	2.79419	+		1.04946	0.0958408	2.71356		+	3.99096	0	2.29386	+	243	243	243	68	68	68	629.09	0	323.31	106460000000	1844	Q09666;E9PQE3;E9PJZ0;E9PKR9;E9PJC6;E9PLK4;Q09666-2	Q09666	27.3363	27.3587	27.5441	32.1428	32.1847	32.1229	30.2238	30.1188	30.2791	29.5354	29.6847	29.9296	33.4433	33.8255
sp|Q96IT1-2|ZN496_HUMAN Isoform 2 of Zinc finger protein 496 OS=Homo sapiens OX=9606 GN=ZNF496;sp|Q96IT1|ZN496_HUMAN Zinc finger protein 496 OS=Homo sapiens OX=9606 GN=ZNF496 PE=1 SV=1;tr|A0A0C4DGR5|A0A0C4DGR5_HUMAN Zinc finger protein 496 (Fragment) OS=Ho	Zinc finger protein 496	ZNF496	+	3.75589	0.000969697	4.73245	+	+	4.14152	0.000663212	6.38181	+		0.766749	0.204066	2.44065		+	3.53392	0	5.29782	+	18	18	18	39.8	39.8	39.8	70.972	0	285.99	5964700000	113	Q96IT1-2;Q96IT1;A0A0C4DGR5	Q96IT1-2;Q96IT1;A0A0C4DGR5	21.7437	21.3921	22.4609	26.8838	26.3457	26.5647	27.9207	28.1829	28.6387	23.6678	22.3238	22.3344	26.6276	26.5956
tr|A0A0U1RRH6|A0A0U1RRH6_HUMAN PHD finger protein 14 OS=Homo sapiens OX=9606 GN=PHF14 PE=1 SV=1;sp|O94880-2|PHF14_HUMAN Isoform 2 of PHD finger protein 14 OS=Homo sapiens OX=9606 GN=PHF14	PHD finger protein 14	PHF14	+	3.35301	0.00138776	4.70183	+	+	4.1817	0.000581818	4.84913	+		1.15893	0.0771751	2.51688		+	2.3738	0.000337102	3.4533	+	22	22	1	29	29	1.2	106.99	0	259.4	3961500000	119	A0A0U1RRH6;O94880-2	A0A0U1RRH6;O94880-2	21.6235	21.8281	22.1076	26.8723	27.0689	25.7236	26.466	26.4525	27.1882	24.9848	23.0184	23.5933	27.1576	27.2815
sp|P18848|ATF4_HUMAN Cyclic AMP-dependent transcription factor ATF-4 OS=Homo sapiens OX=9606 GN=ATF4 PE=1 SV=3	Cyclic AMP-dependent transcription factor ATF-4	ATF4	+	3.39215	0.00143662	4.69942	+	+	3.89379	0.000484848	6.40267	+		1.03585	0.0957471	3.28366		+	5.0477	0	7.58385	+	10	10	10	25.1	25.1	25.1	38.589	0	306.8	12832000000	93	P18848	P18848	21.4995	22.5543	22.9431	27.0238	26.9917	27.0797	28.6298	28.6875	28.8877	21.6906	22.0194	21.5444	26.5106	26.524
sp|P09874|PARP1_HUMAN Poly [ADP-ribose] polymerase 1 OS=Homo sapiens OX=9606 GN=PARP1 PE=1 SV=4	Poly [ADP-ribose] polymerase 1	PARP1	+	1.98643	0.0103664	4.66644	+	+	1.93284	0.00242226	4.41387	+		1.01029	0.103729	3.03053		+	2.27577	0.000332657	4.83998	+	33	33	33	41.3	41.3	41.3	113.08	0	192.4	7247900000	191	P09874;Q5VX84;Q5VX85	P09874	21.8007	25.2056	23.5974	28.3054	28.6269	27.6708	28.3006	27.9203	27.6245	24.7356	21.934	23.9113	27.8166	27.5657
sp|Q14839-2|CHD4_HUMAN Isoform 2 of Chromodomain-helicase-DNA-binding protein 4 OS=Homo sapiens OX=9606 GN=CHD4;tr|A0A2R8Y425|A0A2R8Y425_HUMAN DNA helicase (Fragment) OS=Homo sapiens OX=9606 GN=CHD4 PE=1 SV=1;sp|Q14839|CHD4_HUMAN Chromodomain-helicase-DNA-	Chromodomain-helicase-DNA-binding protein 4	CHD4	+	3.974	0.00111628	4.6532	+	+	4.50119	0	7.17934	+	+	2.04127	0.0175723	3.71684	+	+	3.63257	0	5.46983	+	58	58	44	42.1	42.1	32.9	220.85	0	323.31	8484400000	240	Q14839-2;A0A2R8Y425;Q14839;A0A0C4DGG9;A0A2R8Y521;A0A2R8Y212;F5GWX5;A0A2U3TZM0;A0A2R8YFK9;A0A2R8Y5J0;A0A2R8YFD8;A0A2R8YDJ9;A0A2R8YD40;A0A2R8Y4X2;A0A2R8YDW2;A0A2R8YER1;A0A2R8Y8C1;A0A2R8Y445;A0A2R8Y5Z7;A0A2R8Y7I0;A0A2R8Y685;A0A2R8Y7M9;A0A2R8Y8B3;A0A2R8Y5M9;A0A2R8YE38;F5H6N4;A0A2R8Y7X1;A0A2R8Y6G9;A0A2R8Y795	Q14839-2;A0A2R8Y425;Q14839;A0A0C4DGG9;A0A2R8Y521;A0A2R8Y212;F5GWX5;A0A2U3TZM0;A0A2R8YFK9;A0A2R8Y5J0;A0A2R8YFD8;A0A2R8YDJ9;A0A2R8YD40;A0A2R8Y4X2;A0A2R8YDW2;A0A2R8YER1;A0A2R8Y8C1;A0A2R8Y445;A0A2R8Y5Z7;A0A2R8Y7I0	22.74	22.5175	22.1659	27.3398	27.4211	26.6221	29.7066	29.1065	30.1483	22.9842	22.4156	21.5488	26.6891	26.7079
tr|B9A041|B9A041_HUMAN Malate dehydrogenase, cytoplasmic OS=Homo sapiens OX=9606 GN=MDH1 PE=1 SV=1;tr|A0A5K1VW95|A0A5K1VW95_HUMAN Malate dehydrogenase OS=Homo sapiens OX=9606 GN=MDH1 PE=1 SV=1;sp|P40925-2|MDHC_HUMAN Isoform 2 of Malate dehydrogenase, cytop	Malate dehydrogenase, cytoplasmic	MDH1		NaN	1	0			0.548525	0.148314	0.855055			NaN	1	0			0.455277	0.181287	1.24623		3	3	3	18.6	18.6	18.6	23.038	0	9.1576	253520000	11	B9A041;A0A5K1VW95;P40925-2;P40925;P40925-3;B8ZZ51;C9JRL4;C9JF79	B9A041;A0A5K1VW95;P40925-2;P40925;P40925-3;B8ZZ51	22.2513	23.7673	21.4194	23.5482	22.0693	22.3674	23.2326	23.4296	23.341	20.8471	22.7511	23.0035	21.8768	22.5082
sp|O95239-2|KIF4A_HUMAN Isoform 2 of Chromosome-associated kinesin KIF4A OS=Homo sapiens OX=9606 GN=KIF4A;sp|O95239|KIF4A_HUMAN Chromosome-associated kinesin KIF4A OS=Homo sapiens OX=9606 GN=KIF4A PE=1 SV=3;sp|Q2VIQ3|KIF4B_HUMAN Chromosome-associated kines	Chromosome-associated kinesin KIF4A;Chromosome-associated kinesin KIF4B	KIF4A;KIF4B	+	3.02991	0.00280899	4.62085	+	+	3.12186	0.0011448	4.54404	+		0.812356	0.181438	2.38338		+	2.47307	0.000248307	4.859	+	20	20	20	20.1	20.1	20.1	128.46	0	107.37	2476100000	70	O95239-2;O95239;Q2VIQ3;Q5JRK0;H0Y718;J3KPF9;A0A087X011;E9PES4;Q9Y496;Q6ZMV9-3;Q6ZMV9	O95239-2;O95239;Q2VIQ3	22.3137	22.2355	20.8231	26.1289	26.817	26.2889	26.4642	26.1957	26.3445	22.8741	20.5365	22.8348	25.4735	25.6863
tr|A0A669KAX4|A0A669KAX4_HUMAN Cullin-4B OS=Homo sapiens OX=9606 GN=CUL4B PE=1 SV=1;tr|K4DI93|K4DI93_HUMAN Cullin 4B, isoform CRA_e OS=Homo sapiens OX=9606 GN=CUL4B PE=1 SV=1;sp|Q13620-1|CUL4B_HUMAN Isoform 2 of Cullin-4B OS=Homo sapiens OX=9606 GN=CUL4B;s	Cullin-4B	CUL4B		0.695388	0.172021	-1.89987			0.660488	0.075139	1.80985			0.90059	0.288609	-0.368566			0.345265	0.786492	-0.0740242		21	21	21	28.4	28.4	28.4	102.53	0	112.2	2131200000	118	A0A669KAX4;K4DI93;Q13620-1;Q13620;Q13620-3;A0A0A0MR50;Q13619-2;Q13619;A0A669KAU9;A0A087WWN2	A0A669KAX4;K4DI93;Q13620-1;Q13620;Q13620-3	25.1747	25.3728	21.5554	22.1633	21.9483	22.2917	25.7915	25.8462	25.8947	26.6415	26.5101	26.5769	25.9032	26.1713
sp|Q8IY92|SLX4_HUMAN Structure-specific endonuclease subunit SLX4 OS=Homo sapiens OX=9606 GN=SLX4 PE=1 SV=3;sp|Q8IY92-2|SLX4_HUMAN Isoform 2 of Structure-specific endonuclease subunit SLX4 OS=Homo sapiens OX=9606 GN=SLX4	Structure-specific endonuclease subunit SLX4	SLX4	+	2.62567	0.00391632	4.61676	+	+	3.44221	0.00110638	6.14864	+	+	1.88437	0.0193333	8.03697	+	+	4.15173	0	9.93995	+	61	61	61	44.9	44.9	44.9	200.01	0	323.31	64816000000	765	Q8IY92;Q8IY92-2	Q8IY92;Q8IY92-2	25.2265	23.778	24.0103	29.9578	28.4352	28.472	30.0088	31.0818	30.37	22.7121	22.0397	20.8304	31.7157	31.6884
tr|A0A669KB10|A0A669KB10_HUMAN Golgi-specific brefeldin A-resistance guanine nucleotide exchange factor 1 OS=Homo sapiens OX=9606 GN=GBF1 PE=1 SV=1;tr|A0A669KBG8|A0A669KBG8_HUMAN Golgi-specific brefeldin A-resistance guanine nucleotide exchange factor 1 OS	Golgi-specific brefeldin A-resistance guanine nucleotide exchange factor 1	GBF1		NaN	1	0			NaN	1	0			NaN	1	0			0.398328	0.363415	-0.386342		3	3	3	2	2	2	209.21	0	8.8886	87381000	4	A0A669KB10;A0A669KBG8;Q92538-3;Q92538-2;Q92538	A0A669KB10;A0A669KBG8;Q92538-3;Q92538-2;Q92538	21.9532	21.3005	21.624	22.8557	22.7287	22.2739	21.3556	21.8684	22.0675	21.8011	22.8441	23.1511	22.7166	23.3347
sp|Q8NAF0|ZN579_HUMAN Zinc finger protein 579 OS=Homo sapiens OX=9606 GN=ZNF579 PE=1 SV=2	Zinc finger protein 579	ZNF579	+	2.28351	0.00564384	4.60934	+	+	2.17996	0.00148327	4.816	+		1.15837	0.0793692	2.23538		+	3.04388	0	2.17485	+	15	15	15	38.3	38.3	38.3	60.509	0	179.39	2751100000	91	Q8NAF0	Q8NAF0	24.0716	21.3125	22.9991	27.7381	26.9882	27.485	27.2902	27.0076	28.5334	23.8761	23.4107	23.7897	26.7859	26.8609
tr|A0A2R8YH03|A0A2R8YH03_HUMAN Protein TASOR 2 OS=Homo sapiens OX=9606 GN=TASOR2 PE=1 SV=1;sp|Q5VWN6|TASO2_HUMAN Protein TASOR 2 OS=Homo sapiens OX=9606 GN=TASOR2 PE=1 SV=1;sp|Q5VWN6-2|TASO2_HUMAN Isoform 2 of Protein TASOR 2 OS=Homo sapiens OX=9606 GN=TAS	Protein FAM208B	FAM208B		0.0222572	0.973486	-0.0474453		+	3.74905	0.000742138	6.22536	+		0.522922	0.493291	0.35487			0.0899325	0.895497	-0.13948		43	43	43	24.6	24.6	24.6	293.55	0	263.29	2126400000	95	A0A2R8YH03;Q5VWN6;Q5VWN6-2;J3KPH3	A0A2R8YH03;Q5VWN6;Q5VWN6-2	21.4448	23.0071	22.5186	22.7231	22.9072	21.1978	28.6286	28.4661	28.5518	22.2879	21.5843	21.7137	22.5138	22.3143
sp|Q8IX07|FOG1_HUMAN Zinc finger protein ZFPM1 OS=Homo sapiens OX=9606 GN=ZFPM1 PE=1 SV=2	Zinc finger protein ZFPM1	ZFPM1		NaN	1	0		+	2.88393	0.00116942	6.22322	+		0.609624	0.284428	2.11923			NaN	1	0		3	3	3	4.2	4.2	4.2	104.89	0	11.172	7648300000	4	Q8IX07	Q8IX07	20.6208	21.231	23.189	23.1559	22.7519	20.8388	27.9596	27.8789	27.872	21.6364	22.0134	22.1783	22.5989	22.4246
sp|O75937|DNJC8_HUMAN DnaJ homolog subfamily C member 8 OS=Homo sapiens OX=9606 GN=DNAJC8 PE=1 SV=2	DnaJ homolog subfamily C member 8	DNAJC8	+	3.43751	0.000695652	4.59544	+	+	3.72697	0.000882051	3.92111	+		0.63799	0.269846	2.08403		+	2.84678	0	3.75693	+	6	6	6	30	30	30	29.841	0	25.979	1123300000	28	O75937;S4R3J5	O75937	21.0374	21.9478	21.3432	26.5021	26.1688	25.4438	25.4551	25.5229	25.1137	20.9265	21.8838	22.565	25.0846	25.4484
sp|Q9UBT2|SAE2_HUMAN SUMO-activating enzyme subunit 2 OS=Homo sapiens OX=9606 GN=UBA2 PE=1 SV=2;sp|Q9UBT2-2|SAE2_HUMAN Isoform 2 of SUMO-activating enzyme subunit 2 OS=Homo sapiens OX=9606 GN=UBA2	SUMO-activating enzyme subunit 2	UBA2	+	1.49218	0.0261058	4.58349	+	+	1.6805	0.00389004	5.2253	+	+	2.16178	0.0151429	4.27231	+	+	2.65359	0	5.57162	+	30	30	30	67.2	67.2	67.2	71.223	0	323.31	15083000000	256	Q9UBT2;Q9UBT2-2;K7EPL2;K7ESK7;U3KQ93;U3KQ55;K7ES38	Q9UBT2;Q9UBT2-2	22.1987	21.3469	25.9408	27.6645	27.4841	28.0882	28.5164	28.2549	28.3909	25.4412	24.1781	22.9304	29.0597	28.643
sp|Q8IYH5-2|ZZZ3_HUMAN Isoform 2 of ZZ-type zinc finger-containing protein 3 OS=Homo sapiens OX=9606 GN=ZZZ3;sp|Q8IYH5|ZZZ3_HUMAN ZZ-type zinc finger-containing protein 3 OS=Homo sapiens OX=9606 GN=ZZZ3 PE=1 SV=1;sp|Q8IYH5-4|ZZZ3_HUMAN Isoform 4 of ZZ-type	ZZ-type zinc finger-containing protein 3	ZZZ3	+	2.88549	0.00302488	4.539	+	+	2.95851	0.00117825	4.78266	+	+	2.38516	0.0134444	3.58001	+	+	3.19124	0	3.75188	+	12	12	12	21.3	21.3	21.3	101.92	0	112.8	1953200000	73	Q8IYH5-2;Q8IYH5;Q8IYH5-4;Q8IYH5-3;C9JUA4;C9J283	Q8IYH5-2;Q8IYH5;Q8IYH5-4	22.6058	21.4023	23.3336	27.032	27.0291	26.8976	27.3493	27.0652	27.2752	21.6583	22.3164	21.8603	26.0776	26.1208
sp|Q9H7L9|SDS3_HUMAN Sin3 histone deacetylase corepressor complex component SDS3 OS=Homo sapiens OX=9606 GN=SUDS3 PE=1 SV=2	Sin3 histone deacetylase corepressor complex component SDS3	SUDS3	+	3.54365	0.000761905	4.52943	+	+	2.88223	0.00118537	2.41627	+	+	3.03276	0.0148444	3.05885	+	+	1.32669	0.0049553	2.31953	+	6	6	6	24.7	24.7	24.7	38.136	0	11.169	409860000	22	Q9H7L9	Q9H7L9	22.4927	21.56	21.674	26.7445	26.6105	25.96	24.2732	24.2442	24.4581	21.4842	20.798	21.506	24.5118	24.6446
tr|A0A6I8PTU7|A0A6I8PTU7_HUMAN AT-rich interactive domain-containing protein 1B (Fragment) OS=Homo sapiens OX=9606 GN=ARID1B PE=1 SV=1		ARID1B		NaN	1	0			NaN	1	0		+	1.45784	0.041874	-4.70364			0.493888	0.128958	-2.17213		18	1	1	55.4	6	6	66.856	0	35.274	2814400000	22	A0A6I8PTU7	A0A6I8PTU7	21.6558	22.3347	22.4177	22.348	21.4323	21.7772	21.1024	20.9393	22.1002	29.48	26.4708	26.1393	21.8117	24.7585
sp|P17676|CEBPB_HUMAN CCAAT/enhancer-binding protein beta OS=Homo sapiens OX=9606 GN=CEBPB PE=1 SV=2;sp|P17676-2|CEBPB_HUMAN Isoform 2 of CCAAT/enhancer-binding protein beta OS=Homo sapiens OX=9606 GN=CEBPB	CCAAT/enhancer-binding protein beta	CEBPB	+	3.5438	0.000755906	4.51065	+	+	3.15804	0.00125604	3.55038	+		0.292906	0.63347	0.805807		+	2.47098	0.000244989	4.25535	+	7	7	7	31.9	31.9	31.9	36.105	0	91.202	2055800000	42	P17676;P17676-2;P17676-3	P17676;P17676-2	22.6121	21.8206	23.0703	26.8152	27.0594	27.1604	25.8789	26.1428	26.1325	21.7362	23.7658	21.7122	22.5478	24.9571
tr|H0YG77|H0YG77_HUMAN Transmembrane protein 120B (Fragment) OS=Homo sapiens OX=9606 GN=TMEM120B PE=1 SV=1;sp|A0PK00|T120B_HUMAN Transmembrane protein 120B OS=Homo sapiens OX=9606 GN=TMEM120B PE=1 SV=1	Transmembrane protein 120B	TMEM120B		NaN	1	0			NaN	1	0		+	2.22836	0.0177778	-1.99785		+	1.26124	0.0131592	-0.701593		3	3	3	20.6	20.6	20.6	29.036	0	6.0996	59426000	3	H0YG77;A0PK00	H0YG77;A0PK00	21.3518	21.6864	21.1593	22.3437	22.6917	23.5513	21.827	22.2102	23.0127	23.4784	23.6443	23.6041	21.2477	21.1682
sp|P55265-5|DSRAD_HUMAN Isoform 5 of Double-stranded RNA-specific adenosine deaminase OS=Homo sapiens OX=9606 GN=ADAR;sp|P55265|DSRAD_HUMAN Double-stranded RNA-specific adenosine deaminase OS=Homo sapiens OX=9606 GN=ADAR PE=1 SV=4;sp|P55265-4|DSRAD_HUMAN I	Double-stranded RNA-specific adenosine deaminase	ADAR	+	5.316	0	4.47328	+	+	5.57513	0	6.10043	+		0.582096	0.297138	2.55672		+	4.29458	0	5.14463	+	19	19	19	30.3	30.3	30.3	103.64	0	148.82	4073300000	90	P55265-5;P55265;P55265-4;A0A3B3IRQ9;P55265-3;P55265-2;A0A3B3ISX1;A0A3B3ITG9;A0A3B3ISU1	P55265-5;P55265;P55265-4;A0A3B3IRQ9;P55265-3;P55265-2;A0A3B3ISX1	21.1821	21.2596	21.3586	25.9688	25.5423	25.709	27.3452	27.1207	27.6357	22.6998	21.795	22.2847	26.9369	26.5724
sp|O00232|PSD12_HUMAN 26S proteasome non-ATPase regulatory subunit 12 OS=Homo sapiens OX=9606 GN=PSMD12 PE=1 SV=3;sp|O00232-2|PSD12_HUMAN Isoform 2 of 26S proteasome non-ATPase regulatory subunit 12 OS=Homo sapiens OX=9606 GN=PSMD12	26S proteasome non-ATPase regulatory subunit 12	PSMD12	+	3.03616	0.0027933	4.43471	+	+	3.62562	0.000980057	6.17212	+	+	2.18738	0.0146154	4.9989	+	+	4.25198	0	6.83438	+	16	16	16	43.4	43.4	43.4	52.904	0	323.31	7967500000	138	O00232;O00232-2;J3KTJ5;J3KSK1	O00232;O00232-2	22.1496	23.7673	22.4743	27.2289	27.0611	27.4054	28.9342	28.9805	28.9929	21.6885	20.7818	21.9684	27.3476	27.3917
sp|P04156|PRIO_HUMAN Major prion protein OS=Homo sapiens OX=9606 GN=PRNP PE=1 SV=1;tr|A2A2V1|A2A2V1_HUMAN Major prion protein (Fragment) OS=Homo sapiens OX=9606 GN=PRNP PE=1 SV=1;tr|X6RKS3|X6RKS3_HUMAN Major prion protein (Fragment) OS=Homo sapiens OX=9606	Major prion protein	PRNP		0.247771	0.702726	0.413963			0.558949	0.148561	0.7663			0.965101	0.160554	-1.00866		+	1.54682	0.00391622	-1.51225		2	2	2	8.7	8.7	8.7	27.661	0	10.615	167290000	15	P04156;A2A2V1;X6RKS3	P04156;A2A2V1;X6RKS3	21.9019	22.2285	22.2392	22.3068	21.541	23.7638	23.6729	23.2802	21.7154	23.9054	23.4858	24.0439	23.1983	23.3245
sp|P37275-2|ZEB1_HUMAN Isoform 2 of Zinc finger E-box-binding homeobox 1 OS=Homo sapiens OX=9606 GN=ZEB1;sp|P37275-5|ZEB1_HUMAN Isoform 5 of Zinc finger E-box-binding homeobox 1 OS=Homo sapiens OX=9606 GN=ZEB1;sp|P37275|ZEB1_HUMAN Zinc finger E-box-binding	Zinc finger E-box-binding homeobox 1	ZEB1	+	2.5644	0.004128	4.3722	+	+	3.53605	0.000945055	7.32867	+		0.687147	0.240971	2.63793		+	4.70157	0	5.99787	+	28	28	28	39.6	39.6	39.6	124.07	0	323.31	9325100000	154	P37275-2;P37275-5;P37275;P37275-4;P37275-3;H0YMD3;H0YND9;H0YMN2;A0A1B0GVV8;A0JP08;A0A1B0GW50;A0A1B0GWI0;O60315;A0A1B0GV02;O60315-2;A0A1X7SC99;E7ESP8;U3KQ51;E7EUW9;F6TDF5	P37275-2;P37275-5;P37275;P37275-4;P37275-3	21.2328	22.33	23.2898	27.1462	26.6874	26.1357	29.677	29.2871	29.8746	22.7178	21.857	22.328	26.8048	26.5272
sp|A2RRD8|ZN320_HUMAN Zinc finger protein 320 OS=Homo sapiens OX=9606 GN=ZNF320 PE=1 SV=1;tr|M0R2L4|M0R2L4_HUMAN Zinc finger protein 320 (Fragment) OS=Homo sapiens OX=9606 GN=ZNF320 PE=1 SV=1;tr|M0QX96|M0QX96_HUMAN Zinc finger protein 320 (Fragment) OS=Hom	Zinc finger protein 320	ZNF320		NaN	1	0			NaN	1	0			0.406772	0.631265	0.224389			0.0626452	0.948452	0.0279109		15	8	8	34.4	24.4	24.4	59.326	0	18.632	526100000	17	A2RRD8;M0R2L4;M0QX96;M0QZA2;M0R1K6;A0A669KBJ2;M0R099;M0R3A5;F8WAL3;L0R8M2;M0R287;M0R0P3;M0R183;A0A0A0MS71;M0R1T0;M0QXZ2;M0R0Z8;Q3MIS6;M0QZG9;C9K0H2;M0R2P3;M0QXZ4;M0QZ38;M0QX59;M0R0R1;M0R2R1;M0R367;M0R2I1;M0R0D9;M0QYU5;M0QZA6;A0A0B4J2B2;M0R0C2;M0R1N1;M0QYS4;Q6PDB4;F5H026;M0QXF0;Q6PDB4-2;M0R1N4;M0R0M5	A2RRD8;M0R2L4;M0QX96;M0QZA2	21.7685	22.9682	22.1372	22.6134	21.6079	21.4085	21.6848	21.3235	21.4985	24.3924	24.7028	24.8825	24.8941	24.5578
sp|A5PLL7-2|PDES1_HUMAN Isoform 2 of Plasmanylethanolamine desaturase OS=Homo sapiens OX=9606 GN=PEDS1;sp|A5PLL7|PDES1_HUMAN Plasmanylethanolamine desaturase OS=Homo sapiens OX=9606 GN=PEDS1 PE=1 SV=3;tr|Q5TGE2|Q5TGE2_HUMAN HCG2044780, isoform CRA_b OS=Hom	Transmembrane protein 189	TMEM189;TMEM189-UBE2V1		NaN	1	0			NaN	1	0			0.13135	0.886391	-0.0796916		+	1.47926	0.00426511	-1.39224		3	3	3	13.9	13.9	13.9	30.85	0.00091519	3.4628	105500000	8	A5PLL7-2;A5PLL7;Q5TGE2;I3L0A0;F8W924;Q13404-1	A5PLL7-2;A5PLL7;Q5TGE2;I3L0A0	20.6858	22.1547	23.0311	22.0052	23.0976	22.5517	22.4706	21.7932	21.5755	23.148	22.9657	23.2856	22.9038	22.8014
sp|O75928-2|PIAS2_HUMAN Isoform PIAS2-alpha of E3 SUMO-protein ligase PIAS2 OS=Homo sapiens OX=9606 GN=PIAS2	E3 SUMO-protein ligase PIAS2	PIAS2	+	3.67259	0.000864865	4.33764	+	+	4.82231	0	9.46275	+	+	1.83954	0.0195516	4.03382	+	+	4.2727	0	8.73382	+	35	35	2	67.5	67.5	8.6	63.395	0	323.31	49005000000	336	O75928-2;B4DGW0	O75928-2	22.9943	23.0828	22.1552	27.3747	26.8076	27.063	31.9709	31.9728	32.6769	21.6328	22.4352	21.1519	26.601	26.7478
sp|P43268|ETV4_HUMAN ETS translocation variant 4 OS=Homo sapiens OX=9606 GN=ETV4 PE=1 SV=3;tr|B7Z5F4|B7Z5F4_HUMAN ETS translocation variant 4 OS=Homo sapiens OX=9606 GN=ETV4 PE=1 SV=1;sp|P43268-2|ETV4_HUMAN Isoform 2 of ETS translocation variant 4 OS=Homo	ETS translocation variant 4	ETV4	+	2.90075	0.00304	4.32409	+	+	3.10255	0.00118519	5.3051	+		NaN	1	0		+	1.95295	0.00107843	2.55487	+	7	5	5	21.3	17.6	17.6	53.938	0	118.33	1335100000	23	P43268;B7Z5F4;P43268-2;P43268-3	P43268;B7Z5F4;P43268-2;P43268-3	22.6091	21.8939	20.8006	26.2202	25.9235	26.1323	26.64	27.4815	27.0975	22.4983	21.7694	23.5685	21.8412	22.9104
sp|A6NFI3|ZN316_HUMAN Zinc finger protein 316 OS=Homo sapiens OX=9606 GN=ZNF316 PE=1 SV=1	Zinc finger protein 316	ZNF316		1.54671	0.0550358	-0.616708		+	2.20645	0.00273802	-1.36142			0.953227	0.242322	-0.467376		+	2.18246	0.00154622	-1.02962		28	28	27	41.6	41.6	41.6	108.44	0	190.54	4126700000	241	A6NFI3	A6NFI3	28.4157	28.4228	28.9231	28.0909	27.8343	27.9861	26.8635	27.2756	27.5382	28.0643	27.9936	27.9173	27.2582	27.3421
tr|A6NFS0|A6NFS0_HUMAN Zinc finger protein 275 OS=Homo sapiens OX=9606 GN=ZNF275 PE=1 SV=1;sp|Q9NSD4-2|ZN275_HUMAN Isoform 2 of Zinc finger protein 275 OS=Homo sapiens OX=9606 GN=ZNF275;sp|Q9NSD4|ZN275_HUMAN Zinc finger protein 275 OS=Homo sapiens OX=9606	Zinc finger protein 275	ZNF275		0.842269	0.136761	-1.11137			0.64963	0.116788	-0.630879			0.0549697	0.936367	-0.123375			0.284959	0.544377	0.509318		6	6	6	20.1	20.1	20.1	37.046	0	6.9573	135410000	11	A6NFS0;Q9NSD4-2;Q9NSD4	A6NFS0;Q9NSD4-2;Q9NSD4	25.0645	24.9895	26.3411	25.0912	23.6102	24.3596	24.8729	24.8166	24.813	23.3299	21.0959	21.4243	22.3682	21.2048
sp|P49750|YLPM1_HUMAN YLP motif-containing protein 1 OS=Homo sapiens OX=9606 GN=YLPM1 PE=1 SV=4;sp|P49750-1|YLPM1_HUMAN Isoform 1 of YLP motif-containing protein 1 OS=Homo sapiens OX=9606 GN=YLPM1;tr|F8VU51|F8VU51_HUMAN YLP motif-containing protein 1 OS=Ho	YLP motif-containing protein 1	YLPM1	+	2.84737	0.00390566	4.29705	+	+	2.5085	0.00147619	3.59947	+		0.978102	0.109185	3.47582		+	1.57062	0.00263449	2.55631	+	25	25	25	21.1	21.1	21.1	241.64	0	156.72	1947300000	71	P49750;P49750-1;F8VU51;H0YIQ2;P49750-3;H0YI23;U3KQT9	P49750;P49750-1;F8VU51;H0YIQ2;P49750-3	23.3388	22.4413	21.6187	26.9871	26.9989	26.3039	26.4362	25.545	26.216	24.0483	21.5424	23.1771	27.4063	28.3316
sp|Q96QT6|PHF12_HUMAN PHD finger protein 12 OS=Homo sapiens OX=9606 GN=PHF12 PE=1 SV=2;sp|Q96QT6-4|PHF12_HUMAN Isoform 4 of PHD finger protein 12 OS=Homo sapiens OX=9606 GN=PHF12;tr|C9J9G2|C9J9G2_HUMAN PHD finger protein 12 OS=Homo sapiens OX=9606 GN=PHF12	PHD finger protein 12	PHF12	+	2.74908	0.00368	4.23061	+	+	3.37861	0.0010354	5.60109	+		1.09335	0.0891865	2.75549		+	4.8685	0	4.51372	+	15	15	15	23	23	23	109.7	0	256.25	2573100000	96	Q96QT6;Q96QT6-4;C9J9G2;Q96QT6-2;Q96QT6-5;Q96QT6-3;K7EPF7;K7ERZ4;K7ENU0;K7EJ43	Q96QT6;Q96QT6-4;C9J9G2;Q96QT6-2;Q96QT6-5;Q96QT6-3	21.9854	20.6263	22.2741	26.1603	25.3356	26.0818	27.0876	27.1637	27.4378	22.009	22.0973	21.8417	26.0537	25.7826
sp|P61019|RAB2A_HUMAN Ras-related protein Rab-2A OS=Homo sapiens OX=9606 GN=RAB2A PE=1 SV=1;sp|P61019-2|RAB2A_HUMAN Isoform 2 of Ras-related protein Rab-2A OS=Homo sapiens OX=9606 GN=RAB2A;tr|E9PKL7|E9PKL7_HUMAN Ras-related protein Rab-2A OS=Homo sapiens O	Ras-related protein Rab-2A	RAB2A		NaN	1	0		+	3.20906	0.00116599	6.14345	+		0.717753	0.441052	-0.259062			1.1708	0.213682	-0.145714		12	12	12	68.4	68.4	68.4	23.545	0	171.21	3670200000	106	P61019;P61019-2;E9PKL7;H7C125;A0A3B3ITL1;Q8WUD1;E9PE37;H0YD31;Q8WUD1-2	P61019;P61019-2;E9PKL7;H7C125	20.8002	20.8401	22.7081	22.1448	22.4073	22.5425	27.5761	27.6225	27.5802	27.0784	27.1431	27.1741	26.6796	26.7428
sp|A6NHT5|HMX3_HUMAN Homeobox protein HMX3 OS=Homo sapiens OX=9606 GN=HMX3 PE=1 SV=1	Homeobox protein HMX3	HMX3		NaN	1	0			NaN	1	0			NaN	1	0		+	4.22137	0	5.3113	+	11	10	10	53.5	51.5	51.5	37.824	0	101.69	1860000000	28	A6NHT5	A6NHT5	21.947	22.3335	22.9145	22.2657	21.9574	21.6934	22.4582	22.4262	22.3153	22.183	21.8717	21.3014	23.3379	21.4896
sp|P55081|MFAP1_HUMAN Microfibrillar-associated protein 1 OS=Homo sapiens OX=9606 GN=MFAP1 PE=1 SV=2	Microfibrillar-associated protein 1	MFAP1	+	3.2743	0.00197468	4.22365	+	+	2.98826	0.00110795	3.4422	+	+	1.78572	0.024251	3.12511	+	+	3.00169	0	4.10466	+	9	9	9	27.1	27.1	27.1	51.958	0	94.883	2292900000	35	P55081	P55081	21.9932	22.2934	21.031	26.2045	25.6627	26.1213	25.1914	25.452	25.0008	22.1346	23.4705	22.2358	26.3616	26.4292
sp|Q9H0E9-2|BRD8_HUMAN Isoform 2 of Bromodomain-containing protein 8 OS=Homo sapiens OX=9606 GN=BRD8;tr|H7C128|H7C128_HUMAN Bromodomain-containing protein 8 (Fragment) OS=Homo sapiens OX=9606 GN=BRD8 PE=1 SV=1;tr|H7C179|H7C179_HUMAN Bromodomain-containing	Bromodomain-containing protein 8	BRD8	+	3.55031	0.000744186	4.19775	+	+	4.79575	0	7.13291	+		1.19351	0.0683064	3.67424		+	4.51389	0	5.19754	+	26	26	26	38.8	38.8	38.8	102.84	0	154.23	4834500000	105	Q9H0E9-2;H7C128;H7C179;B5MCW3;H7C127;Q9H0E9-4;Q9H0E9;Q9H0E9-3;H0YAH7;F8WBH2;C9JV05;F8WDX5;D6RID0;F8WCS7;H7C2P4;H0YA84	Q9H0E9-2;H7C128;H7C179;B5MCW3;H7C127;Q9H0E9-4;Q9H0E9;Q9H0E9-3	21.7623	21.2644	21.7479	26.4076	25.5399	25.4203	28.4387	28.537	29.1977	21.9002	22.1022	21.2932	27.177	26.5303
tr|A6NNZ3|A6NNZ3_HUMAN Zinc finger protein 419 OS=Homo sapiens OX=9606 GN=ZNF419 PE=1 SV=2;sp|Q96HQ0-6|ZN419_HUMAN Isoform 6 of Zinc finger protein 419 OS=Homo sapiens OX=9606 GN=ZNF419;sp|Q96HQ0-2|ZN419_HUMAN Isoform 2 of Zinc finger protein 419 OS=Homo s	Zinc finger protein 419	ZNF419		0.712378	0.24801	-0.480919		+	2.72929	0.00145571	-2.00646			NaN	1	0			NaN	1	0		7	2	2	14.5	5.2	5.2	50.725	0.0034286	2.6413	113390000	12	A6NNZ3;Q96HQ0-6;Q96HQ0-2;Q96HQ0-3;Q96HQ0-4;Q96HQ0;Q96HQ0-5;E5RHW2	A6NNZ3;Q96HQ0-6;Q96HQ0-2;Q96HQ0-3;Q96HQ0-4;Q96HQ0;Q96HQ0-5	24.1356	24.021	24.8845	24.1391	23.8272	23.632	22.3866	22.3857	22.2493	23.298	21.8935	22.048	21.549	22.1305
sp|Q13148|TADBP_HUMAN TAR DNA-binding protein 43 OS=Homo sapiens OX=9606 GN=TARDBP PE=1 SV=1;tr|A0A087WX29|A0A087WX29_HUMAN TAR DNA-binding protein 43 (Fragment) OS=Homo sapiens OX=9606 GN=TARDBP PE=1 SV=1;tr|A0A087WYY0|A0A087WYY0_HUMAN TAR DNA-binding pro	TAR DNA-binding protein 43	TARDBP;TDP43	+	2.29128	0.00562457	4.17285	+	+	2.71221	0.00113619	5.37094	+		0.684698	0.24629	2.17401		+	2.59254	0	5.36208	+	12	12	12	40.1	40.1	40.1	44.739	0	323.31	7127800000	121	Q13148;A0A087WX29;A0A087WYY0;A0A087X260;G3V162;B1AKP7;K7EN94;A0A0A0N0M3;K7EJM5;A0A087WXQ5;A0A087WV68;A0A087WXV3;A0A1W2PNU8;Q13148-4;A0A087WX67;A0A087WW61;A0A0A0MSV7;K7EJ99;A0A087WZC9;A0A087WYE7;K7EL26;A0A087WZM1;A0A087WTZ4	Q13148;A0A087WX29;A0A087WYY0;A0A087X260;G3V162;B1AKP7;K7EN94;A0A0A0N0M3;K7EJM5;A0A087WXQ5;A0A087WV68	22.7595	22.5864	24.8539	27.4456	27.3485	27.9243	29.0523	28.5809	28.6795	21.6172	24.3651	23.234	26.8002	26.0621
sp|A7KAX9-2|RHG32_HUMAN Isoform 2 of Rho GTPase-activating protein 32 OS=Homo sapiens OX=9606 GN=ARHGAP32;sp|A7KAX9|RHG32_HUMAN Rho GTPase-activating protein 32 OS=Homo sapiens OX=9606 GN=ARHGAP32 PE=1 SV=1	Rho GTPase-activating protein 32	ARHGAP32		0.286335	0.684358	-0.283071			0.760377	0.0749434	-0.738725			0.413578	0.460269	2.88643		+	1.94969	0.00154386	1.50885	+	21	21	21	20.9	20.9	20.9	190.97	0	59.67	623450000	34	A7KAX9-2;A7KAX9	A7KAX9-2;A7KAX9	21.493	22.4343	21.8798	21.7975	22.068	21.0923	21.886	20.7144	20.9905	20.12	21.0777	20.311	20.4045	20.4673
sp|A8K0R7|ZN839_HUMAN Zinc finger protein 839 OS=Homo sapiens OX=9606 GN=ZNF839 PE=2 SV=1;sp|A8K0R7-2|ZN839_HUMAN Isoform 2 of Zinc finger protein 839 OS=Homo sapiens OX=9606 GN=ZNF839;sp|A8K0R7-5|ZN839_HUMAN Isoform 3 of Zinc finger protein 839 OS=Homo sa	Zinc finger protein 839	ZNF839		NaN	1	0			0.434087	0.225637	1.31816			NaN	1	0		+	2.97578	0	3.39869	+	5	5	5	7.6	7.6	7.6	87.483	0	7.7208	1449100000	10	A8K0R7;A8K0R7-2;A8K0R7-5;H0YLB6;H0YM06;H0YMU1;H0YKI3;H0YNU6;H0YM94;H0YKY1	A8K0R7;A8K0R7-2;A8K0R7-5;H0YLB6;H0YM06;H0YMU1;H0YKI3	22.6709	22.5469	21.0598	22.4324	23.659	22.1217	21.3297	23.4408	25.4616	21.3961	21.8739	22.7273	21.5763	21.9603
tr|Q5JRI1|Q5JRI1_HUMAN Serine/arginine-rich-splicing factor 10 OS=Homo sapiens OX=9606 GN=SRSF10 PE=1 SV=1;sp|O75494-5|SRS10_HUMAN Isoform 5 of Serine/arginine-rich splicing factor 10 OS=Homo sapiens OX=9606 GN=SRSF10;sp|O75494-4|SRS10_HUMAN Isoform 4 of S	Serine/arginine-rich splicing factor 10	SRSF10;FUSIP1	+	2.95289	0.00316667	4.1388	+	+	2.13852	0.00222072	2.43174	+	+	1.85405	0.0201852	4.20413	+	+	2.28813	0.000505535	2.28441	+	6	6	6	44.2	44.2	44.2	20.913	0	46.733	907100000	31	Q5JRI1;O75494-5;O75494-4;O75494-6;O75494-3;O75494-2;O75494;Q6IQ42;Q8WXF0;R4GMP8	Q5JRI1;O75494-5;O75494-4;O75494-6;O75494-3;O75494-2;O75494;Q6IQ42	20.9478	22.1556	22.4844	25.9351	25.7595	26.3096	24.5071	24.2831	24.0928	21.4787	22.1966	22.7949	27.2362	27.3499
sp|P59923|ZN445_HUMAN Zinc finger protein 445 OS=Homo sapiens OX=9606 GN=ZNF445 PE=1 SV=1	Zinc finger protein 445	ZNF445	+	3.99006	0.00107865	4.10188	+	+	4.99117	0	6.19946	+		0.708322	0.229393	2.82043		+	3.80827	0	5.06454	+	28	27	26	34.2	34.2	33.1	118.96	0	165.9	3701300000	110	P59923;A0A087X0J9	P59923	22.1327	21.735	21.5383	25.8248	25.6044	26.2825	27.9351	27.798	28.2714	21.2947	22.4416	21.8031	26.5018	26.4063
tr|H7BY10|H7BY10_HUMAN 60S ribosomal protein L23a (Fragment) OS=Homo sapiens OX=9606 GN=RPL23A PE=1 SV=1;tr|K7EJV9|K7EJV9_HUMAN 60S ribosomal protein L23a (Fragment) OS=Homo sapiens OX=9606 GN=RPL23A PE=1 SV=1;tr|K7ERT8|K7ERT8_HUMAN 60S ribosomal protein L	60S ribosomal protein L23a	RPL23A		0.17353	0.829323	0.164502			0.746882	0.110358	-0.44538			1.1066	0.248873	0.342738			0.322334	0.677015	0.148428		6	6	6	33.5	33.5	33.5	17.692	0	14.377	1097700000	38	H7BY10;K7EJV9;K7ERT8;A8MUS3;P62750;K7EMA7	H7BY10;K7EJV9;K7ERT8;A8MUS3;P62750;K7EMA7	25.3948	25.9533	26.1168	26.4269	26.0783	25.4532	25.2438	25.7039	25.181	25.1099	25.2804	25.5544	25.7257	25.5243
tr|B9ZVT1|B9ZVT1_HUMAN RNA-binding protein 12B OS=Homo sapiens OX=9606 GN=RBM12B PE=1 SV=2;sp|Q8IXT5|RB12B_HUMAN RNA-binding protein 12B OS=Homo sapiens OX=9606 GN=RBM12B PE=1 SV=2	RNA-binding protein 12B	RBM12B	+	2.89303	0.00296585	4.09599	+	+	2.52162	0.00154622	3.01993	+	+	1.99717	0.0187473	4.25784	+	+	3.32656	0	3.04082	+	19	19	19	24	24	24	102.7	0	60.901	3931400000	142	B9ZVT1;Q8IXT5;E5RHG1;E5RJ83;E5RJV8;E5RJW8	B9ZVT1;Q8IXT5	22.4669	23.7079	23.9252	27.8909	27.3744	27.1226	26.4276	26.1623	26.5699	23.8956	23.8903	23.2888	28.812	28.895
tr|A8MZH8|A8MZH8_HUMAN Pituitary tumor-transforming gene 1 protein-interacting protein OS=Homo sapiens OX=9606 GN=PTTG1IP PE=1 SV=1;sp|P53801|PTTG_HUMAN Pituitary tumor-transforming gene 1 protein-interacting protein OS=Homo sapiens OX=9606 GN=PTTG1IP PE=1	Pituitary tumor-transforming gene 1 protein-interacting protein	PTTG1IP		NaN	1	0			NaN	1	0		+	1.65625	0.0356013	-2.69941		+	2.50621	0.000246914	-4.01444		2	2	2	27.1	27.1	27.1	11.598	0	8.5648	228270000	7	A8MZH8;P53801;A8MXQ1	A8MZH8;P53801;A8MXQ1	23.0468	22.3945	22.3118	23.0821	22.3674	22.7225	21.1454	21.96	22.4998	25.7544	25.5135	25.2763	21.6199	24.1381
sp|Q13185|CBX3_HUMAN Chromobox protein homolog 3 OS=Homo sapiens OX=9606 GN=CBX3 PE=1 SV=4	Chromobox protein homolog 3	CBX3	+	4.77364	0	4.05585	+	+	3.85421	0.00099422	3.92433	+	+	3.38964	0.0172632	4.24235	+	+	4.03888	0	4.74937	+	6	5	4	36.6	27.9	21.3	20.811	0	83.097	1914500000	53	Q13185;C9JMM0;B8ZZ43;S4R2Y4	Q13185	22.6681	22.3576	22.8721	26.8278	26.6569	26.5806	26.3575	26.2964	27.0169	21.7656	21.2565	21.2953	25.9074	26.1507
sp|Q9BVJ6|UT14A_HUMAN U3 small nucleolar RNA-associated protein 14 homolog A OS=Homo sapiens OX=9606 GN=UTP14A PE=1 SV=1;sp|Q9BVJ6-3|UT14A_HUMAN Isoform 3 of U3 small nucleolar RNA-associated protein 14 homolog A OS=Homo sapiens OX=9606 GN=UTP14A;sp|Q9BVJ6	U3 small nucleolar RNA-associated protein 14 homolog A	UTP14A	+	3.61194	0.000793388	4.04099	+	+	3.4286	0.000979079	3.96877	+	+	2.6184	0.0112353	4.9663	+	+	5.30634	0	7.5971	+	34	34	34	51.6	51.6	51.6	87.977	0	323.31	12931000000	225	Q9BVJ6;Q9BVJ6-3;Q9BVJ6-2;Q5TAP6;X6RJY0	Q9BVJ6;Q9BVJ6-3;Q9BVJ6-2	22.9329	23.6809	22.6514	27.1447	27.3118	26.9316	27.1447	27.3193	26.7074	21.7943	22.3841	22.5253	27.7153	28.0566
sp|Q9BUL5-4|PHF23_HUMAN Isoform 4 of PHD finger protein 23 OS=Homo sapiens OX=9606 GN=PHF23;sp|Q9BUL5|PHF23_HUMAN PHD finger protein 23 OS=Homo sapiens OX=9606 GN=PHF23 PE=1 SV=1;tr|I3L4Q4|I3L4Q4_HUMAN PHD finger protein 23 (Fragment) OS=Homo sapiens OX=96	PHD finger protein 23	PHF23	+	2.66667	0.00393277	4.02695	+	+	2.83769	0.00120896	2.84706	+	+	2.43971	0.0151045	2.01152	+	+	1.21243	0.0104088	1.09526	+	8	8	8	27.1	27.1	27.1	43.447	0	8.5054	353100000	22	Q9BUL5-4;Q9BUL5;I3L4Q4;I3L0Y2;A0A087WVQ2;Q9BUL5-2;Q9BUL5-3;I3L1N0;I3L410;I3L2W6;I3L0X3	Q9BUL5-4;Q9BUL5;I3L4Q4;I3L0Y2;A0A087WVQ2;Q9BUL5-2;Q9BUL5-3;I3L1N0	21.3185	22.4789	21.5515	26.5465	25.8888	24.9945	24.7923	24.4991	24.5988	22.5398	23.3252	22.2526	24.8673	24.6464
tr|B0YIW6|B0YIW6_HUMAN Coatomer subunit delta OS=Homo sapiens OX=9606 GN=ARCN1 PE=1 SV=1;sp|P48444|COPD_HUMAN Coatomer subunit delta OS=Homo sapiens OX=9606 GN=ARCN1 PE=1 SV=1;sp|P48444-2|COPD_HUMAN Isoform 2 of Coatomer subunit delta OS=Homo sapiens OX=96	Coatomer subunit delta	ARCN1		NaN	1	0			NaN	1	0			NaN	1	0		+	3.00004	0	3.32509	+	5	5	5	13.8	13.8	13.8	61.626	0	20.02	321100000	9	B0YIW6;P48444;P48444-2;Q6P1Q5;E9PK34	B0YIW6;P48444;P48444-2	21.7834	21.8154	22.7928	22.1315	20.782	21.4349	22.4062	22.3617	21.3794	21.7229	21.3103	20.7336	22.6511	22.3521
sp|Q9UJ78|ZMYM5_HUMAN Zinc finger MYM-type protein 5 OS=Homo sapiens OX=9606 GN=ZMYM5 PE=1 SV=4;sp|Q9UJ78-5|ZMYM5_HUMAN Isoform 5 of Zinc finger MYM-type protein 5 OS=Homo sapiens OX=9606 GN=ZMYM5	Zinc finger MYM-type protein 5	ZMYM5	+	3.5655	0.000732824	3.97869	+	+	4.75518	0	5.15637	+		0.954023	0.129927	1.95853		+	3.87429	0	4.21251	+	15	14	14	34.7	32	32	74.817	0	50.167	1823200000	55	Q9UJ78;Q9UJ78-5;Q9UJ78-1;Q9UJ78-2;Q9UJ78-3	Q9UJ78;Q9UJ78-5	21.8475	22.3639	21.7107	26.1724	26.2579	25.4279	26.9987	27.2712	27.1213	21.3871	21.9945	22.2644	24.4921	25.0147
sp|P31948|STIP1_HUMAN Stress-induced-phosphoprotein 1 OS=Homo sapiens OX=9606 GN=STIP1 PE=1 SV=1;sp|P31948-2|STIP1_HUMAN Isoform 2 of Stress-induced-phosphoprotein 1 OS=Homo sapiens OX=9606 GN=STIP1;sp|P31948-3|STIP1_HUMAN Isoform 3 of Stress-induced-phosp	Stress-induced-phosphoprotein 1	STIP1	+	3.0446	0.00273224	3.97705	+	+	2.68629	0.00125795	3.30982	+		0.629628	0.27685	1.87189		+	3.18414	0	2.4508	+	9	9	9	19.2	19.2	19.2	62.639	0	27.439	1105500000	40	P31948;P31948-2;P31948-3;F5H783;F5GXD8;H0YGI8	P31948;P31948-2;P31948-3;F5H783	22.5562	22.0725	21.0384	25.9513	25.8186	25.8285	25.1407	25.4401	25.0158	22.9125	22.227	22.9855	25.9097	25.8845
tr|B3KS98|B3KS98_HUMAN Eukaryotic translation initiation factor 3 subunit H OS=Homo sapiens OX=9606 GN=EIF3H PE=1 SV=1;sp|O15372|EIF3H_HUMAN Eukaryotic translation initiation factor 3 subunit H OS=Homo sapiens OX=9606 GN=EIF3H PE=1 SV=1;tr|A0A087WZK9|A0A08	Eukaryotic translation initiation factor 3 subunit H	EIF3H		NaN	1	0			0.146111	0.820445	0.272899			NaN	1	0		+	3.00077	0	2.65754	+	5	5	5	19.4	19.4	19.4	41.581	0	56.787	430820000	19	B3KS98;O15372;A0A087WZK9;E5RFW7;E5RFH0;E5RJT0;E5RHC7;E5RH59;E5RGU4	B3KS98;O15372;A0A087WZK9	22.2649	23.7801	21.5671	22.1692	21.5747	21.7993	23.0477	23.0434	22.3398	22.1288	22.4483	21.5281	21.6026	20.7787
sp|Q9H2P0|ADNP_HUMAN Activity-dependent neuroprotector homeobox protein OS=Homo sapiens OX=9606 GN=ADNP PE=1 SV=1;tr|A0A669KBJ7|A0A669KBJ7_HUMAN Activity-dependent neuroprotector homeobox protein OS=Homo sapiens OX=9606 GN=ADNP PE=1 SV=1;tr|A0A2R8Y6X0|A0A2	Activity-dependent neuroprotector homeobox protein	ADNP	+	1.15939	0.0461508	3.95766	+	+	1.30562	0.00734443	4.61631	+		1.04834	0.0959274	2.7193		+	2.79902	0	3.97782	+	37	37	37	44.4	44.4	44.4	123.56	0	312.54	8737600000	239	Q9H2P0;A0A669KBJ7;A0A2R8Y6X0;A0A2R8YCL6	Q9H2P0;A0A669KBJ7;A0A2R8Y6X0	21.3748	25.1403	26.8007	28.4196	28.369	28.4001	28.6206	28.6711	29.873	24.9625	24.0222	23.1758	28.1221	27.6117
sp|O15042-2|SR140_HUMAN Isoform 2 of U2 snRNP-associated SURP motif-containing protein OS=Homo sapiens OX=9606 GN=U2SURP;sp|O15042|SR140_HUMAN U2 snRNP-associated SURP motif-containing protein OS=Homo sapiens OX=9606 GN=U2SURP PE=1 SV=2;tr|E7ET15|E7ET15_HU	U2 snRNP-associated SURP motif-containing protein	U2SURP	+	1.1887	0.0429959	3.9568	+	+	1.54403	0.00430252	5.21454	+	+	2.27317	0.0132	6.22286	+	+	4.82559	0	7.05756	+	33	33	33	46.4	46.4	46.4	118.23	0	323.31	15293000000	261	O15042-2;O15042;E7ET15;O15042-3;H0Y8D9;E7EW00;H7C4V2;C9J5L1;C9JDJ7;U3KPT1	O15042-2;O15042;E7ET15;O15042-3	26.6189	22.2189	21.7228	27.8038	27.3652	27.2619	28.658	28.7273	28.8189	22.6825	22.5831	21.8957	29.6761	29.7518
tr|B3KY94|B3KY94_HUMAN CDP-diacylglycerol--inositol 3-phosphatidyltransferase OS=Homo sapiens OX=9606 GN=CDIPT PE=1 SV=1;sp|O14735-3|CDIPT_HUMAN Isoform 3 of CDP-diacylglycerol--inositol 3-phosphatidyltransferase OS=Homo sapiens OX=9606 GN=CDIPT;sp|O14735|	CDP-diacylglycerol--inositol 3-phosphatidyltransferase	CDIPT		NaN	1	0			NaN	1	0			0.545309	0.381529	-0.822165		+	1.01102	0.0141707	-1.73353		2	2	2	10.1	10.1	10.1	25.946	0	5.7934	325680000	17	B3KY94;O14735-3;O14735;H3BUR9	B3KY94;O14735-3;O14735;H3BUR9	21.6087	21.096	22.1515	23.0225	21.5208	21.7754	21.9024	20.8913	22.1179	24.5271	24.5236	25.096	24.7597	22.6471
sp|Q5T5X7|BEND3_HUMAN BEN domain-containing protein 3 OS=Homo sapiens OX=9606 GN=BEND3 PE=1 SV=1	BEN domain-containing protein 3	BEND3	+	2.47749	0.00432959	3.9444	+	+	3.81991	0.000839858	6.85061	+	+	1.54235	0.036506	3.98331	+	+	3.23677	0	4.85917	+	31	31	31	51.8	51.8	51.8	94.474	0	323.31	8107600000	195	Q5T5X7	Q5T5X7	21.5186	20.8266	22.448	26.2764	24.8193	25.5307	28.5087	28.1846	28.6517	24.2663	22.6446	23.4978	29.187	27.7431
tr|B4DN67|B4DN67_HUMAN Kin of IRRE-like protein 1 OS=Homo sapiens OX=9606 GN=KIRREL1 PE=1 SV=1;sp|Q96J84|KIRR1_HUMAN Kin of IRRE-like protein 1 OS=Homo sapiens OX=9606 GN=KIRREL1 PE=1 SV=2;sp|Q96J84-2|KIRR1_HUMAN Isoform 2 of Kin of IRRE-like protein 1 OS=	Kin of IRRE-like protein 1	KIRREL		NaN	1	0			0.165674	0.779637	0.404922			0.396959	0.603539	-0.299793			0.684703	0.0659365	-1.04246		7	7	7	13.4	13.4	13.4	72.721	0	16.782	332850000	15	B4DN67;Q96J84;Q96J84-2;Q5W0G0;Q5W0F9;Q96J84-3	B4DN67;Q96J84;Q96J84-2;Q5W0G0;Q5W0F9;Q96J84-3	23.1704	22.4674	22.4259	21.2229	22.1606	22.5511	23.8772	24.0818	21.3196	23.9203	24.4114	24.0731	23.6725	23.4444
sp|Q96PK6|RBM14_HUMAN RNA-binding protein 14 OS=Homo sapiens OX=9606 GN=RBM14 PE=1 SV=2	RNA-binding protein 14	RBM14	+	3.51184	0.00070073	3.93524	+	+	3.96085	0.00076129	4.19713	+		0.60723	0.281994	2.67507		+	4.67995	0	4.64005	+	14	14	11	25.7	25.7	19.7	69.491	0	59.406	2582500000	49	Q96PK6;Q96PK6-2;A0A0A6YYI9;F8WDX3;A0A0A0MSL8;B8ZZ74;Q96PK6-3;Q96PK6-4	Q96PK6	21.9944	21.8065	22.6175	26.1393	26.4393	25.6455	26.5059	26.4171	26.0868	22.2937	21.6397	21.8809	26.705	26.45
sp|Q86YP4-2|P66A_HUMAN Isoform 2 of Transcriptional repressor p66-alpha OS=Homo sapiens OX=9606 GN=GATAD2A;sp|Q86YP4|P66A_HUMAN Transcriptional repressor p66-alpha OS=Homo sapiens OX=9606 GN=GATAD2A PE=1 SV=1;sp|Q86YP4-3|P66A_HUMAN Isoform 3 of Transcripti	Transcriptional repressor p66-alpha	GATAD2A	+	3.71733	0.000849558	3.9342	+	+	4.25347	0.000576577	4.29089	+	+	3.12599	0.0136429	2.16796	+	+	3.7226	0	2.20874	+	12	12	11	28.8	28.8	27	65.225	0	83.559	1195400000	57	Q86YP4-2;Q86YP4;Q86YP4-3;C9JHD7;C9JJK9;C9JVY3;V9GY85;H7C3H1;C9JMI3;C9JGN4;V9GYX5	Q86YP4-2;Q86YP4;Q86YP4-3	22.1598	22.8444	22.1174	26.5862	25.9617	26.3763	26.6044	26.6649	26.7249	22.7329	22.2388	22.4124	24.8704	24.7478
sp|O00567|NOP56_HUMAN Nucleolar protein 56 OS=Homo sapiens OX=9606 GN=NOP56 PE=1 SV=4;tr|A0A494C128|A0A494C128_HUMAN Nucleolar protein 56 OS=Homo sapiens OX=9606 GN=NOP56 PE=1 SV=1;tr|Q5JXT2|Q5JXT2_HUMAN Nucleolar protein 56 (Fragment) OS=Homo sapiens OX=9	Nucleolar protein 56	NOP56	+	3.50436	0.000690647	3.92744	+	+	4.55454	0	6.42592	+	+	2.43422	0.0138333	4.5085	+	+	3.06811	0	3.55936	+	24	24	24	59.6	59.6	59.6	66.049	0	307.27	6628500000	199	O00567;A0A494C128;Q5JXT2;H0YDU4;H0Y653	O00567;A0A494C128;Q5JXT2	22.4593	22.0885	21.5208	26.1341	26.1646	25.5523	28.6917	28.2908	28.364	23.308	23.8962	24.495	29.2111	28.9064
tr|B4DWH1|B4DWH1_HUMAN Peroxisomal membrane protein 4 OS=Homo sapiens OX=9606 GN=PXMP4 PE=1 SV=1;sp|Q9Y6I8-2|PXMP4_HUMAN Isoform 2 of Peroxisomal membrane protein 4 OS=Homo sapiens OX=9606 GN=PXMP4;sp|Q9Y6I8|PXMP4_HUMAN Peroxisomal membrane protein 4 OS=Ho	Peroxisomal membrane protein 4	PXMP4		NaN	1	0			NaN	1	0			0.624844	0.290087	-1.37886		+	0.923212	0.0229805	-1.46398		3	3	3	14.6	14.6	14.6	15.69	0	12.638	163480000	18	B4DWH1;Q9Y6I8-2;Q9Y6I8	B4DWH1;Q9Y6I8-2;Q9Y6I8	21.4153	21.072	20.8744	21.9693	22.1193	21.2096	21.9453	22.7103	21.7618	23.8299	23.1416	24.1988	20.4762	23.0524
sp|O15164-2|TIF1A_HUMAN Isoform Short of Transcription intermediary factor 1-alpha OS=Homo sapiens OX=9606 GN=TRIM24;sp|O15164|TIF1A_HUMAN Transcription intermediary factor 1-alpha OS=Homo sapiens OX=9606 GN=TRIM24 PE=1 SV=3	Transcription intermediary factor 1-alpha	TRIM24	+	1.3291	0.0344525	3.92002	+	+	1.73935	0.00329519	5.34215	+		1.3056	0.0544883	4.04481		+	3.06094	0	6.1633	+	31	30	29	43.9	42.7	42.7	113.02	0	323.31	9043800000	177	O15164-2;O15164	O15164-2;O15164	26.7274	22.5306	22.7083	28.077	27.5763	28.0732	29.2301	29.0342	29.7285	22.9448	20.7051	22.5398	27.6597	27.09
tr|B4E1G1|B4E1G1_HUMAN Derlin OS=Homo sapiens OX=9606 GN=DERL1 PE=1 SV=1;sp|Q9BUN8-2|DERL1_HUMAN Isoform 2 of Derlin-1 OS=Homo sapiens OX=9606 GN=DERL1;sp|Q9BUN8|DERL1_HUMAN Derlin-1 OS=Homo sapiens OX=9606 GN=DERL1 PE=1 SV=1	Derlin-1	DERL1		NaN	1	0			NaN	1	0			0.525154	0.439726	-0.545546		+	1.21133	0.00854675	-1.39602		3	3	3	21.9	21.9	21.9	17.033	0	18.434	251170000	22	B4E1G1;Q9BUN8-2;Q9BUN8;E5RGY0	B4E1G1;Q9BUN8-2;Q9BUN8	20.1132	22.836	22.5348	21.9048	20.9934	22.1292	22.6564	22.0912	22.0461	24.5297	24.0115	24.8435	24.6793	23.6474
sp|Q96SI1|KCD15_HUMAN BTB/POZ domain-containing protein KCTD15 OS=Homo sapiens OX=9606 GN=KCTD15 PE=1 SV=1;sp|Q96SI1-2|KCD15_HUMAN Isoform 2 of BTB/POZ domain-containing protein KCTD15 OS=Homo sapiens OX=9606 GN=KCTD15;tr|K7EN63|K7EN63_HUMAN BTB/POZ domain	BTB/POZ domain-containing protein KCTD15	KCTD15	+	4.67767	0	3.91199	+	+	5.03783	0	3.94531	+		0.215353	0.724361	0.837619		+	1.67108	0.00178471	3.0519	+	10	9	9	42.4	34.3	34.3	31.942	0	27.091	1948400000	50	Q96SI1;Q96SI1-2;K7EN63;V9GYY8;K7EM48;K7EPF0;K7EQS3;K7EIF1;REV__Q14999;REV__A0A669KBH4;REV__Q14999-2	Q96SI1;Q96SI1-2;K7EN63;V9GYY8	22.1432	22.2341	22.3808	26.3864	25.8662	26.2416	26.0317	26.1301	26.4323	24.7827	22.1959	22.414	25.2287	25.2375
tr|B5MBX0|B5MBX0_HUMAN Sororin OS=Homo sapiens OX=9606 GN=CDCA5 PE=1 SV=1;sp|Q96FF9|CDCA5_HUMAN Sororin OS=Homo sapiens OX=9606 GN=CDCA5 PE=1 SV=1	Sororin	CDCA5		NaN	1	0			NaN	1	0			NaN	1	0		+	1.47652	0.00655345	0.910173	+	2	2	2	7.2	7.2	7.2	33.734	0	4.3274	148780000	7	B5MBX0;Q96FF9	B5MBX0;Q96FF9	23.933	22.9483	22.8819	22.1589	22.1724	22.0234	23.1666	22.7797	21.2989	22.9173	22.7787	22.1023	21.5361	20.7931
sp|P16422|EPCAM_HUMAN Epithelial cell adhesion molecule OS=Homo sapiens OX=9606 GN=EPCAM PE=1 SV=2;tr|B5MCA4|B5MCA4_HUMAN Epithelial cell adhesion molecule OS=Homo sapiens OX=9606 GN=EPCAM PE=1 SV=1	Epithelial cell adhesion molecule	EPCAM		NaN	1	0			0.254175	0.634376	0.415599			0.302275	0.606601	1.5488		+	1.30568	0.00623239	-1.68323		12	12	12	47.8	47.8	47.8	34.932	0	90.069	1804700000	31	P16422;B5MCA4;C9JKY3	P16422;B5MCA4	22.7594	22.7127	20.9978	21.8115	21.3251	21.8113	23.0375	22.6474	22.0318	25.3024	24.5136	24.6853	24.241	24.3855
sp|Q13151|ROA0_HUMAN Heterogeneous nuclear ribonucleoprotein A0 OS=Homo sapiens OX=9606 GN=HNRNPA0 PE=1 SV=1	Heterogeneous nuclear ribonucleoprotein A0	HNRNPA0	+	3.89825	0.000979592	3.89902	+	+	5.55067	0	5.84947	+		0.682495	0.2439	2.45983		+	4.00032	0	6.17124	+	10	10	10	43.9	43.9	43.9	30.84	0	283.77	7487800000	88	Q13151	Q13151	22.1557	22.5997	22.422	26.2672	26.7064	25.9009	28.394	28.2223	28.1096	22.2373	21.8489	23.1514	26.7375	26.1758
tr|B5MCR8|B5MCR8_HUMAN Solute carrier family 30 (Zinc transporter), member 6, isoform CRA_b OS=Homo sapiens OX=9606 GN=SLC30A6 PE=1 SV=1;sp|Q6NXT4-4|ZNT6_HUMAN Isoform 4 of Zinc transporter 6 OS=Homo sapiens OX=9606 GN=SLC30A6;sp|Q6NXT4-3|ZNT6_HUMAN Isofor	Zinc transporter 6	SLC30A6		0.234772	0.712567	-0.485402			0.0558973	0.935126	-0.105132			0.361745	0.544468	1.23119		+	1.35619	0.00433161	2.42894	+	3	3	3	15.2	15.2	15.2	42.509	0	27.671	603410000	12	B5MCR8;Q6NXT4-4;Q6NXT4-3;Q6NXT4;Q6NXT4-2	B5MCR8;Q6NXT4-4;Q6NXT4-3;Q6NXT4;Q6NXT4-2	22.3649	24.0214	23.4715	21.6648	23.9173	22.8196	23.5757	22.3229	23.6438	21.7045	21.6323	24.0647	21.7655	23.5116
sp|Q32MZ4-3|LRRF1_HUMAN Isoform 3 of Leucine-rich repeat flightless-interacting protein 1 OS=Homo sapiens OX=9606 GN=LRRFIP1;sp|Q32MZ4-2|LRRF1_HUMAN Isoform 2 of Leucine-rich repeat flightless-interacting protein 1 OS=Homo sapiens OX=9606 GN=LRRFIP1;sp|Q32	Leucine-rich repeat flightless-interacting protein 1	LRRFIP1	+	4.15531	0	3.87601	+	+	0.9322	0.0253929	2.08145	+		0.351873	0.560777	1.0886		+	1.05049	0.0135906	1.41609	+	9	9	9	17.6	17.6	17.6	82.688	0	51.813	349880000	18	Q32MZ4-3;Q32MZ4-2;Q32MZ4;Q32MZ4-4;C9JSU1;Q9Y608-2;Q9Y608-4;Q9Y608-5;Q9Y608	Q32MZ4-3;Q32MZ4-2;Q32MZ4	21.5659	21.4433	20.9191	25.2339	24.9719	25.3505	24.4971	24.332	21.3436	22.149	22.4916	22.182	24.4353	24.8412
sp|P29590-11|PML_HUMAN Isoform PML-11 of Protein PML OS=Homo sapiens OX=9606 GN=PML	Protein PML	PML	+	3.08259	0.00277778	3.86825	+	+	3.90751	0.000816609	5.1699	+	+	4.38612	0.0366667	5.48317	+	+	5.0284	0	5.76972	+	51	2	0	68.6	3.4	0	92.563	0	251.41	4502600000	58	P29590-11	P29590-11	21.9083	23.072	22.7609	26.8658	26.4743	26.0059	27.6866	27.7215	27.8429	21.8782	21.8699	22.1185	27.5674	27.828
tr|B5MDU6|B5MDU6_HUMAN Lipid droplet-associated hydrolase OS=Homo sapiens OX=9606 GN=LDAH PE=1 SV=1;sp|Q9H6V9|LDAH_HUMAN Lipid droplet-associated hydrolase OS=Homo sapiens OX=9606 GN=LDAH PE=1 SV=1;sp|Q9H6V9-2|LDAH_HUMAN Isoform 2 of Lipid droplet-associat	UPF0554 protein C2orf43	LDAH;C2orf43		NaN	1	0			0.148937	0.845809	-0.131979			0.819964	0.2441	-0.70128		+	1.2477	0.00733414	-1.59126		3	3	3	12.7	12.7	12.7	42.668	0	14.721	108310000	16	B5MDU6;Q9H6V9;Q9H6V9-2;B5MCU4;A0A0A0MSH6;Q9H6V9-4;Q9H6V9-3;C9JHU6;B5MCE2;C9JUM0;B4DRG3	B5MDU6;Q9H6V9;Q9H6V9-2;B5MCU4;A0A0A0MSH6;Q9H6V9-4;Q9H6V9-3	22.0414	23.1014	22.2495	21.351	20.4869	22.1212	22.2325	22.4448	22.3191	23.3968	23.1752	23.5387	22.0568	22.5799
tr|B7WP74|B7WP74_HUMAN Pre-mRNA-splicing factor CWC22 homolog (Fragment) OS=Homo sapiens OX=9606 GN=CWC22 PE=1 SV=1;sp|Q9HCG8|CWC22_HUMAN Pre-mRNA-splicing factor CWC22 homolog OS=Homo sapiens OX=9606 GN=CWC22 PE=1 SV=3	Pre-mRNA-splicing factor CWC22 homolog	CWC22		NaN	1	0			NaN	1	0			NaN	1	0		+	0.813743	0.0355361	1.27165	+	4	4	4	6.2	6.2	6.2	85.576	0	6.0776	136210000	3	B7WP74;Q9HCG8	B7WP74;Q9HCG8	21.936	21.6625	22.4687	21.5834	22.8335	22.5322	21.0287	20.8014	20.7203	20.57	21.935	23.049	20.2721	21.391
sp|Q14320|FA50A_HUMAN Protein FAM50A OS=Homo sapiens OX=9606 GN=FAM50A PE=1 SV=2;tr|B0S8I6|B0S8I6_HUMAN Protein FAM50A (Fragment) OS=Homo sapiens OX=9606 GN=FAM50A PE=1 SV=1	Protein FAM50A	FAM50A	+	3.0002	0.00321693	3.85878	+	+	3.26123	0.00111412	4.47433	+		0.576667	0.298904	2.74715		+	3.43854	0	6.58039	+	11	11	11	33.3	33.3	33.3	40.241	0	52.197	7235200000	60	Q14320;B0S8I6;Q9Y247	Q14320;B0S8I6	22.4703	23.0405	21.5438	26.4157	26.1203	26.0949	26.8655	26.951	26.661	21.1117	23.1318	22.3212	27.3459	26.5783
sp|Q13595-4|TRA2A_HUMAN Isoform 4 of Transformer-2 protein homolog alpha OS=Homo sapiens OX=9606 GN=TRA2A;sp|Q13595-3|TRA2A_HUMAN Isoform 3 of Transformer-2 protein homolog alpha OS=Homo sapiens OX=9606 GN=TRA2A;sp|Q13595|TRA2A_HUMAN Transformer-2 protein	Transformer-2 protein homolog alpha	TRA2A	+	4.15501	0	3.85543	+	+	2.98535	0.00111735	2.34783	+	+	1.97293	0.0188691	3.89714	+	+	4.84301	0	3.27343	+	15	15	14	71.7	71.7	66.7	20.589	0	120.43	8632400000	165	Q13595-4;Q13595-3;Q13595;Q13595-2;H7BXF3	Q13595-4;Q13595-3;Q13595;Q13595-2	25.5351	25.3442	26.0658	29.582	29.563	29.3664	28.0105	27.694	28.2841	24.8478	24.8475	24.4628	29.738	29.1674
sp|B7ZAQ6-2|GPHRA_HUMAN Isoform 2 of Golgi pH regulator A OS=Homo sapiens OX=9606 GN=GPR89A;sp|B7ZAQ6-3|GPHRA_HUMAN Isoform 3 of Golgi pH regulator A OS=Homo sapiens OX=9606 GN=GPR89A;sp|P0CG08|GPHRB_HUMAN Golgi pH regulator B OS=Homo sapiens OX=9606 GN=GP	Golgi pH regulator A;Golgi pH regulator B	GPR89A;GPR89B		NaN	1	0			NaN	1	0			0.832963	0.19082	-1.46763		+	4.12026	0	-3.0778		3	3	3	11.6	11.6	11.6	38.484	0	15.535	289020000	27	B7ZAQ6-2;B7ZAQ6-3;P0CG08;B7ZAQ6;A0A087WW78;A0A087WW82;U3KPV2;E9PKY3	B7ZAQ6-2;B7ZAQ6-3;P0CG08;B7ZAQ6;A0A087WW78;A0A087WW82;U3KPV2;E9PKY3	20.5745	22.0064	22.4585	21.3665	20.755	22.8484	21.604	23.039	22.1615	24.9075	24.4663	25.04	21.7433	24.0432
tr|A0A499FJY3|A0A499FJY3_HUMAN RNA-binding protein 15 OS=Homo sapiens OX=9606 GN=RBM15 PE=1 SV=1;tr|A0A087WWP4|A0A087WWP4_HUMAN RNA-binding protein 15 OS=Homo sapiens OX=9606 GN=RBM15 PE=1 SV=1;sp|Q96T37-4|RBM15_HUMAN Isoform 4 of RNA-binding protein 15 OS	Putative RNA-binding protein 15	RBM15	+	4.67862	0	3.81243	+	+	4.14396	0.000988506	2.71773	+	+	1.47277	0.0418261	3.81589	+	+	2.06393	0.000571429	3.47772	+	15	14	14	24.8	24	24	101.31	0	141.26	1185700000	67	A0A499FJY3;A0A087WWP4;Q96T37-4;Q96T37-2;Q96T37-3;Q96T37;A0A494C001	A0A499FJY3;A0A087WWP4;Q96T37-4;Q96T37-2;Q96T37-3;Q96T37;A0A494C001	22.1422	22.403	22.6959	26.294	26.1494	26.235	25.1216	25.1091	25.1636	21.4773	23.1647	21.075	26.6893	26.7867
sp|Q17RY0|CPEB4_HUMAN Cytoplasmic polyadenylation element-binding protein 4 OS=Homo sapiens OX=9606 GN=CPEB4 PE=1 SV=1;sp|Q17RY0-2|CPEB4_HUMAN Isoform 2 of Cytoplasmic polyadenylation element-binding protein 4 OS=Homo sapiens OX=9606 GN=CPEB4;tr|B7ZLQ8|B7Z	Cytoplasmic polyadenylation element-binding protein 4	CPEB4	+	1.41055	0.0380463	-1.40053		+	2.52546	0.00153653	-2.82496			1.59376	0.0742481	-0.66371		+	2.38153	0.00109001	-1.11802		24	24	24	37.7	37.7	37.7	80.151	0	323.31	5638700000	200	Q17RY0;Q17RY0-2;B7ZLQ8;E5RJM0;Q17RY0-3;E5RFP2;A0A590UJI5;Q7Z5Q1-9;Q7Z5Q1-4;A0A5K1VW93;A0A5K1VW71;A0A5K1VW79;A0A5K1VW61;Q7Z5Q1-6;Q7Z5Q1-3;Q7Z5Q1;Q7Z5Q1-5;Q8NE35-2;Q8NE35;Q7Z5Q1-7;Q7Z5Q1-8;H0Y9D9;H0YBG1;A0A590UJN2	Q17RY0;Q17RY0-2;B7ZLQ8;E5RJM0;Q17RY0-3;E5RFP2;A0A590UJI5	27.3798	27.262	28.4834	26.8061	26.1	26.0175	24.8925	25.2287	24.529	28.5182	28.5125	29.0532	27.9515	27.9796
tr|B8ZZQ6|B8ZZQ6_HUMAN Prothymosin alpha OS=Homo sapiens OX=9606 GN=PTMA PE=1 SV=1;tr|B8ZZA1|B8ZZA1_HUMAN Prothymosin alpha OS=Homo sapiens OX=9606 GN=PTMA PE=1 SV=1;tr|B8ZZW7|B8ZZW7_HUMAN Prothymosin alpha OS=Homo sapiens OX=9606 GN=PTMA PE=1 SV=1;tr|H7C2	Prothymosin alpha;Prothymosin alpha, N-terminally processed;Thymosin alpha-1	PTMA		0.982251	0.0902617	1.77752			NaN	1	0			NaN	1	0			NaN	1	0		2	2	2	14	14	14	11.758	0.00031949	4.1935	25035000	10	B8ZZQ6;B8ZZA1;B8ZZW7;H7C2N1;P06454-2;P06454	B8ZZQ6;B8ZZA1;B8ZZW7;H7C2N1;P06454-2;P06454	21.4087	23.4177	20.5718	23.4202	23.6272	23.6834	21.5665	21.2323	21.2835	21.8729	22.0576	22.7469	23.0668	21.5635
tr|A0A0A0MR39|A0A0A0MR39_HUMAN Myelin expression factor 2 OS=Homo sapiens OX=9606 GN=MYEF2 PE=1 SV=1;sp|Q9P2K5|MYEF2_HUMAN Myelin expression factor 2 OS=Homo sapiens OX=9606 GN=MYEF2 PE=1 SV=3;tr|A0A087WUT0|A0A087WUT0_HUMAN Myelin expression factor 2 OS=Ho	Myelin expression factor 2	MYEF2	+	2.76963	0.00366372	3.7989	+	+	2.69315	0.001095	4.36316	+		0.622557	0.270606	2.99976		+	3.33169	0	5.04354	+	14	14	14	32.7	32.7	32.7	64.149	0	47.87	3155200000	31	A0A0A0MR39;Q9P2K5;A0A087WUT0;A0A0A0MQW0;Q9P2K5-2;A0A0C4DGV1;H0YN19;H0YKS1;Q9P2K5-3;A0A087WWC8;Q9P2K5-4	A0A0A0MR39;Q9P2K5;A0A087WUT0;A0A0A0MQW0;Q9P2K5-2;A0A0C4DGV1;H0YN19;H0YKS1;Q9P2K5-3	22.1215	22.6627	21.0182	25.9822	25.7596	25.4573	26.9567	25.6687	26.2665	23.021	21.4378	22.447	27.5051	27.3309
sp|Q03252|LMNB2_HUMAN Lamin-B2 OS=Homo sapiens OX=9606 GN=LMNB2 PE=1 SV=4	Lamin-B2	LMNB2	+	3.92588	0.000989691	3.77925	+	+	2.8595	0.00148908	1.75322	+	+	2.10845	0.0148	3.69592	+	+	2.40503	0.000331984	2.83862	+	28	26	26	53.1	51.5	51.5	69.948	0	236.22	3994200000	169	Q03252	Q03252	26.0913	25.9952	25.8407	30.2412	29.5214	29.5023	28.0609	27.3421	27.7838	24.3563	23.6154	22.7419	27.8583	27.8438
sp|P05412|JUN_HUMAN Transcription factor AP-1 OS=Homo sapiens OX=9606 GN=JUN PE=1 SV=2	Transcription factor AP-1	JUN	+	2.62584	0.00416129	3.76218	+	+	2.92505	0.00113043	4.44293	+		1.33654	0.0550069	2.62138		+	4.91899	0	4.67274	+	5	5	5	25.7	25.7	25.7	35.675	0	81.33	1664700000	32	P05412	P05412	21.1747	21.2655	22.8344	25.7008	25.5177	25.3427	26.2311	26.1326	26.2398	21.4414	21.9433	21.4724	25.2883	24.9904
sp|O75533|SF3B1_HUMAN Splicing factor 3B subunit 1 OS=Homo sapiens OX=9606 GN=SF3B1 PE=1 SV=3	Splicing factor 3B subunit 1	SF3B1	+	2.44939	0.00497101	3.75933	+	+	2.8606	0.00108484	4.58115	+		1.65564	0.0535153	0.931455		+	2.71159	0.00039886	1.25998	+	61	61	61	59.9	59.9	59.9	145.83	0	323.31	29106000000	653	O75533;B4DGZ4;A0A494C1M2;H7C341;O75533-2;F8WC19	O75533	24.2282	24.2781	25.9844	28.8851	28.6806	28.2031	29.4668	29.3298	29.4376	29.3447	29.1751	28.8602	29.7569	30.4708
tr|H3BNT4|H3BNT4_HUMAN M-phase phosphoprotein 6 OS=Homo sapiens OX=9606 GN=MPHOSPH6 PE=1 SV=1;sp|Q99547|MPH6_HUMAN M-phase phosphoprotein 6 OS=Homo sapiens OX=9606 GN=MPHOSPH6 PE=1 SV=2;tr|H3BSB3|H3BSB3_HUMAN M-phase phosphoprotein 6 OS=Homo sapiens OX=960	M-phase phosphoprotein 6	MPHOSPH6	+	4.26979	0	3.74902	+	+	5.00819	0	3.98512	+		1.00903	0.105239	2.60752		+	4.74938	0	3.92863	+	8	8	8	38.7	38.7	38.7	16.848	0	24.006	1916600000	47	H3BNT4;Q99547;H3BSB3;H3BNK8;H3BU96	H3BNT4;Q99547;H3BSB3	22.1553	21.7201	21.9447	25.6897	25.4058	25.9717	25.7936	25.9621	26.0198	22.8485	22.3517	22.5023	26.3367	26.4202
sp|Q15459|SF3A1_HUMAN Splicing factor 3A subunit 1 OS=Homo sapiens OX=9606 GN=SF3A1 PE=1 SV=1;sp|Q15459-2|SF3A1_HUMAN Isoform 2 of Splicing factor 3A subunit 1 OS=Homo sapiens OX=9606 GN=SF3A1	Splicing factor 3A subunit 1	SF3A1	+	2.79509	0.003713	3.71941	+	+	2.94408	0.00110014	3.74704	+		0.871052	0.150333	2.8327		+	2.3822	0.000334353	3.1428	+	12	12	12	21.6	21.6	21.6	88.885	0	70.677	1222500000	42	Q15459;Q15459-2;H7C1L2	Q15459;Q15459-2	21.1244	22.525	21.6627	26.0194	25.3154	25.1356	25.4579	25.2222	25.8731	21.2769	23.1097	22.3596	26.4346	26.5611
sp|P21127-8|CD11B_HUMAN Isoform 8 of Cyclin-dependent kinase 11B OS=Homo sapiens OX=9606 GN=CDK11B;sp|P21127-2|CD11B_HUMAN Isoform SV1 of Cyclin-dependent kinase 11B OS=Homo sapiens OX=9606 GN=CDK11B;sp|P21127-6|CD11B_HUMAN Isoform SV5 of Cyclin-dependent	Cyclin-dependent kinase 11B	CDK11B	+	2.98948	0.00313402	3.7094	+	+	3.72971	0.000917333	4.18375	+		0.74738	0.207549	3.10633		+	3.01655	0	5.08434	+	50	6	2	48.4	6	1.7	90.227	0	19.354	2955900000	53	P21127-8;P21127-2;P21127-6;P21127-9;A0A0D9SEN2;A0A0D9SER5;A0A0D9SEI3;P21127-3;P21127;P21127-10;P21127-5;P21127-4;Q9UQ88-9;Q9UQ88-8;A0A087WYI9;A0A087X1I0;Q13882;Q5QPQ9	P21127-8;P21127-2;P21127-6;P21127-9;A0A0D9SEN2;A0A0D9SER5;A0A0D9SEI3;P21127-3;P21127;P21127-10;P21127-5;P21127-4	21.4605	22.0525	22.2412	25.7873	24.9321	26.163	25.8074	26.5083	25.9896	21.6595	23.3203	21.6025	27.2342	27.0111
sp|Q99459|CDC5L_HUMAN Cell division cycle 5-like protein OS=Homo sapiens OX=9606 GN=CDC5L PE=1 SV=2	Cell division cycle 5-like protein	CDC5L	+	2.01165	0.0106228	3.68555	+	+	2.69874	0.00112452	5.22173	+		0.632274	0.265282	2.94558		+	0.980269	0.0121772	4.18639	+	24	24	24	42.8	42.8	42.8	92.25	0	276.71	5428500000	151	Q99459	Q99459	21.5607	24.0508	22.6044	26.9659	26.4836	25.8231	27.7756	28.0236	28.0818	27.5979	21.5984	21.5979	27.0683	27.2879
tr|C9J3C8|C9J3C8_HUMAN Transmembrane protein 248 (Fragment) OS=Homo sapiens OX=9606 GN=TMEM248 PE=1 SV=1;tr|C9JKP5|C9JKP5_HUMAN Transmembrane protein 248 (Fragment) OS=Homo sapiens OX=9606 GN=TMEM248 PE=1 SV=1;tr|U3KQ21|U3KQ21_HUMAN Transmembrane protein 2	Transmembrane protein 248	TMEM248		NaN	1	0			NaN	1	0			1.5003	0.0532482	-1.3729		+	1.49073	0.00511168	-1.11451		2	2	2	34.7	34.7	34.7	8.3097	0	12.76	105100000	10	C9J3C8;C9JKP5;U3KQ21;F8WE75;Q9NWD8-2;Q9NWD8	C9J3C8;C9JKP5;U3KQ21;F8WE75;Q9NWD8-2;Q9NWD8	21.86	22.7742	22.574	23.0858	21.737	21.7305	23.0251	22.2626	22.287	23.1331	23.8421	23.6973	22.3124	22.7415
tr|G5E9P4|G5E9P4_HUMAN PQ loop repeat containing 3, isoform CRA_b OS=Homo sapiens OX=9606 GN=SLC66A3 PE=1 SV=1;tr|C9J4B6|C9J4B6_HUMAN Solute carrier family 66 member 3 (Fragment) OS=Homo sapiens OX=9606 GN=SLC66A3 PE=1 SV=1;sp|Q8N755-2|S66A3_HUMAN Isoform	PQ-loop repeat-containing protein 3	PQLC3		NaN	1	0			NaN	1	0		+	2.70365	0.0144774	-1.15439		+	2.63874	0.000234542	-2.01362		2	2	2	11.8	11.8	11.8	18.608	0	6.8787	61221000	8	G5E9P4;C9J4B6;Q8N755-2;Q8N755;B5MC27	G5E9P4;C9J4B6;Q8N755-2;Q8N755;B5MC27	21.9507	20.6201	22.3105	21.9522	20.3418	23.0225	20.6983	21.4555	21.7089	23.7548	23.4721	23.8218	22.7249	22.548
tr|C9J4Z3|C9J4Z3_HUMAN 60S ribosomal protein L37a OS=Homo sapiens OX=9606 GN=RPL37A PE=1 SV=1;sp|P61513|RL37A_HUMAN 60S ribosomal protein L37a OS=Homo sapiens OX=9606 GN=RPL37A PE=1 SV=2;tr|M0R0A1|M0R0A1_HUMAN 60S ribosomal protein L37a OS=Homo sapiens OX=	60S ribosomal protein L37a	RPL37A		NaN	1	0			NaN	1	0			NaN	1	0		+	2.14535	0.000579658	2.82378	+	3	3	3	55.9	55.9	55.9	7.624	0	49.734	422880000	11	C9J4Z3;P61513;M0R0A1;Q6P4E4;E9PEL3;M0R2L6;G5E9R3;A6NKH3	C9J4Z3;P61513;M0R0A1;Q6P4E4;E9PEL3;M0R2L6	20.7592	23.1266	22.3527	21.5379	21.0744	21.7963	22.6156	21.7916	21.7721	23.1428	21.9576	21.3002	23.0655	22.2551
tr|C9J519|C9J519_HUMAN Dyslexia-associated protein KIAA0319-like protein OS=Homo sapiens OX=9606 GN=KIAA0319L PE=1 SV=1;tr|E7EN73|E7EN73_HUMAN Dyslexia-associated protein KIAA0319-like protein (Fragment) OS=Homo sapiens OX=9606 GN=KIAA0319L PE=1 SV=1;sp|Q8	Dyslexia-associated protein KIAA0319-like protein	KIAA0319L		NaN	1	0			NaN	1	0			0.0266565	0.971564	-0.0339203			0.226281	0.742222	0.195258		2	2	2	4.9	4.9	4.9	53.946	0.0020558	2.9859	66488000	3	C9J519;E7EN73;Q8IZA0-3;Q8IZA0-2;Q8IZA0	C9J519;E7EN73;Q8IZA0-3;Q8IZA0-2;Q8IZA0	23.4084	21.8071	21.8572	21.7774	22.4493	22.4949	21.8967	22.3664	20.868	23.3924	23.0035	23.0942	22.9569	22.521
tr|C9J586|C9J586_HUMAN Rho guanine nucleotide exchange factor 3 OS=Homo sapiens OX=9606 GN=ARHGEF3 PE=1 SV=1;tr|E7EU49|E7EU49_HUMAN Rho guanine nucleotide exchange factor 3 OS=Homo sapiens OX=9606 GN=ARHGEF3 PE=1 SV=1;tr|E9PG37|E9PG37_HUMAN Rho guanine nuc	Rho guanine nucleotide exchange factor 3	ARHGEF3		NaN	1	0			0.516874	0.283474	0.327403			NaN	1	0		+	2.31435	0.000570416	1.65513	+	4	3	3	12.5	10.6	10.6	47.616	0	15.757	212830000	7	C9J586;E7EU49;E9PG37;Q9NR81;Q9NR81-3;Q9NR81-2;C9J609;C9JNF2;H7C4P0;Q9NR81-4;C9J5K8	C9J586;E7EU49;E9PG37;Q9NR81;Q9NR81-3;Q9NR81-2;C9J609;C9JNF2;H7C4P0;Q9NR81-4	21.8493	22.7244	22.4165	23.5505	21.0696	22.456	22.5797	22.8702	22.5224	22.411	21.5398	21.6677	22.0118	22.257
sp|Q9BYG3|MK67I_HUMAN MKI67 FHA domain-interacting nucleolar phosphoprotein OS=Homo sapiens OX=9606 GN=NIFK PE=1 SV=1;tr|C9J808|C9J808_HUMAN MKI67 FHA domain-interacting nucleolar phosphoprotein (Fragment) OS=Homo sapiens OX=9606 GN=NIFK PE=1 SV=8;tr|C9J6C	MKI67 FHA domain-interacting nucleolar phosphoprotein	NIFK	+	2.41544	0.00517314	3.66502	+	+	2.11052	0.00204627	2.9988	+	+	1.7509	0.0269412	2.89878	+	+	2.90101	0	3.74283	+	11	11	11	45.1	45.1	45.1	34.222	0	127.91	1912400000	63	Q9BYG3;C9J808;C9J6C5;H7BZL0	Q9BYG3;C9J808;C9J6C5	23.1751	21.1729	22.1802	25.8663	26.1606	25.4964	24.8198	25.4128	25.292	22.4196	23.7791	22.3736	26.4392	26.2404
sp|Q9UIG0-2|BAZ1B_HUMAN Isoform 2 of Tyrosine-protein kinase BAZ1B OS=Homo sapiens OX=9606 GN=BAZ1B;sp|Q9UIG0|BAZ1B_HUMAN Tyrosine-protein kinase BAZ1B OS=Homo sapiens OX=9606 GN=BAZ1B PE=1 SV=2	Tyrosine-protein kinase BAZ1B	BAZ1B	+	2.10553	0.0101073	3.65866	+	+	2.71038	0.00113325	5.23932	+	+	1.76742	0.0264604	2.89278	+	+	5.61236	0	3.80388	+	25	25	25	23.8	23.8	23.8	170.45	0	232.95	4382400000	134	Q9UIG0-2;Q9UIG0	Q9UIG0-2;Q9UIG0	22.0293	22.3033	24.2573	26.879	26.6207	26.0662	27.7996	28.0719	28.4364	23.7206	23.6165	23.417	27.0492	27.3558
tr|M0QY24|M0QY24_HUMAN Zinc finger protein 546 OS=Homo sapiens OX=9606 GN=ZNF546 PE=1 SV=1;sp|Q86UE3|ZN546_HUMAN Zinc finger protein 546 OS=Homo sapiens OX=9606 GN=ZNF546 PE=1 SV=2	Zinc finger protein 546	ZNF546	+	1.16781	0.045996	3.64698	+	+	3.70011	0.000958217	4.78927	+		0.044116	0.948611	0.143707		+	2.90939	0	2.95128	+	40	40	36	49.8	49.8	45.2	95.511	0	323.31	13728000000	215	M0QY24;Q86UE3;M0QXR6;M0R292;M0QXH5	M0QY24;Q86UE3	21.2566	22.424	21.5455	23.7136	24.2283	28.2252	26.3297	26.5664	26.6979	26.5997	26.3262	26.8801	28.1099	27.5592
tr|C9JK83|C9JK83_HUMAN STAM-binding protein (Fragment) OS=Homo sapiens OX=9606 GN=STAMBP PE=1 SV=1;sp|O95630-2|STABP_HUMAN Isoform 2 of STAM-binding protein OS=Homo sapiens OX=9606 GN=STAMBP;sp|O95630|STABP_HUMAN STAM-binding protein OS=Homo sapiens OX=960	STAM-binding protein	STAMBP		NaN	1	0			0.515768	0.191466	0.650486			0.527831	0.484865	0.364611		+	1.85456	0.00162236	1.76322	+	2	2	2	8.8	8.8	8.8	36.156	0.00091603	3.4806	324800000	8	C9JK83;O95630-2;O95630;C9JZ93;C9JEK5;F5H5B9	C9JK83;O95630-2;O95630;C9JZ93;C9JEK5;F5H5B9	22.2196	22.5367	20.7531	21.8345	20.926	22.6263	22.4953	22.5969	22.3686	21.9565	22.6484	22.7441	23.1645	22.6632
tr|C9JN33|C9JN33_HUMAN Cyclic AMP-responsive element-binding protein 5 (Fragment) OS=Homo sapiens OX=9606 GN=CREB5 PE=1 SV=8		CREB5	+	2.88629	0.00374661	-3.09312		+	1.00557	0.0198096	-2.03689		+	1.80401	0.0275491	-2.24472			0.536021	0.112452	-1.41075		11	1	1	47.4	11.8	11.8	23.796	0	6.2438	355180000	12	C9JN33	C9JN33	24.886	24.9772	25.226	22.548	21.9953	21.2665	21.6277	22.5436	24.8072	24.2827	23.0442	24.435	21.5553	22.3166
tr|M0R202|M0R202_HUMAN Zinc finger protein 446 OS=Homo sapiens OX=9606 GN=ZNF446 PE=1 SV=1;sp|Q9NWS9-2|ZN446_HUMAN Isoform 2 of Zinc finger protein 446 OS=Homo sapiens OX=9606 GN=ZNF446;sp|Q9NWS9|ZN446_HUMAN Zinc finger protein 446 OS=Homo sapiens OX=9606	Zinc finger protein 446	ZNF446	+	1.19546	0.0430838	3.6416	+	+	1.46934	0.0051935	4.43593	+		0.677196	0.237154	4.03966		+	3.29883	0	5.1051	+	16	16	16	57.9	57.9	57.9	44.094	0	323.31	5898400000	93	M0R202;Q9NWS9-2;Q9NWS9;A0A0B4J2G2;M0R034;A0A0A0MR84	M0R202;Q9NWS9-2;Q9NWS9;A0A0B4J2G2	23.3457	21.3365	26.0767	28.0023	26.6404	27.041	27.646	27.8691	28.5518	22.0243	21.7029	23.2048	29.385	28.6404
tr|C9JRY4|C9JRY4_HUMAN Vesicle-trafficking protein SEC22a (Fragment) OS=Homo sapiens OX=9606 GN=SEC22A PE=1 SV=1;tr|C9JNZ0|C9JNZ0_HUMAN Vesicle-trafficking protein SEC22a (Fragment) OS=Homo sapiens OX=9606 GN=SEC22A PE=1 SV=9;sp|Q96IW7|SC22A_HUMAN Vesicle-	Vesicle-trafficking protein SEC22a	SEC22A		NaN	1	0			0.382094	0.305779	1.12161			0.0228554	0.971793	0.0395908		+	0.929909	0.0327351	-0.769283		4	4	4	22.9	22.9	22.9	24.506	0	21.391	666250000	23	C9JRY4;C9JNZ0;Q96IW7;C9JDJ8;C9JZ27;F8WAU7;C9JR77;C9J463	C9JRY4;C9JNZ0;Q96IW7;C9JDJ8;C9JZ27	21.4218	21.3421	23.6044	21.2676	21.6555	22.5696	24.1969	21.2711	24.2652	24.5866	25.3093	25.072	24.3264	24.6741
tr|C9JW96|C9JW96_HUMAN Prohibitin (Fragment) OS=Homo sapiens OX=9606 GN=PHB PE=1 SV=2;sp|P35232|PHB_HUMAN Prohibitin OS=Homo sapiens OX=9606 GN=PHB PE=1 SV=1;tr|C9JZ20|C9JZ20_HUMAN Prohibitin (Fragment) OS=Homo sapiens OX=9606 GN=PHB PE=1 SV=1;tr|E7ESE2|E7	Prohibitin	PHB	+	1.76947	0.0205699	-2.52731			0.0307679	0.961404	-0.0556329			0.55332	0.34741	-1.35878		+	1.0881	0.0130298	-1.2504		6	6	6	29.3	29.3	29.3	26.891	0	10.178	322240000	17	C9JW96;P35232;C9JZ20;E7ESE2;E9PCW0;P35232-2;D6RBK0	C9JW96;P35232;C9JZ20;E7ESE2;E9PCW0	25.0198	23.0653	24.6888	21.9212	21.2964	21.9743	24.0813	24.3494	24.1763	24.1534	24.2518	24.3549	24.0705	20.7249
sp|P04637|P53_HUMAN Cellular tumor antigen p53 OS=Homo sapiens OX=9606 GN=TP53 PE=1 SV=4;sp|P04637-4|P53_HUMAN Isoform 4 of Cellular tumor antigen p53 OS=Homo sapiens OX=9606 GN=TP53;tr|A0A087WZU8|A0A087WZU8_HUMAN Cellular tumor antigen p53 OS=Homo sapiens	Cellular tumor antigen p53	TP53	+	2.05067	0.0104924	3.61774	+	+	4.01538	0	9.47699	+		0.00453468	0.994604	0.0132516		+	3.45422	0	9.31663	+	26	26	26	67.2	67.2	67.2	43.653	0	323.31	57025000000	347	P04637;P04637-4;A0A087WZU8;A0A0U1RQC9;P04637-7;A0A087X1Q1;P04637-3;P04637-2;J3KP33;P04637-6;P04637-5;E7ESS1;P04637-8;P04637-9;A0A087WT22;A0A087WXZ1;E7EQX7;E9PFT5;E7EMR6;S4R334;E9PCY9	P04637;P04637-4;A0A087WZU8;A0A0U1RQC9;P04637-7;A0A087X1Q1;P04637-3;P04637-2;J3KP33;P04637-6;P04637-5;E7ESS1;P04637-8;P04637-9	21.0658	23.1561	22.0439	25.6679	26.5239	24.9273	31.6066	31.5602	31.53	21.7223	23.842	21.1226	23.1778	21.9946
tr|D3DQV9|D3DQV9_HUMAN Eukaryotic translation initiation factor 4 gamma 2 (Fragment) OS=Homo sapiens OX=9606 GN=EIF4G2 PE=1 SV=1;sp|P78344|IF4G2_HUMAN Eukaryotic translation initiation factor 4 gamma 2 OS=Homo sapiens OX=9606 GN=EIF4G2 PE=1 SV=1;tr|H0Y3P2|	Eukaryotic translation initiation factor 4 gamma 2	EIF4G2		NaN	1	0			0.209578	0.69631	0.56458			0.457057	0.443033	-1.16169			0.764695	0.119415	0.326194		8	8	8	11.5	11.5	11.5	102.33	0	26.96	889420000	32	D3DQV9;P78344;H0Y3P2;P78344-2;E9PKF8;H0YCH5;H0YE22;H0YD77	D3DQV9;P78344;H0Y3P2;P78344-2	21.9859	22.1735	22.3238	21.6616	22.4038	21.9092	23.0234	20.7959	24.3576	25.2977	24.7456	24.8966	24.7935	25.0074
tr|D3YTB1|D3YTB1_HUMAN 60S ribosomal protein L32 (Fragment) OS=Homo sapiens OX=9606 GN=RPL32 PE=1 SV=1;tr|F8W727|F8W727_HUMAN 60S ribosomal protein L32 OS=Homo sapiens OX=9606 GN=RPL32 PE=1 SV=1;sp|P62910|RL32_HUMAN 60S ribosomal protein L32 OS=Homo sapien	60S ribosomal protein L32	RPL32		NaN	1	0			NaN	1	0			0.299594	0.667159	-0.372158			0.304785	0.560683	-0.324586		3	3	3	28.6	28.6	28.6	15.616	0	4.943	168560000	3	D3YTB1;F8W727;P62910	D3YTB1;F8W727;P62910	21.3387	22.2182	21.8359	21.5734	21.627	21.9071	21.7954	21.383	22.8873	22.7616	23.2302	23.7394	22.6818	22.2612
tr|D6R938|D6R938_HUMAN Calcium/calmodulin-dependent protein kinase OS=Homo sapiens OX=9606 GN=CAMK2D PE=1 SV=1;tr|E9PBG7|E9PBG7_HUMAN Calcium/calmodulin-dependent protein kinase OS=Homo sapiens OX=9606 GN=CAMK2D PE=1 SV=1;tr|E9PF82|E9PF82_HUMAN Calcium/cal	Calcium/calmodulin-dependent protein kinase type II subunit delta	CAMK2D		NaN	1	0			0.294998	0.559001	0.415326			0.487752	0.471607	-0.516629		+	1.142	0.00995333	-1.57275		6	4	3	17.9	11.6	9.4	56.298	0	29.675	449560000	29	D6R938;E9PBG7;E9PF82;Q13557-8;Q13557-12;Q13557-10;Q13557;Q13557-6;Q13557-11;Q13557-9;Q13557-5;Q13557-3;Q13557-4;H0Y9J2;H0Y9C2	D6R938;E9PBG7;E9PF82;Q13557-8;Q13557-12;Q13557-10;Q13557;Q13557-6;Q13557-11;Q13557-9;Q13557-5;Q13557-3;Q13557-4;H0Y9J2;H0Y9C2	22.387	22.1421	20.897	22.5405	22.2157	22.9356	21.711	22.8559	22.1053	24.9096	25.149	25.2774	23.8999	24.4529
sp|Q06265|EXOS9_HUMAN Exosome complex component RRP45 OS=Homo sapiens OX=9606 GN=EXOSC9 PE=1 SV=3;sp|Q06265-2|EXOS9_HUMAN Isoform 2 of Exosome complex component RRP45 OS=Homo sapiens OX=9606 GN=EXOSC9;tr|D6R905|D6R905_HUMAN Exosome complex component RRP45	Exosome complex component RRP45	EXOSC9	+	3.89829	0.000950495	3.60199	+	+	4.37632	0	5.47603	+	+	1.75122	0.0243115	4.98958	+	+	3.82144	0	6.42133	+	10	10	10	23.2	23.2	23.2	48.948	0	38.919	6573200000	66	Q06265;Q06265-2;D6R905;D6RIY6;D6RA17;D6RAP4;Q06265-3;Q06265-4;H0Y9L5	Q06265;Q06265-2;D6R905;D6RIY6;D6RA17;D6RAP4;Q06265-3;Q06265-4	22.6356	22.0576	21.8455	25.8355	25.645	25.8643	27.9652	27.4666	27.5351	21.5912	22.7194	21.3231	27.9887	28.1645
sp|Q15424|SAFB1_HUMAN Scaffold attachment factor B1 OS=Homo sapiens OX=9606 GN=SAFB PE=1 SV=4;sp|Q15424-4|SAFB1_HUMAN Isoform 4 of Scaffold attachment factor B1 OS=Homo sapiens OX=9606 GN=SAFB;sp|Q15424-3|SAFB1_HUMAN Isoform 3 of Scaffold attachment factor	Scaffold attachment factor B1	SAFB	+	4.65075	0	3.60063	+	+	3.17264	0.00112596	1.85785	+	+	3.12293	0.0181333	4.77713	+	+	4.22482	0	3.21404	+	57	37	37	52.8	34.2	34.2	102.64	0	323.31	41057000000	582	Q15424;Q15424-4;Q15424-3;Q15424-2;K7EII0;K7ES42	Q15424;Q15424-4;Q15424-3;Q15424-2	29.2753	29.5199	29.1441	32.944	32.7025	33.0948	31.1838	30.8869	31.4421	26.3699	26.7294	26.1146	31.4922	31.8198
sp|Q9NS73|MBIP1_HUMAN MAP3K12-binding inhibitory protein 1 OS=Homo sapiens OX=9606 GN=MBIP PE=1 SV=2;sp|Q9NS73-5|MBIP1_HUMAN Isoform 4 of MAP3K12-binding inhibitory protein 1 OS=Homo sapiens OX=9606 GN=MBIP;tr|A0A087X1L0|A0A087X1L0_HUMAN MAP3K12-binding in	MAP3K12-binding inhibitory protein 1	MBIP	+	3.63833	0.00075	3.59395	+	+	4.0365	0.000874074	4.57676	+		0.576685	0.330811	1.26242		+	2.79818	0	3.95631	+	10	10	10	41.9	41.9	41.9	39.281	0	111.25	1460600000	31	Q9NS73;Q9NS73-5;A0A087X1L0;S4R2X9;Q9NS73-2;S4R3N2;Q9NS73-3;S4R3P6;S4R3Y0	Q9NS73;Q9NS73-5;A0A087X1L0;S4R2X9;Q9NS73-2;S4R3N2;Q9NS73-3;S4R3P6	22.0955	22.1252	21.3246	25.4365	25.6425	25.2481	26.1905	26.4991	26.5859	22.7152	21.5558	21.1213	24.626	21.6998
sp|O95551|TYDP2_HUMAN Tyrosyl-DNA phosphodiesterase 2 OS=Homo sapiens OX=9606 GN=TDP2 PE=1 SV=1;sp|O95551-2|TYDP2_HUMAN Isoform 2 of Tyrosyl-DNA phosphodiesterase 2 OS=Homo sapiens OX=9606 GN=TDP2;sp|O95551-3|TYDP2_HUMAN Isoform 3 of Tyrosyl-DNA phosphodie	Tyrosyl-DNA phosphodiesterase 2	TDP2	+	4.21189	0	3.58315	+	+	4.37	0	5.28355	+		0.46131	0.442866	1.08419		+	6.05902	0	5.45114	+	13	13	13	45.3	45.3	45.3	40.929	0	145.05	4677000000	62	O95551;O95551-2;O95551-3;X6R5A3	O95551;O95551-2;O95551-3;X6R5A3	21.6451	22.0665	21.7753	25.5492	25.5963	25.0908	27.1945	26.6547	27.4883	22.7524	22.7788	22.4965	24.7565	24.786
tr|D6RGY8|D6RGY8_HUMAN Protein YIPF3 (Fragment) OS=Homo sapiens OX=9606 GN=YIPF3 PE=1 SV=1;tr|D6RFI3|D6RFI3_HUMAN Protein YIPF3 (Fragment) OS=Homo sapiens OX=9606 GN=YIPF3 PE=1 SV=1;tr|E7EQR8|E7EQR8_HUMAN Protein YIPF3 OS=Homo sapiens OX=9606 GN=YIPF3 PE=1	Protein YIPF3;Protein YIPF3, 36 kDa form III	YIPF3		NaN	1	0			0.218789	0.716171	0.291295			0.137256	0.842109	0.254983		+	1.98094	0.00428739	-0.61603		3	3	3	34.9	34.9	34.9	12.29	0	26.036	526750000	30	D6RGY8;D6RFI3;E7EQR8;Q9GZM5;H0Y9A1	D6RGY8;D6RFI3;E7EQR8;Q9GZM5	21.8078	22.116	22.7093	22.5928	20.816	22.4002	23.2684	21.7237	22.5148	24.9427	25.1028	24.7967	24.0692	25.1163
sp|Q9NQB0-7|TF7L2_HUMAN Isoform 7 of Transcription factor 7-like 2 OS=Homo sapiens OX=9606 GN=TCF7L2;tr|E2GH26|E2GH26_HUMAN T-cell factor-4 variant L OS=Homo sapiens OX=9606 GN=TCF7L2 PE=1 SV=1;sp|Q9NQB0-13|TF7L2_HUMAN Isoform 13 of Transcription factor 7-	Transcription factor 7-like 2	TCF7L2		0.537862	0.537222	-0.179427			0.232278	0.782861	-0.115896			0.201433	0.742825	0.785685			1.36337	0.206741	-0.136742		20	20	3	48.5	48.5	2.5	66.093	0	235.01	5701100000	134	Q9NQB0-7;E2GH26;Q9NQB0-13;A0A0D9SGH8;Q9NQB0-3;Q9NQB0-12;Q5VVR7;Q5VVR5;Q9UJU2;Q9UJU2-6;P36402;B7WNT5;H0YBC8;H0YAR8;P36402-11;P36402-7;P36402-3;P36402-10;P36402-14;P36402-5;P36402-15;P36402-4;P36402-12;Q9UJU2-5;P36402-13;P36402-9;Q9UJU2-7;Q9UJU2-3;P36402-2;P36402-6;P36402-8;P36402-16;H0YBP2;Q5JRY4;Q5VVR8;E5RHL1;A0A1B0GVE1	Q9NQB0-7;E2GH26;Q9NQB0-13;A0A0D9SGH8;Q9NQB0-3;Q9NQB0-12;Q5VVR7	25.7651	26.2345	26.1346	25.7958	25.9148	25.8854	26.1797	25.8851	25.7218	27.4119	27.3427	27.4269	26.5955	26.7585
tr|A0A494C050|A0A494C050_HUMAN NF-kappa-B-activating protein (Fragment) OS=Homo sapiens OX=9606 GN=NKAP PE=1 SV=1;sp|Q8N5F7|NKAP_HUMAN NF-kappa-B-activating protein OS=Homo sapiens OX=9606 GN=NKAP PE=1 SV=1	NF-kappa-B-activating protein	NKAP	+	2.80873	0.00372973	3.58083	+	+	1.17694	0.0174243	1.06148	+		1.00211	0.115411	1.99893		+	3.68499	0	2.53517	+	6	6	6	27.8	27.8	27.8	46.877	0	53.944	2427600000	45	A0A494C050;Q8N5F7;Q5M9Q1	A0A494C050;Q8N5F7	22.6136	23.4059	24.0195	27.1934	26.4717	27.1164	24.5445	24.5088	24.1703	23.994	24.0293	23.7142	26.8064	26.8769
sp|Q9Y6X2|PIAS3_HUMAN E3 SUMO-protein ligase PIAS3 OS=Homo sapiens OX=9606 GN=PIAS3 PE=1 SV=2;tr|E9PHH8|E9PHH8_HUMAN E3 SUMO-protein ligase PIAS3 OS=Homo sapiens OX=9606 GN=PIAS3 PE=1 SV=1	E3 SUMO-protein ligase PIAS3	PIAS3	+	2.92497	0.00336842	3.57623	+	+	5.09111	0	9.55731	+		0.810594	0.172416	3.33739		+	3.41119	0	9.63916	+	33	31	31	62.4	58.9	58.9	68.017	0	323.31	75908000000	340	Q9Y6X2;E9PHH8;E7ESB4;U3KQV1	Q9Y6X2;E9PHH8	22.3438	21.4077	21.4966	25.681	25.6004	24.6954	31.0439	31.4063	31.4698	20.8419	23.1726	23.6738	28.0817	27.053
sp|Q9Y3B9|RRP15_HUMAN RRP15-like protein OS=Homo sapiens OX=9606 GN=RRP15 PE=1 SV=2	RRP15-like protein	RRP15	+	2.43457	0.00519149	3.56652	+	+	1.55657	0.00580187	1.96134	+		1.12667	0.0759619	4.02256		+	3.20788	0	4.97765	+	4	4	4	15.2	15.2	15.2	31.484	0	25.151	1528100000	48	Q9Y3B9	Q9Y3B9	23.0946	22.3864	21.1311	25.9395	25.8227	25.5494	24.028	24.3151	24.1531	20.5127	20.9439	22.178	26.8176	26.8569
sp|Q8IWV8-4|UBR2_HUMAN Isoform 4 of E3 ubiquitin-protein ligase UBR2 OS=Homo sapiens OX=9606 GN=UBR2;sp|Q8IWV8|UBR2_HUMAN E3 ubiquitin-protein ligase UBR2 OS=Homo sapiens OX=9606 GN=UBR2 PE=1 SV=1;sp|Q8IWV8-2|UBR2_HUMAN Isoform 2 of E3 ubiquitin-protein li	E3 ubiquitin-protein ligase UBR2	UBR2		NaN	1	0		+	3.85772	0.000819444	5.7931	+		0.419778	0.456028	-2.48131			0.135997	0.816579	0.69641		6	6	6	5	5	5	200.54	0	6.782	4844000000	13	Q8IWV8-4;Q8IWV8;Q8IWV8-2;Q8IWV8-3	Q8IWV8-4;Q8IWV8;Q8IWV8-2	21.3957	22.4647	22.57	19.9536	21.6018	22.1509	28.2108	27.9156	27.6832	22.5755	28.5007	27.9445	27.1136	21.611
tr|Q5QPL9|Q5QPL9_HUMAN RNA-binding protein Raly (Fragment) OS=Homo sapiens OX=9606 GN=RALY PE=1 SV=1;sp|Q9UKM9-2|RALY_HUMAN Isoform 1 of RNA-binding protein Raly OS=Homo sapiens OX=9606 GN=RALY;sp|Q9UKM9|RALY_HUMAN RNA-binding protein Raly OS=Homo sapiens	RNA-binding protein Raly	RALY	+	3.22852	0.00299401	3.5581	+	+	4.37426	0.000758842	2.63205	+	+	2.67842	0.0140253	3.01623	+	+	2.97471	0	3.42971	+	5	5	5	21.1	21.1	21.1	24.665	0	28.518	681610000	37	Q5QPL9;Q9UKM9-2;Q9UKM9;Q5QPM0;Q5QPM2;Q5QPM1	Q5QPL9;Q9UKM9-2;Q9UKM9;Q5QPM0;Q5QPM2;Q5QPM1	22.4392	22.8051	22.4179	25.9568	25.6203	26.7593	25.2602	25.2134	25.0847	21.0385	22.2199	22.1216	24.6897	25.1911
sp|P48552|NRIP1_HUMAN Nuclear receptor-interacting protein 1 OS=Homo sapiens OX=9606 GN=NRIP1 PE=1 SV=2	Nuclear receptor-interacting protein 1	NRIP1	+	2.99802	0.00307071	3.53573	+	+	5.34269	0	8.60057	+		0.380406	0.567321	0.545233		+	3.98836	0	4.18287	+	47	47	47	54.6	54.6	54.6	126.94	0	323.31	7901400000	224	P48552;C9J130	P48552	22.0945	21.6545	21.4159	25.3606	25.8226	24.5888	30.0523	30.6004	30.3139	22.648	21.7903	22.0985	21.777	23.6735
sp|Q96C00|ZBTB9_HUMAN Zinc finger and BTB domain-containing protein 9 OS=Homo sapiens OX=9606 GN=ZBTB9 PE=1 SV=1	Zinc finger and BTB domain-containing protein 9	ZBTB9	+	2.69754	0.0039	3.5291	+	+	3.86295	0.000498054	7.27691	+		0.838781	0.170314	2.27989		+	4.24561	0	6.92264	+	15	15	15	48	48	48	50.602	0	295.36	8815800000	107	Q96C00;A0A087X1K1;A0A087X1Z5	Q96C00	22.7328	21.3785	21.2238	25.0834	25.3948	25.4442	28.8994	28.8796	29.3868	22.5769	21.595	21.4038	25.8193	24.8004
sp|Q96G23|CERS2_HUMAN Ceramide synthase 2 OS=Homo sapiens OX=9606 GN=CERS2 PE=1 SV=1;tr|Q5SZE1|Q5SZE1_HUMAN Ceramide synthase 2 (Fragment) OS=Homo sapiens OX=9606 GN=CERS2 PE=1 SV=2;tr|Q5SZE2|Q5SZE2_HUMAN Ceramide synthase 2 (Fragment) OS=Homo sapiens OX=9	Ceramide synthase 2	CERS2		NaN	1	0		+	5.28195	0	5.76058	+		0.900195	0.287801	-0.370562			0.369599	0.731939	-0.0949917		11	11	11	32.9	32.9	32.9	44.876	0	102.53	6322800000	122	Q96G23;Q5SZE1;Q5SZE2;Q5SZE3;H0YKH6;Q5SZE4;H0YNU7;H0YLQ6	Q96G23;Q5SZE1;Q5SZE2;Q5SZE3;H0YKH6;Q5SZE4;H0YNU7	21.1048	21.6741	21.1998	22.9508	22.2647	21.2944	27.086	27.0732	27.1013	28.0834	28.0569	28.2379	28.0286	27.8315
sp|Q9BZ95-4|NSD3_HUMAN Isoform 4 of Histone-lysine N-methyltransferase NSD3 OS=Homo sapiens OX=9606 GN=NSD3;sp|Q9BZ95-2|NSD3_HUMAN Isoform 2 of Histone-lysine N-methyltransferase NSD3 OS=Homo sapiens OX=9606 GN=NSD3;sp|Q9BZ95-5|NSD3_HUMAN Isoform 5 of Hist	Histone-lysine N-methyltransferase NSD3	WHSC1L1	+	3.31865	0.00191411	3.49592	+	+	4.25379	0.000659794	5.12439	+		0.784196	0.213528	1.46532		+	2.90496	0	3.9278	+	22	22	22	24	24	24	154.52	0	155.14	2054400000	63	Q9BZ95-4;Q9BZ95-2;Q9BZ95-5;Q9BZ95;Q9BZ95-3;E9PKA2;H0YE68	Q9BZ95-4;Q9BZ95-2;Q9BZ95-5;Q9BZ95;Q9BZ95-3	22.3045	22.7972	23.1042	25.9959	26.7146	25.9831	27.6411	27.7591	28.1788	22.6009	21.0285	21.3969	22.3095	24.5735
sp|P51991|ROA3_HUMAN Heterogeneous nuclear ribonucleoprotein A3 OS=Homo sapiens OX=9606 GN=HNRNPA3 PE=1 SV=2;sp|P51991-2|ROA3_HUMAN Isoform 2 of Heterogeneous nuclear ribonucleoprotein A3 OS=Homo sapiens OX=9606 GN=HNRNPA3	Heterogeneous nuclear ribonucleoprotein A3	HNRNPA3	+	2.6722	0.00422951	3.48298	+	+	3.10769	0.00115385	3.04623	+	+	1.9781	0.0184432	4.55268	+	+	2.93132	0	4.54211	+	11	11	11	35.7	35.7	35.7	39.594	0	119.65	2831400000	61	P51991;P51991-2;H7C1J8	P51991;P51991-2	22.5744	22.8504	23.6322	27.028	26.7104	25.7675	26.0574	25.8992	26.2391	22.2853	21.5293	22.6008	27.8822	27.3813
sp|P50990|TCPQ_HUMAN T-complex protein 1 subunit theta OS=Homo sapiens OX=9606 GN=CCT8 PE=1 SV=4;sp|P50990-2|TCPQ_HUMAN Isoform 2 of T-complex protein 1 subunit theta OS=Homo sapiens OX=9606 GN=CCT8;sp|P50990-3|TCPQ_HUMAN Isoform 3 of T-complex protein 1 s	T-complex protein 1 subunit theta	CCT8	+	2.11087	0.0104654	3.45786	+	+	3.01532	0.00121875	4.58878	+		0.623063	0.283387	1.68221		+	2.76887	0	2.71746	+	25	25	25	60.4	60.4	60.4	59.62	0	137.32	5650300000	112	P50990;P50990-2;P50990-3;H7C4C8;H7C2U0	P50990;P50990-2;P50990-3	22.6614	22.7637	21.2131	26.5145	24.8289	25.6684	26.4661	26.979	26.9595	24.9846	25.1441	26.119	28.3805	28.1342
sp|Q7Z353|HDX_HUMAN Highly divergent homeobox OS=Homo sapiens OX=9606 GN=HDX PE=1 SV=1;sp|Q7Z353-2|HDX_HUMAN Isoform 2 of Highly divergent homeobox OS=Homo sapiens OX=9606 GN=HDX	Highly divergent homeobox	HDX	+	3.35125	0.00193789	3.4329	+	+	4.71065	0	7.11046	+		0.670818	0.278388	1.06796		+	3.73686	0	5.36944	+	21	21	21	47.7	47.7	47.7	77.205	0	323.31	5518700000	125	Q7Z353;Q7Z353-2;E2QRN0;REV__Q96SF7-2;REV__Q96SF7	Q7Z353;Q7Z353-2	22.1439	21.6213	22.33	25.8624	25.5107	25.0209	29.1069	29.5326	28.7871	22.3613	22.0374	21.1335	22.0671	24.1253
tr|E9PEY4|E9PEY4_HUMAN Dystrobrevin OS=Homo sapiens OX=9606 GN=DTNB PE=1 SV=1;tr|E7EVB6|E7EVB6_HUMAN Dystrobrevin OS=Homo sapiens OX=9606 GN=DTNB PE=1 SV=3;sp|O60941-6|DTNB_HUMAN Isoform 6 of Dystrobrevin beta OS=Homo sapiens OX=9606 GN=DTNB;sp|O60941-7|DT	Dystrobrevin;Dystrobrevin beta	DTNB		NaN	1	0			NaN	1	0			0.536232	0.369932	-1.08409		+	3.56832	0	-2.71482		5	5	3	14.2	14.2	9	67.054	0	10.355	322650000	11	E9PEY4;E7EVB6;O60941-6;O60941-7;O60941;O60941-3;O60941-5;O60941-2;O60941-4;Q9Y4J8-2;Q9Y4J8;K7ERH7;M0R0C4;Q9Y4J8-12;Q9Y4J8-5;Q9Y4J8-3	E9PEY4;E7EVB6;O60941-6;O60941-7;O60941;O60941-3;O60941-5;O60941-2;O60941-4	22.3068	21.8245	21.1945	22.382	22.3135	21.7714	21.1518	22.4269	21.7397	25.0611	24.7746	24.7799	24.8141	24.527
sp|Q9Y3Z3|SAMH1_HUMAN Deoxynucleoside triphosphate triphosphohydrolase SAMHD1 OS=Homo sapiens OX=9606 GN=SAMHD1 PE=1 SV=2;tr|A0A2R8YCS7|A0A2R8YCS7_HUMAN Deoxynucleoside triphosphate triphosphohydrolase SAMHD1 OS=Homo sapiens OX=9606 GN=SAMHD1 PE=1 SV=1;sp|	Deoxynucleoside triphosphate triphosphohydrolase SAMHD1	SAMHD1	+	3.09037	0.00268817	3.41875	+	+	3.95069	0.00075641	4.23049	+		0.153992	0.818033	0.351972		+	2.29331	0.000409357	3.01732	+	13	13	13	30	30	30	72.2	0	55.755	1625400000	54	Q9Y3Z3;A0A2R8YCS7;Q9Y3Z3-4;Q9Y3Z3-3;A0A2R8YD90;A0A2R8Y6J9;A0A2R8YF51;A0A2R8Y5D2;A0A2R8YFV6;A0A2R8Y586;A0A2R8YDI8;A0A2R8YF18	Q9Y3Z3;A0A2R8YCS7;Q9Y3Z3-4;Q9Y3Z3-3;A0A2R8YD90	22.1123	21.6364	22.3123	24.9664	25.3063	26.0445	26.2534	25.9106	26.5884	23.9442	22.6228	22.2139	24.1814	23.7001
sp|P20700|LMNB1_HUMAN Lamin-B1 OS=Homo sapiens OX=9606 GN=LMNB1 PE=1 SV=2;tr|E9PBF6|E9PBF6_HUMAN Lamin-B1 OS=Homo sapiens OX=9606 GN=LMNB1 PE=1 SV=1;tr|A0A0D9SFE5|A0A0D9SFE5_HUMAN Lamin B1, isoform CRA_a OS=Homo sapiens OX=9606 GN=LMNB1 PE=1 SV=1	Lamin-B1	LMNB1	+	3.58875	0.000680851	3.3417	+	+	2.5373	0.00156618	1.58462	+	+	3.05467	0.0155349	3.11201	+	+	3.10534	0	1.94274	+	35	34	33	63.7	63.7	61.9	66.408	0	323.31	9435400000	322	P20700;E9PBF6;A0A0D9SFE5;A0A0D9SFY5	P20700;E9PBF6;A0A0D9SFE5	27.5187	28.0276	27.2372	31.1752	30.9622	30.6713	29.0983	29.1042	29.3348	25.5631	25.5279	25.9794	29.1563	29.0832
sp|Q15776|ZKSC8_HUMAN Zinc finger protein with KRAB and SCAN domains 8 OS=Homo sapiens OX=9606 GN=ZKSCAN8 PE=1 SV=2	Zinc finger protein with KRAB and SCAN domains 8	ZKSCAN8	+	3.5484	0.00142657	3.34001	+	+	3.78087	0.000902887	3.71995	+		1.15491	0.0738246	3.42989		+	3.80011	0	5.35464	+	31	28	26	60.4	57.8	54.7	65.815	0	323.31	25425000000	422	Q15776;Q15776-2;P19878-2;P19878-4;P19878-3;P19878	Q15776	26.5363	26.0827	25.6725	29.5808	29.1836	29.5471	29.7521	29.6703	30.0289	24.8377	24.3009	25.5946	29.8801	29.4825
sp|Q8WWQ0|PHIP_HUMAN PH-interacting protein OS=Homo sapiens OX=9606 GN=PHIP PE=1 SV=2	PH-interacting protein	PHIP	+	2.26562	0.00802667	3.33649	+	+	2.67347	0.00119852	4.38831	+	+	2.35614	0.0133211	3.96244	+	+	4.06358	0	4.05307	+	23	23	22	21.3	21.3	20.5	206.69	0	80.961	2291600000	98	Q8WWQ0	Q8WWQ0	22.759	24.0795	22.0654	26.4682	26.4418	26.0034	27.2792	27.0676	27.7221	21.697	22.4646	21.7271	26.6259	26.4941
sp|Q6NTE8|MRNIP_HUMAN MRN complex-interacting protein OS=Homo sapiens OX=9606 GN=MRNIP PE=1 SV=2;tr|E5RI52|E5RI52_HUMAN MRN complex-interacting protein OS=Homo sapiens OX=9606 GN=MRNIP PE=1 SV=1;tr|E5RJC6|E5RJC6_HUMAN MRN complex-interacting protein OS=Hom	UPF0544 protein C5orf45	C5orf45	+	2.52766	0.00434586	3.32174	+	+	2.31524	0.00188441	1.95065	+		0.474353	0.425255	1.21857		+	1.93333	0.00148206	1.8549	+	5	5	5	25.4	25.4	25.4	37.743	0	14.386	369970000	14	Q6NTE8;E5RI52;E5RJC6;B7Z1T6;Q6NTE8-2;Q6NTE8-3;A0A087WZ47;E5RHY8;E5RHV0;E7EMV9	Q6NTE8;E5RI52;E5RJC6;B7Z1T6;Q6NTE8-2;Q6NTE8-3	22.7787	21.8946	21.6576	26.2022	25.0733	25.0206	23.9537	24.1116	24.1175	22.4015	21.4724	22.8289	24.6266	24.3521
sp|Q9BRD0|BUD13_HUMAN BUD13 homolog OS=Homo sapiens OX=9606 GN=BUD13 PE=1 SV=1;sp|Q9BRD0-2|BUD13_HUMAN Isoform 2 of BUD13 homolog OS=Homo sapiens OX=9606 GN=BUD13	BUD13 homolog	BUD13	+	2.98402	0.00299507	3.28935	+	+	1.35109	0.0103372	1.37603	+		0.912231	0.123016	4.98259		+	2.81489	0	4.93106	+	22	22	22	36.8	36.8	36.8	70.52	0	180.06	5041200000	92	Q9BRD0;Q9BRD0-2;H7C462	Q9BRD0;Q9BRD0-2	21.5675	22.3933	22.8148	25.7876	25.4538	25.4022	23.2381	24.2323	23.4333	22.3267	23.155	21.0431	29.6898	29.5745
tr|F5GYU3|F5GYU3_HUMAN Polyubiquitin-C (Fragment) OS=Homo sapiens OX=9606 GN=UBC PE=1 SV=1;sp|P0CG48|UBC_HUMAN Polyubiquitin-C OS=Homo sapiens OX=9606 GN=UBC PE=1 SV=3;tr|Q96C32|Q96C32_HUMAN Polyubiquitin-C OS=Homo sapiens OX=9606 GN=UBC PE=1 SV=1;tr|Q5PY6	Polyubiquitin-C;Ubiquitin;Ubiquitin-60S ribosomal protein L40;Ubiquitin;60S ribosomal protein L40;Ubiquitin-40S ribosomal protein S27a;Ubiquitin;40S ribosomal protein S27a;Polyubiquitin-B;Ubiquitin	UBC;UBB;RPS27A;UBA52	+	3.93503	0.000932039	3.2729	+	+	4.11806	0.00050996	4.39992	+	+	2.27867	0.0143243	2.48751	+	+	2.32763	0.000329648	3.41115	+	8	8	3	80.6	80.6	55.2	15.032	0	323.31	384280000000	668	F5GYU3;P0CG48;Q96C32;Q5PY61;J3QKN0;F5GXK7;F5H747;F5H388;B4DV12;F5H265;F5H2Z3;F5H6Q2;J3QTR3;J3QS39;P62987;P62979;P0CG47;Q49A90;M0R1V7;F5GZ39;J3QSA3	F5GYU3;P0CG48;Q96C32;Q5PY61;J3QKN0;F5GXK7;F5H747;F5H388;B4DV12;F5H265;F5H2Z3;F5H6Q2;J3QTR3;J3QS39;P62987;P62979;P0CG47;Q49A90;M0R1V7	30.9587	30.9562	30.303	33.9892	34.0416	34.0059	34.9688	35.4364	35.0126	30.5162	30.2077	30.2133	32.1609	32.5977
tr|E9PCW1|E9PCW1_HUMAN Golgi SNAP receptor complex member 1 OS=Homo sapiens OX=9606 GN=GOSR1 PE=1 SV=1;sp|O95249|GOSR1_HUMAN Golgi SNAP receptor complex member 1 OS=Homo sapiens OX=9606 GN=GOSR1 PE=1 SV=1;tr|K7EJC8|K7EJC8_HUMAN Golgi SNAP receptor complex	Golgi SNAP receptor complex member 1	GOSR1		NaN	1	0			NaN	1	0			1.32799	0.0551336	-2.81867		+	0.993028	0.0130758	-2.44637		6	6	6	37.5	37.5	37.5	28.293	0	28.04	600050000	16	E9PCW1;O95249;K7EJC8;G5E9T8;B4DQA8;O95249-2;F6RU00	E9PCW1;O95249;K7EJC8;G5E9T8;B4DQA8;O95249-2	21.3651	22.1798	21.7158	22.5695	22.1272	21.3923	22.4006	21.264	22.0805	25.2318	25.4634	25.8249	21.4307	24.615
sp|Q01082|SPTB2_HUMAN Spectrin beta chain, non-erythrocytic 1 OS=Homo sapiens OX=9606 GN=SPTBN1 PE=1 SV=2;tr|A0A087WUZ3|A0A087WUZ3_HUMAN Spectrin beta chain OS=Homo sapiens OX=9606 GN=SPTBN1 PE=1 SV=1;sp|Q01082-2|SPTB2_HUMAN Isoform Short of Spectrin beta	Spectrin beta chain, non-erythrocytic 1	SPTBN1		0.0986456	0.888753	-0.277903		+	2.30027	0.00149442	5.65301	+		0.315149	0.618179	0.699684			1.20567	0.0791421	0.244377		92	92	8	52.4	52.4	4.6	274.61	0	323.31	16498000000	337	Q01082;A0A087WUZ3;Q01082-2;F8W6C1;A4QPE4	Q01082;A0A087WUZ3;Q01082-2	21.4262	24.5632	21.6909	22.247	22.1209	22.4788	28.3468	28.2964	27.9963	28.8261	28.9368	28.7128	28.4971	28.7469
sp|Q0VDD8-4|DYH14_HUMAN Isoform 4 of Dynein heavy chain 14, axonemal OS=Homo sapiens OX=9606 GN=DNAH14;sp|Q0VDD8-3|DYH14_HUMAN Isoform 3 of Dynein heavy chain 14, axonemal OS=Homo sapiens OX=9606 GN=DNAH14;sp|Q0VDD8-2|DYH14_HUMAN Isoform 2 of Dynein heavy	Dynein heavy chain 14, axonemal	DNAH14	+	1.40593	0.0324929	3.26429	+	+	3.50694	0.00107094	4.59538	+		0.30948	0.602874	1.28568		+	2.90566	0	4.63974	+	9	9	9	3	3	3	518.56	0	81.387	3836600000	45	Q0VDD8-4;Q0VDD8-3;Q0VDD8-2;M9MMK7;Q0VDD8;H7C374;H9KV43;A0A1W2PR53;H7BXS7	Q0VDD8-4;Q0VDD8-3;Q0VDD8-2;M9MMK7;Q0VDD8	21.3195	21.5185	21.8608	25.9976	22.693	25.801	25.4766	26.3027	26.7056	22.0385	23.9018	22.6172	24.9691	26.4044
tr|E9PDF6|E9PDF6_HUMAN Unconventional myosin-Ib OS=Homo sapiens OX=9606 GN=MYO1B PE=1 SV=1;sp|O43795-2|MYO1B_HUMAN Isoform 2 of Unconventional myosin-Ib OS=Homo sapiens OX=9606 GN=MYO1B;sp|O43795|MYO1B_HUMAN Unconventional myosin-Ib OS=Homo sapiens OX=9606	Unconventional myosin-Ib	MYO1B		NaN	1	0			NaN	1	0			1.18592	0.0682804	3.84732		+	2.11292	0.000580703	3.26258	+	18	18	18	24.4	24.4	24.4	128.48	0	101.2	1060400000	29	E9PDF6;O43795-2;O43795;E7EQD9;H7C2Y7;C9JYW1;C9JUP5;A0A0U1RRI3;C9K0I9;Q9UBC5	E9PDF6;O43795-2;O43795;E7EQD9	21.7677	21.6797	23.0592	21.9092	22.6013	21.5444	21.5163	23.4759	21.6418	20.9748	22.2575	22.8247	27.0534	27.514
sp|Q9NW82|WDR70_HUMAN WD repeat-containing protein 70 OS=Homo sapiens OX=9606 GN=WDR70 PE=1 SV=1;tr|D6RIW8|D6RIW8_HUMAN WD repeat-containing protein 70 OS=Homo sapiens OX=9606 GN=WDR70 PE=1 SV=1	WD repeat-containing protein 70	WDR70	+	4.08891	0.00103226	3.26113	+	+	5.63692	0	3.67009	+		0.360337	0.547508	1.15844		+	1.83156	0.00151636	3.33156	+	13	13	13	25.1	25.1	25.1	73.2	0	37.307	1747100000	37	Q9NW82;D6RIW8	Q9NW82;D6RIW8	22.5865	22.5033	22.4496	25.9447	25.9932	25.3849	26.3013	26.2236	26.0247	22.1971	24.5072	21.9813	25.3597	24.8668
sp|P60842|IF4A1_HUMAN Eukaryotic initiation factor 4A-I OS=Homo sapiens OX=9606 GN=EIF4A1 PE=1 SV=1;sp|P60842-2|IF4A1_HUMAN Isoform 2 of Eukaryotic initiation factor 4A-I OS=Homo sapiens OX=9606 GN=EIF4A1;tr|J3KT12|J3KT12_HUMAN RNA helicase OS=Homo sapiens	Eukaryotic initiation factor 4A-I;Eukaryotic initiation factor 4A-II;Eukaryotic initiation factor 4A-II, N-terminally processed	EIF4A1;EIF4A2	+	2.94901	0.00388732	3.23548	+	+	4.40574	0	5.27293	+	+	1.59274	0.0390197	2.21688	+	+	3.41821	0	5.23546	+	14	12	12	41.4	36.9	36.9	46.153	0	87.44	3489700000	53	P60842;P60842-2;J3KT12;J3QS69;J3KTB5;J3KSZ0;J3QL43;Q14240-2;Q14240;E7EQG2;J3QR64;J3KTN0;J3QLN6;J3KS25;J3QKZ9;J3KT04;J3KSN7;E7EMV8;J3KS93	P60842;P60842-2;J3KT12;J3QS69;J3KTB5;J3KSZ0;J3QL43;Q14240-2;Q14240;E7EQG2;J3QR64	22.0213	22.3882	21.8922	24.7533	25.9873	25.2675	27.7732	27.0027	27.3446	21.9575	21.5128	23.084	24.4124	25.1493
sp|P46100|ATRX_HUMAN Transcriptional regulator ATRX OS=Homo sapiens OX=9606 GN=ATRX PE=1 SV=5;sp|P46100-3|ATRX_HUMAN Isoform 2 of Transcriptional regulator ATRX OS=Homo sapiens OX=9606 GN=ATRX;sp|P46100-2|ATRX_HUMAN Isoform 1 of Transcriptional regulator A	Transcriptional regulator ATRX	ATRX	+	1.57551	0.0247377	3.22243	+	+	2.72109	0.00117269	6.57227	+	+	2.74796	0.01528	6.86178	+	+	4.88078	0	10.5127	+	113	113	0	45.6	45.6	0	282.58	0	323.31	152670000000	1321	P46100;P46100-3;P46100-2;H0Y3T0;A0A096LNX6;A0A096LP59;A0A096LNR8	P46100;P46100-3;P46100-2	24.3035	27.0914	26.9157	28.8002	29.6613	29.5163	32.7283	32.5438	32.7553	23.0759	21.769	22.8474	30.5222	29.9717
sp|Q969G9|NKD1_HUMAN Protein naked cuticle homolog 1 OS=Homo sapiens OX=9606 GN=NKD1 PE=1 SV=1	Protein naked cuticle homolog 1	NKD1		0.18345	0.788382	0.364377		+	3.06812	0.00115862	5.61403	+		0.36256	0.52623	2.23518			NaN	1	0		16	16	16	51.7	51.7	51.7	52.284	0	243.3	2186700000	62	Q969G9	Q969G9	22.2745	21.2949	23.2843	23.6085	22.3682	21.9702	27.4015	28.1672	28.1271	22.3472	22.3729	21.871	21.2617	22.5196
sp|P19532|TFE3_HUMAN Transcription factor E3 OS=Homo sapiens OX=9606 GN=TFE3 PE=1 SV=4	Transcription factor E3	TFE3	+	2.16152	0.0101714	3.21538	+	+	2.46051	0.00144492	3.82327	+		0.738431	0.222883	2.05416		+	3.00866	0	2.66991	+	6	6	4	16.3	16.3	13.6	61.52	0	74.902	1236600000	36	P19532;B7Z757;P19532-2;O14948-3;O14948-4;O14948-2;O14948;A0A1B0GXL9;B1AKB4	P19532	22.0784	23.0819	20.959	25.3382	25.4395	24.9877	25.8432	26.0019	25.744	22.2178	23.0932	23.1601	26.2708	25.9563
sp|Q96S55-2|WRIP1_HUMAN Isoform 2 of ATPase WRNIP1 OS=Homo sapiens OX=9606 GN=WRNIP1;sp|Q96S55|WRIP1_HUMAN ATPase WRNIP1 OS=Homo sapiens OX=9606 GN=WRNIP1 PE=1 SV=2;sp|Q96S55-3|WRIP1_HUMAN Isoform 3 of ATPase WRNIP1 OS=Homo sapiens OX=9606 GN=WRNIP1	ATPase WRNIP1	WRNIP1	+	2.72464	0.00388382	3.20074	+	+	5.74991	0	5.26908	+		0.968138	0.12155	2.2118		+	4.15986	0	5.00337	+	20	20	20	36.4	36.4	36.4	69.458	0	262.6	4301600000	105	Q96S55-2;Q96S55;Q96S55-3;Q96S55-4	Q96S55-2;Q96S55;Q96S55-3	22.1092	22.1983	21.9456	26.1238	24.6791	25.0524	27.4189	27.4813	27.1601	23.17	22.3487	22.7757	26.4735	25.4875
tr|A0A087X0H9|A0A087X0H9_HUMAN RNA-binding protein 26 OS=Homo sapiens OX=9606 GN=RBM26 PE=1 SV=1;sp|Q5T8P6-3|RBM26_HUMAN Isoform 3 of RNA-binding protein 26 OS=Homo sapiens OX=9606 GN=RBM26;sp|Q5T8P6-5|RBM26_HUMAN Isoform 5 of RNA-binding protein 26 OS=Hom	RNA-binding protein 26	RBM26	+	2.90371	0.00379817	3.18896	+	+	1.96456	0.0027293	2.38852	+		1.26177	0.0565753	4.42087		+	2.19627	0.000390698	3.30138	+	16	15	1	19.2	18	1.2	113.79	0	123.85	1559200000	53	A0A087X0H9;Q5T8P6-3;Q5T8P6-5;Q5T8P6-4;Q5T8P6-6;E2PSN0	A0A087X0H9;Q5T8P6-3;Q5T8P6-5;Q5T8P6-4	22.0016	22.8648	23.3259	26.0363	25.8713	25.8516	24.8384	24.6806	25.8389	21.6129	22.918	21.5709	27.9575	28.1181
sp|Q8WUA2|PPIL4_HUMAN Peptidyl-prolyl cis-trans isomerase-like 4 OS=Homo sapiens OX=9606 GN=PPIL4 PE=1 SV=1	Peptidyl-prolyl cis-trans isomerase-like 4	PPIL4	+	2.25191	0.00865574	3.15416	+	+	2.47761	0.00155274	3.49366	+		0.539744	0.336068	2.4056		+	1.56114	0.00233718	3.19128	+	13	13	13	36.4	36.4	36.4	57.224	0	139.9	2052400000	55	Q8WUA2	Q8WUA2	23.2855	21.4271	22.7559	26.0026	25.4937	25.4345	26.1398	25.9288	25.8808	24.9959	22.5912	21.903	27.6555	26.9156
tr|E9PHV5|E9PHV5_HUMAN Protein ITPRID2 OS=Homo sapiens OX=9606 GN=ITPRID2 PE=1 SV=1;sp|P28290-2|ITPI2_HUMAN Isoform 2 of Protein ITPRID2 OS=Homo sapiens OX=9606 GN=ITPRID2;sp|P28290|ITPI2_HUMAN Protein ITPRID2 OS=Homo sapiens OX=9606 GN=ITPRID2 PE=1 SV=3;s	Sperm-specific antigen 2	SSFA2		NaN	1	0			NaN	1	0		+	1.40357	0.0485013	3.4942	+	+	1.27126	0.00617866	2.14663	+	13	13	13	14.2	14.2	14.2	136.14	0	75.493	577300000	23	E9PHV5;P28290-2;P28290;P28290-3;E7EUL7;H7BZ26	E9PHV5;P28290-2;P28290;P28290-3;E7EUL7	21.9119	21.5838	22.2729	22.6519	21.5356	22.8605	22.2582	20.7247	22.7433	21.3995	21.9289	21.8071	27.1931	25.2126
tr|E9PI08|E9PI08_HUMAN Farnesylated proteins-converting enzyme 2 OS=Homo sapiens OX=9606 GN=RCE1 PE=1 SV=1;sp|Q9Y256|FACE2_HUMAN CAAX prenyl protease 2 OS=Homo sapiens OX=9606 GN=RCE1 PE=1 SV=1;tr|E9PKA7|E9PKA7_HUMAN Farnesylated proteins-converting enzyme	CAAX prenyl protease 2	RCE1		NaN	1	0			NaN	1	0			0.683132	0.366121	-0.411497		+	3.82418	0	-2.14893		3	3	3	11.7	11.7	11.7	33.429	0	12.509	179190000	18	E9PI08;Q9Y256;E9PKA7;E9PPV9	E9PI08;Q9Y256;E9PKA7	22.3705	22.0823	22.7714	21.5084	23.2884	21.9542	21.627	21.455	22.3868	24.8629	24.3665	24.6012	24.0532	23.8873
tr|E9PN66|E9PN66_HUMAN Tumor protein p53-inducible protein 11 (Fragment) OS=Homo sapiens OX=9606 GN=TP53I11 PE=1 SV=1;tr|E9PKN9|E9PKN9_HUMAN Tumor protein p53-inducible protein 11 (Fragment) OS=Homo sapiens OX=9606 GN=TP53I11 PE=1 SV=1;tr|E9PS55|E9PS55_HUM	Tumor protein p53-inducible protein 11	TP53I11		NaN	1	0			NaN	1	0			1.47407	0.115816	-0.486314		+	2.55508	0.000775758	-1.09101		3	3	3	54.8	54.8	54.8	6.8649	0	19.076	1545400000	37	E9PN66;E9PKN9;E9PS55;E9PMW4;E9PQ46;E9PIN5;E9PIK4;U3KQ32;E9PKZ4;E9PPM1;O14683;E9PNB3;E9PMY0	E9PN66;E9PKN9;E9PS55;E9PMW4;E9PQ46;E9PIN5;E9PIK4;U3KQ32;E9PKZ4;E9PPM1;O14683;E9PNB3;E9PMY0	22.2393	21.9876	22.8183	21.4938	22.9753	22.2809	21.9236	21.7193	22.3337	27.1162	26.6755	26.7924	26.2788	26.5286
tr|E9PIN3|E9PIN3_HUMAN Nuclear RNA export factor 1 (Fragment) OS=Homo sapiens OX=9606 GN=NXF1 PE=1 SV=1;sp|Q9UBU9|NXF1_HUMAN Nuclear RNA export factor 1 OS=Homo sapiens OX=9606 GN=NXF1 PE=1 SV=1;sp|Q9UBU9-2|NXF1_HUMAN Isoform 2 of Nuclear RNA export factor	Nuclear RNA export factor 1	NXF1		0.340067	0.497387	-1.19481			0.600418	0.0957682	1.89964			NaN	1	0		+	1.83025	0.00151274	3.27058	+	8	8	8	22.7	22.7	22.7	68.106	0	48.506	980970000	41	E9PIN3;Q9UBU9;Q9UBU9-2;B4E227;E9PLA7;E9PMV7	E9PIN3;Q9UBU9;Q9UBU9-2;B4E227;E9PLA7	22.2526	26.5131	22.2896	22.084	23.1507	22.2362	25.7395	25.4625	25.5523	21.5935	20.9445	23.5573	21.5229	22.7275
sp|Q1ED39|KNOP1_HUMAN Lysine-rich nucleolar protein 1 OS=Homo sapiens OX=9606 GN=KNOP1 PE=1 SV=1;tr|H3BPL4|H3BPL4_HUMAN Lysine-rich nucleolar protein 1 (Fragment) OS=Homo sapiens OX=9606 GN=KNOP1 PE=1 SV=2	Lysine-rich nucleolar protein 1	KNOP1	+	2.20963	0.00879743	3.1526	+	+	1.43758	0.00676147	1.95943	+		0.978835	0.105224	4.17529		+	4.36868	0	6.76528	+	23	23	23	60.7	60.7	60.7	51.588	0	323.31	8703500000	129	Q1ED39;H3BPL4;H3BNU8;H3BMC9	Q1ED39;H3BPL4	23.3852	22.62	24.6136	26.9673	26.5922	26.5171	25.0338	25.5553	25.908	21.983	21.7918	22.9031	28.6249	28.1049
sp|Q9Y388|RBMX2_HUMAN RNA-binding motif protein, X-linked 2 OS=Homo sapiens OX=9606 GN=RBMX2 PE=1 SV=2;tr|A0A1W2PP04|A0A1W2PP04_HUMAN RNA-binding motif protein, X-linked 2 OS=Homo sapiens OX=9606 GN=RBMX2 PE=1 SV=1	RNA-binding motif protein, X-linked 2	RBMX2	+	3.22569	0.00285714	3.14911	+	+	2.70569	0.00142123	2.46467	+		0.832663	0.163112	3.27613		+	3.50521	0	3.77428	+	9	9	9	26.1	26.1	26.1	37.335	0	78.031	1578500000	35	Q9Y388;A0A1W2PP04;Q5JY83	Q9Y388;A0A1W2PP04	21.2954	21.9256	22.3805	25.1229	24.9329	24.9931	24.4618	24.471	24.0627	21.6153	22.2058	22.3599	27.2985	26.991
tr|J3QQJ0|J3QQJ0_HUMAN SAP30-binding protein (Fragment) OS=Homo sapiens OX=9606 GN=SAP30BP PE=1 SV=1;sp|Q9UHR5-2|S30BP_HUMAN Isoform 2 of SAP30-binding protein OS=Homo sapiens OX=9606 GN=SAP30BP;sp|Q9UHR5|S30BP_HUMAN SAP30-binding protein OS=Homo sapiens O	SAP30-binding protein	SAP30BP	+	2.8	0.0036	3.14155	+	+	2.49814	0.00149746	2.61085	+		1.15358	0.076	2.85504		+	6.09634	0	4.95214	+	6	6	6	26.5	26.5	26.5	35.772	0	22.293	1555600000	20	J3QQJ0;Q9UHR5-2;Q9UHR5;X6R3T8;J3QLH3;J3QLM2;J3KRR6;F5H478;J3KRU5;J3KS14	J3QQJ0;Q9UHR5-2;Q9UHR5;X6R3T8;J3QLH3;J3QLM2;J3KRR6;F5H478;J3KRU5	21.4225	22.1042	22.7902	25.0135	25.36	25.368	24.7421	24.9065	24.5009	21.4479	21.5848	21.7064	25.9369	25.2182
tr|A0A2U3U043|A0A2U3U043_HUMAN BTB/POZ domain-containing protein KCTD1 OS=Homo sapiens OX=9606 GN=KCTD1 PE=1 SV=1		KCTD1	+	1.27277	0.0379363	3.12167	+	+	1.93287	0.00243822	5.12638	+	+	1.73104	0.0287312	2.78623	+	+	4.36544	0	4.17355	+	21	21	20	32.7	32.7	30.1	96.413	0	232.52	4692300000	118	A0A2U3U043;J3QRK1;Q719H9;J3KSG1;J3QLL6;E9PK99;E9PMS5;E9PRT1;E9PJJ5;Q4G0X4	A0A2U3U043	20.597	22.2313	24.5273	25.7598	25.697	25.2638	27.1447	27.625	27.965	23.9578	23.5865	23.2985	27.4611	26.6656
tr|H3BSS6|H3BSS6_HUMAN Zinc finger protein 106 OS=Homo sapiens OX=9606 GN=ZNF106 PE=1 SV=2;sp|Q9H2Y7|ZN106_HUMAN Zinc finger protein 106 OS=Homo sapiens OX=9606 GN=ZNF106 PE=1 SV=1;sp|Q9H2Y7-2|ZN106_HUMAN Isoform 2 of Zinc finger protein 106 OS=Homo sapien	Zinc finger protein 106	ZNF106	+	1.29445	0.0365887	3.10152	+	+	2.66364	0.00115263	7.74752	+	+	1.42689	0.0435213	4.81129	+	+	3.87186	0	8.73594	+	72	72	72	52.2	52.2	52.2	211.95	0	323.31	44003000000	599	H3BSS6;Q9H2Y7;Q9H2Y7-2;A0A0C4DGM5;H3BNX5;H3BS99;H3BNJ4;U3KQH7;H3BRD4;O95455	H3BSS6;Q9H2Y7;Q9H2Y7-2;A0A0C4DGM5	24.9828	21.9639	21.4442	26.2805	25.8609	25.5541	30.5012	30.5172	30.615	21.7105	23.8014	22.6436	28.9392	29.0155
tr|E9PKZ0|E9PKZ0_HUMAN 60S ribosomal protein L8 (Fragment) OS=Homo sapiens OX=9606 GN=RPL8 PE=1 SV=1;sp|P62917|RL8_HUMAN 60S ribosomal protein L8 OS=Homo sapiens OX=9606 GN=RPL8 PE=1 SV=2;tr|G3V1A1|G3V1A1_HUMAN 60S ribosomal protein L8 OS=Homo sapiens OX=9	60S ribosomal protein L8	RPL8		1.00907	0.126276	-0.663349			0.653709	0.204614	-0.299499			0.0380391	0.955522	-0.064188		+	1.39379	0.00797372	0.873053	+	10	10	10	44.4	44.4	44.4	22.389	0	42.623	2568200000	104	E9PKZ0;P62917;G3V1A1;E9PKU4;E9PP36	E9PKZ0;P62917;G3V1A1;E9PKU4	26.6512	26.8197	26.7514	25.601	26.6443	25.9869	26.2053	26.8419	26.2765	25.8649	25.688	26.1064	25.1739	25.3564
sp|Q08J23|NSUN2_HUMAN RNA cytosine C(5)-methyltransferase NSUN2 OS=Homo sapiens OX=9606 GN=NSUN2 PE=1 SV=2;sp|Q08J23-2|NSUN2_HUMAN Isoform 2 of RNA cytosine C(5)-methyltransferase NSUN2 OS=Homo sapiens OX=9606 GN=NSUN2;sp|Q08J23-3|NSUN2_HUMAN Isoform 3 of	tRNA (cytosine(34)-C(5))-methyltransferase	NSUN2	+	2.54394	0.00428148	3.0749	+	+	3.79263	0.000771242	5.9422	+	+	1.64472	0.0318503	4.21828	+	+	4.14692	0	6.80091	+	26	26	26	42	42	42	86.47	0	323.31	7957200000	180	Q08J23;Q08J23-2;Q08J23-3;A0A140T9Y7	Q08J23;Q08J23-2;Q08J23-3	21.8914	23.1432	21.8404	25.7482	25.2925	25.059	28.3686	28.1919	28.1411	21.4941	22.8036	21.75	27.496	27.1628
sp|P46087|NOP2_HUMAN Probable 28S rRNA (cytosine(4447)-C(5))-methyltransferase OS=Homo sapiens OX=9606 GN=NOP2 PE=1 SV=2;sp|P46087-4|NOP2_HUMAN Isoform 4 of Probable 28S rRNA (cytosine(4447)-C(5))-methyltransferase OS=Homo sapiens OX=9606 GN=NOP2;sp|P46087	Probable 28S rRNA (cytosine(4447)-C(5))-methyltransferase	NOP2	+	1.23927	0.0407801	3.07467	+	+	1.19999	0.0107718	2.96965	+	+	2.19755	0.0148252	3.49775	+	+	5.18921	0	3.95514	+	15	15	15	21.8	21.8	21.8	89.301	0	64.58	1678100000	59	P46087;P46087-4;P46087-2;P46087-3;F5GYR3;F5GWB7;F5H709;F5H5X6	P46087;P46087-4;P46087-2;P46087-3	22.0101	21.8246	25.3973	26.0268	26.3382	26.091	26.0026	26.1785	25.9598	22.0772	21.9844	22.0529	26.2382	26.1672
sp|Q969Z0|FAKD4_HUMAN FAST kinase domain-containing protein 4 OS=Homo sapiens OX=9606 GN=TBRG4 PE=1 SV=1;sp|Q969Z0-2|FAKD4_HUMAN Isoform 2 of FAST kinase domain-containing protein 4 OS=Homo sapiens OX=9606 GN=TBRG4;tr|C9J7P5|C9J7P5_HUMAN FAST kinase domain	Protein TBRG4	TBRG4		NaN	1	0		+	4.81166	0	5.48625	+		1.82122	0.0951037	-0.422254		+	1.39272	0.0109499	-0.664111		21	21	21	50.2	50.2	50.2	70.737	0	280.65	3438400000	135	Q969Z0;Q969Z0-2;C9J7P5;C9IZN7;C9J5A2;C9J347;H7C4R5;C9J618	Q969Z0;Q969Z0-2;C9J7P5	21.6129	22.0888	21.3845	22.5344	21.5245	21.9069	27.1554	27.321	27.0685	27.725	27.5165	27.7249	27.3329	27.2843
sp|Q08945|SSRP1_HUMAN FACT complex subunit SSRP1 OS=Homo sapiens OX=9606 GN=SSRP1 PE=1 SV=1	FACT complex subunit SSRP1	SSRP1	+	2.57407	0.00437879	3.01255	+	+	3.86172	0.000833922	5.99321	+	+	2.46129	0.0150909	5.30634	+	+	5.39975	0	7.99009	+	27	27	27	38.8	38.8	38.8	81.074	0	303.89	14135000000	184	Q08945;E9PMD4;A0A0U1RRK2;E9PPZ7	Q08945	20.924	21.5877	22.256	24.9638	24.695	24.1465	27.7811	27.2572	27.709	21.8498	21.9683	21.8916	28.0934	28.0378
sp|Q9NQZ2|SAS10_HUMAN Something about silencing protein 10 OS=Homo sapiens OX=9606 GN=UTP3 PE=1 SV=1	Something about silencing protein 10	UTP3	+	3.29845	0.00297619	3.00985	+	+	3.00295	0.00110746	2.22629	+		0.502534	0.384764	1.45248		+	2.34594	0.000410156	2.57887	+	5	5	5	19.8	19.8	19.8	54.557	0	225.91	661670000	35	Q9NQZ2	Q9NQZ2	22.3625	21.6561	21.6905	24.5959	25.222	24.9208	24.0347	23.9908	24.3624	23.2978	22.1222	21.9145	25.1224	25.0475
tr|E9PMM3|E9PMM3_HUMAN Peroxisomal membrane protein PEX16 (Fragment) OS=Homo sapiens OX=9606 GN=PEX16 PE=1 SV=1;sp|Q9Y5Y5|PEX16_HUMAN Peroxisomal membrane protein PEX16 OS=Homo sapiens OX=9606 GN=PEX16 PE=1 SV=2;sp|Q9Y5Y5-2|PEX16_HUMAN Isoform 2 of Peroxis	Peroxisomal membrane protein PEX16	PEX16		NaN	1	0			0.68907	0.0932613	0.768043			0.141894	0.822682	-0.489405		+	3.18225	0.00263636	0.43921	+	3	3	3	21.9	21.9	21.9	21.165	0	4.8741	383560000	11	E9PMM3;Q9Y5Y5;Q9Y5Y5-2;E9PQW0;E9PMS3;E9PLS4;E9PP98	E9PMM3;Q9Y5Y5;Q9Y5Y5-2;E9PQW0	21.959	21.5112	22.1221	21.3078	21.1061	22.5795	22.48	21.8991	23.5174	23.7635	23.8221	23.8016	20.8471	23.9323
tr|K4DIA7|K4DIA7_HUMAN Tetraspanin (Fragment) OS=Homo sapiens OX=9606 GN=CD151 PE=1 SV=1;tr|E9PMR4|E9PMR4_HUMAN Tetraspanin OS=Homo sapiens OX=9606 GN=CD151 PE=1 SV=1;sp|P48509|CD151_HUMAN CD151 antigen OS=Homo sapiens OX=9606 GN=CD151 PE=1 SV=3;tr|E9PRJ3|	Tetraspanin;CD151 antigen	CD151		NaN	1	0			NaN	1	0			0.160208	0.854797	-0.112317			0.0764075	0.93036	-0.0469151		4	4	4	26.1	26.1	26.1	25.588	0	31.061	734920000	15	K4DIA7;E9PMR4;P48509;E9PRJ3;E9PJC8;E9PLZ6;K4DIB7	K4DIA7;E9PMR4;P48509;E9PRJ3	23.501	22.3797	23.0522	21.6938	22.0801	21.3589	20.8922	22.3464	22.5562	25.6266	25.3469	25.2757	25.7783	25.1355
tr|E9PQ47|E9PQ47_HUMAN Zinc finger protein-like 1 (Fragment) OS=Homo sapiens OX=9606 GN=ZFPL1 PE=1 SV=1;tr|E9PNY1|E9PNY1_HUMAN Zinc finger protein-like 1 (Fragment) OS=Homo sapiens OX=9606 GN=ZFPL1 PE=1 SV=1;sp|O95159|ZFPL1_HUMAN Zinc finger protein-like 1	Zinc finger protein-like 1	ZFPL1		0.11702	0.8658	-0.390348			0.331782	0.398718	1.16662		+	2.90163	0.0302035	-0.569458		+	2.21716	0.00124104	-1.31307		6	6	6	40.4	40.4	40.4	20.607	0	15.885	846910000	31	E9PQ47;E9PNY1;O95159;E9PMQ3;E9PQA5;E9PJX1;E9PJ47;H0YCU8	E9PQ47;E9PNY1;O95159;E9PMQ3;E9PQA5	20.5916	22.3043	24.5848	22.4315	21.3705	22.5076	21.9626	24.1595	24.8585	26.2014	26.1183	25.9993	25.4625	25.5913
tr|E7EWM3|E7EWM3_HUMAN Zinc finger MIZ domain-containing protein 2 OS=Homo sapiens OX=9606 GN=ZMIZ2 PE=1 SV=1;tr|A0A087X127|A0A087X127_HUMAN Zinc finger MIZ domain-containing protein 2 OS=Homo sapiens OX=9606 GN=ZMIZ2 PE=1 SV=1;sp|Q8NF64-3|ZMIZ2_HUMAN Isof	Zinc finger MIZ domain-containing protein 2	ZMIZ2	+	1.78421	0.0204187	3.00906	+	+	2.4429	0.00147459	4.65527	+		1.0013	0.110592	2.35694		+	4.43023	0	5.97996	+	8	4	4	14.1	7.2	7.2	93.667	0	73.361	4900100000	69	E7EWM3;A0A087X127;Q8NF64-3;Q8NF64-2;Q8NF64	E7EWM3;A0A087X127;Q8NF64-3;Q8NF64-2;Q8NF64	20.6924	22.9198	23.0007	25.2358	25.1772	25.2271	27.0077	26.7363	26.8347	22.7496	21.7313	22.3048	25.9503	25.391
tr|E9PRI1|E9PRI1_HUMAN Crossover junction endonuclease MUS81 OS=Homo sapiens OX=9606 GN=MUS81 PE=1 SV=1;sp|Q96NY9|MUS81_HUMAN Crossover junction endonuclease MUS81 OS=Homo sapiens OX=9606 GN=MUS81 PE=1 SV=3;tr|H0YDE3|H0YDE3_HUMAN Crossover junction endonuc	Crossover junction endonuclease MUS81	MUS81		NaN	1	0			NaN	1	0			NaN	1	0		+	3.41786	0	3.92125	+	5	5	5	22.7	22.7	22.7	52.289	0	64.686	732910000	9	E9PRI1;Q96NY9;H0YDE3;H0YDU2;H0YDK3;H0YE94;E9PL60;E9PII7	E9PRI1;Q96NY9;H0YDE3;H0YDU2	21.9629	22.7952	21.8539	21.9941	21.9104	22.0968	22.0344	22.2197	22.6434	21.4614	21.6731	21.852	22.7462	22.2343
tr|F1T0I1|F1T0I1_HUMAN Protein transport protein sec16 OS=Homo sapiens OX=9606 GN=SEC16A PE=1 SV=1;sp|O15027-2|SC16A_HUMAN Isoform 2 of Protein transport protein Sec16A OS=Homo sapiens OX=9606 GN=SEC16A;sp|O15027-4|SC16A_HUMAN Isoform 4 of Protein transpor	Protein transport protein Sec16A	SEC16A		0.411553	0.464743	-0.468		+	0.905342	0.0268371	-2.30543			0.110234	0.872983	-0.390233		+	1.16629	0.00819014	-1.98535		8	8	8	6.6	6.6	6.6	249.48	0	14.678	446530000	15	F1T0I1;O15027-2;O15027-4;O15027-3;O15027;O15027-5;A0A3F2YNX0;A0A3F2YNZ0;A0A0C4DH09;X6RGP5	F1T0I1;O15027-2;O15027-4;O15027-3;O15027;O15027-5;A0A3F2YNX0;A0A3F2YNZ0	25.5675	25.8395	26.8522	25.44	25.2403	26.1749	24.96	21.5377	24.8453	24.7706	25.3544	24.9486	22.1045	25.7176
tr|F5GWH5|F5GWH5_HUMAN Dolichyl-diphosphooligosaccharide--protein glycosyltransferase subunit TMEM258 OS=Homo sapiens OX=9606 GN=TMEM258 PE=1 SV=1;sp|P61165|TM258_HUMAN Transmembrane protein 258 OS=Homo sapiens OX=9606 GN=TMEM258 PE=1 SV=1	Transmembrane protein 258	TMEM258		0.296438	0.596841	-0.731679			0.498096	0.157221	1.51438			0.859623	0.161307	-2.21634		+	4.36852	0	-4.0359		1	1	1	16.3	16.3	16.3	5.7065	0.0055757	2.3631	1082700000	31	F5GWH5;P61165	F5GWH5;P61165	20.6739	21.8142	24.0732	21.4563	21.3421	21.5679	24.0068	22.0577	25.04	26.3742	25.9533	26.403	23.1075	22.5862
tr|F5GX09|F5GX09_HUMAN Protein FAM76B OS=Homo sapiens OX=9606 GN=FAM76B PE=1 SV=1;sp|Q5HYJ3-3|FA76B_HUMAN Isoform 3 of Protein FAM76B OS=Homo sapiens OX=9606 GN=FAM76B;sp|Q5HYJ3-2|FA76B_HUMAN Isoform 2 of Protein FAM76B OS=Homo sapiens OX=9606 GN=FAM76B	Protein FAM76B	FAM76B	+	1.6496	0.0364367	-0.872747		+	3.87746	0.00126623	-1.55405			0.542981	0.39825	-0.71015		+	1.02954	0.0112119	-2.93343		28	2	2	66	9.2	9.2	38.62	0	318.17	4472300000	44	F5GX09;Q5HYJ3-3;Q5HYJ3-2;E9PQL1;Q8TAV0-2;Q8TAV0;F5H5F4;Q8TAV0-5	F5GX09;Q5HYJ3-3;Q5HYJ3-2	27.4706	27.7864	27.7949	27.2122	26.7519	26.4696	26.1386	26.1455	26.1056	28.5168	28.2817	28.6658	27.6458	26.8688
tr|F5GX24|F5GX24_HUMAN G2/M phase-specific E3 ubiquitin-protein ligase OS=Homo sapiens OX=9606 GN=G2E3 PE=1 SV=1;tr|G3V483|G3V483_HUMAN G2/M phase-specific E3 ubiquitin-protein ligase OS=Homo sapiens OX=9606 GN=G2E3 PE=1 SV=1;sp|Q7L622|G2E3_HUMAN G2/M phas	G2/M phase-specific E3 ubiquitin-protein ligase	G2E3		NaN	1	0			0.671558	0.0676117	2.53245			NaN	1	0		+	1.44106	0.00349012	2.89392	+	5	5	5	9.8	9.8	9.8	75.085	0	15.279	1285200000	8	F5GX24;G3V483;Q7L622;H0YH90;H0YI49;A0A3B3ISH7	F5GX24;G3V483;Q7L622	23.1121	22.7485	23.0934	22.611	22.0783	21.4869	27.4405	26.9987	22.1121	23.5747	21.9342	20.5546	21.6202	22.2089
sp|Q9NR30|DDX21_HUMAN Nucleolar RNA helicase 2 OS=Homo sapiens OX=9606 GN=DDX21 PE=1 SV=5;sp|Q9NR30-2|DDX21_HUMAN Isoform 2 of Nucleolar RNA helicase 2 OS=Homo sapiens OX=9606 GN=DDX21	Nucleolar RNA helicase 2	DDX21	+	1.47591	0.0300196	2.99452	+	+	1.25816	0.00999138	2.45738	+	+	1.69482	0.0277509	4.03581	+	+	4.3069	0	4.63068	+	24	24	22	40.5	40.5	38.6	87.343	0	144.38	4371900000	97	Q9NR30;Q9NR30-2	Q9NR30;Q9NR30-2	23.6076	22.0933	25.2608	27.0846	26.4752	26.3855	26.0374	26.0647	26.2317	23.264	22.9699	22.5284	28.3265	27.6703
tr|A0A0A0MTR7|A0A0A0MTR7_HUMAN E3 ubiquitin-protein ligase RNF213 OS=Homo sapiens OX=9606 GN=RNF213 PE=1 SV=1;tr|A0A0A0MTC1|A0A0A0MTC1_HUMAN E3 ubiquitin-protein ligase RNF213 OS=Homo sapiens OX=9606 GN=RNF213 PE=1 SV=1;sp|Q63HN8|RN213_HUMAN E3 ubiquitin-p	E3 ubiquitin-protein ligase RNF213	RNF213		NaN	1	0		+	4.39582	0	5.4735	+		0.409393	0.466797	-2.53509			0.481907	0.135963	2.30845		14	14	14	4.3	4.3	4.3	591.4	0	55.396	11366000000	24	A0A0A0MTR7;A0A0A0MTC1;Q63HN8;Q63HN8-4;Q63HN8-6	A0A0A0MTR7;A0A0A0MTC1;Q63HN8;Q63HN8-4	21.9757	21.78	22.0825	21.6062	21.9543	21.1096	27.9097	27.3503	26.9986	28.2543	28.0495	21.9551	22.0305	26.8011
sp|Q8NB50|ZFP62_HUMAN Zinc finger protein 62 homolog OS=Homo sapiens OX=9606 GN=ZFP62 PE=1 SV=3;sp|Q8NB50-3|ZFP62_HUMAN Isoform 3 of Zinc finger protein 62 homolog OS=Homo sapiens OX=9606 GN=ZFP62;sp|Q8NB50-2|ZFP62_HUMAN Isoform 2 of Zinc finger protein 62	Zinc finger protein 62 homolog	ZFP62	+	3.87561	0.000834783	2.97631	+	+	3.27798	0.00128365	1.42765	+	+	3.36206	0.0175	3.86974	+	+	4.88431	0	3.48186	+	33	32	26	43	42.2	39.3	102.51	0	227.39	15937000000	457	Q8NB50;Q8NB50-3;Q8NB50-2;D6R9C0;D6RCF6;D6RBG3	Q8NB50;Q8NB50-3;Q8NB50-2	27.4238	27.5328	27.6765	30.8794	30.2204	30.4622	28.7723	28.957	29.1867	25.6246	25.8675	25.8126	30.1809	29.7616
sp|Q9BTT0|AN32E_HUMAN Acidic leucine-rich nuclear phosphoprotein 32 family member E OS=Homo sapiens OX=9606 GN=ANP32E PE=1 SV=1;tr|Q5TB19|Q5TB19_HUMAN Acidic (Leucine-rich) nuclear phosphoprotein 32 family, member E OS=Homo sapiens OX=9606 GN=ANP32E PE=1 S	Acidic leucine-rich nuclear phosphoprotein 32 family member E	ANP32E	+	3.73557	0.000716418	2.97623	+	+	5.00634	0	4.70201	+		1.01375	0.103755	2.82552		+	4.12662	0	6.7105	+	7	7	1	28.7	28.7	6.3	30.692	0	323.31	7332600000	72	Q9BTT0;Q5TB19;E9PLC4;E9PPH5;Q9BTT0-2;H0YCE2;Q5TB25	Q9BTT0;Q5TB19;E9PLC4	22.5231	22.3018	22.7418	25.3483	25.8643	25.2828	27.4395	27.0696	27.1637	21.6943	21.8521	22.7626	26.2882	26.0964
tr|F5GY37|F5GY37_HUMAN Prohibitin OS=Homo sapiens OX=9606 GN=PHB2 PE=1 SV=1;tr|J3KPX7|J3KPX7_HUMAN Prohibitin OS=Homo sapiens OX=9606 GN=PHB2 PE=1 SV=2;sp|Q99623|PHB2_HUMAN Prohibitin-2 OS=Homo sapiens OX=9606 GN=PHB2 PE=1 SV=2;tr|F5H3X6|F5H3X6_HUMAN Prohi	Prohibitin-2	PHB2	+	2.18753	0.0107205	-2.40683		+	2.27365	0.00150851	-3.35196			0.426371	0.544544	-0.427553			0.0279713	0.971256	-0.022803		3	3	3	14.6	14.6	14.6	29.723	0	6.1742	180550000	17	F5GY37;J3KPX7;Q99623;F5H3X6;Q99623-2;F5H2D2;F5H0C5;F5GWA7	F5GY37;J3KPX7;Q99623;F5H3X6;Q99623-2	25.8374	24.6154	25.3003	22.7802	22.3632	23.3893	22.887	21.4882	21.3222	22.8915	23.2595	22.6991	21.7383	22.8249
sp|Q9Y230|RUVB2_HUMAN RuvB-like 2 OS=Homo sapiens OX=9606 GN=RUVBL2 PE=1 SV=3;sp|Q9Y230-2|RUVB2_HUMAN Isoform 2 of RuvB-like 2 OS=Homo sapiens OX=9606 GN=RUVBL2;tr|M0R0Y3|M0R0Y3_HUMAN RuvB-like helicase OS=Homo sapiens OX=9606 GN=RUVBL2 PE=1 SV=1	RuvB-like 2	RUVBL2	+	1.97446	0.0148105	2.96999	+	+	3.10628	0.00119786	5.4235	+		0.760556	0.20844	2.30002		+	4.77318	0	6.38869	+	21	21	21	56.4	56.4	56.4	51.156	0	159.93	6132400000	90	Q9Y230;Q9Y230-2;M0R0Y3;X6R2L4;M0QXI6;M0R0Z0;A0A1W2PS48	Q9Y230;Q9Y230-2;M0R0Y3	24.0556	22.3139	22.2985	26.42	25.3904	25.7674	28.4933	28.2789	28.1662	22.423	21.9734	21.535	25.922	25.3462
tr|F5GYW0|F5GYW0_HUMAN Centrosomal protein of 57 kDa OS=Homo sapiens OX=9606 GN=CEP57 PE=1 SV=1;sp|Q86XR8-4|CEP57_HUMAN Isoform 4 of Centrosomal protein of 57 kDa OS=Homo sapiens OX=9606 GN=CEP57;sp|Q86XR8-5|CEP57_HUMAN Isoform 5 of Centrosomal protein of	Centrosomal protein of 57 kDa	CEP57		NaN	1	0			NaN	1	0			NaN	1	0		+	2.92645	0	2.61059	+	8	8	8	22.4	22.4	22.4	54.526	0	28.318	591780000	15	F5GYW0;Q86XR8-4;Q86XR8-5;Q86XR8;Q86XR8-2;H0YFT8;Q86XR8-3;F5H1B0;F5H0C6;H0YGT4	F5GYW0;Q86XR8-4;Q86XR8-5;Q86XR8;Q86XR8-2;H0YFT8;Q86XR8-3	21.1799	22.7322	22.3625	22.2549	23.3935	21.8051	21.8045	21.4303	23.0519	22.5571	23.4178	22.716	22.4783	22.3491
tr|F5GZ78|F5GZ78_HUMAN Paxillin OS=Homo sapiens OX=9606 GN=PXN PE=1 SV=1;sp|P49023|PAXI_HUMAN Paxillin OS=Homo sapiens OX=9606 GN=PXN PE=1 SV=3;tr|A0A1B0GTU4|A0A1B0GTU4_HUMAN Paxillin OS=Homo sapiens OX=9606 GN=PXN PE=1 SV=1;sp|P49023-4|PAXI_HUMAN Isoform	Paxillin	PXN		NaN	1	0			NaN	1	0			0.21727	0.721403	-0.925008		+	1.65839	0.00179002	3.5034	+	2	2	2	5.6	5.6	5.6	64.232	0	4.6508	1956100000	10	F5GZ78;P49023;A0A1B0GTU4;P49023-4;P49023-2;P49023-3	F5GZ78;P49023;A0A1B0GTU4;P49023-4;P49023-2;P49023-3	21.8096	22.4051	22.1734	21.8379	21.6689	24.5317	21.7215	21.9764	20.8768	22.0566	25.3064	23.5578	20.5314	25.225
sp|Q14814-4|MEF2D_HUMAN Isoform MEF2DA0 of Myocyte-specific enhancer factor 2D OS=Homo sapiens OX=9606 GN=MEF2D;sp|Q14814|MEF2D_HUMAN Myocyte-specific enhancer factor 2D OS=Homo sapiens OX=9606 GN=MEF2D PE=1 SV=1;tr|Q05BX2|Q05BX2_HUMAN MEF2D protein OS=Hom	Myocyte-specific enhancer factor 2D	MEF2D	+	2.9565	0.00381567	2.96088	+	+	1.13886	0.0142967	1.87874	+		NaN	1	0		+	2.47086	0.000335722	2.47369	+	7	7	5	12.8	12.8	8.6	55.113	0	16.724	507370000	17	Q14814-4;Q14814;Q05BX2;Q14814-6;Q14814-5;Q14814-3;Q14814-2	Q14814-4;Q14814;Q05BX2;Q14814-6;Q14814-5	22.2718	21.3594	22.4861	25.0596	24.8553	25.0851	24.5193	24.7018	22.5325	21.2544	21.9163	22.4449	22.973	21.5949
tr|F5GZS6|F5GZS6_HUMAN 4F2 cell-surface antigen heavy chain OS=Homo sapiens OX=9606 GN=SLC3A2 PE=1 SV=1;tr|J3KPF3|J3KPF3_HUMAN 4F2 cell-surface antigen heavy chain OS=Homo sapiens OX=9606 GN=SLC3A2 PE=1 SV=1;sp|P08195-3|4F2_HUMAN Isoform 3 of 4F2 cell-surf	4F2 cell-surface antigen heavy chain	SLC3A2		1.1772	0.0958281	-0.686895			0.389865	0.499609	0.235054			1.61519	0.120361	-0.410709		+	2.54248	0.0267663	-0.223639		34	34	2	67.3	67.3	10.5	64.872	0	323.31	74128000000	731	F5GZS6;J3KPF3;P08195-3;P08195;P08195-4;F5GZI0;H0YFS2;H0YFX4	F5GZS6;J3KPF3;P08195-3;P08195;P08195-4	30.1311	30.4989	30.9662	30.1042	29.6985	29.7327	30.9193	30.6541	30.7279	31.694	31.6244	31.7036	31.4429	31.2941
sp|O14628-5|ZN195_HUMAN Isoform 5 of Zinc finger protein 195 OS=Homo sapiens OX=9606 GN=ZNF195;sp|O14628|ZN195_HUMAN Zinc finger protein 195 OS=Homo sapiens OX=9606 GN=ZNF195 PE=1 SV=2	Zinc finger protein 195	ZNF195	+	2.40917	0.00570242	2.94203	+	+	5.64795	0	7.20169	+		0.0996272	0.886775	0.228521		+	3.64873	0	6.51106	+	36	36	0	58.3	58.3	0	69.691	0	323.31	25735000000	223	O14628-5;O14628;E9PIT0;E9PPF8;E9PIN4;E9PLW9;E9PSE6	O14628-5;O14628	21.3193	21.7512	21.4322	23.8866	24.0574	25.3849	28.5081	28.6697	28.93	24.7666	23.2794	24.8495	25.7944	24.1084
tr|F5H0M4|F5H0M4_HUMAN Lysophospholipid acyltransferase 5 OS=Homo sapiens OX=9606 GN=LPCAT3 PE=1 SV=1;sp|Q6P1A2|MBOA5_HUMAN Lysophospholipid acyltransferase 5 OS=Homo sapiens OX=9606 GN=LPCAT3 PE=1 SV=1;sp|Q6P1A2-2|MBOA5_HUMAN Isoform 2 of Lysophospholipid	Lysophospholipid acyltransferase 5	LPCAT3		NaN	1	0			NaN	1	0			0.774319	0.226002	-1.25904		+	1.7802	0.00160899	-2.15557		3	3	3	15	15	15	39.374	0	136.62	261880000	8	F5H0M4;Q6P1A2;Q6P1A2-2;F5H680;F5H7K7;B7Z3N5;F5GYT3	F5H0M4;Q6P1A2;Q6P1A2-2	23.1188	22.9194	23.6813	22.3357	21.6568	22.0602	21.5035	21.4203	23.301	24.5424	24.3197	24.6248	24.7233	22.4606
sp|Q7Z333|SETX_HUMAN Probable helicase senataxin OS=Homo sapiens OX=9606 GN=SETX PE=1 SV=4;sp|Q7Z333-3|SETX_HUMAN Isoform 3 of Probable helicase senataxin OS=Homo sapiens OX=9606 GN=SETX;sp|Q7Z333-4|SETX_HUMAN Isoform 4 of Probable helicase senataxin OS=Ho	Probable helicase senataxin	SETX	+	3.3809	0.00301205	2.89683	+	+	4.71488	0	8.38672	+		0.932151	0.12719	2.83709		+	3.82256	0	8.34962	+	87	87	87	42.6	42.6	42.6	302.88	0	323.31	28526000000	500	Q7Z333;Q7Z333-3;Q7Z333-4;X6RI79	Q7Z333;Q7Z333-3;Q7Z333-4	22.8274	23.3266	22.4204	25.8526	25.6569	25.7554	31.6141	30.7914	31.3291	21.5228	22.4958	21.1172	26.3602	25.4071
tr|F5H148|F5H148_HUMAN RNA polymerase I-specific transcription initiation factor RRN3 OS=Homo sapiens OX=9606 GN=RRN3 PE=1 SV=1;tr|H3BMT1|H3BMT1_HUMAN RNA polymerase I-specific transcription initiation factor RRN3 OS=Homo sapiens OX=9606 GN=RRN3 PE=1 SV=1;	RNA polymerase I-specific transcription initiation factor RRN3	RRN3		NaN	1	0			NaN	1	0			0.670303	0.277813	-1.06487		+	1.1319	0.0108888	1.44308	+	5	5	5	12.1	12.1	12.1	70.466	0	8.572	300690000	5	F5H148;H3BMT1;Q9NYV6;Q9NYV6-4;Q9NYV6-3;Q9NYV6-2	F5H148;H3BMT1;Q9NYV6;Q9NYV6-4;Q9NYV6-3	22.0934	21.7529	21.8327	20.6979	21.6311	22.8619	21.758	21.8757	21.8524	23.1838	21.8551	23.5984	22.5913	21.9514
sp|P00352|AL1A1_HUMAN Retinal dehydrogenase 1 OS=Homo sapiens OX=9606 GN=ALDH1A1 PE=1 SV=2	Retinal dehydrogenase 1	ALDH1A1		NaN	1	0		+	5.00412	0	5.42519	+		NaN	1	0			NaN	1	0		12	12	12	33.5	33.5	33.5	54.861	0	118.48	890100000	40	P00352;Q5SYQ9;Q5SYQ8;Q5SYQ7	P00352	21.7819	22.3079	21.7169	22.1037	21.9892	21.6396	27.2573	27.3833	27.4417	23.2168	21.6865	22.1946	23.5025	22.4838
tr|S5FZ81|S5FZ81_HUMAN PHD finger protein 10 OS=Homo sapiens OX=9606 GN=PHF10 PE=1 SV=1;sp|Q8WUB8-3|PHF10_HUMAN Isoform 3 of PHD finger protein 10 OS=Homo sapiens OX=9606 GN=PHF10;sp|Q8WUB8-2|PHF10_HUMAN Isoform 2 of PHD finger protein 10 OS=Homo sapiens O	PHD finger protein 10	PHF10	+	1.86077	0.0165909	2.87813	+	+	2.03279	0.00231738	3.42373	+		NaN	1	0		+	2.22764	0.000506002	2.78891	+	5	5	5	18	18	18	42.612	0	54.403	581520000	21	S5FZ81;Q8WUB8-3;Q8WUB8-2;Q8WUB8	S5FZ81;Q8WUB8-3;Q8WUB8-2;Q8WUB8	21.113	21.2722	23.2251	24.8798	24.5502	24.8147	24.771	25.5607	25.5498	21.1984	22.7884	21.6124	22.8454	22.3048
sp|Q9ULX9|MAFF_HUMAN Transcription factor MafF OS=Homo sapiens OX=9606 GN=MAFF PE=1 SV=2;sp|Q9ULX9-2|MAFF_HUMAN Isoform 2 of Transcription factor MafF OS=Homo sapiens OX=9606 GN=MAFF;tr|B0QY70|B0QY70_HUMAN Transcription factor MafF (Fragment) OS=Homo sapie	Transcription factor MafF	MAFF	+	4.5997	0	2.83618	+	+	5.60387	0	4.6344	+		1.12484	0.0925402	1.75601		+	2.97094	0	3.69262	+	6	5	5	51.2	47	47	17.76	0	25.297	1049200000	42	Q9ULX9;Q9ULX9-2;B0QY70;B0QY71	Q9ULX9;Q9ULX9-2;B0QY70;B0QY71	21.9991	21.6413	21.7507	24.5165	24.7684	24.6148	26.3444	26.5228	26.4271	22.1764	21.6739	20.7847	24.2447	22.1566
sp|Q8TAX0|OSR1_HUMAN Protein odd-skipped-related 1 OS=Homo sapiens OX=9606 GN=OSR1 PE=2 SV=1	Protein odd-skipped-related 1	OSR1		0.439937	0.366302	0.984081		+	3.59335	0.000895833	5.4119	+		NaN	1	0			NaN	1	0		6	6	6	39.1	39.1	39.1	29.611	0	82.283	783330000	31	Q8TAX0;E5RH47;E5RGY8;E5RH04;Q8N2R0-2;Q8N2R0;Q8N2R0-3	Q8TAX0	21.6218	22.46	21.0039	24.1662	21.1804	22.6914	27.3424	27.0894	26.8896	22.5649	21.6954	21.0463	21.5383	22.0561
sp|O43395|PRPF3_HUMAN U4/U6 small nuclear ribonucleoprotein Prp3 OS=Homo sapiens OX=9606 GN=PRPF3 PE=1 SV=2	U4/U6 small nuclear ribonucleoprotein Prp3	PRPF3	+	2.48434	0.00515493	2.81485	+	+	2.63147	0.00142761	2.98264	+		0.943501	0.122697	2.8484		+	2.9639	0	5.79289	+	21	21	21	43	43	43	77.528	0	131.45	5633200000	76	O43395;O43395-3	O43395	23.5045	22.1593	23.2512	25.5284	25.7122	26.1189	26.0567	25.6917	26.1145	23.4748	21.4018	23.4423	26.8363	26.8756
sp|Q12906-7|ILF3_HUMAN Isoform 7 of Interleukin enhancer-binding factor 3 OS=Homo sapiens OX=9606 GN=ILF3;sp|Q12906|ILF3_HUMAN Interleukin enhancer-binding factor 3 OS=Homo sapiens OX=9606 GN=ILF3 PE=1 SV=3;sp|Q12906-3|ILF3_HUMAN Isoform 3 of Interleukin e	Interleukin enhancer-binding factor 3	ILF3	+	2.52724	0.00495307	2.80602	+	+	2.9265	0.00107884	3.65164	+	+	1.62468	0.0356364	3.45149	+	+	2.25469	0.000396226	2.90101	+	21	21	17	28	28	21.7	95.807	0	148.14	4260000000	128	Q12906-7;Q12906;Q12906-3;Q12906-6;Q12906-2;Q12906-4;Q12906-5;K7EKJ9;K7ER69;K7EM82;K7EKY0;K7ERM6;K7ENK6;K7EJ09;Q96SI9-2;Q96SI9;K7EPG3;K7ELV3;K7EQ75	Q12906-7;Q12906;Q12906-3;Q12906-6;Q12906-2;Q12906-4;Q12906-5	24.3474	23.3911	24.5944	27.381	26.6404	26.7295	28.2252	27.6901	27.3726	23.9266	23.2223	24.9076	28.2295	28.3876
tr|F5H6I7|F5H6I7_HUMAN Atlastin-3 OS=Homo sapiens OX=9606 GN=ATL3 PE=1 SV=1		ATL3		NaN	1	0			NaN	1	0			0.494908	0.593876	-0.206334			0.316192	0.757877	0.0959848		29	1	1	62.3	3.1	3.1	58.772	0	73.272	1024400000	22	F5H6I7	F5H6I7	22.3332	21.7682	21.8444	21.6889	22.275	21.8783	21.744	21.6985	22.3115	25.606	25.4943	25.3182	25.2461	24.9977
sp|Q9Y3A2|UTP11_HUMAN Probable U3 small nucleolar RNA-associated protein 11 OS=Homo sapiens OX=9606 GN=UTP11 PE=1 SV=2;sp|Q9Y3A2-2|UTP11_HUMAN Isoform 2 of Probable U3 small nucleolar RNA-associated protein 11 OS=Homo sapiens OX=9606 GN=UTP11	Probable U3 small nucleolar RNA-associated protein 11	UTP11L	+	1.28218	0.0382072	2.80166	+	+	2.02119	0.00214334	4.51251	+	+	1.67454	0.0357161	2.47488	+	+	4.222	0	7.67991	+	16	16	16	50.2	50.2	50.2	30.446	0	199.77	10564000000	97	Q9Y3A2;Q9Y3A2-2	Q9Y3A2;Q9Y3A2-2	22.3079	25.0641	22.0931	26.3523	26.2951	25.2226	27.6779	27.9011	27.4237	20.9917	22.3711	22.0156	25.2285	24.1744
sp|Q96RE7|NACC1_HUMAN Nucleus accumbens-associated protein 1 OS=Homo sapiens OX=9606 GN=NACC1 PE=1 SV=1	Nucleus accumbens-associated protein 1	NACC1	+	2.66435	0.00456917	2.79513	+	+	3.21474	0.00120646	4.03067	+		0.797167	0.209878	1.40348		+	3.78197	0	3.23334	+	6	6	5	14.8	14.8	14.8	57.258	0	29.425	762680000	23	Q96RE7;K7ELC5	Q96RE7	22.3704	21.1989	21.221	24.5791	24.2954	24.3012	25.3807	25.8682	25.6334	22.1951	21.7479	21.6663	24.0645	24.0752
sp|Q99460|PSMD1_HUMAN 26S proteasome non-ATPase regulatory subunit 1 OS=Homo sapiens OX=9606 GN=PSMD1 PE=1 SV=2;tr|A0A087WW66|A0A087WW66_HUMAN 26S proteasome non-ATPase regulatory subunit 1 OS=Homo sapiens OX=9606 GN=PSMD1 PE=1 SV=1;sp|Q99460-2|PSMD1_HUMAN	26S proteasome non-ATPase regulatory subunit 1	PSMD1		1.24438	0.0565704	-1.16716		+	5.2281	0	5.39292	+	+	1.83498	0.0385814	-1.13707			0.776284	0.0568435	-0.747473		36	36	36	53.4	53.4	53.4	105.84	0	323.31	11413000000	353	Q99460;A0A087WW66;Q99460-2;C9J9M4;H7BZR6;H7C378;F8WCE3	Q99460;A0A087WW66;Q99460-2	23.7176	23.3957	23.9212	22.9722	21.687	22.8738	29.0202	28.975	29.2181	29.2481	29.0014	29.2821	28.5484	27.8926
sp|O60675|MAFK_HUMAN Transcription factor MafK OS=Homo sapiens OX=9606 GN=MAFK PE=1 SV=1	Transcription factor MafK	MAFK	+	3.80462	0.000727273	2.77406	+	+	4.64975	0	4.46359	+	+	1.88188	0.0193778	3.08757	+	+	3.65102	0	5.87133	+	11	11	7	62.8	62.8	51.3	17.523	0	66.031	3789200000	49	O60675	O60675	21.8628	21.3016	21.6115	24.5972	24.2809	24.2199	26.2119	26.1147	25.84	22.9036	21.3509	21.9394	26.1147	25.1923
sp|Q96J01|THOC3_HUMAN THO complex subunit 3 OS=Homo sapiens OX=9606 GN=THOC3 PE=1 SV=1;tr|D6REC9|D6REC9_HUMAN THO complex subunit 3 OS=Homo sapiens OX=9606 GN=THOC3 PE=1 SV=1	THO complex subunit 3	THOC3	+	2.52674	0.00522857	2.74426	+	+	3.64812	0.00106849	3.48433	+	+	1.55235	0.0409282	2.49972	+	+	4.17072	0	2.6691	+	5	5	5	19.7	19.7	19.7	38.771	0	18.19	932740000	26	Q96J01;D6REC9;D6RGZ2;Q96J01-2	Q96J01;D6REC9	22.4963	22.0171	21.782	25.4039	24.9796	24.1447	25.7547	25.7669	25.2269	22.0904	22.4439	22.5126	25.7476	25.3956
sp|Q14676-2|MDC1_HUMAN Isoform 2 of Mediator of DNA damage checkpoint protein 1 OS=Homo sapiens OX=9606 GN=MDC1;sp|Q14676|MDC1_HUMAN Mediator of DNA damage checkpoint protein 1 OS=Homo sapiens OX=9606 GN=MDC1 PE=1 SV=3;sp|Q14676-3|MDC1_HUMAN Isoform 3 of M	Mediator of DNA damage checkpoint protein 1	MDC1	+	3.15491	0.0032	2.74084	+	+	3.369	0.00128926	2.55177	+	+	1.39996	0.0490532	3.14806	+	+	3.62471	0	4.42859	+	12	12	12	13.3	13.3	13.3	197.6	0	139.67	1683200000	41	Q14676-2;Q14676;Q14676-3;Q14676-4;A2AB05;H0Y6Z8	Q14676-2;Q14676;Q14676-3	23.2125	22.6577	22.6666	25.9978	25.224	25.5375	25.2813	25.2134	25.6974	22.5872	21.9751	21.3692	26.0738	26.1511
tr|A0A0A0MTB8|A0A0A0MTB8_HUMAN WD repeat-containing protein 36 OS=Homo sapiens OX=9606 GN=WDR36 PE=1 SV=1;sp|Q8NI36|WDR36_HUMAN WD repeat-containing protein 36 OS=Homo sapiens OX=9606 GN=WDR36 PE=1 SV=1	WD repeat-containing protein 36	WDR36		0.655588	0.203067	1.36182		+	4.65203	0	5.3683	+		0.590669	0.518678	-0.237554			0.217487	0.822789	0.0855223		22	22	22	38.2	38.2	38.2	99.365	0	172.95	3058300000	133	A0A0A0MTB8;Q8NI36	A0A0A0MTB8;Q8NI36	21.5096	22.2398	21.6167	21.7071	24.8381	22.9064	27.0903	27.0963	27.2845	27.1479	26.6701	26.7539	26.7239	26.414
tr|H0YIQ8|H0YIQ8_HUMAN KAT8 regulatory NSL complex subunit 2 (Fragment) OS=Homo sapiens OX=9606 GN=KANSL2 PE=1 SV=1;tr|F8VXI8|F8VXI8_HUMAN KAT8 regulatory NSL complex subunit 2 OS=Homo sapiens OX=9606 GN=KANSL2 PE=1 SV=1;tr|F8VX10|F8VX10_HUMAN KAT8 regulat	KAT8 regulatory NSL complex subunit 2	KANSL2	+	2.42924	0.00568276	2.70727	+	+	3.08773	0.00122449	3.875	+		0.865839	0.178266	1.3959		+	2.80504	0	2.57232	+	9	9	9	29.7	29.7	29.7	38.441	0	36.411	962380000	33	H0YIQ8;F8VXI8;F8VX10;Q9H9L4;H0YID1;F8VUX5;Q9H9L4-4;H0YHR2	H0YIQ8;F8VXI8;F8VX10;Q9H9L4	22.4459	22.7468	21.3453	25.1439	24.7041	24.8119	25.9974	26.0949	26.0708	22.9792	21.8978	22.5125	24.5579	24.523
sp|Q96JP5|ZFP91_HUMAN E3 ubiquitin-protein ligase ZFP91 OS=Homo sapiens OX=9606 GN=ZFP91 PE=1 SV=1;tr|A0A0A6YYC7|A0A0A6YYC7_HUMAN HCG2042749, isoform CRA_d OS=Homo sapiens OX=9606 GN=ZFP91-CNTF PE=4 SV=1;sp|Q96JP5-2|ZFP91_HUMAN Isoform 2 of E3 ubiquitin-pr	E3 ubiquitin-protein ligase ZFP91	ZFP91;ZFP91-CNTF	+	1.82017	0.0200111	2.70451	+	+	0.823003	0.0494736	1.08938	+	+	3.68676	0.0164848	1.76442	+	+	4.65832	0	3.63892	+	7	7	7	17.2	17.2	17.2	63.444	0	75.308	1712900000	38	Q96JP5;A0A0A6YYC7;Q96JP5-2;H3BTR0;H0YCH4;Q9BU19-3;Q9BU19-2;Q9BU19;Q9BU19-5	Q96JP5;A0A0A6YYC7;Q96JP5-2	22.8636	24.458	24.8366	26.814	26.2587	27.199	25.2077	25.2785	24.9402	23.2863	22.8681	22.9827	24.761	24.7494
tr|F8VV56|F8VV56_HUMAN CD63 antigen OS=Homo sapiens OX=9606 GN=CD63 PE=1 SV=1;tr|F8W022|F8W022_HUMAN Tetraspanin (Fragment) OS=Homo sapiens OX=9606 GN=CD63 PE=1 SV=1;tr|F8VWK8|F8VWK8_HUMAN Tetraspanin (Fragment) OS=Homo sapiens OX=9606 GN=CD63 PE=1 SV=1;sp	Tetraspanin;CD63 antigen	CD63		NaN	1	0			NaN	1	0			0.182478	0.822463	0.148482		+	2.50486	0.000342738	-2.46053		2	2	2	22.1	22.1	22.1	16.021	0	19.865	545650000	16	F8VV56;F8W022;F8VWK8;P08962-3;P08962-2;P08962;F8VNT9	F8VV56;F8W022;F8VWK8;P08962-3;P08962-2;P08962;F8VNT9	22.4125	21.6429	22.62	22.7234	21.5105	21.8559	21.2327	22.9854	23.0006	24.7885	24.357	25.324	24.7929	24.8889
sp|O43390|HNRPR_HUMAN Heterogeneous nuclear ribonucleoprotein R OS=Homo sapiens OX=9606 GN=HNRNPR PE=1 SV=1;sp|O43390-2|HNRPR_HUMAN Isoform 2 of Heterogeneous nuclear ribonucleoprotein R OS=Homo sapiens OX=9606 GN=HNRNPR;sp|O43390-3|HNRPR_HUMAN Isoform 3 o	Heterogeneous nuclear ribonucleoprotein R	HNRNPR	+	2.53918	0.00491756	2.68957	+	+	3.27565	0.0012601	2.84363	+	+	1.83372	0.0232636	3.24652	+	+	3.63604	0	3.3499	+	20	20	13	34.9	34.9	26.9	70.942	0	149.9	5404200000	160	O43390;O43390-2;O43390-3;O43390-4;B4DT28;A0A286YEZ8	O43390;O43390-2;O43390-3;O43390-4;B4DT28	25.8722	25.1436	25.2148	28.5896	28.2699	27.4398	28.314	27.9567	28.4908	24.4328	23.7953	24.6545	28.4052	28.1607
sp|Q9H9B1|EHMT1_HUMAN Histone-lysine N-methyltransferase EHMT1 OS=Homo sapiens OX=9606 GN=EHMT1 PE=1 SV=4;tr|A0A1B0GV09|A0A1B0GV09_HUMAN Histone-lysine N-methyltransferase EHMT1 OS=Homo sapiens OX=9606 GN=EHMT1 PE=1 SV=1;sp|Q9H9B1-3|EHMT1_HUMAN Isoform 3 o	Histone-lysine N-methyltransferase EHMT1	EHMT1	+	1.59123	0.0255648	2.68193	+	+	2.64755	0.00119264	4.66593	+		0.335341	0.57856	1.13645		+	2.4128	0.000328657	2.55781	+	14	14	13	18.3	18.3	17.6	141.46	0	54.686	1418300000	46	Q9H9B1;A0A1B0GV09;Q9H9B1-3;A0A1B0GU48;A0A0C4DGF8;Q9H9B1-4;A0A1B0GWF6;A0A0D9SFX4;A0A1B0GW79;A0A1W2PPZ7;A0A1B0GVZ8;A0A1B0GUD1;A0A0D9SEQ1;A0A0D9SF38;A0A1B0GV89;A0A0D9SFG7;A0A0D9SER3;A0A0D9SFS4;A0A0D9SEP2	Q9H9B1;A0A1B0GV09;Q9H9B1-3;A0A1B0GU48;A0A0C4DGF8;Q9H9B1-4	21.3305	21.6725	23.4491	25.6471	24.4809	24.37	27.0825	26.6102	26.7572	22.2975	23.6565	22.6346	25.6047	25.0496
sp|Q15326-6|ZMY11_HUMAN Isoform 6 of Zinc finger MYND domain-containing protein 11 OS=Homo sapiens OX=9606 GN=ZMYND11;sp|Q15326-3|ZMY11_HUMAN Isoform 3 of Zinc finger MYND domain-containing protein 11 OS=Homo sapiens OX=9606 GN=ZMYND11;sp|Q15326|ZMY11_HUMA	Zinc finger MYND domain-containing protein 11	ZMYND11	+	2.59926	0.0042974	2.66538	+	+	2.41511	0.00151596	3.50558	+	+	2.32645	0.0148197	3.51781	+	+	3.81024	0	4.31671	+	14	14	14	34.7	34.7	34.7	66.518	0	125.35	4047700000	120	Q15326-6;Q15326-3;Q15326;B7Z2J6;E7ENI9;Q15326-4;Q15326-2;J3QKD2;Q15326-5;B0QZE2;A0A0A0MRY2;E7EV75;E9PE09	Q15326-6;Q15326-3;Q15326;B7Z2J6;E7ENI9;Q15326-4;Q15326-2;J3QKD2;Q15326-5;B0QZE2;A0A0A0MRY2	24.3799	24.3389	24.7054	27.6101	27.4172	26.393	27.4916	27.3307	29.1186	22.4405	23.004	22.9849	27.4677	26.0221
tr|F8W126|F8W126_HUMAN Microspherule protein 1 (Fragment) OS=Homo sapiens OX=9606 GN=MCRS1 PE=1 SV=1;sp|Q96EZ8-3|MCRS1_HUMAN Isoform 3 of Microspherule protein 1 OS=Homo sapiens OX=9606 GN=MCRS1;sp|Q96EZ8|MCRS1_HUMAN Microspherule protein 1 OS=Homo sapiens	Microspherule protein 1	MCRS1		NaN	1	0			NaN	1	0			NaN	1	0		+	4.06783	0	5.29712	+	7	7	7	38.1	38.1	38.1	35.683	0	57.251	1166500000	15	F8W126;Q96EZ8-3;Q96EZ8;Q96EZ8-2;Q96EZ8-4;F8VP44;F8W0I9;F8VVA6;H0YIA0	F8W126;Q96EZ8-3;Q96EZ8;Q96EZ8-2;Q96EZ8-4	21.2104	22.2602	23.1891	22.7898	21.1745	22.4121	22.8622	22.3252	22.6766	21.6487	21.1492	20.5797	21.8277	21.8169
tr|F8W6I7|F8W6I7_HUMAN Helix-destabilizing protein OS=Homo sapiens OX=9606 GN=HNRNPA1 PE=1 SV=2;sp|P09651-3|ROA1_HUMAN Isoform 2 of Heterogeneous nuclear ribonucleoprotein A1 OS=Homo sapiens OX=9606 GN=HNRNPA1;sp|P09651-2|ROA1_HUMAN Isoform A1-A of Heterog	Heterogeneous nuclear ribonucleoprotein A1;Heterogeneous nuclear ribonucleoprotein A1, N-terminally processed;Heterogeneous nuclear ribonucleoprotein A1-like 2	HNRNPA1;HNRNPA1L2		1.53544	0.0607259	0.582835			0.367887	0.579237	-0.190711			0.974776	0.134161	1.42569		+	1.23047	0.00786331	1.57599	+	8	8	8	41	41	41	33.155	0	30.62	879450000	39	F8W6I7;P09651-3;P09651-2;P09651;F8VTQ5;F8VZ49;A0A2R8Y4L2;Q32P51;H0YH80;F8VYN5;F8W646	F8W6I7;P09651-3;P09651-2;P09651;F8VTQ5;F8VZ49;A0A2R8Y4L2;Q32P51;H0YH80	24.8751	24.9241	25.2508	25.7475	25.7094	25.3415	24.9623	25.0499	24.4657	22.3247	24.2107	24.0062	25.5378	24.9039
tr|F8W726|F8W726_HUMAN Ubiquitin-associated protein 2-like OS=Homo sapiens OX=9606 GN=UBAP2L PE=1 SV=2;sp|Q14157-4|UBP2L_HUMAN Isoform 4 of Ubiquitin-associated protein 2-like OS=Homo sapiens OX=9606 GN=UBAP2L;sp|Q14157-1|UBP2L_HUMAN Isoform 2 of Ubiquitin	Ubiquitin-associated protein 2-like	UBAP2L	+	1.33112	0.0366681	-2.34052		+	3.28163	0.00121306	-2.57488			0.932508	0.219517	-0.60905			0.642526	0.0909911	-0.769552		4	4	4	5.4	5.4	5.4	113.63	0	5.5047	92800000	15	F8W726;Q14157-4;Q14157-1;Q14157-3;Q14157;Q14157-5;Q5VU77;Q5VU81;Q5VU80;Q5VU79;Q5VU78	F8W726;Q14157-4;Q14157-1;Q14157-3;Q14157;Q14157-5;Q5VU77	24.482	24.6301	24.755	23.8559	21.8875	21.1021	21.644	22.4747	22.0237	23.719	23.0619	23.4603	22.8648	22.3655
sp|Q9H040|SPRTN_HUMAN SprT-like domain-containing protein Spartan OS=Homo sapiens OX=9606 GN=SPRTN PE=1 SV=2	SprT-like domain-containing protein Spartan	SPRTN	+	2.05381	0.0111006	2.66514	+	+	5.02738	0	7.12474	+		0.0315938	0.969052	-0.025423		+	4.92003	0	7.18418	+	19	19	19	54	54	54	55.133	0	323.31	11114000000	195	Q9H040;B1AKT1;Q9H040-2;Q9H040-3	Q9H040	21.8726	21.8535	22.617	25.7762	24.3197	24.2425	29.1926	29.2523	29.2724	22.2818	21.9423	21.997	22.5481	21.7875
sp|Q13547|HDAC1_HUMAN Histone deacetylase 1 OS=Homo sapiens OX=9606 GN=HDAC1 PE=1 SV=1;tr|Q5TEE2|Q5TEE2_HUMAN Histone deacetylase (Fragment) OS=Homo sapiens OX=9606 GN=HDAC1 PE=1 SV=1	Histone deacetylase 1	HDAC1	+	1.82375	0.0200667	2.66171	+	+	2.82258	0.00111748	6.29112	+		0.791567	0.194785	2.13267		+	2.69695	0	6.60714	+	14	14	7	48.3	48.3	28.2	55.102	0	323.31	9279700000	118	Q13547;Q5TEE2;H3BM24;E5RFI6;E5RJ04;E5RGV4;E5RHE7;E5RH52;E5RG37;E5RFP9;E5RK19;E7ESJ6	Q13547;Q5TEE2	20.942	22.9964	22.5295	25.1625	24.4933	24.7972	27.7857	28.073	29.4825	20.6973	23.5007	23.4103	25.6767	25.3234
sp|P40227|TCPZ_HUMAN T-complex protein 1 subunit zeta OS=Homo sapiens OX=9606 GN=CCT6A PE=1 SV=3;sp|P40227-2|TCPZ_HUMAN Isoform 2 of T-complex protein 1 subunit zeta OS=Homo sapiens OX=9606 GN=CCT6A	T-complex protein 1 subunit zeta	CCT6A	+	2.61264	0.00436226	2.64888	+	+	3.62659	0.00111695	3.99029	+		0.874228	0.145539	3.18834		+	3.44649	0	5.92476	+	17	17	13	39.7	39.7	32.6	58.024	0	285.65	4869000000	105	P40227;P40227-2;J3KRI6	P40227;P40227-2	22.3311	21.7836	22.8593	25.284	25.1238	24.5129	26.4588	26.2069	26.2792	21.4166	23.0779	22.3655	27.3103	26.8868
sp|Q8TF20-2|ZN721_HUMAN Isoform 2 of Zinc finger protein 721 OS=Homo sapiens OX=9606 GN=ZNF721;sp|Q8TF20|ZN721_HUMAN Zinc finger protein 721 OS=Homo sapiens OX=9606 GN=ZNF721 PE=1 SV=2	Zinc finger protein 721	ZNF721	+	1.2818	0.0382463	2.64354	+	+	1.15383	0.0129512	2.29987	+		1.07854	0.096245	2.04756		+	3.23506	0	3.03272	+	10	9	7	18.9	17.9	13	106.49	0	15.629	1022500000	30	Q8TF20-2;Q8TF20	Q8TF20-2;Q8TF20	24.9128	22.9782	21.7027	26.3495	25.5772	25.5976	25.4452	25.378	25.6702	22.4344	21.7375	22.4132	25.017	25.1905
tr|F8W930|F8W930_HUMAN Insulin-like growth factor 2 mRNA-binding protein 2 OS=Homo sapiens OX=9606 GN=IGF2BP2 PE=1 SV=1;sp|Q9Y6M1-1|IF2B2_HUMAN Isoform 2 of Insulin-like growth factor 2 mRNA-binding protein 2 OS=Homo sapiens OX=9606 GN=IGF2BP2;sp|Q9Y6M1|IF	Insulin-like growth factor 2 mRNA-binding protein 2	IGF2BP2		0.431228	0.515104	-0.295088		+	1.13898	0.0239239	-0.767176			0.0332036	0.961773	-0.0473995		+	2.01678	0.00667968	-0.470823		16	16	15	32.1	32.1	29.9	66.785	0	79.416	2332300000	119	F8W930;Q9Y6M1-1;Q9Y6M1;Q9Y6M1-5;Q9Y6M1-6;Q9Y6M1-3;Q9Y6M1-4;Q9NZI8-2;Q9NZI8	F8W930;Q9Y6M1-1;Q9Y6M1;Q9Y6M1-5;Q9Y6M1-6;Q9Y6M1-3;Q9Y6M1-4	26.7806	26.3946	27.3551	26.3713	26.6316	26.6421	26.2583	26.1916	25.7788	26.6657	26.4358	26.7551	26.0074	26.1969
sp|P24278|ZBT25_HUMAN Zinc finger and BTB domain-containing protein 25 OS=Homo sapiens OX=9606 GN=ZBTB25 PE=1 SV=2	Zinc finger and BTB domain-containing protein 25	ZBTB25	+	1.15506	0.0498462	2.63535	+	+	4.07057	0.000563877	5.74738	+	+	2.41724	0.0139469	2.92116	+	+	2.79262	0	4.11027	+	12	12	12	43.7	43.7	43.7	48.99	0	72.904	2061400000	38	P24278;G3V351;G3V2K3	P24278	20.7921	21.7835	21.3069	25.3524	24.5177	21.9184	26.9732	26.7174	27.434	21.6714	21.5281	22.8451	25.3597	24.945
sp|P28698|MZF1_HUMAN Myeloid zinc finger 1 OS=Homo sapiens OX=9606 GN=MZF1 PE=1 SV=3;sp|P28698-2|MZF1_HUMAN Isoform MZF1B-C of Myeloid zinc finger 1 OS=Homo sapiens OX=9606 GN=MZF1	Myeloid zinc finger 1	MZF1	+	1.74433	0.0211148	2.61876	+	+	1.7543	0.00396491	2.61446	+	+	1.56817	0.0363323	3.10901	+	+	3.98995	0	3.22785	+	12	12	12	25.5	25.5	25.5	82.054	0	40.533	1603000000	44	P28698;P28698-2;M0R1U5;P28698-3	P28698;P28698-2	22.9319	24.9333	24.9531	26.9472	26.709	27.0185	26.8719	26.946	26.8439	21.9451	22.0967	21.5316	26.3756	25.2215
tr|Q8NEC6|Q8NEC6_HUMAN MTMR1 protein OS=Homo sapiens OX=9606 GN=MTMR1 PE=1 SV=1;tr|F8WA39|F8WA39_HUMAN Phosphatidylinositol-3,5-bisphosphate 3-phosphatase OS=Homo sapiens OX=9606 GN=MTMR1 PE=1 SV=1;sp|Q13613-2|MTMR1_HUMAN Isoform 1A of Myotubularin-related	Myotubularin-related protein 1	MTMR1		NaN	1	0			NaN	1	0			0.30229	0.711444	-0.206191		+	0.780728	0.0382964	-1.41477		4	4	4	12.9	12.9	12.9	39.822	0	6.3335	198510000	8	Q8NEC6;F8WA39;Q13613-2;Q13613;H7BZJ1;E9PIH9;H7C406;E9PPP8;H0YDX3;F8W764;F8W8S8	Q8NEC6;F8WA39;Q13613-2;Q13613;H7BZJ1;E9PIH9;H7C406;E9PPP8;H0YDX3;F8W764;F8W8S8	22.2356	22.5221	22.9307	22.0559	21.8645	22.1041	22.7923	22.2744	21.4695	23.5519	23.7911	23.5198	23.7389	22.8921
tr|F8WBW8|F8WBW8_HUMAN BAH and coiled-coil domain-containing protein 1 OS=Homo sapiens OX=9606 GN=BAHCC1 PE=1 SV=2;sp|Q9P281|BAHC1_HUMAN BAH and coiled-coil domain-containing protein 1 OS=Homo sapiens OX=9606 GN=BAHCC1 PE=1 SV=4	BAH and coiled-coil domain-containing protein 1	BAHCC1		NaN	1	0			NaN	1	0			NaN	1	0		+	1.44105	0.00599255	1.1075	+	5	4	4	3.3	3	3	276.9	0	7.477	211570000	5	F8WBW8;Q9P281	F8WBW8;Q9P281	20.981	21.5763	21.4182	21.6251	21.8236	21.5947	22.9158	21.8585	23.0566	22.4048	23.4411	22.5048	22.6389	21.9231
tr|B7WPG3|B7WPG3_HUMAN Heterogeneous nuclear ribonucleoprotein L-like OS=Homo sapiens OX=9606 GN=HNRNPLL PE=1 SV=1;tr|C9IYN3|C9IYN3_HUMAN Heterogeneous nuclear ribonucleoprotein L-like OS=Homo sapiens OX=9606 GN=HNRNPLL PE=1 SV=2;tr|V9GYK2|V9GYK2_HUMAN Het	Heterogeneous nuclear ribonucleoprotein L-like	HNRNPLL	+	3.26429	0.00276243	2.60863	+	+	3.93337	0.000744479	4.26127	+		1.10493	0.0939492	1.93224		+	4.3902	0	3.62582	+	11	10	10	33.9	32.5	32.5	56.45	0	52.339	1586100000	50	B7WPG3;C9IYN3;V9GYK2;Q8WVV9-5;Q8WVV9-4;Q8WVV9;H7C464;C9JJZ7;H7BXH8;Q8WVV9-3;Q8WVV9-2	B7WPG3;C9IYN3;V9GYK2;Q8WVV9-5;Q8WVV9-4;Q8WVV9	22.3801	22.3129	21.59	24.6641	24.6344	24.8104	26.178	26.2766	26.6122	22.3285	22.4203	22.2558	25.2431	24.9225
tr|G1UD79|G1UD79_HUMAN Protein FAM122B OS=Homo sapiens OX=9606 GN=FAM122B PE=1 SV=1;sp|Q7Z309-4|F122B_HUMAN Isoform 4 of Protein FAM122B OS=Homo sapiens OX=9606 GN=FAM122B;sp|Q7Z309-3|F122B_HUMAN Isoform 3 of Protein FAM122B OS=Homo sapiens OX=9606 GN=FAM1	Protein FAM122B	SPACIA2;FAM122B		NaN	1	0			NaN	1	0			NaN	1	0		+	3.71241	0	4.23821	+	3	3	3	21	21	21	29.186	0	37.185	565880000	10	G1UD79;Q7Z309-4;Q7Z309-3;Q7Z309;Q7Z309-2	G1UD79;Q7Z309-4;Q7Z309-3;Q7Z309;Q7Z309-2	21.0125	22.5045	21.0289	22.1614	21.3243	21.9524	21.0115	21.9526	22.1805	21.1542	21.7458	20.7313	22.5081	21.6304
sp|Q14692|BMS1_HUMAN Ribosome biogenesis protein BMS1 homolog OS=Homo sapiens OX=9606 GN=BMS1 PE=1 SV=1	Ribosome biogenesis protein BMS1 homolog	BMS1	+	1.90244	0.0166382	2.525	+	+	2.81489	0.00105691	4.49659	+	+	1.67838	0.0304	3.72369	+	+	4.04208	0	5.44381	+	24	24	24	29.9	29.9	29.9	145.81	0	203.09	5616300000	106	Q14692	Q14692	22.9828	22.8304	21.1709	24.9677	24.7039	24.8876	26.936	26.7054	26.8326	22.4256	23.4987	22.7921	27.5783	27.596
sp|Q14498-3|RBM39_HUMAN Isoform 3 of RNA-binding protein 39 OS=Homo sapiens OX=9606 GN=RBM39;sp|Q14498-2|RBM39_HUMAN Isoform 2 of RNA-binding protein 39 OS=Homo sapiens OX=9606 GN=RBM39;sp|Q14498|RBM39_HUMAN RNA-binding protein 39 OS=Homo sapiens OX=9606 G	RNA-binding protein 39	RBM39	+	2.73078	0.00460558	2.51173	+	+	5.28589	0	5.45379	+	+	1.98699	0.0185435	4.31452	+	+	4.61149	0	7.2961	+	18	18	16	45.1	45.1	40	57.089	0	296.67	6946800000	113	Q14498-3;Q14498-2;Q14498;G3XAC6;A0A0U1RQH7;H0Y4X3;A0A0U1RQW2;Q5QP23;Q5QP22;F8WF24;F2Z3E6;F2Z2Z5;F8WF73;A8MYG5;G3V5Z6;H0YJJ3	Q14498-3;Q14498-2;Q14498;G3XAC6;A0A0U1RQH7;H0Y4X3	22.1135	21.9504	21.8749	25.1609	24.2084	24.1047	27.7216	27.3668	27.2119	21.9271	21.1452	21.095	26.4461	26.764
sp|Q6NX49|ZN544_HUMAN Zinc finger protein 544 OS=Homo sapiens OX=9606 GN=ZNF544 PE=1 SV=1;tr|J3KQC8|J3KQC8_HUMAN Zinc finger protein 544 OS=Homo sapiens OX=9606 GN=ZNF544 PE=1 SV=1;tr|M0QY11|M0QY11_HUMAN Zinc finger protein 544 OS=Homo sapiens OX=9606 GN=Z	Zinc finger protein 544	ZNF544	+	2.12846	0.0103976	2.50246	+	+	4.15694	0.000666667	6.21772	+		0.599232	0.326124	1.01541		+	3.89193	0	4.50052	+	27	25	24	46.7	44.6	42.5	81.741	0	106.91	4303300000	102	Q6NX49;J3KQC8;M0QY11	Q6NX49;J3KQC8;M0QY11	22.1195	22.2563	23.2446	24.9564	25.6908	24.4806	28.7027	28.642	28.9289	22.5	21.8159	21.927	23.9224	21.6446
tr|G3V1M0|G3V1M0_HUMAN Zinc finger and SCAN domain-containing protein 21 OS=Homo sapiens OX=9606 GN=ZSCAN21 PE=1 SV=2;sp|Q9Y5A6|ZSC21_HUMAN Zinc finger and SCAN domain-containing protein 21 OS=Homo sapiens OX=9606 GN=ZSCAN21 PE=1 SV=2;tr|G3V0F4|G3V0F4_HUMA	Zinc finger and SCAN domain-containing protein 21	ZSCAN21		0.36837	0.486022	0.693438			0.631185	0.144781	-0.496335			0.566281	0.325971	1.6552			0.315164	0.704309	0.132408		18	17	17	46.3	44.7	44.7	49.338	0	86.941	3644700000	100	G3V1M0;Q9Y5A6;G3V0F4;C9JHD9	G3V1M0;Q9Y5A6;G3V0F4	25.468	24.9348	25.9664	26.9106	26.8463	24.6927	24.6206	24.9753	25.2843	26.174	26.0922	25.9984	29.1819	28.8948
sp|P23528|COF1_HUMAN Cofilin-1 OS=Homo sapiens OX=9606 GN=CFL1 PE=1 SV=3;tr|G3V1A4|G3V1A4_HUMAN Cofilin, non-muscle isoform OS=Homo sapiens OX=9606 GN=CFL1 PE=1 SV=1;tr|E9PP50|E9PP50_HUMAN Cofilin, non-muscle isoform (Fragment) OS=Homo sapiens OX=9606 GN=C	Cofilin-1	CFL1	+	1.21844	0.0443461	2.48401	+	+	1.60947	0.00419492	3.40706	+	+	1.38241	0.0513168	3.10588	+	+	3.5551	0	5.77479	+	9	9	9	57.8	57.8	57.8	18.502	0	130.75	4062000000	44	P23528;G3V1A4;E9PP50;E9PK25;E9PQB7;E9PLJ3;E9PS23;Q9Y281-3;Q9Y281	P23528;G3V1A4;E9PP50;E9PK25;E9PQB7;E9PLJ3;E9PS23	24.0482	21.3147	21.0882	24.8528	24.5768	24.4737	25.7262	25.7636	25.1826	21.6446	22.9277	21.7625	26.233	26.1314
sp|Q96AY2|EME1_HUMAN Crossover junction endonuclease EME1 OS=Homo sapiens OX=9606 GN=EME1 PE=1 SV=2;sp|Q96AY2-2|EME1_HUMAN Isoform 2 of Crossover junction endonuclease EME1 OS=Homo sapiens OX=9606 GN=EME1	Crossover junction endonuclease EME1	EME1	+	1.21963	0.0444355	2.47827	+	+	2.79763	0.00116644	4.39585	+		0.779575	0.191253	2.93271		+	4.97485	0	5.8157	+	14	14	14	25.1	25.1	25.1	63.251	0	98.794	3956400000	61	Q96AY2;Q96AY2-2;H0Y9Z4;F8W714	Q96AY2;Q96AY2-2	21.0008	22.9808	21.7935	24.8895	25.4108	22.9096	26.324	26.2436	26.3951	21.8521	22.2072	21.851	26.9207	26.3287
sp|Q96PC5|MIA2_HUMAN Melanoma inhibitory activity protein 2 OS=Homo sapiens OX=9606 GN=MIA2 PE=1 SV=4;sp|Q96PC5-10|MIA2_HUMAN Isoform 9 of Melanoma inhibitory activity protein 2 OS=Homo sapiens OX=9606 GN=MIA2;sp|Q96PC5-9|MIA2_HUMAN Isoform 8 of Melanoma i	Melanoma inhibitory activity protein 2	MIA2	+	1.48478	0.0307855	-2.41844			0.0563354	0.934688	-0.107135		+	1.76319	0.0466211	-1.02792		+	2.95609	0	-2.41084		20	20	20	17.7	17.7	17.7	159.83	0	126.49	1913600000	96	Q96PC5;Q96PC5-10;Q96PC5-9;Q96PC5-11;G3V599;Q96PC5-14;Q96PC5-7;Q96PC5-13;Q96PC5-12;Q96PC5-5;Q96PC5-8;Q96PC5-6;Q96RT6;A4FU28;A0A5F9ZHA4;A0A2R8YE69;Q8IX94;Q8IX95;G3V5K6;Q86UF2;A4D2H0;P0CG41;G3V3C4	Q96PC5;Q96PC5-10;Q96PC5-9;Q96PC5-11;G3V599;Q96PC5-14;Q96PC5-7;Q96PC5-13;Q96PC5-12;Q96PC5-5;Q96PC5-8;Q96PC5-6	25.1937	24.8501	26.0038	23.8113	23.3715	21.6096	25.7679	25.8372	24.1212	27.374	27.8237	27.8614	26.3603	26.5503
tr|G3V5E1|G3V5E1_HUMAN Cyclin-K OS=Homo sapiens OX=9606 GN=CCNK PE=1 SV=1;sp|O75909-1|CCNK_HUMAN Isoform 3 of Cyclin-K OS=Homo sapiens OX=9606 GN=CCNK;sp|O75909|CCNK_HUMAN Cyclin-K OS=Homo sapiens OX=9606 GN=CCNK PE=1 SV=2;sp|O75909-4|CCNK_HUMAN Isoform 4	Cyclin-K	CCNK		NaN	1	0			NaN	1	0			1.01766	0.26821	0.343339			0.214239	0.814001	-0.0987466		3	3	3	13	13	13	43.404	0	61.867	659100000	23	G3V5E1;O75909-1;O75909;O75909-4;G3V2Q3;O75909-2;G3V235	G3V5E1;O75909-1;O75909;O75909-4;G3V2Q3;O75909-2	21.7174	21.2186	21.7393	21.4503	21.8025	23.0143	22.4062	21.6758	21.5733	24.6449	25.0988	24.9516	25.0873	25.3799
tr|G3XAN4|G3XAN4_HUMAN Translocating chain-associated membrane protein 1 OS=Homo sapiens OX=9606 GN=TRAM1 PE=1 SV=1;sp|Q15629-2|TRAM1_HUMAN Isoform 2 of Translocating chain-associated membrane protein 1 OS=Homo sapiens OX=9606 GN=TRAM1;sp|Q15629|TRAM1_HUMA	Translocating chain-associated membrane protein 1	TRAM1		NaN	1	0			NaN	1	0			0.53141	0.467348	-0.401026		+	1.73176	0.00161504	-2.71665		4	4	4	15.6	15.6	15.6	33.435	0	32.448	468980000	28	G3XAN4;Q15629-2;Q15629	G3XAN4;Q15629-2;Q15629	21.5987	20.6669	21.0678	22.6326	21.5192	20.7703	22.7857	22.1822	23.2601	25.3204	25.6169	25.776	24.8844	24.8472
sp|Q9NSE4|SYIM_HUMAN Isoleucine--tRNA ligase, mitochondrial OS=Homo sapiens OX=9606 GN=IARS2 PE=1 SV=2	Isoleucine--tRNA ligase, mitochondrial	IARS2		0.65223	0.204409	-1.37105		+	2.66246	0.00110467	5.27778	+		1.09018	0.222636	-0.419144		+	2.63094	0.00102427	-0.911707		36	36	36	48.3	48.3	48.3	113.79	0	323.31	9890500000	333	Q9NSE4	Q9NSE4	22.0273	24.0947	24.4333	22.1792	23.1387	21.1243	28.7589	28.8477	28.782	29.0906	29.008	29.2501	28.9071	28.8152
tr|A0A2U3TZL8|A0A2U3TZL8_HUMAN Kinesin-like protein OS=Homo sapiens OX=9606 GN=KIF23 PE=1 SV=1;tr|H7BYN4|H7BYN4_HUMAN Kinesin-like protein OS=Homo sapiens OX=9606 GN=KIF23 PE=1 SV=1;sp|Q02241-2|KIF23_HUMAN Isoform 2 of Kinesin-like protein KIF23 OS=Homo sa	Kinesin-like protein;Kinesin-like protein KIF23	KIF23	+	2.17873	0.0106543	2.43469	+	+	2.97037	0.00114035	4.04298	+		0.721101	0.226396	2.52049		+	2.13053	0.000403071	5.90706	+	12	12	12	20.5	20.5	20.5	92.682	0	259.5	5292200000	85	A0A2U3TZL8;H7BYN4;Q02241-2;Q02241;Q02241-3;A0A2R8Y531;H0YME6;H0YMJ4	A0A2U3TZL8;H7BYN4;Q02241-2;Q02241;Q02241-3	22.6853	23.5682	21.955	25.1151	25.1038	25.2936	26.7275	26.9808	26.6291	24.9253	21.5542	21.3151	26.3004	26.1235
sp|Q14586|ZN267_HUMAN Zinc finger protein 267 OS=Homo sapiens OX=9606 GN=ZNF267 PE=1 SV=3	Zinc finger protein 267	ZNF267	+	2.72336	0.00449805	2.36206	+	+	3.02435	0.00121495	4.45376	+		0.91988	0.157733	1.39118		+	3.80798	0	3.11229	+	16	16	16	25.4	25.4	25.4	87.375	0	135.8	2635700000	74	Q14586;I3L4I6;H3BPW2	Q14586	23.7728	23.7842	22.8405	25.8005	25.9894	25.6938	27.1147	28.3056	28.3385	22.7265	22.4143	22.316	25.1949	22.833
sp|Q14966-3|ZN638_HUMAN Isoform 3 of Zinc finger protein 638 OS=Homo sapiens OX=9606 GN=ZNF638;sp|Q14966|ZN638_HUMAN Zinc finger protein 638 OS=Homo sapiens OX=9606 GN=ZNF638 PE=1 SV=2;sp|Q14966-4|ZN638_HUMAN Isoform 4 of Zinc finger protein 638 OS=Homo sa	Zinc finger protein 638	ZNF638	+	3.12553	0.00333649	2.3612	+	+	4.38039	0.000739812	2.56091	+	+	1.90704	0.020566	3.23568	+	+	4.8878	0	4.14672	+	13	13	5	8.8	8.8	3.8	218.24	0	26.345	1028900000	21	Q14966-3;Q14966;Q14966-4;Q14966-6;Q14966-5;A0A096LNR2;A0A096LNX0;A0A096LPI0;A0A096LNQ0;A0A096LPB4;C9JWN0;A0A096LPK8	Q14966-3;Q14966;Q14966-4;Q14966-6	22.4032	22.4394	22.7961	24.918	25.2854	24.5189	25.1207	25.0296	25.1711	21.6378	21.8127	21.3167	25.4661	25.647
tr|G8JLK1|G8JLK1_HUMAN USE1-like protein OS=Homo sapiens OX=9606 GN=USE1 PE=1 SV=2;sp|Q9NZ43|USE1_HUMAN Vesicle transport protein USE1 OS=Homo sapiens OX=9606 GN=USE1 PE=1 SV=2;tr|M0QZE0|M0QZE0_HUMAN USE1-like protein OS=Homo sapiens OX=9606 GN=USE1 PE=1 S	Vesicle transport protein USE1	USE1		0.594725	0.265146	-0.795568			NaN	1	0			0.331402	0.712896	-0.168292		+	1.24374	0.0118862	-0.823811		6	6	2	28.5	28.5	9.4	29.098	0	11.321	274640000	21	G8JLK1;Q9NZ43;M0QZE0;M0QYT5;Q9NZ43-2;M0QZZ6	G8JLK1;Q9NZ43;M0QZE0;M0QYT5;Q9NZ43-2	22.3349	23.8646	21.9429	21.6919	21.9715	22.0923	23.8455	23.2183	21.9402	23.8811	24.1799	24.3429	23.7458	24.2765
sp|O75643|U520_HUMAN U5 small nuclear ribonucleoprotein 200 kDa helicase OS=Homo sapiens OX=9606 GN=SNRNP200 PE=1 SV=2;tr|A0A494C1A5|A0A494C1A5_HUMAN U5 small nuclear ribonucleoprotein 200 kDa helicase (Fragment) OS=Homo sapiens OX=9606 GN=SNRNP200 PE=1 SV	U5 small nuclear ribonucleoprotein 200 kDa helicase	SNRNP200	+	1.22921	0.0445112	2.33111	+	+	2.24053	0.00153314	4.39909	+		0.670977	0.378197	0.397929		+	1.81301	0.0042523	0.748938	+	78	78	78	48.4	48.4	48.4	244.5	0	323.31	20579000000	601	O75643;A0A494C1A5;O75643-2	O75643;A0A494C1A5	23.6665	24.2058	26.3349	27.4981	27.3516	26.3508	29.2513	29.1054	29.0477	29.2972	28.9863	28.8416	29.6621	29.6832
tr|H0Y2V6|H0Y2V6_HUMAN Centrosomal protein of 170 kDa (Fragment) OS=Homo sapiens OX=9606 GN=CEP170 PE=1 SV=1;sp|Q5SW79|CE170_HUMAN Centrosomal protein of 170 kDa OS=Homo sapiens OX=9606 GN=CEP170 PE=1 SV=1;sp|Q5SW79-2|CE170_HUMAN Isoform 2 of Centrosomal p	Centrosomal protein of 170 kDa	CEP170		0.0983143	0.930248	-0.0412763		+	1.83698	0.00945477	-0.616011			0.0191593	0.975367	-0.043644			0.296812	0.474994	-0.814543		4	4	4	3.7	3.7	3.7	171.97	0	6.1274	255320000	21	H0Y2V6;Q5SW79;Q5SW79-2;Q5SW79-3;E5RGW7;E5RG47;H0Y4T4;E7EWM2;E7EMW0;Q96L14	H0Y2V6;Q5SW79;Q5SW79-2;Q5SW79-3	25.113	24.9481	25.4345	25.0356	25.1386	25.1977	24.5974	24.5882	24.462	22.9383	24.2741	22.8288	24.4814	22.5268
tr|H0Y2X5|H0Y2X5_HUMAN Aldehyde dehydrogenase 1 family, member A3, isoform CRA_b OS=Homo sapiens OX=9606 GN=ALDH1A3 PE=1 SV=1;sp|P47895|AL1A3_HUMAN Aldehyde dehydrogenase family 1 member A3 OS=Homo sapiens OX=9606 GN=ALDH1A3 PE=1 SV=2	Aldehyde dehydrogenase family 1 member A3	ALDH1A3		NaN	1	0			0.0286942	0.962924	-0.062205			NaN	1	0		+	2.64803	0.000246361	2.57375	+	3	3	3	9.9	9.9	9.9	44.256	0	11.003	353600000	6	H0Y2X5;P47895;H0YNQ3;H0YKF9	H0Y2X5;P47895	22.7744	22.5899	22.887	21.6833	22.7743	21.5972	24.0702	22.3681	21.6263	22.4909	21.8777	21.2189	21.543	21.8506
sp|Q8N2K0-2|ABD12_HUMAN Isoform 2 of Lysophosphatidylserine lipase ABHD12 OS=Homo sapiens OX=9606 GN=ABHD12;sp|Q8N2K0|ABD12_HUMAN Lysophosphatidylserine lipase ABHD12 OS=Homo sapiens OX=9606 GN=ABHD12 PE=1 SV=2;sp|Q8N2K0-3|ABD12_HUMAN Isoform 3 of Lysophos	Monoacylglycerol lipase ABHD12	ABHD12	+	2.31979	0.0102038	2.01505	+	+	4.12599	0.000568889	5.23963	+		0.124816	0.862951	0.253362		+	1.39246	0.0255597	-0.390799		14	14	14	49.3	49.3	49.3	45.558	0	75.672	2429000000	106	Q8N2K0-2;Q8N2K0;Q8N2K0-3;A0A5F9ZHQ0;A0A5F9ZHQ8;A0A5F9ZH71;A0A5F9ZH49;A0A5F9ZHH2;I3L206;A0A5F9ZGT4;A0A5F9ZGW7;A0A5F9ZH28;I3L1V0;Q5T712;A0A5F9ZHM3;I3L294;A0A5F9ZGZ9;A0A5F9ZHF0;A0A5F9ZHG5;A0A5F9ZHE8;I3L440;I3L380	Q8N2K0-2;Q8N2K0;Q8N2K0-3;A0A5F9ZHQ0;A0A5F9ZHQ8;A0A5F9ZH71;A0A5F9ZH49;A0A5F9ZHH2;I3L206;A0A5F9ZGT4;A0A5F9ZGW7;A0A5F9ZH28	20.3755	20.9135	21.4092	23.2071	22.5488	22.9875	26.1375	25.9755	26.3042	26.9044	26.6995	26.5495	26.2027	26.2687
tr|H0Y3K4|H0Y3K4_HUMAN RNA-binding protein 33 (Fragment) OS=Homo sapiens OX=9606 GN=RBM33 PE=1 SV=1		RBM33		1.23343	0.114584	-0.4883		+	1.97959	0.00551548	-0.808162			1.37693	0.0730547	-1.04378		+	1.32112	0.00809547	-1.05058		41	3	3	49.7	3.9	3.9	100.24	0	60.275	3712200000	48	H0Y3K4	H0Y3K4	27.1284	27.3503	27.4749	26.6102	27.1311	26.7474	26.2749	26.7782	26.4761	28.0542	28.4017	27.4871	26.7958	26.6239
sp|P67809|YBOX1_HUMAN Y-box-binding protein 1 OS=Homo sapiens OX=9606 GN=YBX1 PE=1 SV=3;tr|H0Y449|H0Y449_HUMAN Y-box-binding protein 1 (Fragment) OS=Homo sapiens OX=9606 GN=YBX1 PE=1 SV=1	Nuclease-sensitive element-binding protein 1	YBX1		NaN	1	0		+	1.14752	0.0231305	0.783342	+		0.825345	0.236755	0.765173			0.153126	0.847173	0.11335		3	3	3	15.4	15.4	15.4	35.924	0	12.805	155100000	24	P67809;H0Y449;C9J5V9	P67809;H0Y449	21.8309	21.944	22.0439	23.8035	22.8466	22.4048	23.2707	22.1793	22.7188	22.0086	22.1273	22.7796	23.1168	23.6634
sp|O15226|NKRF_HUMAN NF-kappa-B-repressing factor OS=Homo sapiens OX=9606 GN=NKRF PE=1 SV=2;sp|O15226-2|NKRF_HUMAN Isoform 2 of NF-kappa-B-repressing factor OS=Homo sapiens OX=9606 GN=NKRF	NF-kappa-B-repressing factor	NKRF	+	2.53309	0.00508333	2.27065	+	+	3.21326	0.00127451	3.22119	+		0.502053	0.404378	1.07376		+	5.1894	0	6.20282	+	21	21	21	40.4	40.4	40.4	77.672	0	195.03	5238800000	63	O15226;O15226-2	O15226;O15226-2	21.6333	21.8475	22.5423	24.0372	24.0837	24.7142	25.5519	25.213	24.9218	22.343	22.1568	22.3192	24.8979	23.4695
sp|Q96QD9|UIF_HUMAN UAP56-interacting factor OS=Homo sapiens OX=9606 GN=FYTTD1 PE=1 SV=3;sp|Q96QD9-2|UIF_HUMAN Isoform 2 of UAP56-interacting factor OS=Homo sapiens OX=9606 GN=FYTTD1;sp|Q96QD9-3|UIF_HUMAN Isoform 3 of UAP56-interacting factor OS=Homo sapie	UAP56-interacting factor	FYTTD1	+	1.69841	0.022695	2.26852	+	+	1.29827	0.0107331	1.57063	+		0.340559	0.575813	1.04995		+	2.15257	0.000667826	2.24562	+	5	5	5	19.2	19.2	19.2	35.818	0	19.759	398560000	10	Q96QD9;Q96QD9-2;Q96QD9-3;H9KVD1;H9KVC6;Q96QD9-4;H9KVC1;H9KVD5	Q96QD9;Q96QD9-2;Q96QD9-3	22.1364	23.0879	21.1498	24.8339	24.2982	24.0476	23.7495	23.5167	23.8199	21.4162	22.8457	21.9461	24.5309	24.1048
sp|O00267|SPT5H_HUMAN Transcription elongation factor SPT5 OS=Homo sapiens OX=9606 GN=SUPT5H PE=1 SV=1;sp|O00267-2|SPT5H_HUMAN Isoform 2 of Transcription elongation factor SPT5 OS=Homo sapiens OX=9606 GN=SUPT5H	Transcription elongation factor SPT5	SUPT5H	+	2.4283	0.00781081	2.25388	+	+	3.92164	0.000751592	4.40885	+		0.934963	0.116172	4.86266		+	5.21	0	15.3664	+	86	86	86	66	66	66	121	0	323.31	357020000000	837	O00267;O00267-2;M0QYL9;M0R2M5	O00267;O00267-2	19.6964	20.0688	19.3563	22.5778	21.6098	21.6955	24.5293	24.0062	23.8125	20.277	19.1687	18.6409	27.3639	25.762
sp|Q9UQR1|ZN148_HUMAN Zinc finger protein 148 OS=Homo sapiens OX=9606 GN=ZNF148 PE=1 SV=2	Zinc finger protein 148	ZNF148	+	5.62785	0	2.23719	+	+	4.12945	0.00073065	3.1692	+	+	3.65409	0.0252308	3.73316	+	+	4.92439	0	4.00655	+	25	24	24	47.2	46.2	46.2	88.975	0	309.64	4654100000	166	Q9UQR1;G5E9X2;Q9UQR1-2;C9JRX0;C9K0U4;C9J6Y6	Q9UQR1	25.5108	25.3724	25.351	27.6382	27.6964	27.6111	28.3119	28.5014	28.9284	22.8936	23.0825	22.5904	27.1011	26.3621
tr|E9PK91|E9PK91_HUMAN Bcl-2-associated transcription factor 1 OS=Homo sapiens OX=9606 GN=BCLAF1 PE=1 SV=1;sp|Q9NYF8-3|BCLF1_HUMAN Isoform 3 of Bcl-2-associated transcription factor 1 OS=Homo sapiens OX=9606 GN=BCLAF1;tr|E9PQN2|E9PQN2_HUMAN Bcl-2-associate	Bcl-2-associated transcription factor 1	BCLAF1	+	1.35081	0.0365164	2.23067	+	+	2.33064	0.00147232	2.47005	+		0.816124	0.169508	3.64725		+	3.38337	0	3.41767	+	44	1	1	42.5	1.8	1.8	100.4	0	6.9202	1368500000	19	E9PK91;Q9NYF8-3;E9PQN2;E9PKI6;E9PK09;A0A1W2PQ43;E9PJA7;H0YF00;H0YF63	E9PK91;Q9NYF8-3;E9PQN2;E9PKI6;E9PK09;A0A1W2PQ43	21.9361	21.4376	22.1264	24.746	24.8687	22.5774	23.8203	24.0341	25.0559	21.4702	22.4772	21.9641	27.4768	27.8499
sp|P11142|HSP7C_HUMAN Heat shock cognate 71 kDa protein OS=Homo sapiens OX=9606 GN=HSPA8 PE=1 SV=1;tr|E9PKE3|E9PKE3_HUMAN Heat shock cognate 71 kDa protein OS=Homo sapiens OX=9606 GN=HSPA8 PE=1 SV=1;sp|P11142-2|HSP7C_HUMAN Isoform 2 of Heat shock cognate 7	Heat shock cognate 71 kDa protein	HSPA8	+	2.75	0.00444615	2.20353	+	+	2.50423	0.00151855	1.8862	+	+	1.59071	0.039844	2.15118	+	+	4.42735	0	3.69319	+	36	36	29	64.1	64.1	55.7	70.897	0	323.31	48328000000	582	P11142;E9PKE3;P11142-2;E9PNE6;E9PN89;A8K7Q2;E9PLF4;E9PQQ4;E9PQK7;E9PK54;P54652;E9PPY6;E9PN25;E9PI65;E9PS65;E9PM13	P11142;E9PKE3;P11142-2;E9PNE6;E9PN89;A8K7Q2	29.1726	28.583	28.2199	31.0767	30.7696	30.7398	30.6206	30.3385	30.675	27.4712	27.3166	27.7814	30.3149	30.2434
sp|Q8N680|ZBTB2_HUMAN Zinc finger and BTB domain-containing protein 2 OS=Homo sapiens OX=9606 GN=ZBTB2 PE=1 SV=1	Zinc finger and BTB domain-containing protein 2	ZBTB2	+	2.72852	0.00442912	2.16212	+	+	2.97158	0.00105548	2.93933	+		0.517828	0.361146	1.84727		+	3.1288	0	3.90227	+	6	6	6	15	15	15	57.336	0	36.093	1215200000	37	Q8N680	Q8N680	22.7566	21.8988	21.9167	24.1831	24.4057	24.4697	24.9432	24.9146	25.5323	21.4885	22.4265	22.8582	25.6226	25.6132
tr|X6RLT1|X6RLT1_HUMAN Negative elongation factor C/D (Fragment) OS=Homo sapiens OX=9606 GN=NELFCD PE=1 SV=1;tr|H0UI80|H0UI80_HUMAN Negative elongation factor C/D OS=Homo sapiens OX=9606 GN=NELFCD PE=1 SV=1;sp|Q8IXH7-4|NELFD_HUMAN Isoform NELF-D of Negativ	Negative elongation factor C/D	NELFCD;TH1L	+	1.48125	0.0313986	2.10012	+	+	3.78721	0.00105169	2.77574	+		0.411995	0.577213	-0.353606		+	1.58225	0.00638428	0.762892	+	9	9	9	20.2	20.2	20.2	66.432	0	32.194	1056500000	30	X6RLT1;H0UI80;Q8IXH7-4;Q8IXH7;Q8IXH7-3	X6RLT1;H0UI80;Q8IXH7-4;Q8IXH7	21.5316	21.6229	21.1176	24.4368	23.841	22.2946	24.1914	24.4278	23.9801	25.2938	24.617	24.8439	24.2694	24.2483
tr|H0YEN0|H0YEN0_HUMAN Synembryn-A (Fragment) OS=Homo sapiens OX=9606 GN=RIC8A PE=1 SV=8;sp|Q9NPQ8-2|RIC8A_HUMAN Isoform 2 of Synembryn-A OS=Homo sapiens OX=9606 GN=RIC8A;sp|Q9NPQ8-4|RIC8A_HUMAN Isoform 4 of Synembryn-A OS=Homo sapiens OX=9606 GN=RIC8A;sp|	Synembryn-A	RIC8A		NaN	1	0			NaN	1	0			1.29875	0.0864676	-0.980141			0.0764216	0.918813	0.0869624		3	3	3	9.8	9.8	9.8	32.38	0.0020522	2.9614	168370000	8	H0YEN0;Q9NPQ8-2;Q9NPQ8-4;Q9NPQ8;Q9NPQ8-3;E9PSI0	H0YEN0;Q9NPQ8-2;Q9NPQ8-4;Q9NPQ8;Q9NPQ8-3	22.5322	23.3342	22.1622	23.301	21.3669	22.5189	22.949	19.5887	22.1773	22.703	22.9954	23.3453	22.4899	21.4657
sp|Q9Y2L8|ZKSC5_HUMAN Zinc finger protein with KRAB and SCAN domains 5 OS=Homo sapiens OX=9606 GN=ZKSCAN5 PE=1 SV=1	Zinc finger protein with KRAB and SCAN domains 5	ZKSCAN5	+	2.59786	0.00513684	2.05762	+	+	1.92217	0.00392053	1.5578	+		0.946689	0.127453	2.33463		+	2.67157	0	3.33853	+	21	21	19	34.2	34.2	33.4	96.902	0	254.69	5458600000	120	Q9Y2L8;F8WBD4	Q9Y2L8	24.709	24.4835	25.4615	27.0009	26.7918	27.0341	26.1631	26.3365	26.8277	23.9927	24.1812	25.2496	27.9141	27.875
tr|H0YEX2|H0YEX2_HUMAN Transcription initiation factor TFIID 150 kDa subunit (Fragment) OS=Homo sapiens OX=9606 GN=TAF2 PE=1 SV=1		TAF2	+	1.63253	0.0444211	-0.688546			1.09341	0.0594506	-0.384411			0.147348	0.831703	0.250046			0.549891	0.280757	-0.258401		18	5	5	56	20	20	42.145	0	323.31	9909600000	124	H0YEX2	H0YEX2	28.4521	28.8652	28.7862	28.1213	28.1916	27.7249	28.465	28.1107	28.3746	28.3902	28.3169	27.7352	27.5691	28.0685
tr|H0YFD6|H0YFD6_HUMAN Enoyl-CoA hydratase OS=Homo sapiens OX=9606 GN=HADHA PE=1 SV=2;sp|P40939|ECHA_HUMAN Trifunctional enzyme subunit alpha, mitochondrial OS=Homo sapiens OX=9606 GN=HADHA PE=1 SV=2;tr|A0A2R8Y4F5|A0A2R8Y4F5_HUMAN Enoyl-CoA hydratase OS=Ho	Trifunctional enzyme subunit alpha, mitochondrial;Long-chain enoyl-CoA hydratase;Long chain 3-hydroxyacyl-CoA dehydrogenase	HADHA		0.239708	0.696341	-0.609197			0.387364	0.312031	-0.901794			1.3365	0.203859	0.342899			0.412459	0.480403	0.213756		6	6	6	12.6	12.6	12.6	86.371	0	19.367	391190000	20	H0YFD6;P40939;A0A2R8Y4F5;A0A2R8YG21;A0A2R8Y688	H0YFD6;P40939;A0A2R8Y4F5;A0A2R8YG21	21.2224	22.2934	24.5163	22.5464	21.7099	21.9483	21.4936	21.9707	21.8625	23.7607	24.1423	24.0719	24.3841	24.322
sp|P56134-3|ATPK_HUMAN Isoform 3 of ATP synthase subunit f, mitochondrial OS=Homo sapiens OX=9606 GN=ATP5MF;sp|P56134|ATPK_HUMAN ATP synthase subunit f, mitochondrial OS=Homo sapiens OX=9606 GN=ATP5MF PE=1 SV=3;tr|C9JJT5|C9JJT5_HUMAN ATP synthase membrane	ATP synthase subunit f, mitochondrial	ATP5J2;ATP5J2-PTCD1		0.475985	0.323825	-1.30225		+	2.00541	0.00203928	5.1879	+		1.04588	0.184696	-0.602546		+	3.60453	0	-1.33429		3	3	3	67.3	67.3	67.3	6.2953	0	56.026	5395100000	84	P56134-3;P56134;C9JJT5;C9JU26;G3V325;P56134-4;P56134-2	P56134-3;P56134;C9JJT5;C9JU26;G3V325;P56134-4;P56134-2	23.8653	21.0669	24.7993	21.2689	22.6172	21.9387	28.3418	28.5339	28.4195	28.098	28.3359	28.3277	27.5529	27.2599
tr|J3KMZ9|J3KMZ9_HUMAN Low-density lipoprotein receptor (Fragment) OS=Homo sapiens OX=9606 GN=LDLR PE=1 SV=1;tr|H0YMD1|H0YMD1_HUMAN Low-density lipoprotein receptor OS=Homo sapiens OX=9606 GN=LDLR PE=1 SV=1;sp|P01130-2|LDLR_HUMAN Isoform 2 of Low-density l	Low-density lipoprotein receptor	LDLR		NaN	1	0			0.347174	0.377623	0.971956			0.0846028	0.899348	-0.241134		+	4.29735	0	2.37092	+	6	6	6	9.1	9.1	9.1	104.56	0	46.728	511910000	15	J3KMZ9;H0YMD1;P01130-2;P01130-3;P01130-6;P01130-4;P01130-5;P01130;H0YM92;H0YMQ3	J3KMZ9;H0YMD1;P01130-2;P01130-3;P01130-6;P01130-4;P01130-5;P01130;H0YM92	23.8478	21.1039	20.9957	23.1267	22.7088	22.7541	23.9333	21.6208	23.3092	22.6001	22.7794	22.5872	22.5296	20.614
tr|B5MDF5|B5MDF5_HUMAN GTP-binding nuclear protein Ran OS=Homo sapiens OX=9606 GN=RAN PE=1 SV=1;sp|P62826|RAN_HUMAN GTP-binding nuclear protein Ran OS=Homo sapiens OX=9606 GN=RAN PE=1 SV=3;tr|J3KQE5|J3KQE5_HUMAN GTP-binding nuclear protein Ran (Fragment) O	GTP-binding nuclear protein Ran	RAN	+	2.07523	0.0147674	2.0483	+	+	2.24726	0.00188606	2.32489	+	+	1.46288	0.0464987	2.80002	+	+	1.46712	0.00342661	2.59046	+	6	6	6	27	27	27	26.224	0	13.962	634720000	35	B5MDF5;P62826;J3KQE5;F5H018;B4DV51;H0YFC6;A0A087X0W0	B5MDF5;P62826;J3KQE5;F5H018;B4DV51	22.3628	23.7951	23.0539	25.2231	25.1949	24.9386	25.5311	25.1621	25.4932	20.8135	23.3013	23.2087	25.6311	25.5602
tr|H0YNK8|H0YNK8_HUMAN ER membrane protein complex subunit 4 OS=Homo sapiens OX=9606 GN=EMC4 PE=1 SV=1;sp|Q5J8M3-2|EMC4_HUMAN Isoform 2 of ER membrane protein complex subunit 4 OS=Homo sapiens OX=9606 GN=EMC4;sp|Q5J8M3|EMC4_HUMAN ER membrane protein comple	ER membrane protein complex subunit 4	EMC4		NaN	1	0			0.508014	0.163314	1.08232			0.294137	0.632646	-0.817314			0.0252704	0.982071	-0.00655238		6	6	6	68.6	68.6	68.6	11.151	0	18.666	1022100000	22	H0YNK8;Q5J8M3-2;Q5J8M3;S4R329;H0YK61;H0YNK0;H0YLP8;Q5J8M3-3;H0YMH5;H0YN63	H0YNK8;Q5J8M3-2;Q5J8M3;S4R329;H0YK61;H0YNK0;H0YLP8;Q5J8M3-3	22.4158	21.8998	21.896	21.915	21.9196	21.6531	24.963	21.9963	22.4993	25.5	25.6463	25.6235	22.6288	25.2545
sp|Q9H582|ZN644_HUMAN Zinc finger protein 644 OS=Homo sapiens OX=9606 GN=ZNF644 PE=1 SV=2;sp|Q9H582-2|ZN644_HUMAN Isoform 2 of Zinc finger protein 644 OS=Homo sapiens OX=9606 GN=ZNF644	Zinc finger protein 644	ZNF644	+	2.91328	0.00419512	2.03412	+	+	3.85094	0.000991354	3.9033	+	+	2.03663	0.0192332	2.833	+	+	4.07458	0	5.76249	+	54	54	54	53.7	53.7	53.7	149.56	0	323.31	42230000000	567	Q9H582;Q9H582-2;A0A087WZL9;Q9H582-3	Q9H582;Q9H582-2	26.986	26.9774	27.6663	29.4286	29.2155	29.0879	31.003	31.4129	30.9237	24.9244	25.0946	26.0056	28.7855	28.5504
sp|Q9HCM1|RESF1_HUMAN Retroelement silencing factor 1 OS=Homo sapiens OX=9606 GN=RESF1 PE=1 SV=3	Uncharacterized protein KIAA1551	KIAA1551	+	1.50425	0.0305646	2.02956	+	+	3.5557	0.000982857	7.84571	+	+	3.28551	0.0168	4.60516	+	+	4.24185	0	7.37661	+	61	61	61	50	50	50	194.86	0	323.31	17270000000	391	Q9HCM1;J3KPI3;F5H488	Q9HCM1	23.5759	22.6629	21.4849	24.7301	24.3011	24.7812	29.9365	30.7719	30.5524	22.7748	21.9921	21.3593	26.9878	26.6196
sp|P46013|KI67_HUMAN Proliferation marker protein Ki-67 OS=Homo sapiens OX=9606 GN=MKI67 PE=1 SV=2;sp|P46013-2|KI67_HUMAN Isoform Short of Proliferation marker protein Ki-67 OS=Homo sapiens OX=9606 GN=MKI67	Antigen KI-67	MKI67	+	1.24585	0.0449799	2.00654	+	+	3.03769	0.00125	4.90442	+		0.991119	0.109735	2.75145		+	4.56045	0	7.50538	+	83	83	83	39.7	39.7	39.7	358.69	0	323.31	21294000000	353	P46013;P46013-2	P46013;P46013-2	24.1637	23.6292	22.2996	25.7129	26.04	24.3592	28.2217	28.3768	28.2072	23.5419	22.5972	23.0099	27.1234	27.0236
sp|P22626|ROA2_HUMAN Heterogeneous nuclear ribonucleoproteins A2/B1 OS=Homo sapiens OX=9606 GN=HNRNPA2B1 PE=1 SV=2;sp|P22626-2|ROA2_HUMAN Isoform A2 of Heterogeneous nuclear ribonucleoproteins A2/B1 OS=Homo sapiens OX=9606 GN=HNRNPA2B1;tr|A0A087WUI2|A0A087	Heterogeneous nuclear ribonucleoproteins A2/B1	HNRNPA2B1	+	3.58568	0.00295858	2.00411	+	+	1.0727	0.0400454	0.55092	+	+	2.38142	0.0140714	3.30085	+	+	3.19753	0	3.12653	+	19	19	19	64	64	64	37.429	0	294.26	4191700000	134	P22626;P22626-2;A0A087WUI2	P22626;P22626-2;A0A087WUI2	26.3698	26.4739	26.0278	28.4711	28.1497	28.263	27.0839	26.9964	26.444	24.6094	24.0604	23.9068	28.1747	27.8285
sp|Q9H501|ESF1_HUMAN ESF1 homolog OS=Homo sapiens OX=9606 GN=ESF1 PE=1 SV=1	ESF1 homolog	ESF1	+	2.15498	0.0111335	1.97468	+	+	4.11471	0.000573991	5.3644	+	+	1.73101	0.0245397	4.74224	+	+	4.73896	0	8.27122	+	35	35	18	38.4	38.4	20.1	98.795	0	323.31	16308000000	205	Q9H501	Q9H501	22.6209	21.5263	21.9005	24.3608	24.0005	23.6105	27.4229	27.3997	27.3184	22.4263	21.9553	21.2587	27.9352	27.6851
sp|Q9P2K3-4|RCOR3_HUMAN Isoform 4 of REST corepressor 3 OS=Homo sapiens OX=9606 GN=RCOR3;sp|Q9P2K3|RCOR3_HUMAN REST corepressor 3 OS=Homo sapiens OX=9606 GN=RCOR3 PE=1 SV=2;sp|Q9P2K3-3|RCOR3_HUMAN Isoform 3 of REST corepressor 3 OS=Homo sapiens OX=9606 GN=	REST corepressor 3	RCOR3	+	2.41477	0.00857143	1.96611	+	+	1.88153	0.00400578	1.55281	+	+	1.83792	0.0302918	1.80412	+	+	1.28046	0.0072877	1.42032	+	10	5	5	26.7	14.3	14.3	50.376	0	12.734	259330000	12	Q9P2K3-4;Q9P2K3;Q9P2K3-3;B4DV59;Q9P2K3-2;E9PQE5;H0YF22;E9PR63;H0YDD7;H0YDR8	Q9P2K3-4;Q9P2K3;Q9P2K3-3;B4DV59;Q9P2K3-2;E9PQE5	22.3747	23.3239	22.3283	24.665	24.6966	24.5636	24.1121	24.0142	24.559	21.9024	21.7575	21.2831	23.9684	23.7111
tr|H3BPK3|H3BPK3_HUMAN Hydroxyacylglutathione hydrolase, mitochondrial (Fragment) OS=Homo sapiens OX=9606 GN=HAGH PE=1 SV=1;sp|Q16775-2|GLO2_HUMAN Isoform 2 of Hydroxyacylglutathione hydrolase, mitochondrial OS=Homo sapiens OX=9606 GN=HAGH;sp|Q16775|GLO2_H	Hydroxyacylglutathione hydrolase, mitochondrial	HAGH	+	1.52463	0.0283168	-2.73565		+	4.11441	0.000851986	-3.96795			0.25294	0.68718	-0.782861		+	1.15087	0.0112248	-1.23472		5	5	5	25.5	25.5	25.5	26.305	0	10.151	188330000	23	H3BPK3;Q16775-2;Q16775;H3BPQ4;H3BQW8;H3BV79;Q16775-3	H3BPK3;Q16775-2;Q16775;H3BPQ4	25.5755	25.8188	25.9623	24.1963	23.4942	21.4592	22.2381	21.6216	21.593	24.2673	24.0014	24.5816	24.5455	21.0747
sp|Q8IY81|SPB1_HUMAN pre-rRNA 2-O-ribose RNA methyltransferase FTSJ3 OS=Homo sapiens OX=9606 GN=FTSJ3 PE=1 SV=2	pre-rRNA processing protein FTSJ3	FTSJ3	+	1.6311	0.0259898	1.95778	+	+	0.917813	0.0293968	1.56616	+	+	2.7051	0.0109143	3.41266	+	+	3.54024	0	3.7313	+	9	9	9	16.1	16.1	16.1	96.557	0	49.193	535090000	14	Q8IY81	Q8IY81	21.3068	21.7651	22.6384	24.0996	24.3762	23.1078	24.2772	24.0449	22.0867	21.3943	20.7838	20.7746	24.8219	24.8265
tr|H3BQZ7|H3BQZ7_HUMAN HCG2044799 OS=Homo sapiens OX=9606 GN=HNRNPUL2-BSCL2 PE=4 SV=1;sp|Q1KMD3|HNRL2_HUMAN Heterogeneous nuclear ribonucleoprotein U-like protein 2 OS=Homo sapiens OX=9606 GN=HNRNPUL2 PE=1 SV=1	Heterogeneous nuclear ribonucleoprotein U-like protein 2	HNRNPUL2-BSCL2;HNRNPUL2		0.980082	0.0779514	2.83246			0.670053	0.0709172	2.01911		+	2.7634	0.011403	3.30665	+	+	3.7159	0	2.39974	+	16	16	16	28.7	28.7	28.7	84.69	0	75.259	2202800000	73	H3BQZ7;Q1KMD3	H3BQZ7;Q1KMD3	21.1586	24.6586	25.5559	26.9487	26.6225	26.2993	25.662	25.4454	26.3231	23.9502	23.6212	23.5778	27.6746	27.1763
sp|O14617-4|AP3D1_HUMAN Isoform 4 of AP-3 complex subunit delta-1 OS=Homo sapiens OX=9606 GN=AP3D1;sp|O14617|AP3D1_HUMAN AP-3 complex subunit delta-1 OS=Homo sapiens OX=9606 GN=AP3D1 PE=1 SV=1;sp|O14617-5|AP3D1_HUMAN Isoform 5 of AP-3 complex subunit delta	AP-3 complex subunit delta-1	AP3D1		NaN	1	0		+	3.88575	0.000794613	5.12264	+	+	2.33411	0.0209004	-1.05856		+	2.50857	0.00146945	-0.784662		21	21	21	25.7	25.7	25.7	114.71	0	75.788	2154000000	121	O14617-4;O14617;O14617-5;O14617-2;O14617-3;A0A2R8Y611;A0A2R8Y4J3;A0A087WYN6;K7ERW8;K7ELX8	O14617-4;O14617;O14617-5;O14617-2;O14617-3;A0A2R8Y611;A0A2R8Y4J3	21.3288	20.7825	21.9749	22.1613	21.8287	21.7213	26.6237	26.3749	26.4556	26.8398	27.1568	27.0636	26.2739	25.8614
tr|H3BS42|H3BS42_HUMAN Zinc finger protein 768 OS=Homo sapiens OX=9606 GN=ZNF768 PE=1 SV=2;sp|Q9H5H4|ZN768_HUMAN Zinc finger protein 768 OS=Homo sapiens OX=9606 GN=ZNF768 PE=1 SV=2	Zinc finger protein 768	ZNF768		1.06693	0.131076	-0.534138		+	2.39896	0.00245643	-1.2996			0.938019	0.187531	-0.818177		+	1.97352	0.00267699	-0.86761		13	13	13	26.5	26.5	26.5	56.668	0	36.147	2626700000	108	H3BS42;Q9H5H4	H3BS42;Q9H5H4	28.3919	28.2906	28.8278	28.2565	27.9765	27.6749	26.9212	27.3071	27.3833	27.0627	27.2107	27.2479	25.8568	26.0545
tr|F8VVA7|F8VVA7_HUMAN Coatomer subunit zeta OS=Homo sapiens OX=9606 GN=COPZ1 PE=1 SV=1;sp|P61923|COPZ1_HUMAN Coatomer subunit zeta-1 OS=Homo sapiens OX=9606 GN=COPZ1 PE=1 SV=1;tr|F8W651|F8W651_HUMAN Coatomer subunit zeta OS=Homo sapiens OX=9606 GN=COPZ1 P	Coatomer subunit zeta-1	COPZ1		NaN	1	0		+	6.63848	0	5.12187	+		1.56848	0.0636325	-0.837651			0.385807	0.496132	-0.232175		5	5	5	48.5	48.5	48.5	22.34	0	236.6	4847800000	79	F8VVA7;P61923;F8W651;F8VYZ4;P61923-5;P61923-4;F8VXB1;F8VUC5;F8W156;F8VYK5;F8VXR1;P61923-2;P61923-3;F8VYE0	F8VVA7;P61923;F8W651;F8VYZ4;P61923-5;P61923-4;F8VXB1;F8VUC5;F8W156	22.0474	22.2151	22.211	22.2407	22.0727	22.4734	27.2068	27.2684	27.3639	27.3903	28.0995	28.1258	27.127	26.9687
sp|O60506-4|HNRPQ_HUMAN Isoform 4 of Heterogeneous nuclear ribonucleoprotein Q OS=Homo sapiens OX=9606 GN=SYNCRIP;sp|O60506-3|HNRPQ_HUMAN Isoform 3 of Heterogeneous nuclear ribonucleoprotein Q OS=Homo sapiens OX=9606 GN=SYNCRIP;sp|O60506-2|HNRPQ_HUMAN Isof	Heterogeneous nuclear ribonucleoprotein Q	SYNCRIP	+	3.42762	0.0026738	1.93609	+	+	2.39658	0.00309446	0.977214	+	+	1.76051	0.0266616	3.0382	+	+	1.98978	0.00102256	2.71576	+	15	8	8	29.6	19.9	19.9	58.735	0	26.229	742230000	41	O60506-4;O60506-3;O60506-2;O60506;B7Z645;O60506-5;F6UXX1	O60506-4;O60506-3;O60506-2;O60506;B7Z645;O60506-5	24.7184	24.3311	24.2918	26.6006	26.2831	26.2658	25.4146	25.5884	25.27	21.4292	22.7418	20.955	25.3401	25.2799
sp|Q03701|CEBPZ_HUMAN CCAAT/enhancer-binding protein zeta OS=Homo sapiens OX=9606 GN=CEBPZ PE=1 SV=3	CCAAT/enhancer-binding protein zeta	CEBPZ		NaN	1	0		+	3.61139	0.000891192	5.11556	+		0.913841	0.282505	0.374278			0.673666	0.329607	0.167966		14	14	14	16.4	16.4	16.4	120.97	0	103.2	3108300000	71	Q03701;C9J9W7	Q03701	20.8688	22.0997	22.0667	21.8111	21.8769	22.6518	26.9517	26.673	26.7571	27.0134	26.8005	26.6598	26.9493	27.1467
sp|Q01105-2|SET_HUMAN Isoform 2 of Protein SET OS=Homo sapiens OX=9606 GN=SET;tr|A0A0C4DFV9|A0A0C4DFV9_HUMAN Protein SET OS=Homo sapiens OX=9606 GN=SET PE=1 SV=1;sp|Q01105-3|SET_HUMAN Isoform 3 of Protein SET OS=Homo sapiens OX=9606 GN=SET;sp|Q01105-4|SET_	Protein SET;Protein SETSIP	SET;SETSIP	+	2.02206	0.0154813	1.91257	+	+	1.14008	0.0197026	0.984238	+		1.06295	0.11924	1.19833		+	0.881074	0.0335412	0.931419	+	4	4	4	24.2	24.2	24.2	32.103	0	14.881	322140000	11	Q01105-2;A0A0C4DFV9;Q01105-3;Q01105-4;Q01105;A0A087X027;P0DME0	Q01105-2;A0A0C4DFV9;Q01105-3;Q01105-4;Q01105;A0A087X027;P0DME0	23.6713	22.2797	22.8485	24.9785	24.7742	24.7845	23.9835	23.8429	23.9258	22.6674	21.9397	23.5372	23.4917	23.8607
sp|Q14592|ZN460_HUMAN Zinc finger protein 460 OS=Homo sapiens OX=9606 GN=ZNF460 PE=1 SV=2;sp|Q14592-2|ZN460_HUMAN Isoform 2 of Zinc finger protein 460 OS=Homo sapiens OX=9606 GN=ZNF460	Zinc finger protein 460	ZNF460	+	1.38883	0.0360617	1.89713	+	+	1.84381	0.003429	2.51625	+		0.0657893	0.924554	-0.134281		+	3.07651	0	2.09798	+	16	13	12	33.1	29.9	28.3	63.664	0	322.4	10683000000	184	Q14592;Q14592-2;M0R0J6	Q14592;Q14592-2	26.3642	25.3537	27.4552	27.9116	28.3922	28.5607	28.8682	28.9419	28.9118	26.6267	26.4053	27.1451	27.4844	27.0254
sp|Q5VYV7|SLX4I_HUMAN Protein SLX4IP OS=Homo sapiens OX=9606 GN=SLX4IP PE=1 SV=1	Protein SLX4IP	SLX4IP	+	2.5356	0.0067619	1.89558	+	+	3.99866	0.000789298	4.15861	+		1.04487	0.0928576	3.9583		+	3.83773	0	6.36172	+	18	18	18	52.9	52.9	52.9	45.551	0	323.31	5466200000	112	Q5VYV7	Q5VYV7	22.8459	22.7335	22.0215	24.3408	24.6982	24.2486	26.8088	26.5632	26.7046	22.4245	20.9274	22.035	27.5242	27.4276
sp|Q92620|PRP16_HUMAN Pre-mRNA-splicing factor ATP-dependent RNA helicase PRP16 OS=Homo sapiens OX=9606 GN=DHX38 PE=1 SV=2	Pre-mRNA-splicing factor ATP-dependent RNA helicase PRP16	DHX38	+	2.86219	0.00453333	1.88327	+	+	4.51282	0	4.92746	+		1.27221	0.0583664	3.0855		+	3.43481	0	4.2931	+	13	13	13	14.2	14.2	14.2	140.5	0	104.5	1581200000	74	Q92620;Q92620-2;H3BQT9;H3BV01;J3KTG2;J3KRT1	Q92620	21.5278	21.9751	22.3152	23.7292	23.953	23.7857	26.9824	26.8012	26.8169	22.0973	21.6347	20.9849	25.7918	25.7053
tr|H3BVI4|H3BVI4_HUMAN Lipase maturation factor OS=Homo sapiens OX=9606 GN=LMF1 PE=1 SV=1;sp|Q96S06-2|LMF1_HUMAN Isoform 2 of Lipase maturation factor 1 OS=Homo sapiens OX=9606 GN=LMF1;sp|Q96S06|LMF1_HUMAN Lipase maturation factor 1 OS=Homo sapiens OX=9606	Lipase maturation factor;Lipase maturation factor 1	LMF1		NaN	1	0			NaN	1	0			0.703855	0.325127	-0.511529		+	1.76227	0.00227246	-1.49183		2	2	2	12.3	12.3	12.3	40.147	0	6.326	22438000	5	H3BVI4;Q96S06-2;Q96S06	H3BVI4;Q96S06-2;Q96S06	23.2591	21.7195	21.2052	20.6471	22.3474	22.2419	23.722	21.3897	22.96	22.0609	22.5829	22.6845	22.0488	21.4169
sp|P63279|UBC9_HUMAN SUMO-conjugating enzyme UBC9 OS=Homo sapiens OX=9606 GN=UBE2I PE=1 SV=1;tr|H3BQQ9|H3BQQ9_HUMAN SUMO-conjugating enzyme UBC9 (Fragment) OS=Homo sapiens OX=9606 GN=UBE2I PE=1 SV=1;tr|B0QYN7|B0QYN7_HUMAN SUMO-conjugating enzyme UBC9 OS=Ho	SUMO-conjugating enzyme UBC9	UBE2I	+	3.36389	0.00341748	1.81455	+	+	2.91876	0.00125943	2.05348	+	+	1.81668	0.023969	2.61645	+	+	4.18671	0	2.61717	+	12	12	12	79.7	79.7	79.7	18.007	0	323.31	11654000000	146	P63279;H3BQQ9;B0QYN7;H3BPC4	P63279;H3BQQ9;B0QYN7;H3BPC4	26.3607	26.7208	26.6431	28.2275	28.295	28.6457	28.9134	28.788	28.1836	25.6842	25.9506	25.8636	29.6519	28.2195
tr|H7BZK2|H7BZK2_HUMAN Transient receptor potential cation channel subfamily V member 2 (Fragment) OS=Homo sapiens OX=9606 GN=TRPV2 PE=1 SV=1;sp|Q9Y5S1|TRPV2_HUMAN Transient receptor potential cation channel subfamily V member 2 OS=Homo sapiens OX=9606 GN=	Transient receptor potential cation channel subfamily V member 2	TRPV2		NaN	1	0			NaN	1	0			0.988396	0.129152	-1.5287		+	1.92935	0.00160658	-1.40915		4	4	4	21.4	21.4	21.4	29.004	0	8.1013	137870000	11	H7BZK2;Q9Y5S1	H7BZK2;Q9Y5S1	21.9001	21.5055	21.0883	23.1181	21.4564	22.5268	21.7513	21.5176	22.8288	24.2375	23.9021	24.2999	24.0429	21.9979
tr|H7C0H2|H7C0H2_HUMAN RNA-binding protein 33 (Fragment) OS=Homo sapiens OX=9606 GN=RBM33 PE=1 SV=1		RBM33		0.865529	0.114161	-2.26626		+	1.0999	0.0211329	-1.04348			0.620816	0.348965	-0.653519			0.447795	0.329695	-0.324214		10	2	2	42.4	12	12	38.976	0	13.921	3954800000	65	H7C0H2	H7C0H2	26.5769	26.5492	27.8985	25.9583	22.4766	25.7909	26.0092	25.9709	25.9139	27.8525	28.1848	27.2245	26.3991	27.1959
tr|H7C0N4|H7C0N4_HUMAN Splicing factor 1 (Fragment) OS=Homo sapiens OX=9606 GN=SF1 PE=1 SV=1		SF1	+	2.13753	0.025555	-0.768078		+	3.90805	0.000983193	-2.11782			0.00991786	0.989164	0.0133127		+	3.66389	0	-1.12965		5	3	2	36.1	28.3	21.1	18.639	0	51.761	1124900000	78	H7C0N4	H7C0N4	27.133	27.5686	27.5413	26.6465	26.7469	26.5453	25.3469	25.2951	25.2475	25.3478	25.2257	25.4998	24.9769	24.8965
tr|H7C1N3|H7C1N3_HUMAN BET1 homolog (Fragment) OS=Homo sapiens OX=9606 GN=BET1 PE=1 SV=1;sp|O15155|BET1_HUMAN BET1 homolog OS=Homo sapiens OX=9606 GN=BET1 PE=1 SV=1;tr|A0A3B3IU16|A0A3B3IU16_HUMAN BET1 homolog OS=Homo sapiens OX=9606 GN=BET1 PE=1 SV=1;tr|C9	BET1 homolog	BET1;DKFZp781C0425		0.494472	0.312041	-1.19706			0.524004	0.155571	1.00573			0.112389	0.873051	-0.325208			0.692631	0.618541	0.0901566		2	2	2	21.8	21.8	21.8	14.872	0	51.254	576990000	31	H7C1N3;O15155;A0A3B3IU16;C9JTT8;Q68DU7;O15155-2	H7C1N3;O15155;A0A3B3IU16;C9JTT8;Q68DU7;O15155-2	21.8801	24.4026	24.3548	21.7335	23.6461	21.6667	24.8221	24.4262	24.4065	24.4573	24.5008	24.426	22.1198	24.645
tr|H7C285|H7C285_HUMAN Tetraspanin-15 (Fragment) OS=Homo sapiens OX=9606 GN=TSPAN15 PE=1 SV=1;sp|O95858|TSN15_HUMAN Tetraspanin-15 OS=Homo sapiens OX=9606 GN=TSPAN15 PE=1 SV=1	Tetraspanin-15	TSPAN15		NaN	1	0			NaN	1	0			1.94363	0.190522	-0.250884			0.419976	0.72492	-0.0882193		2	2	2	12.5	12.5	12.5	18.219	0	5.4381	321260000	7	H7C285;O95858	H7C285;O95858	22.4667	21.9281	23.0451	21.5347	21.5984	22.0202	23.2274	21.4324	22.5671	24.0389	23.9307	24.1191	23.7496	23.7985
sp|Q96LW9|ZSC31_HUMAN Zinc finger and SCAN domain-containing protein 31 OS=Homo sapiens OX=9606 GN=ZSCAN31 PE=1 SV=2;tr|C9JPM5|C9JPM5_HUMAN Zinc finger and SCAN domain-containing protein 31 (Fragment) OS=Homo sapiens OX=9606 GN=ZSCAN31 PE=1 SV=1;sp|Q96LW9-	Zinc finger and SCAN domain-containing protein 31	ZSCAN31	+	1.68076	0.0257526	1.78137	+	+	2.50195	0.00144455	2.16762	+		0.854673	0.148793	4.37137		+	2.90281	0	3.05722	+	12	12	9	43.6	43.6	31	47.293	0	130.09	3016600000	37	Q96LW9;C9JPM5;Q96LW9-2;C9JAI0;C9J6S7;C9JIC2;C9IYT1;C9J423;C9JHB1;C9JBH3;C9JUE1;C9J1X2;C9JH14;Q9BRR0-2;Q5JNZ3	Q96LW9;C9JPM5;Q96LW9-2	22.1506	21.857	22.8596	24.5869	24.2919	23.3325	24.1426	24.5151	24.7125	23.0275	21.9573	21.8692	29.2651	28.732
tr|H7C4J9|H7C4J9_HUMAN TSC22 domain family protein 1 (Fragment) OS=Homo sapiens OX=9606 GN=TSC22D1 PE=1 SV=1		TSC22D1	+	3.44742	0.00206623	-3.55843			0.868059	0.0575272	0.672432			NaN	1	0			NaN	1	0		3	1	1	45	16.8	16.8	15.212	0	37.704	352310000	20	H7C4J9	H7C4J9	24.822	24.845	25.7195	21.5991	21.7517	21.3604	26.1692	25.4549	25.7798	21.5489	21.5276	22.1455	21.5567	21.5576
sp|P07099|HYEP_HUMAN Epoxide hydrolase 1 OS=Homo sapiens OX=9606 GN=EPHX1 PE=1 SV=1	Epoxide hydrolase 1	EPHX1		0.00848878	0.988315	-0.0222117		+	2.9757	0.00120556	5.0074	+	+	2.26268	0.0388818	-0.671591		+	2.81343	0.000247748	-1.95442		28	28	28	64	64	64	52.948	0	323.31	21046000000	450	P07099;B1AQP9;B1AQP8	P07099	23.3097	23.6153	25.1871	25.2228	23.747	23.0755	29.1231	28.8464	29.1647	30.6742	30.8602	30.8055	30.1556	29.8989
tr|I3L2R5|I3L2R5_HUMAN CTD nuclear envelope phosphatase 1 OS=Homo sapiens OX=9606 GN=CTDNEP1 PE=1 SV=1;tr|I3L1D9|I3L1D9_HUMAN CTD nuclear envelope phosphatase 1 (Fragment) OS=Homo sapiens OX=9606 GN=CTDNEP1 PE=1 SV=1;tr|I3L3K5|I3L3K5_HUMAN CTD nuclear enve	CTD nuclear envelope phosphatase 1	CTDNEP1		NaN	1	0			NaN	1	0		+	2.81879	0.0146667	-2.04121		+	2.8864	0	-2.15489		3	3	3	40.5	40.5	40.5	12.667	0.0063677	2.2967	130670000	4	I3L2R5;I3L1D9;I3L3K5;I3L4B2;O95476	I3L2R5;I3L1D9;I3L3K5;I3L4B2;O95476	22.4333	21.4432	21.85	23.1706	21.4263	21.863	21.7561	21.1893	20.9043	24.1288	24.1825	24.1168	21.7429	21.9459
tr|I3L1P8|I3L1P8_HUMAN Mitochondrial 2-oxoglutarate/malate carrier protein (Fragment) OS=Homo sapiens OX=9606 GN=SLC25A11 PE=1 SV=1;sp|Q02978|M2OM_HUMAN Mitochondrial 2-oxoglutarate/malate carrier protein OS=Homo sapiens OX=9606 GN=SLC25A11 PE=1 SV=3;sp|Q0	Mitochondrial 2-oxoglutarate/malate carrier protein	SLC25A11		NaN	1	0			0.891049	0.0847427	0.408971			0.103328	0.895106	-0.121583		+	1.28851	0.00797848	-1.18268		4	4	4	15.9	15.9	15.9	32.182	0	42.899	362840000	22	I3L1P8;Q02978;Q02978-2	I3L1P8;Q02978;Q02978-2	22.6754	22.7555	22.8676	22.6291	21.9999	22.759	23.1407	23.5489	22.8358	24.6322	24.4628	24.422	24.0859	23.8559
sp|Q9Y2A4|ZN443_HUMAN Zinc finger protein 443 OS=Homo sapiens OX=9606 GN=ZNF443 PE=2 SV=2	Zinc finger protein 443	ZNF443	+	1.65765	0.026238	1.76318	+	+	2.91647	0.00114202	4.83495	+	+	2.39519	0.0136981	3.49742	+	+	3.88546	0	5.18177	+	17	16	1	37.4	29.2	1.5	77.515	0	284.06	3153400000	99	Q9Y2A4	Q9Y2A4	23.2377	21.9702	21.8966	24.4567	24.2068	23.7304	26.4122	27.6914	27.5057	22.6046	21.5612	21.9902	26.0814	26.0267
sp|Q96L73-2|NSD1_HUMAN Isoform 2 of Histone-lysine N-methyltransferase, H3 lysine-36 specific OS=Homo sapiens OX=9606 GN=NSD1;sp|Q96L73|NSD1_HUMAN Histone-lysine N-methyltransferase, H3 lysine-36 specific OS=Homo sapiens OX=9606 GN=NSD1 PE=1 SV=1;sp|Q96L73	Histone-lysine N-methyltransferase, H3 lysine-36 and H4 lysine-20 specific	NSD1	+	2.78231	0.00493525	1.71791	+	+	5.19618	0	6.93658	+		1.15989	0.190987	0.457427		+	6.64195	0	5.2672	+	40	40	40	26.5	26.5	26.5	267.34	0	323.31	5438800000	166	Q96L73-2;Q96L73;Q96L73-3;D6RA58;D6RBV9;D6RE14;D6RA90;H7BYB0;D6RBP3	Q96L73-2;Q96L73;Q96L73-3	22.6404	21.9216	22.2287	23.8478	24.1576	23.939	29.0421	29.299	29.2593	22.0056	21.9037	22.0459	22.3906	22.7779
sp|P17014|ZNF12_HUMAN Zinc finger protein 12 OS=Homo sapiens OX=9606 GN=ZNF12 PE=1 SV=3;sp|P17014-5|ZNF12_HUMAN Isoform 5 of Zinc finger protein 12 OS=Homo sapiens OX=9606 GN=ZNF12;sp|P17014-4|ZNF12_HUMAN Isoform 4 of Zinc finger protein 12 OS=Homo sapiens	Zinc finger protein 12	ZNF12	+	2.87862	0.00441221	1.71497	+	+	3.04381	0.00105121	2.55095	+		1.13276	0.103565	1.21011		+	2.02416	0.00108108	2.06157	+	38	37	29	63.3	62	46.5	81.201	0	323.31	9130700000	302	P17014;P17014-5;P17014-4;P17014-3;P17014-2;H9KV98	P17014;P17014-5;P17014-4;P17014-3;P17014-2	26.8921	26.4704	27.1732	28.6901	28.4991	28.4915	28.9885	29.5973	29.6028	24.8025	25.5173	26.2561	27.036	26.9866
sp|P62277|RS13_HUMAN 40S ribosomal protein S13 OS=Homo sapiens OX=9606 GN=RPS13 PE=1 SV=2;tr|J3KMX5|J3KMX5_HUMAN 40S ribosomal protein S13 OS=Homo sapiens OX=9606 GN=RPS13 PE=1 SV=1	40S ribosomal protein S13	RPS13		0.309845	0.567289	-0.785337			0.614591	0.105164	1.06727			0.459076	0.440794	1.17946		+	1.85808	0.00151033	2.82918	+	4	4	4	31.1	31.1	31.1	17.222	0	11.464	394690000	13	P62277;J3KMX5;E9PS50	P62277;J3KMX5	24.6242	22.4024	22.2103	22.1672	23.5389	21.1748	24.321	24.0285	24.0892	21.7293	20.5353	22.7874	24.0256	23.4686
sp|Q8NCD3|HJURP_HUMAN Holliday junction recognition protein OS=Homo sapiens OX=9606 GN=HJURP PE=1 SV=2;sp|Q8NCD3-2|HJURP_HUMAN Isoform 2 of Holliday junction recognition protein OS=Homo sapiens OX=9606 GN=HJURP;sp|Q8NCD3-3|HJURP_HUMAN Isoform 3 of Holliday	Holliday junction recognition protein	HJURP	+	1.81426	0.0219027	1.69535	+	+	4.26922	0	7.21562	+		NaN	1	0		+	4.48725	0	8.33296	+	35	35	35	59.8	59.8	59.8	83.538	0	323.31	23693000000	219	Q8NCD3;Q8NCD3-2;Q8NCD3-3;C9JWC4;H7C3V8;H7C0I6;F8WCV1	Q8NCD3;Q8NCD3-2;Q8NCD3-3;C9JWC4	22.4583	21.3977	22.684	23.6863	24.1257	23.8139	29.4252	29.3828	29.3789	22.3307	22.7931	21.7284	21.0817	22.9521
sp|P08238|HS90B_HUMAN Heat shock protein HSP 90-beta OS=Homo sapiens OX=9606 GN=HSP90AB1 PE=1 SV=4	Heat shock protein HSP 90-beta	HSP90AB1	+	2.54286	0.00797351	1.6608	+	+	3.10962	0.00106849	2.39782	+		0.950218	0.134064	1.74875		+	5.3384	0	2.19782	+	28	28	16	41.9	41.9	25.3	83.263	0	323.31	15730000000	284	P08238;Q58FF7	P08238	26.6129	25.8489	26.6116	28.0376	27.9884	28.0298	28.6418	28.8074	28.8177	27.0959	26.9926	27.1953	29.8013	29.5998
tr|A0A0A0MRA5|A0A0A0MRA5_HUMAN Heterogeneous nuclear ribonucleoprotein U-like protein 1 OS=Homo sapiens OX=9606 GN=HNRNPUL1 PE=1 SV=1;tr|B7Z4B8|B7Z4B8_HUMAN Heterogeneous nuclear ribonucleoprotein U-like protein 1 OS=Homo sapiens OX=9606 GN=HNRNPUL1 PE=1 S	Heterogeneous nuclear ribonucleoprotein U-like protein 1	HNRNPUL1	+	2.92779	0.00431343	1.56123	+	+	2.69759	0.00146039	2.15595	+		1.14691	0.0717764	4.94049		+	2.20079	0.000326044	5.86	+	21	21	21	39.7	39.7	39.7	85.939	0	181.74	7091000000	149	A0A0A0MRA5;B7Z4B8;Q9BUJ2-4;Q9BUJ2-2;Q9BUJ2;M0R3F1;Q9BUJ2-3;M0QYZ0;M0QYI8;M0QZV6;M0R0K8;M0R203;M0QYM5	A0A0A0MRA5;B7Z4B8;Q9BUJ2-4;Q9BUJ2-2;Q9BUJ2;M0R3F1;Q9BUJ2-3;M0QYZ0	25.5348	25.0155	25.4851	26.7242	27.0218	26.9732	27.1297	27.3938	27.9799	21.6489	20.8804	24.5194	29.1056	28.8643
sp|Q04446|GLGB_HUMAN 1,4-alpha-glucan-branching enzyme OS=Homo sapiens OX=9606 GN=GBE1 PE=1 SV=3;tr|E9PGM4|E9PGM4_HUMAN 1,4-alpha-glucan branching enzyme OS=Homo sapiens OX=9606 GN=GBE1 PE=1 SV=1	1,4-alpha-glucan-branching enzyme	GBE1		0.0340149	0.957185	0.128255		+	2.53471	0.00135484	4.92471	+		0.66856	0.257853	-1.78889			0.50241	0.357001	0.22707		16	16	16	34.8	34.8	34.8	80.473	0	109.97	2275700000	77	Q04446;E9PGM4	Q04446;E9PGM4	21.9661	22.2247	24.0523	20.7009	23.7918	24.1351	28.4252	27.1803	27.4117	25.5024	26.0702	25.6695	25.2277	25.0919
tr|C9JXB8|C9JXB8_HUMAN 60S ribosomal protein L24 OS=Homo sapiens OX=9606 GN=RPL24 PE=1 SV=1;tr|C9JNW5|C9JNW5_HUMAN 60S ribosomal protein L24 OS=Homo sapiens OX=9606 GN=RPL24 PE=1 SV=1;sp|P83731|RL24_HUMAN 60S ribosomal protein L24 OS=Homo sapiens OX=9606 G	60S ribosomal protein L24	RPL24	+	1.39301	0.0378559	1.51873	+	+	1.37411	0.0083892	1.72126	+		0.201789	0.74826	-0.566725		+	1.94622	0.00108731	2.90353	+	3	3	3	24.8	24.8	24.8	14.369	0	13.428	1617300000	28	C9JXB8;C9JNW5;P83731	C9JXB8;C9JNW5;P83731	22.9794	22.5273	24.1545	24.8449	24.9345	24.438	24.4821	25.5742	24.7688	22.5634	24.0962	23.7383	24.7052	21.3418
tr|J3KNZ9|J3KNZ9_HUMAN Probable fibrosin-1 OS=Homo sapiens OX=9606 GN=FBRS PE=1 SV=1;sp|Q9HAH7|FBRS_HUMAN Probable fibrosin-1 OS=Homo sapiens OX=9606 GN=FBRS PE=1 SV=3;sp|Q9HAH7-1|FBRS_HUMAN Isoform 1 of Probable fibrosin-1 OS=Homo sapiens OX=9606 GN=FBRS	Probable fibrosin-1	FBRS	+	1.54015	0.046585	-0.75692			0.823265	0.101408	-0.397045			0.472706	0.506286	-0.434245		+	2.29026	0.00273375	-0.628047		21	21	21	34.8	34.8	34.8	103.77	0	323.31	27673000000	519	J3KNZ9;Q9HAH7;Q9HAH7-1;H3BRE6	J3KNZ9;Q9HAH7;Q9HAH7-1	29.3829	29.8639	30.1446	29.0462	29.1124	28.962	29.3763	29.4434	29.3804	30.5152	30.6805	30.3376	29.5837	29.8099
sp|Q5SSJ5|HP1B3_HUMAN Heterochromatin protein 1-binding protein 3 OS=Homo sapiens OX=9606 GN=HP1BP3 PE=1 SV=1;tr|B0QZK4|B0QZK4_HUMAN Heterochromatin protein 1-binding protein 3 (Fragment) OS=Homo sapiens OX=9606 GN=HP1BP3 PE=1 SV=1;sp|Q5SSJ5-2|HP1B3_HUMAN	Heterochromatin protein 1-binding protein 3	HP1BP3	+	1.41168	0.0381266	1.39771	+	+	2.34639	0.00144597	3.3347	+	+	2.24629	0.0145714	2.50647	+	+	3.09666	0	3.23429	+	12	12	12	24.8	24.8	24.8	61.206	0	158.65	1749300000	64	Q5SSJ5;B0QZK4;Q5SSJ5-2;Q5SSJ5-3;Q5SWC8;B0QZK9;B0QZK8;Q5SSJ5-5	Q5SSJ5;B0QZK4;Q5SSJ5-2;Q5SSJ5-3;Q5SWC8	23.06	24.5991	23.6425	25.223	25.3139	24.9579	26.8375	26.6435	27.8248	21.8344	22.8682	21.9298	25.2139	24.8345
sp|Q8WUQ7|CATIN_HUMAN Cactin OS=Homo sapiens OX=9606 GN=CACTIN PE=1 SV=3;sp|Q8WUQ7-2|CATIN_HUMAN Isoform 2 of Cactin OS=Homo sapiens OX=9606 GN=CACTIN	Cactin	CACTIN	+	2.73942	0.00783729	1.38441	+	+	1.16206	0.0198209	0.905932	+		1.04987	0.0977209	2.54097		+	2.97147	0	2.25643	+	8	8	8	13.2	13.2	13.2	88.701	0	42.874	519350000	15	Q8WUQ7;Q8WUQ7-2;K7ENY9;K7EIU6;K7EMQ0;K7EQE3	Q8WUQ7;Q8WUQ7-2	22.3357	22.8731	22.2881	23.9146	23.8592	23.8764	23.8591	22.7998	23.5559	22.2887	21.9609	21.4244	25.4061	25.6709
tr|J3KPD3|J3KPD3_HUMAN RNA binding motif protein 7, isoform CRA_c OS=Homo sapiens OX=9606 GN=RBM7 PE=1 SV=1;tr|F5GXV8|F5GXV8_HUMAN RNA-binding protein 7 OS=Homo sapiens OX=9606 GN=RBM7 PE=1 SV=1;tr|I3L521|I3L521_HUMAN RRM domain-containing protein (Fragmen		RBM7		0.828023	0.198044	-0.520366		+	2.74679	0.00146195	-1.98013			0.0870551	0.90101	0.15487		+	2.09998	0.00872727	-0.388578		11	11	1	62.5	62.5	12	30.59	0	296.89	3335200000	146	J3KPD3;F5GXV8;I3L521;F5H606;G3V1T9;F5H674	J3KPD3;F5GXV8;I3L521	27.2515	28.1	27.5496	27.2579	27.2726	26.8096	25.8506	25.5899	25.5203	27.3032	27.164	27.2226	26.7424	26.7667
sp|Q15363|TMED2_HUMAN Transmembrane emp24 domain-containing protein 2 OS=Homo sapiens OX=9606 GN=TMED2 PE=1 SV=1;tr|F5GX39|F5GX39_HUMAN Transmembrane emp24 domain-containing protein 2 OS=Homo sapiens OX=9606 GN=TMED2 PE=1 SV=1;tr|E7EQ72|E7EQ72_HUMAN Transm	Transmembrane emp24 domain-containing protein 2	TMED2		NaN	1	0		+	6.42818	0	4.87044	+		0.630499	0.349675	-0.599223		+	2.03646	0.00150316	-1.55993		6	6	6	30.8	30.8	30.8	22.761	0	107.54	3582700000	85	Q15363;F5GX39;E7EQ72	Q15363;F5GX39;E7EQ72	21.9443	22.0546	21.8114	21.8764	22.7953	22.0952	26.8497	26.8257	26.7462	28.1466	27.881	28.4776	27.7821	26.8097
sp|Q8NFJ5|RAI3_HUMAN Retinoic acid-induced protein 3 OS=Homo sapiens OX=9606 GN=GPRC5A PE=1 SV=2;tr|A0A3B3ITN8|A0A3B3ITN8_HUMAN Retinoic acid-induced protein 3 OS=Homo sapiens OX=9606 GN=GPRC5A PE=1 SV=1	Retinoic acid-induced protein 3	GPRC5A		NaN	1	0		+	4.26587	0.00065641	4.86926	+		0.0600953	0.955122	0.0207526		+	0.739311	0.0433935	-1.62868		5	5	5	21.6	21.6	21.6	40.251	0	49.108	1310100000	35	Q8NFJ5;A0A3B3ITN8;F5GWG3	Q8NFJ5;A0A3B3ITN8	21.6235	21.1902	20.7743	21.7472	22.432	22.5726	26.2827	25.9426	25.9704	26.1826	25.9913	26.092	26.2602	25.9045
sp|P52597|HNRPF_HUMAN Heterogeneous nuclear ribonucleoprotein F OS=Homo sapiens OX=9606 GN=HNRNPF PE=1 SV=3;tr|A0A1B0GW42|A0A1B0GW42_HUMAN Heterogeneous nuclear ribonucleoprotein F (Fragment) OS=Homo sapiens OX=9606 GN=HNRNPF PE=1 SV=1	Heterogeneous nuclear ribonucleoprotein F;Heterogeneous nuclear ribonucleoprotein F, N-terminally processed	HNRNPF	+	1.26442	0.0498301	1.37107	+	+	1.44764	0.00839447	1.30147	+		0.864117	0.190754	1.16511		+	2.21791	0.000588128	2.51415	+	6	5	5	27.5	23.4	23.4	45.671	0	109.3	879270000	28	P52597;A0A1B0GW42	P52597;A0A1B0GW42	21.8973	22.2208	22.7034	24.3549	23.7736	22.8061	23.9431	22.884	23.8987	22.8824	22.401	23.8245	25.0796	24.0389
sp|Q15631|TSN_HUMAN Translin OS=Homo sapiens OX=9606 GN=TSN PE=1 SV=1;tr|E9PGT1|E9PGT1_HUMAN Component 3 of promoter of RISC OS=Homo sapiens OX=9606 GN=TSN PE=1 SV=1;tr|H7C1D4|H7C1D4_HUMAN Component 3 of promoter of RISC (Fragment) OS=Homo sapiens OX=9606	Translin	TSN		0.271939	0.621939	-0.996075		+	1.66985	0.00391765	4.8551	+	+	2.03776	0.0362874	-0.889165		+	2.10603	0.00153101	-1.08089		8	8	8	58.3	58.3	58.3	26.183	0	323.31	7443800000	147	Q15631;E9PGT1;H7C1D4;Q15631-2;A0A0J9YVW2	Q15631;E9PGT1;H7C1D4	21.5164	22.3021	25.7984	21.6225	23.5078	21.4983	28.1696	28.2177	27.795	28.5631	28.9108	29.0205	28.1988	27.822
sp|P31943|HNRH1_HUMAN Heterogeneous nuclear ribonucleoprotein H OS=Homo sapiens OX=9606 GN=HNRNPH1 PE=1 SV=4;tr|G8JLB6|G8JLB6_HUMAN Heterogeneous nuclear ribonucleoprotein H OS=Homo sapiens OX=9606 GN=HNRNPH1 PE=1 SV=1;tr|E9PCY7|E9PCY7_HUMAN Heterogeneous	Heterogeneous nuclear ribonucleoprotein H;Heterogeneous nuclear ribonucleoprotein H, N-terminally processed	HNRNPH1	+	2.99009	0.00511888	1.23728	+	+	4.52452	0.000932249	1.9467	+		1.23104	0.0791955	1.4598		+	3.66918	0	2.42	+	10	10	6	27.2	27.2	13.1	49.229	0	307.56	3423200000	87	P31943;G8JLB6;E9PCY7;D6RBM0;D6RIU0;D6R9T0;D6RIH9;D6RJ04;D6RDU3;D6RFM3;D6RIT2;E5RGV0;D6RAM1;E7EQJ0;E7EN40;D6RDL0;D6R9D3;D6RF17;E5RGH4;H0YB39;H0YAQ2;H0YBG7;H0YBD7;E5RJ94	P31943;G8JLB6;E9PCY7;D6RBM0;D6RIU0;D6R9T0;D6RIH9;D6RJ04;D6RDU3;D6RFM3;D6RIT2;E5RGV0;D6RAM1;E7EQJ0;E7EN40;D6RDL0	25.6045	25.5762	25.6685	26.9142	27.0636	26.5832	27.6859	27.6114	27.3921	24.7039	24.278	24.5855	26.7549	26.2551
sp|A2AJT9-2|BCLA3_HUMAN Isoform 2 of BCLAF1 and THRAP3 family member 3 OS=Homo sapiens OX=9606 GN=BCLAF3;sp|A2AJT9|BCLA3_HUMAN BCLAF1 and THRAP3 family member 3 OS=Homo sapiens OX=9606 GN=BCLAF3 PE=1 SV=1;sp|A2AJT9-3|BCLA3_HUMAN Isoform 3 of BCLAF1 and THR	Uncharacterized protein CXorf23	CXorf23	+	2.84149	0.00778451	1.22777	+	+	1.42297	0.0222546	0.488098	+	+	1.59712	0.0393811	2.21981	+	+	3.5144	0	3.08661	+	16	16	16	30.1	30.1	30.1	80.394	0	82.523	3148600000	115	A2AJT9-2;A2AJT9;A2AJT9-3;H7BXX2;F2Z385	A2AJT9-2;A2AJT9;A2AJT9-3	26.6625	27.1044	26.9785	28.1741	28.2732	27.9813	27.477	27.5097	27.223	23.7835	23.7551	24.0916	26.8434	26.598
sp|P61978-3|HNRPK_HUMAN Isoform 3 of Heterogeneous nuclear ribonucleoprotein K OS=Homo sapiens OX=9606 GN=HNRNPK;sp|P61978|HNRPK_HUMAN Heterogeneous nuclear ribonucleoprotein K OS=Homo sapiens OX=9606 GN=HNRNPK PE=1 SV=1;sp|P61978-2|HNRPK_HUMAN Isoform 2 o	Heterogeneous nuclear ribonucleoprotein K	HNRNPK	+	2.70585	0.00876923	1.20283	+	+	2.1949	0.0103843	0.438857	+	+	2.29931	0.0194229	1.39663	+	+	2.785	0.000404624	1.1953	+	13	13	13	38.2	38.2	38.2	48.562	0	117.46	3354900000	141	P61978-3;P61978;P61978-2;Q5T6W2;S4R457;S4R359	P61978-3;P61978;P61978-2;Q5T6W2	26.3791	26.3237	26.1084	27.696	27.523	27.2007	26.7374	26.6861	26.7044	25.5907	25.4881	25.8812	27.4535	27.0014
tr|H7C2Q8|H7C2Q8_HUMAN EBNA1 binding protein 2, isoform CRA_d OS=Homo sapiens OX=9606 GN=EBNA1BP2 PE=1 SV=1;sp|Q99848|EBP2_HUMAN Probable rRNA-processing protein EBP2 OS=Homo sapiens OX=9606 GN=EBNA1BP2 PE=1 SV=2	Probable rRNA-processing protein EBP2	EBNA1BP2	+	1.6321	0.0325566	1.20062	+	+	3.51674	0.00108939	1.6024	+		0.356551	0.558685	0.996284		+	1.24388	0.0056075	3.13485	+	10	10	10	30.7	30.7	30.7	40.684	0	23.271	2100200000	41	H7C2Q8;Q99848	H7C2Q8;Q99848	24.878	25.187	24.8315	26.6558	26.2701	25.5724	26.5891	26.6934	26.4212	21.1842	23.3863	25.1122	24.5665	24.3605
tr|J3QLB2|J3QLB2_HUMAN Zinc transporter ZIP11 (Fragment) OS=Homo sapiens OX=9606 GN=SLC39A11 PE=1 SV=8;tr|J3KRX2|J3KRX2_HUMAN Zinc transporter ZIP11 (Fragment) OS=Homo sapiens OX=9606 GN=SLC39A11 PE=1 SV=1;tr|J3QS49|J3QS49_HUMAN Zinc transporter ZIP11 OS=H	Zinc transporter ZIP11	SLC39A11		NaN	1	0			0.154351	0.803891	-0.317666			0.445074	0.646373	0.168509		+	2.8986	0.000340956	-1.33451		3	3	3	19.5	19.5	19.5	19.293	0	17.882	449450000	24	J3QLB2;J3KRX2;J3QS49;Q8N1S5-2;Q8N1S5;J3QRN3;J3QLA9;A0A0J9YXZ0;A0A0J9YXE3;J3QQP1;A0A0J9YXX3;J3KS66	J3QLB2;J3KRX2;J3QS49;Q8N1S5-2;Q8N1S5;J3QRN3;J3QLA9	21.508	21.7429	23.0822	21.652	21.8611	22.3781	21.5929	20.8812	22.9059	25.0498	24.6133	25.1263	25.1098	25.0404
sp|P06748-2|NPM_HUMAN Isoform 2 of Nucleophosmin OS=Homo sapiens OX=9606 GN=NPM1;sp|P06748|NPM_HUMAN Nucleophosmin OS=Homo sapiens OX=9606 GN=NPM1 PE=1 SV=2;sp|P06748-3|NPM_HUMAN Isoform 3 of Nucleophosmin OS=Homo sapiens OX=9606 GN=NPM1	Nucleophosmin	NPM1	+	2.55071	0.0130147	1.01029	+	+	2.29303	0.00458523	0.677313	+		1.06527	0.102386	1.82287		+	3.39101	0	2.38723	+	11	11	11	46	46	46	29.464	0	323.31	14192000000	252	P06748-2;P06748;P06748-3;E5RGW4;E5RI98	P06748-2;P06748;P06748-3	28.2474	28.4938	28.1057	29.3918	29.0833	29.4026	28.8758	28.9781	29.0248	26.7425	26.2435	26.9753	29.2425	29.2603
sp|Q8N511|TM199_HUMAN Transmembrane protein 199 OS=Homo sapiens OX=9606 GN=TMEM199 PE=1 SV=1;tr|J3KS81|J3KS81_HUMAN Transmembrane protein 199 OS=Homo sapiens OX=9606 GN=TMEM199 PE=1 SV=1;tr|J3KRW7|J3KRW7_HUMAN Transmembrane protein 199 OS=Homo sapiens OX=9	Transmembrane protein 199	TMEM199		NaN	1	0			NaN	1	0			0.724455	0.254917	-1.05687			0.236838	0.737291	-0.181151		2	2	2	18.3	18.3	18.3	23.13	0	15.071	195800000	10	Q8N511;J3KS81;J3KRW7	Q8N511;J3KS81;J3KRW7	21.4549	21.4214	20.9679	22.2065	22.6641	22.2344	21.6473	22.1748	21.4678	23.2351	23.7794	22.7554	21.2271	22.0816
sp|O75820-3|ZN189_HUMAN Isoform 3 of Zinc finger protein 189 OS=Homo sapiens OX=9606 GN=ZNF189;sp|O75820-4|ZN189_HUMAN Isoform 4 of Zinc finger protein 189 OS=Homo sapiens OX=9606 GN=ZNF189;sp|O75820-2|ZN189_HUMAN Isoform 2 of Zinc finger protein 189 OS=Ho	Zinc finger protein 189	ZNF189	+	1.57049	0.0367084	0.981415	+	+	2.31287	0.00223012	1.6311	+	+	2.44411	0.0150667	2.47403	+	+	2.80405	0	2.84294	+	20	20	18	39.9	39.9	36.2	62.061	0	40.153	1621500000	61	O75820-3;O75820-4;O75820-2;O75820	O75820-3;O75820-4;O75820-2;O75820	25.8481	25.3005	25.8221	27.0642	26.5525	26.2982	26.944	27.2016	27.7184	22.3107	21.2131	22.317	24.3258	24.1882
sp|Q2TB10|ZN800_HUMAN Zinc finger protein 800 OS=Homo sapiens OX=9606 GN=ZNF800 PE=1 SV=1;tr|A0A087WXB4|A0A087WXB4_HUMAN Zinc finger protein 800 OS=Homo sapiens OX=9606 GN=ZNF800 PE=1 SV=1	Zinc finger protein 800	ZNF800	+	2.07701	0.0263518	0.786989	+	+	1.41888	0.0108658	0.994148	+	+	2.26989	0.0148437	3.51188	+	+	2.98659	0	3.19883	+	14	14	14	24.4	24.4	24.4	75.235	0	196.81	3890400000	124	Q2TB10;A0A087WXB4;C9JHX9;C9K0M9;C9JLY3	Q2TB10;A0A087WXB4	25.5871	25.6087	26.0267	26.3776	26.5737	26.6321	26.9039	26.1643	27.1367	24.7494	23.8871	23.642	28.1972	28.1002
sp|P14618|KPYM_HUMAN Pyruvate kinase PKM OS=Homo sapiens OX=9606 GN=PKM PE=1 SV=4;tr|B4DNK4|B4DNK4_HUMAN Pyruvate kinase OS=Homo sapiens OX=9606 GN=PKM PE=1 SV=1;sp|P14618-3|KPYM_HUMAN Isoform 3 of Pyruvate kinase PKM OS=Homo sapiens OX=9606 GN=PKM;sp|P146	Pyruvate kinase PKM;Pyruvate kinase	PKM	+	1.54826	0.0445253	0.783042	+	+	1.79977	0.00490859	1.17579	+		0.738152	0.225993	1.93793		+	1.17352	0.00721697	2.7853	+	19	19	19	51.8	51.8	51.8	57.936	0	120.46	2592800000	84	P14618;B4DNK4;P14618-3;P14618-2;H3BTN5;H3BQ34;H3BR70;H3BUW1;H3BTJ2;H3BT25;H3BU13;P30613-2;P30613	P14618;B4DNK4;P14618-3;P14618-2;H3BTN5;H3BQ34	26.0807	25.8114	25.4151	26.3465	26.5167	26.7932	27.3826	26.6986	26.7534	24.5411	21.7535	25.4361	25.1163	25.7068
tr|B7ZLQ5|B7ZLQ5_HUMAN Probable global transcription activator SNF2L1 OS=Homo sapiens OX=9606 GN=SMARCA1 PE=1 SV=1;sp|P28370|SMCA1_HUMAN Probable global transcription activator SNF2L1 OS=Homo sapiens OX=9606 GN=SMARCA1 PE=1 SV=2;tr|A0A0A0MRP6|A0A0A0MRP6_HU	Probable global transcription activator SNF2L1	SMARCA1	+	1.55129	0.045515	0.766675	+	+	3.13766	0.0012093	3.26005	+		0.664666	0.267356	1.45815		+	4.29079	0	5.034	+	35	35	23	35.2	35.2	24.4	124.33	0	154.75	7620600000	152	B7ZLQ5;P28370;A0A0A0MRP6;P28370-2	B7ZLQ5;P28370;A0A0A0MRP6;P28370-2	24.4651	24.3374	24.2002	25.4825	24.7407	25.0796	27.612	26.9965	28.1744	24.037	23.5767	24.2422	26.2875	26.479
sp|Q9NYW8|RBAK_HUMAN RB-associated KRAB zinc finger protein OS=Homo sapiens OX=9606 GN=RBAK PE=1 SV=1	RB-associated KRAB zinc finger protein	RBAK	+	2.17109	0.0408017	0.458497	+	+	2.84913	0.00181045	1.0182	+		1.59602	0.0772105	0.629299		+	4.37329	0	2.26912	+	31	28	24	60.2	55.6	53.2	82.994	0	323.31	10195000000	244	Q9NYW8;I3L0D1;A0A0A6YYG8;Q9NYW8-2;Q13401-3;Q13401;Q13401-2	Q9NYW8	27.847	27.6668	27.928	28.2755	28.194	28.3477	28.6285	28.9711	28.8967	26.4646	26.4405	26.5083	27.4303	27.0593
sp|P11388|TOP2A_HUMAN DNA topoisomerase 2-alpha OS=Homo sapiens OX=9606 GN=TOP2A PE=1 SV=3;sp|P11388-2|TOP2A_HUMAN Isoform 2 of DNA topoisomerase 2-alpha OS=Homo sapiens OX=9606 GN=TOP2A;sp|P11388-3|TOP2A_HUMAN Isoform 3 of DNA topoisomerase 2-alpha OS=Hom	DNA topoisomerase 2-alpha	TOP2A		1.04588	0.0609517	4.46672		+	1.54247	0.00420085	6.70223	+	+	1.40617	0.0436373	6.49122	+	+	3.3902	0	10.3509	+	102	83	83	62.6	54.5	54.5	174.38	0	323.31	169980000000	1126	P11388;P11388-2;P11388-3;P11388-4;J3KTB7	P11388;P11388-2;P11388-3;P11388-4	26.8253	27.7927	21.361	30.0121	29.7973	29.5698	32.1287	32.0308	31.9262	21.6892	22.5447	24.8669	31.4341	31.4759
tr|A0A494C0Z6|A0A494C0Z6_HUMAN Transcription factor Sp3 (Fragment) OS=Homo sapiens OX=9606 GN=SP3 PE=1 SV=1;tr|H0Y6K5|H0Y6K5_HUMAN Transcription factor Sp3 OS=Homo sapiens OX=9606 GN=SP3 PE=1 SV=1;tr|A0A494C070|A0A494C070_HUMAN Transcription factor Sp3 OS=	Transcription factor Sp3	SP3		0.97191	0.0745296	3.9107		+	4.26569	0	6.19118	+	+	2.60662	0.0129474	3.93074	+	+	3.28687	0	4.59212	+	5	5	5	8.6	8.6	8.6	65.951	0	184.98	2715800000	58	A0A494C0Z6;H0Y6K5;A0A494C070;H0Y7L6;Q02447-4;Q02447-3;Q02447-5;Q02447-6;Q02447-2;Q02447;A0A494C1G8	A0A494C0Z6;H0Y6K5;A0A494C070;H0Y7L6;Q02447-4;Q02447-3;Q02447-5;Q02447-6;Q02447-2;Q02447;A0A494C1G8	22.1116	21.4892	21.0858	27.4473	21.7525	27.2188	27.5008	27.6943	28.065	21.1061	21.701	22.5966	26.4072	25.7172
tr|J3QR07|J3QR07_HUMAN YTH domain-containing protein 1 OS=Homo sapiens OX=9606 GN=YTHDC1 PE=1 SV=1;sp|Q96MU7-2|YTDC1_HUMAN Isoform 2 of YTH domain-containing protein 1 OS=Homo sapiens OX=9606 GN=YTHDC1;sp|Q96MU7|YTDC1_HUMAN YTH domain-containing protein 1	YTH domain-containing protein 1	YTHDC1		1.30747	0.082385	-0.612368		+	4.20616	0.00115112	-1.01694			0.570715	0.447168	0.386847			0.261687	0.835568	-0.0613925		17	17	17	29.7	29.7	29.7	85.586	0	67.184	5761000000	194	J3QR07;Q96MU7-2;Q96MU7;J3KS01;J3KRG5	J3QR07;Q96MU7-2;Q96MU7	28.6062	28.5566	28.4909	28.2148	28.0906	27.5111	27.4627	27.5161	27.624	27.4499	27.5738	27.4998	27.4602	27.7552
tr|A6NHB5|A6NHB5_HUMAN Zinc finger MYM-type protein 3 OS=Homo sapiens OX=9606 GN=ZMYM3 PE=1 SV=1;sp|Q14202|ZMYM3_HUMAN Zinc finger MYM-type protein 3 OS=Homo sapiens OX=9606 GN=ZMYM3 PE=1 SV=2;sp|Q14202-2|ZMYM3_HUMAN Isoform 2 of Zinc finger MYM-type prote	Zinc finger MYM-type protein 3	ZMYM3		0.896405	0.0978982	3.46511		+	1.68626	0.00374831	6.35846	+		0.972569	0.112814	2.97354		+	1.48332	0.00261962	4.446	+	35	35	35	42.4	42.4	42.4	152.6	0	323.31	8827600000	165	A6NHB5;Q14202;Q14202-2;A6NHN7;A6NL54;Q14202-3;A6NC58	A6NHB5;Q14202;Q14202-2;A6NHN7	20.8155	21.4983	26.1892	27.2216	26.5816	25.0951	29.6323	28.6674	29.2786	24.7804	21.3266	25.9451	27.2884	27.4079
sp|O75925|PIAS1_HUMAN E3 SUMO-protein ligase PIAS1 OS=Homo sapiens OX=9606 GN=PIAS1 PE=1 SV=2;sp|O75925-2|PIAS1_HUMAN Isoform 2 of E3 SUMO-protein ligase PIAS1 OS=Homo sapiens OX=9606 GN=PIAS1;sp|O75925-3|PIAS1_HUMAN Isoform 3 of E3 SUMO-protein ligase PIA	E3 SUMO-protein ligase PIAS1	PIAS1		1.02239	0.0673285	3.30994		+	2.224	0.00146906	7.97342	+	+	2.46768	0.0143256	5.55879	+	+	5.98859	0	9.29008	+	31	29	29	65.4	61.9	61.9	71.835	0	323.31	43744000000	323	O75925;O75925-2;O75925-3;H3BSI8;H3BUL7;H3BS65	O75925;O75925-2;O75925-3	20.7925	22.7549	25.9272	26.0371	26.406	26.9612	31.1277	31.0751	31.192	22.0108	22.1028	21.6127	28.765	27.8522
sp|Q14119|VEZF1_HUMAN Vascular endothelial zinc finger 1 OS=Homo sapiens OX=9606 GN=VEZF1 PE=1 SV=2;tr|J3QSH4|J3QSH4_HUMAN Vascular endothelial zinc finger 1 OS=Homo sapiens OX=9606 GN=VEZF1 PE=1 SV=1;tr|J9JIC7|J9JIC7_HUMAN Vascular endothelial zinc finger	Vascular endothelial zinc finger 1	VEZF1		0.0814548	0.924105	-0.0845089			0.614447	0.273752	-0.243916			0.0521991	0.947787	0.0604407			0.135806	0.855777	0.130412		7	5	5	18.6	15	15	56.931	0	8.6055	986220000	48	Q14119;J3QSH4;J9JIC7	Q14119;J3QSH4;J9JIC7	25.049	24.5207	24.6818	24.9826	25.0123	24.0031	24.3998	24.6759	24.444	24.7443	24.7927	25.0416	24.8646	24.2781
sp|P10646|TFPI1_HUMAN Tissue factor pathway inhibitor OS=Homo sapiens OX=9606 GN=TFPI PE=1 SV=1;tr|C9JKV3|C9JKV3_HUMAN Tissue factor pathway inhibitor (Fragment) OS=Homo sapiens OX=9606 GN=TFPI PE=1 SV=1;sp|P10646-2|TFPI1_HUMAN Isoform Beta of Tissue facto	Tissue factor pathway inhibitor	TFPI		NaN	1	0		+	3.56873	0.00113869	4.76718	+		NaN	1	0			0.059044	0.931587	-0.0979919		6	6	6	26.3	26.3	26.3	35.015	0	99.035	831320000	25	P10646;C9JKV3;P10646-2;C9JT76;C9JQ14	P10646;C9JKV3;P10646-2	21.7974	22.3157	22.8814	21.2005	22.0579	20.8226	26.7515	26.9835	27.561	22.1425	22.4331	23.3099	20.9635	21.1835
sp|Q9H0U4|RAB1B_HUMAN Ras-related protein Rab-1B OS=Homo sapiens OX=9606 GN=RAB1B PE=1 SV=1;tr|E9PLD0|E9PLD0_HUMAN Ras-related protein Rab-1B OS=Homo sapiens OX=9606 GN=RAB1B PE=1 SV=1	Ras-related protein Rab-1B	RAB1B		0.208095	0.733106	-0.839302		+	1.61304	0.00402855	4.74993	+		1.30949	0.141103	-0.496135			0.509558	0.352088	-0.225167		12	12	6	67.2	67.2	32.3	22.171	0	323.31	8695000000	160	Q9H0U4;E9PLD0;Q92928	Q9H0U4;E9PLD0	25.7332	21.9292	21.4927	22.1848	20.8594	23.593	27.8737	27.8543	27.6769	28.4096	28.5263	28.7431	28.2039	27.7674
tr|K7EID0|K7EID0_HUMAN Max-like protein X (Fragment) OS=Homo sapiens OX=9606 GN=MLX PE=1 SV=1;sp|Q9UH92-2|MLX_HUMAN Isoform Alpha of Max-like protein X OS=Homo sapiens OX=9606 GN=MLX;sp|Q9UH92-3|MLX_HUMAN Isoform Beta of Max-like protein X OS=Homo sapiens	Max-like protein X	MLX		NaN	1	0			NaN	1	0			NaN	1	0		+	3.00778	0	2.06194	+	2	2	2	13.7	13.7	13.7	27.977	0	8.2016	233400000	7	K7EID0;Q9UH92-2;Q9UH92-3;Q9UH92	K7EID0;Q9UH92-2;Q9UH92-3;Q9UH92	21.8881	21.7827	22.7481	21.8776	20.787	21.7064	22.5128	20.8002	21.9504	22.4133	21.794	21.9761	22.9162	23.2726
tr|K7EIE8|K7EIE8_HUMAN Methyl-CpG binding domain protein 3, isoform CRA_b OS=Homo sapiens OX=9606 GN=MBD3 PE=1 SV=1;sp|O95983-2|MBD3_HUMAN Isoform 2 of Methyl-CpG-binding domain protein 3 OS=Homo sapiens OX=9606 GN=MBD3;sp|O95983|MBD3_HUMAN Methyl-CpG-bind	Methyl-CpG-binding domain protein 3	MBD3		NaN	1	0		+	1.27055	0.0146853	0.987199	+		NaN	1	0			NaN	1	0		3	3	3	14.9	14.9	14.9	26.322	0	9.4581	85463000	8	K7EIE8;O95983-2;O95983;A0A087WT34;A0A087X1H1;A0A0A0MTS6	K7EIE8;O95983-2;O95983;A0A087WT34;A0A087X1H1;A0A0A0MTS6	22.2146	21.7042	22.7953	23.0259	23.1374	21.3816	23.5811	22.9725	23.1221	22.038	22.5028	21.2578	22.1662	22.1526
sp|Q04828|AK1C1_HUMAN Aldo-keto reductase family 1 member C1 OS=Homo sapiens OX=9606 GN=AKR1C1 PE=1 SV=1;tr|A6NHU4|A6NHU4_HUMAN Aldo-keto reductase family 1 member C1 OS=Homo sapiens OX=9606 GN=AKR1C1 PE=1 SV=1;tr|H0Y804|H0Y804_HUMAN Aldo-keto reductase fa	Aldo-keto reductase family 1 member C1	AKR1C1		NaN	1	0		+	4.73134	0	4.74482	+		NaN	1	0			NaN	1	0		8	8	3	40.2	40.2	11.5	36.788	0	21.186	662190000	22	Q04828;A6NHU4;H0Y804;S4R3Z2;A0A0A0MSS8;P42330;P17516;S4R3D5;P42330-2	Q04828;A6NHU4;H0Y804	21.8806	22.5406	22.1119	21.992	23.2669	22.1538	26.9606	26.9826	26.8243	21.824	20.5463	21.4123	21.7714	22.9535
tr|K7EIY8|K7EIY8_HUMAN Chromosome 18 open reading frame 37, isoform CRA_a OS=Homo sapiens OX=9606 GN=INO80C PE=1 SV=1;sp|Q6PI98|IN80C_HUMAN INO80 complex subunit C OS=Homo sapiens OX=9606 GN=INO80C PE=1 SV=1;sp|Q6PI98-4|IN80C_HUMAN Isoform 3 of INO80 compl	INO80 complex subunit C	INO80C		NaN	1	0			NaN	1	0			NaN	1	0		+	2.54578	0.000341311	2.21508	+	2	2	2	20.4	20.4	20.4	15.229	0.00062228	3.7711	229720000	4	K7EIY8;Q6PI98;Q6PI98-4;K7EKI6;K7EQ79;M0R3E2;Q6PI98-3	K7EIY8;Q6PI98;Q6PI98-4;K7EKI6;K7EQ79;M0R3E2;Q6PI98-3	22.4474	22.1852	20.5756	21.4851	22.4275	22.3259	20.7936	22.0584	21.7439	21.8284	22.3017	21.1604	21.7635	22.1364
sp|Q6P6C2-1|ALKB5_HUMAN Isoform 1 of RNA demethylase ALKBH5 OS=Homo sapiens OX=9606 GN=ALKBH5;sp|Q6P6C2|ALKB5_HUMAN RNA demethylase ALKBH5 OS=Homo sapiens OX=9606 GN=ALKBH5 PE=1 SV=2;sp|Q6P6C2-3|ALKB5_HUMAN Isoform 3 of RNA demethylase ALKBH5 OS=Homo sapie	RNA demethylase ALKBH5	ALKBH5		0.978586	0.07552	3.30928		+	4.70598	0	7.12467	+		0.75563	0.204371	2.96157		+	3.48691	0	6.04226	+	6	6	6	21.4	21.4	21.4	52.255	0	53.772	5967200000	36	Q6P6C2-1;Q6P6C2;Q6P6C2-3	Q6P6C2-1;Q6P6C2;Q6P6C2-3	22.0781	21.0927	21.7791	26.6017	26.4307	21.8453	28.8063	28.6123	28.9054	21.5716	21.7493	23.1875	26.9549	26.76
sp|O60437|PEPL_HUMAN Periplakin OS=Homo sapiens OX=9606 GN=PPL PE=1 SV=4;tr|K7EKI8|K7EKI8_HUMAN Periplakin OS=Homo sapiens OX=9606 GN=PPL PE=1 SV=1;tr|K7EQ71|K7EQ71_HUMAN Periplakin (Fragment) OS=Homo sapiens OX=9606 GN=PPL PE=1 SV=1	Periplakin	PPL		0.200452	0.760101	0.463566			0.0487951	0.940712	0.122627			0.751289	0.212258	2.3718		+	1.14374	0.00990187	-1.5643		28	28	28	22.3	22.3	22.3	204.74	0	117.25	582270000	49	O60437;K7EKI8;K7EQ71	O60437;K7EKI8;K7EQ71	22.5774	20.3428	22.9018	22.4135	23.0628	21.7363	21.4499	22.4383	22.3017	23.2059	24.4229	22.6138	24.4273	24.4469
sp|P50895|BCAM_HUMAN Basal cell adhesion molecule OS=Homo sapiens OX=9606 GN=BCAM PE=1 SV=2;tr|A0A087WXM8|A0A087WXM8_HUMAN Basal cell adhesion molecule OS=Homo sapiens OX=9606 GN=BCAM PE=1 SV=1;tr|K7ENU8|K7ENU8_HUMAN Basal cell adhesion molecule (Fragment)	Basal cell adhesion molecule	BCAM		1.0293	0.0778163	1.72153		+	2.43365	0.00146825	4.73634	+		0.702868	0.248172	-1.51139		+	1.74986	0.00240685	-1.39683		20	20	20	50.2	50.2	50.2	67.404	0	197.69	2189800000	82	P50895;A0A087WXM8;K7ENU8;K7ERB7	P50895;A0A087WXM8;K7ENU8	22.776	22.3387	24.8609	24.9149	25.2564	24.9689	28.0665	28.0715	28.0467	25.8085	25.9207	25.9663	25.1457	25.5726
sp|Q9Y4W2-2|LAS1L_HUMAN Isoform 2 of Ribosomal biogenesis protein LAS1L OS=Homo sapiens OX=9606 GN=LAS1L;sp|Q9Y4W2|LAS1L_HUMAN Ribosomal biogenesis protein LAS1L OS=Homo sapiens OX=9606 GN=LAS1L PE=1 SV=2;sp|Q9Y4W2-3|LAS1L_HUMAN Isoform 3 of Ribosomal biog	Ribosomal biogenesis protein LAS1L	LAS1L		0.627185	0.195589	3.17878		+	4.13143	0	7.0375	+		0.973544	0.119247	2.25427		+	1.99713	0.000566403	4.75094	+	26	26	26	42.5	42.5	42.5	81.242	0	278.33	7287800000	98	Q9Y4W2-2;Q9Y4W2;Q9Y4W2-3;Q9Y4W2-4	Q9Y4W2-2;Q9Y4W2;Q9Y4W2-3;Q9Y4W2-4	21.9671	20.9667	21.2215	29.0404	21.7651	22.8861	28.9797	28.3003	27.9877	25.3178	22.5328	25.8688	26.8188	27.4086
sp|Q92766|RREB1_HUMAN Ras-responsive element-binding protein 1 OS=Homo sapiens OX=9606 GN=RREB1 PE=1 SV=3;sp|Q92766-2|RREB1_HUMAN Isoform 2 of Ras-responsive element-binding protein 1 OS=Homo sapiens OX=9606 GN=RREB1;sp|Q92766-5|RREB1_HUMAN Isoform 5 of Ra	Ras-responsive element-binding protein 1	RREB1		0.859636	0.110019	3.11587		+	1.10044	0.0129775	3.8979	+	+	2.95132	0.0151111	5.26519	+	+	4.44651	0	4.68729	+	31	31	31	25.5	25.5	25.5	181.42	0	323.31	4368300000	125	Q92766;Q92766-2;Q92766-5;Q92766-3;C9JU34;Q92766-6;C9JPJ6;A0A087X055;C9JE09;Q92766-4	Q92766;Q92766-2;Q92766-5;Q92766-3;C9JU34	27.0089	22.032	21.9934	27.3001	26.4617	26.62	27.5413	27.6052	27.5814	23.1175	22.4047	22.5418	28.8755	28.131
tr|B9EGE7|B9EGE7_HUMAN ZNF507 protein OS=Homo sapiens OX=9606 GN=ZNF507 PE=1 SV=1;sp|Q8TCN5|ZN507_HUMAN Zinc finger protein 507 OS=Homo sapiens OX=9606 GN=ZNF507 PE=1 SV=2;sp|Q8TCN5-2|ZN507_HUMAN Isoform 2 of Zinc finger protein 507 OS=Homo sapiens OX=9606	Zinc finger protein 507	ZNF507		0.439124	0.334932	3.05043		+	4.13955	0	8.33114	+		NaN	1	0		+	5.09619	0	10.1999	+	12	12	12	20.1	20.1	20.1	106.33	0	51.864	18326000000	28	B9EGE7;Q8TCN5;Q8TCN5-2	B9EGE7;Q8TCN5;Q8TCN5-2	21.1325	22.2195	22.5879	22.4388	21.7411	30.9114	29.9712	30.7514	30.2107	20.9208	20.8413	21.8471	20.8627	20.8353
tr|K7ERF1|K7ERF1_HUMAN Eukaryotic translation initiation factor 3 subunit K OS=Homo sapiens OX=9606 GN=EIF3K PE=1 SV=1;sp|Q9UBQ5-2|EIF3K_HUMAN Isoform 2 of Eukaryotic translation initiation factor 3 subunit K OS=Homo sapiens OX=9606 GN=EIF3K;sp|Q9UBQ5|EIF3	Eukaryotic translation initiation factor 3 subunit K	EIF3K		0.100302	0.884162	-0.550919			0.0209817	0.970849	-0.0846386			0.45573	0.556274	-0.316894		+	3.79663	0	5.30619	+	7	7	7	45.3	45.3	45.3	22.095	0	69.05	4770100000	34	K7ERF1;Q9UBQ5-2;Q9UBQ5;K7ES31;K7EQM4;A0A087WVB9;B4DQ48;K7EK53	K7ERF1;Q9UBQ5-2;Q9UBQ5;K7ES31;K7EQM4;A0A087WVB9	26.0469	23.0329	21.498	25.7659	22.2614	20.8976	23.6428	23.1412	23.5398	23.0383	23.1418	23.0383	22.9603	22.1692
tr|K7ES02|K7ES02_HUMAN Bleomycin hydrolase (Fragment) OS=Homo sapiens OX=9606 GN=BLMH PE=1 SV=1;sp|Q13867|BLMH_HUMAN Bleomycin hydrolase OS=Homo sapiens OX=9606 GN=BLMH PE=1 SV=1;tr|K7ESE8|K7ESE8_HUMAN Bleomycin hydrolase (Fragment) OS=Homo sapiens OX=9606	Bleomycin hydrolase	BLMH	+	4.30376	0	-4.05114		+	2.51349	0.00150511	-2.53759			0.169849	0.786427	0.559678		+	1.13127	0.00993593	-1.66357		4	4	4	13.8	13.8	13.8	37.198	0	7.324	89157000	9	K7ES02;Q13867;K7ESE8;J3KSD8;J3KS79;K7ENH5	K7ES02;Q13867;K7ESE8;J3KSD8	25.2848	25.4296	24.9465	21.4522	21.1744	20.8809	22.4079	23.415	22.2252	22.3231	22.9205	24.3258	25.5328	23.9568
tr|E9PFE2|E9PFE2_HUMAN General transcription factor II-I repeat domain-containing protein 1 OS=Homo sapiens OX=9606 GN=GTF2IRD1 PE=1 SV=1;sp|Q9UHL9-2|GT2D1_HUMAN Isoform 2 of General transcription factor II-I repeat domain-containing protein 1 OS=Homo sapi	General transcription factor II-I repeat domain-containing protein 1	GTF2IRD1		0.836418	0.117028	2.83039		+	1.78155	0.00303145	6.1843	+	+	1.78594	0.0209913	5.59038	+	+	3.56618	0	7.72725	+	44	44	44	57	57	57	106.05	0	323.31	22835000000	397	E9PFE2;Q9UHL9-2;Q9UHL9;Q9UHL9-3;H7C4Q8	E9PFE2;Q9UHL9-2;Q9UHL9;Q9UHL9-3	26.0138	21.1997	25.7162	27.5345	26.9436	26.9428	30.5044	30.4422	30.536	22.124	23.4206	21.2243	29.6229	28.4841
tr|K7ESN3|K7ESN3_HUMAN GH3 domain-containing protein OS=Homo sapiens OX=9606 GN=GHDC PE=1 SV=1;sp|Q8N2G8-3|GHDC_HUMAN Isoform 3 of GH3 domain-containing protein OS=Homo sapiens OX=9606 GN=GHDC;sp|Q8N2G8|GHDC_HUMAN GH3 domain-containing protein OS=Homo sapi	GH3 domain-containing protein	GHDC		NaN	1	0			0.363724	0.339027	1.08027			0.105563	0.886405	-0.159414		+	2.60954	0.000591912	-1.27731		11	11	11	31.5	31.5	31.5	51.814	0	33.621	916150000	51	K7ESN3;Q8N2G8-3;Q8N2G8;Q8N2G8-2	K7ESN3;Q8N2G8-3;Q8N2G8;Q8N2G8-2	21.5715	22.632	22.3197	21.9983	23.8093	20.9104	24.5875	20.8612	24.3153	26.2511	25.9857	25.9056	25.0293	25.7666
tr|C9JEJ2|C9JEJ2_HUMAN Choline-phosphate cytidylyltransferase A OS=Homo sapiens OX=9606 GN=PCYT1A PE=1 SV=1;sp|P49585|PCY1A_HUMAN Choline-phosphate cytidylyltransferase A OS=Homo sapiens OX=9606 GN=PCYT1A PE=1 SV=2;tr|C9J050|C9J050_HUMAN Choline-phosphate	Choline-phosphate cytidylyltransferase A	PCYT1A		1.03112	0.0684604	2.78502		+	2.15641	0.00150424	6.25857	+		0.272811	0.665068	0.689757		+	3.46209	0	6.05585	+	20	20	10	59.5	59.5	37.1	43.263	0	317.04	15199000000	207	C9JEJ2;P49585;C9J050;H7C1T3;C9J2E1;C9JPY0;C9JVS0;F8WAZ5;F8WBU2;F2Z2B1	C9JEJ2;P49585;C9J050;H7C1T3;C9J2E1	20.529	24.1581	24.2543	26.3912	25.603	25.3022	29.314	29.24	29.163	23.1601	23.4288	24.6799	25.7564	24.8571
tr|M0QX90|M0QX90_HUMAN Zinc finger protein 649 OS=Homo sapiens OX=9606 GN=ZNF649 PE=1 SV=1;sp|Q9BS31|ZN649_HUMAN Zinc finger protein 649 OS=Homo sapiens OX=9606 GN=ZNF649 PE=1 SV=1	Zinc finger protein 649	ZNF649		0.282955	0.723905	-0.193248			0.469028	0.49813	-0.172132			0.625579	0.297687	1.14055			NaN	1	0		9	9	9	32.1	32.1	32.1	54.37	0	53.05	396060000	33	M0QX90;Q9BS31	M0QX90;Q9BS31	26.1725	25.9415	25.9391	26.1148	26.0614	25.2972	25.5928	26.0713	25.8726	22.051	21.9519	21.842	22.0984	22.456
tr|J3KTA4|J3KTA4_HUMAN DEAD box protein 5 OS=Homo sapiens OX=9606 GN=DDX5 PE=1 SV=1;sp|P17844|DDX5_HUMAN Probable ATP-dependent RNA helicase DDX5 OS=Homo sapiens OX=9606 GN=DDX5 PE=1 SV=1;sp|P17844-2|DDX5_HUMAN Isoform 2 of Probable ATP-dependent RNA helic	Probable ATP-dependent RNA helicase DDX5	DDX5		1.14339	0.0526807	2.53369		+	2.34553	0.00153493	5.91812	+		0.361394	0.544547	1.2082		+	1.21239	0.00616337	3.39351	+	30	30	24	57.2	57.2	48.7	69.086	0	323.31	7434600000	176	J3KTA4;P17844;P17844-2;J3KRZ1;J3QRQ7;J3QSF1;J3KRX8;J3KTQ4;J3QR02;J3QRN5;X6RLV5;J3QLG9;J3QR62	J3KTA4;P17844;P17844-2	24.1568	24.4846	21.2715	26.2229	25.7902	25.5009	29.1917	29.0312	29.4443	22.0954	26.1639	25.9024	26.8461	25.5976
tr|A0A0C4DFL7|A0A0C4DFL7_HUMAN Lanosterol 14-alpha demethylase OS=Homo sapiens OX=9606 GN=CYP51A1 PE=1 SV=1;sp|Q16850|CP51A_HUMAN Lanosterol 14-alpha demethylase OS=Homo sapiens OX=9606 GN=CYP51A1 PE=1 SV=3;sp|Q16850-2|CP51A_HUMAN Isoform 2 of Lanosterol 1	Lanosterol 14-alpha demethylase	CYP51A1		NaN	1	0		+	3.72648	0.000971751	4.70009	+		0.0144089	0.987234	0.012689			1.25663	0.0569182	-0.282157		19	19	19	51.5	51.5	51.5	57.278	0	323.31	5683600000	158	A0A0C4DFL7;Q16850;Q16850-2;H7C0D0;A0A3B3ITR4;C9IYR8	A0A0C4DFL7;Q16850;Q16850-2	22.5712	21.5158	21.5448	21.4659	22.9493	22.4251	26.5435	26.7188	26.4698	28.4247	28.1135	28.2197	27.8715	28.1251
sp|Q8N8R7|AL14E_HUMAN ARL14 effector protein OS=Homo sapiens OX=9606 GN=ARL14EP PE=1 SV=1;tr|E9PRK7|E9PRK7_HUMAN ARL14 effector protein (Fragment) OS=Homo sapiens OX=9606 GN=ARL14EP PE=1 SV=1	ARL14 effector protein	ARL14EP		0.773004	0.134269	2.51681		+	3.58665	0.00092973	5.93619	+		0.364346	0.54047	1.27422		+	3.6413	0	5.36287	+	13	13	13	61.2	61.2	61.2	29.337	0	54.375	4443400000	65	Q8N8R7;E9PRK7	Q8N8R7;E9PRK7	21.5667	21.584	22.9481	22.1456	24.4154	27.0882	28.2992	27.7895	27.8185	22.6039	21.9772	22.584	24.8189	25.3797
sp|O15525|MAFG_HUMAN Transcription factor MafG OS=Homo sapiens OX=9606 GN=MAFG PE=1 SV=1	Transcription factor MafG	MAFG		0.692249	0.167856	2.37157		+	2.02378	0.00204277	4.62459	+	+	1.63098	0.0367421	2.61632	+	+	4.39586	0	5.34511	+	8	4	4	40.7	25.3	25.3	17.849	0	22.519	2624700000	25	O15525;I3L2F8	O15525	22.5043	22.3776	19.5004	25.3649	24.6953	21.4369	25.9412	25.9816	26.3333	21.3885	21.8594	22.1084	25.4663	24.6621
sp|P00533|EGFR_HUMAN Epidermal growth factor receptor OS=Homo sapiens OX=9606 GN=EGFR PE=1 SV=2;tr|E9PFD7|E9PFD7_HUMAN Receptor protein-tyrosine kinase OS=Homo sapiens OX=9606 GN=EGFR PE=1 SV=3;tr|Q504U8|Q504U8_HUMAN Receptor protein-tyrosine kinase OS=Hom	Epidermal growth factor receptor;Receptor protein-tyrosine kinase	EGFR		NaN	1	0		+	2.90137	0.0011223	4.68091	+		0.22299	0.816789	-0.105866			1.12373	0.410127	-0.103104		33	33	32	37.4	37.4	36.4	134.28	0	323.31	7848200000	282	P00533;E9PFD7;Q504U8;P00533-4;P00533-3;P00533-2;A0A1W2PRR9;C9JYS6;H3BLT0;P04626-6	P00533;E9PFD7;Q504U8;P00533-4;P00533-3	21.534	23.2814	21.6411	21.9558	22.6633	21.4249	26.6514	26.803	27.0448	28.6443	28.6088	28.5709	28.3424	28.2947
sp|Q9Y5J1|UTP18_HUMAN U3 small nucleolar RNA-associated protein 18 homolog OS=Homo sapiens OX=9606 GN=UTP18 PE=1 SV=3	U3 small nucleolar RNA-associated protein 18 homolog	UTP18		0.8478	0.116489	2.27786		+	3.29829	0.000995745	5.89825	+		0.917773	0.13405	2.42364		+	4.23779	0	6.31166	+	16	16	16	46.2	46.2	46.2	62.003	0	248.64	4500900000	92	Q9Y5J1;J3KSR7;J3QLD6;J3QRG0;J3QR85;F6VJE8	Q9Y5J1	20.5492	22.5092	21.7044	25.4736	21.7344	24.3884	27.5629	27.3438	27.5508	21.9908	21.0517	21.8635	25.3093	25.2034
tr|M0R1C8|M0R1C8_HUMAN Zinc finger protein 324A (Fragment) OS=Homo sapiens OX=9606 GN=ZNF324 PE=1 SV=1;sp|O75467|Z324A_HUMAN Zinc finger protein 324A OS=Homo sapiens OX=9606 GN=ZNF324 PE=2 SV=1;sp|Q6AW86-2|Z324B_HUMAN Isoform 2 of Zinc finger protein 324B	Zinc finger protein 324A;Zinc finger protein 324B	ZNF324;ZNF324B		0.0866663	0.909765	0.205702			0.227818	0.677441	0.430251			0.0457089	0.947989	-0.137363			0.339575	0.392891	-0.677631		5	5	5	18.9	18.9	18.9	45.279	0	38.196	269960000	16	M0R1C8;O75467;Q6AW86-2;Q6AW86;Q96I98	M0R1C8;O75467;Q6AW86-2;Q6AW86	22.1608	23.8976	24.488	24.2533	24.1282	22.7821	23.8853	24.3925	23.5594	24.1572	22.0065	23.0798	22.2821	21.9777
sp|Q9ULD5|ZN777_HUMAN Zinc finger protein 777 OS=Homo sapiens OX=9606 GN=ZNF777 PE=1 SV=3	Zinc finger protein 777	ZNF777		0.867914	0.114517	2.20808		+	1.64704	0.004	4.24553	+	+	2.96123	0.0127333	2.58901	+	+	3.50856	0	1.40388	+	23	23	22	31.9	31.9	31	93.761	0	97.117	4598400000	99	Q9ULD5	Q9ULD5	24.6263	21.5063	25.1882	26.5777	25.6351	25.7322	27.4878	28.319	28.2505	25.0421	25.3993	25.2772	28.3394	27.8087
tr|M0R230|M0R230_HUMAN Zinc finger protein 417 OS=Homo sapiens OX=9606 GN=ZNF417 PE=1 SV=1;sp|Q8TAU3|ZN417_HUMAN Zinc finger protein 417 OS=Homo sapiens OX=9606 GN=ZNF417 PE=1 SV=2;sp|Q8TAU3-2|ZN417_HUMAN Isoform 2 of Zinc finger protein 417 OS=Homo sapien	Zinc finger protein 417	ZNF417		0.215548	0.791373	0.169949			0.63614	0.143974	-0.490741			1.46594	0.13717	0.420133			0.701568	0.34998	0.153955		20	17	2	38	33.4	3.5	65.604	0	52.444	2789400000	120	M0R230;Q8TAU3;Q8TAU3-2;M0R2A6;M0R082;S4R2X8	M0R230;Q8TAU3;Q8TAU3-2	26.8083	26.4047	27.4158	26.98	27.2189	26.9398	26.0146	26.5985	26.5436	25.8218	25.9159	26.0584	26.2167	26.2614
tr|E9PG71|E9PG71_HUMAN Receptor protein-tyrosine kinase OS=Homo sapiens OX=9606 GN=EPHA4 PE=1 SV=1;sp|P54764-2|EPHA4_HUMAN Isoform 2 of Ephrin type-A receptor 4 OS=Homo sapiens OX=9606 GN=EPHA4;sp|P54764|EPHA4_HUMAN Ephrin type-A receptor 4 OS=Homo sapiens	Receptor protein-tyrosine kinase;Ephrin type-A receptor 4	EPHA4		NaN	1	0		+	3.24428	0.00111197	4.67242	+		NaN	1	0			NaN	1	0		9	8	7	12.9	11.7	10.3	105.71	0	69.721	507080000	25	E9PG71;P54764-2;P54764	E9PG71;P54764-2;P54764	21.3383	22.7747	21.4397	22.522	21.2723	22.565	26.577	26.3746	26.6183	23.0034	22.0399	21.9558	23.0866	21.1894
sp|Q92585|MAML1_HUMAN Mastermind-like protein 1 OS=Homo sapiens OX=9606 GN=MAML1 PE=1 SV=3	Mastermind-like protein 1	MAML1		0.791458	0.13101	2.20453		+	3.99404	0.00104559	3.60121	+		NaN	1	0		+	3.32689	0	3.1855	+	7	7	7	15.2	15.2	15.2	108.05	0	43.662	917340000	28	Q92585	Q92585	22.6437	21.8721	22.2558	25.806	25.6489	21.9302	25.9911	25.7832	25.8008	22.2012	21.472	22.2416	22.064	20.1789
sp|Q8NCY6|MSD4_HUMAN Myb/SANT-like DNA-binding domain-containing protein 4 OS=Homo sapiens OX=9606 GN=MSANTD4 PE=1 SV=1	Myb/SANT-like DNA-binding domain-containing protein 4	MSANTD4		0.861371	0.114613	2.20349		+	5.95285	0	5.76509	+		0.678891	0.24117	3.04572		+	6.05541	0	6.31762	+	11	11	11	43.5	43.5	43.5	41.149	0	275.87	7164900000	97	Q8NCY6;E9PLV2;A0A087WZP0;E9PKC8;E9PRK0	Q8NCY6	21.884	22.0468	21.8335	25.3762	25.248	21.7505	27.6943	27.5078	27.8574	22.3269	22.4356	22.1784	27.8986	26.8491
sp|O00161|SNP23_HUMAN Synaptosomal-associated protein 23 OS=Homo sapiens OX=9606 GN=SNAP23 PE=1 SV=1;sp|O00161-2|SNP23_HUMAN Isoform SNAP-23b of Synaptosomal-associated protein 23 OS=Homo sapiens OX=9606 GN=SNAP23;tr|H3BNE1|H3BNE1_HUMAN Synaptosomal-associ	Synaptosomal-associated protein 23;Synaptosomal-associated protein	SNAP23		0.394448	0.449379	-0.676103			0.245567	0.630164	0.54833			0.453434	0.455944	-0.94791			0.698337	0.0772807	-0.707798		5	5	5	41.2	41.2	41.2	23.354	0	13.484	277600000	19	O00161;O00161-2;H3BNE1;H3BR18;H3BM38;H3BPJ0;H3BV99;H3BP15;H3BQY9;H3BNG6;H3BU94;H3BR99	O00161;O00161-2;H3BNE1;H3BR18;H3BM38;H3BPJ0;H3BV99	23.6726	21.5789	23.6248	22.6747	21.9179	22.2554	24.3641	23.6769	22.4803	23.7995	24.2269	23.6729	23.1512	21.329
sp|Q9H845|ACAD9_HUMAN Complex I assembly factor ACAD9, mitochondrial OS=Homo sapiens OX=9606 GN=ACAD9 PE=1 SV=1;tr|H0Y8Z9|H0Y8Z9_HUMAN Complex I assembly factor ACAD9, mitochondrial (Fragment) OS=Homo sapiens OX=9606 GN=ACAD9 PE=1 SV=1	Acyl-CoA dehydrogenase family member 9, mitochondrial	ACAD9		0.489284	0.325712	-0.960726		+	2.3759	0.00152697	4.64858	+	+	2.49046	0.0240162	-0.830549		+	3.95115	0	-1.28667		23	23	23	43.8	43.8	43.8	68.76	0	109.69	3611600000	143	Q9H845;H0Y8Z9;D6RCD8	Q9H845;H0Y8Z9	22.5013	21.6735	24.322	22.1705	21.1824	22.2617	27.3897	27.7261	27.3267	27.8838	27.8827	27.9573	27.1712	27.2393
sp|Q9ULJ6|ZMIZ1_HUMAN Zinc finger MIZ domain-containing protein 1 OS=Homo sapiens OX=9606 GN=ZMIZ1 PE=1 SV=3;tr|A0A087WYE6|A0A087WYE6_HUMAN Zinc finger MIZ domain-containing protein 1 OS=Homo sapiens OX=9606 GN=ZMIZ1 PE=1 SV=1	Zinc finger MIZ domain-containing protein 1	ZMIZ1		0.898555	0.106476	2.1806		+	1.52081	0.00485106	3.69394	+		1.04414	0.0999678	2.39004		+	4.95978	0	6.05311	+	14	14	10	18.5	18.5	12.7	115.48	0	209.84	6109900000	64	Q9ULJ6;A0A087WYE6;Q9ULJ6-2;F6WR09	Q9ULJ6;A0A087WYE6	21.9083	22.2325	25.4107	25.7206	25.1341	25.2386	26.6828	26.9291	27.0214	22.6622	22.4488	22.4355	26.0191	25.9369
sp|Q9UJV9|DDX41_HUMAN Probable ATP-dependent RNA helicase DDX41 OS=Homo sapiens OX=9606 GN=DDX41 PE=1 SV=2	Probable ATP-dependent RNA helicase DDX41	DDX41		0.684222	0.17342	2.16256		+	1.18793	0.0107397	3.47485	+		1.07764	0.0918414	2.6992		+	1.84657	0.00133011	3.54498	+	21	21	21	41	41	41	69.837	0	99.024	3936800000	89	Q9UJV9;A0A499FJW5;H0Y8L8;D6RGI7;D6RD33;H0YA06	Q9UJV9	25.4944	22.0722	20.9164	25.6795	24.2275	25.0637	26.3417	26.2196	26.3462	24.6377	24.9691	22.3925	27.6372	27.4683
sp|O00257|CBX4_HUMAN E3 SUMO-protein ligase CBX4 OS=Homo sapiens OX=9606 GN=CBX4 PE=1 SV=3	E3 SUMO-protein ligase CBX4	CBX4	+	2.2689	0.022816	-0.783671		+	3.06198	0.00148537	-1.1732		+	1.8567	0.036627	-1.25289		+	3.71281	0	-1.33543		59	59	59	61.8	61.8	61.8	61.367	0	323.31	1418900000000	3110	O00257;O00257-3;I3L4F1;F8WCW6	O00257	36.9265	36.9653	36.7986	36.3725	35.9268	36.04	35.547	35.9558	35.668	36.5477	36.4315	36.4804	35.5303	35.5325
sp|O00264|PGRC1_HUMAN Membrane-associated progesterone receptor component 1 OS=Homo sapiens OX=9606 GN=PGRMC1 PE=1 SV=3;sp|O00264-2|PGRC1_HUMAN Isoform 2 of Membrane-associated progesterone receptor component 1 OS=Homo sapiens OX=9606 GN=PGRMC1	Membrane-associated progesterone receptor component 1	PGRMC1	+	1.18016	0.0464317	-3.06078		+	1.49413	0.0106487	0.893983	+		0.0436193	0.949088	0.108591		+	1.36803	0.021469	-0.447077		10	10	9	64.1	64.1	59.5	21.671	0	298.92	6630800000	73	O00264;O00264-2	O00264;O00264-2	26.2404	26.6954	25.8341	24.9697	20.9252	23.6927	26.9848	27.3882	27.0789	28.3428	28.2071	28.5105	27.8993	27.3637
tr|A0A669KBL1|A0A669KBL1_HUMAN Ubiquitin carboxyl-terminal hydrolase 7 OS=Homo sapiens OX=9606 GN=USP7 PE=1 SV=1;sp|Q93009-3|UBP7_HUMAN Isoform 3 of Ubiquitin carboxyl-terminal hydrolase 7 OS=Homo sapiens OX=9606 GN=USP7;sp|Q93009|UBP7_HUMAN Ubiquitin carb	Ubiquitin carboxyl-terminal hydrolase 7;Ubiquitin carboxyl-terminal hydrolase	USP7		1.06177	0.0672188	2.15752		+	1.84457	0.00330023	2.73176	+	+	1.98585	0.0178824	5.84722	+	+	2.38872	0.000341667	3.43382	+	31	31	31	43.6	43.6	43.6	132.33	0	233.12	2528800000	104	A0A669KBL1;Q93009-3;Q93009;H3BND8;F5H2X1;I3L2D8;H3BUV0;H3BTM1;H3BRA2;H3BQD1	A0A669KBL1;Q93009-3;Q93009;H3BND8	21.7845	22.9294	22.3374	26.0354	24.5554	22.9331	24.3411	24.7028	26.2027	22.193	21.8428	21.2359	29.2519	28.4119
sp|Q13426|XRCC4_HUMAN DNA repair protein XRCC4 OS=Homo sapiens OX=9606 GN=XRCC4 PE=1 SV=2;sp|Q13426-3|XRCC4_HUMAN Isoform 3 of DNA repair protein XRCC4 OS=Homo sapiens OX=9606 GN=XRCC4;sp|Q13426-2|XRCC4_HUMAN Isoform 2 of DNA repair protein XRCC4 OS=Homo s	DNA repair protein XRCC4	XRCC4		0.859588	0.116179	2.14172		+	3.65197	0.000866499	4.41742	+		0.904013	0.144246	2.14602		+	1.45268	0.00329396	2.91796	+	8	8	8	28.9	28.9	28.9	38.286	0	27.906	918800000	25	Q13426;Q13426-3;Q13426-2	Q13426;Q13426-3;Q13426-2	21.773	22.1636	21.0197	24.9374	24.8672	21.5768	25.8966	26.2166	26.0953	20.1226	23.0643	22.5509	24.2732	25.0362
sp|O00391|QSOX1_HUMAN Sulfhydryl oxidase 1 OS=Homo sapiens OX=9606 GN=QSOX1 PE=1 SV=3;sp|O00391-2|QSOX1_HUMAN Isoform 2 of Sulfhydryl oxidase 1 OS=Homo sapiens OX=9606 GN=QSOX1	Sulfhydryl oxidase 1	QSOX1		NaN	1	0			NaN	1	0			0.703447	0.240848	-1.93644		+	1.6552	0.00178206	-3.2825		10	10	10	19.4	19.4	19.4	82.577	0	36.986	445570000	26	O00391;O00391-2;A8MXT8;H0Y5Z8	O00391;O00391-2	21.9337	21.6824	20.9453	22.2997	21.4909	21.5724	21.9391	21.8442	22.0479	25.9354	26.3706	25.6315	25.5524	24.9862
sp|Q08050|FOXM1_HUMAN Forkhead box protein M1 OS=Homo sapiens OX=9606 GN=FOXM1 PE=1 SV=3;tr|A0A0D9SFF0|A0A0D9SFF0_HUMAN Forkhead box protein M1 OS=Homo sapiens OX=9606 GN=FOXM1 PE=1 SV=1;sp|Q08050-2|FOXM1_HUMAN Isoform 2 of Forkhead box protein M1 OS=Homo	Forkhead box protein M1	FOXM1		0.294902	0.557316	2.13586		+	4.07869	0.00061244	6.1842	+		1.05712	0.0907324	4.14247		+	4.35788	0	7.01558	+	16	16	16	38.3	38.3	38.3	84.282	0	178.89	8842000000	106	Q08050;A0A0D9SFF0;Q08050-2;Q08050-3;H0YG99;H0YGS4	Q08050;A0A0D9SFF0;Q08050-2;Q08050-3	22.736	23.2788	22.2273	22.3745	21.5717	30.7035	28.7309	29.3876	28.6762	21.7739	21.6128	21.8563	22.4311	26.5323
sp|Q15366-2|PCBP2_HUMAN Isoform 2 of Poly(rC)-binding protein 2 OS=Homo sapiens OX=9606 GN=PCBP2;sp|Q15366-7|PCBP2_HUMAN Isoform 7 of Poly(rC)-binding protein 2 OS=Homo sapiens OX=9606 GN=PCBP2;sp|Q15366-8|PCBP2_HUMAN Isoform 8 of Poly(rC)-binding protein	Poly(rC)-binding protein 2	PCBP2		0.835864	0.12059	2.12696		+	3.15155	0.00131757	4.03655	+		0.236977	0.745872	-0.247337		+	2.12288	0.00101746	1.76516	+	7	7	5	23.2	23.2	20.2	38.651	0	47.855	1497200000	25	Q15366-2;Q15366-7;Q15366-8;Q15366-5;F8VXH9;Q15366-4;Q15366-6;Q15366-3;Q15366;H3BRU6;F8VZX2;F8W0G4;F8W1G6;H3BND9;J3QT27;P57721;P57721-4;E9PFP8;P57721-5;P57721-3;P57721-2;F8VRH0;F8VTZ0	Q15366-2;Q15366-7;Q15366-8;Q15366-5;F8VXH9;Q15366-4;Q15366-6;Q15366-3;Q15366;H3BRU6;F8VZX2;F8W0G4;F8W1G6;H3BND9	20.8016	21.8531	21.8095	24.6957	21.357	24.7923	25.3851	26.0202	25.1686	24.1063	25.1483	24.1706	24.5558	23.7734
sp|Q5T3J3|LRIF1_HUMAN Ligand-dependent nuclear receptor-interacting factor 1 OS=Homo sapiens OX=9606 GN=LRIF1 PE=1 SV=1	Ligand-dependent nuclear receptor-interacting factor 1	LRIF1		0.778847	0.135573	2.12229		+	3.07475	0.00127514	8.44335	+		0.222371	0.730787	0.467048		+	3.33238	0	7.15837	+	42	42	42	67.4	67.4	67.4	84.567	0	323.31	19665000000	315	Q5T3J3;Q5T3J3-2	Q5T3J3	21.9828	21.3709	24.3938	25.8641	25.2078	23.0426	31.26	30.7041	31.1135	23.2645	21.0396	22.2816	22.5478	21.8464
sp|Q96SE7|ZN347_HUMAN Zinc finger protein 347 OS=Homo sapiens OX=9606 GN=ZNF347 PE=1 SV=2;sp|Q96SE7-2|ZN347_HUMAN Isoform 2 of Zinc finger protein 347 OS=Homo sapiens OX=9606 GN=ZNF347	Zinc finger protein 347	ZNF347		0.896096	0.108281	2.08116		+	1.81484	0.00308243	3.89283	+		0.276005	0.647391	0.930195		+	2.39577	0.00033232	2.93014	+	17	12	12	28.2	22.6	22.6	95.769	0	148.3	914630000	37	Q96SE7;Q96SE7-2;M0QZE2;M0QXR8	Q96SE7;Q96SE7-2	21.1783	19.7642	23.0167	24.0668	23.7935	22.3425	24.9655	25.1147	25.5575	21.8129	22.24	23.353	24.7858	24.5546
sp|Q63HK3|ZKSC2_HUMAN Zinc finger protein with KRAB and SCAN domains 2 OS=Homo sapiens OX=9606 GN=ZKSCAN2 PE=1 SV=2;sp|Q63HK3-2|ZKSC2_HUMAN Isoform 2 of Zinc finger protein with KRAB and SCAN domains 2 OS=Homo sapiens OX=9606 GN=ZKSCAN2	Zinc finger protein with KRAB and SCAN domains 2	ZKSCAN2		0.96988	0.0885513	2.04763		+	2.09322	0.00205155	3.35434	+		0.669558	0.242082	3.70446		+	3.78344	0	5.44069	+	27	27	26	36.3	36.3	35.6	110.94	0	323.31	4421300000	122	Q63HK3;Q63HK3-2;H3BQ35;K7EPZ1;K7EM64	Q63HK3;Q63HK3-2	21.1032	22.6562	23.3345	25.7019	23.1521	24.3828	25.9383	25.3566	25.8619	22.3643	21.6648	23.0004	28.7406	28.3087
sp|O00472|ELL2_HUMAN RNA polymerase II elongation factor ELL2 OS=Homo sapiens OX=9606 GN=ELL2 PE=1 SV=2;sp|O00472-2|ELL2_HUMAN Isoform 2 of RNA polymerase II elongation factor ELL2 OS=Homo sapiens OX=9606 GN=ELL2	RNA polymerase II elongation factor ELL2	ELL2		NaN	1	0			NaN	1	0			NaN	1	0		+	3.18191	0	3.07817	+	9	9	9	20.5	20.5	20.5	72.324	0	149.9	779020000	20	O00472;O00472-2;D6RC27;A0A0U1RR08	O00472;O00472-2	21.9326	22.4739	20.9765	22.6864	21.6614	22.6046	22.5292	23.0927	21.527	22.4708	23.5281	22.7234	21.1643	22.7672
sp|O00555-6|CAC1A_HUMAN Isoform 6 of Voltage-dependent P/Q-type calcium channel subunit alpha-1A OS=Homo sapiens OX=9606 GN=CACNA1A;sp|O00555-4|CAC1A_HUMAN Isoform 4 of Voltage-dependent P/Q-type calcium channel subunit alpha-1A OS=Homo sapiens OX=9606 GN=	Voltage-dependent P/Q-type calcium channel subunit alpha-1A	CACNA1A	+	2.28488	0.0153486	-1.14226		+	2.76211	0.00145311	-1.46834			1.15102	0.0840584	-2.04446		+	2.06863	0.000775087	-2.71491		8	8	1	5.8	5.8	1	280.94	0	171.03	2254200000	67	O00555-6;O00555-4	O00555-6;O00555-4	28.7822	28.4969	28.9499	27.8649	27.6193	27.3179	27.095	27.5637	27.1653	24.4116	25.6077	24.4777	21.9218	24.2595
sp|Q9NVV4|PAPD1_HUMAN Poly(A) RNA polymerase, mitochondrial OS=Homo sapiens OX=9606 GN=MTPAP PE=1 SV=1;sp|Q9NVV4-2|PAPD1_HUMAN Isoform 2 of Poly(A) RNA polymerase, mitochondrial OS=Homo sapiens OX=9606 GN=MTPAP	Poly(A) RNA polymerase, mitochondrial	MTPAP		0.226596	0.71279	-0.60672		+	2.4088	0.00154784	4.60634	+		0.951401	0.237036	-0.492041		+	1.75474	0.00506294	-0.699137		17	17	17	44.7	44.7	44.7	66.171	0	249.96	2889800000	138	Q9NVV4;Q9NVV4-2;Q5T852;Q5T851	Q9NVV4;Q9NVV4-2	22.2272	21.1421	23.784	22.4595	20.3509	22.5228	27.0585	27.0348	26.8791	27.5586	27.5771	27.1162	26.5503	27.0654
sp|Q9H972|CN093_HUMAN Uncharacterized protein C14orf93 OS=Homo sapiens OX=9606 GN=C14orf93 PE=1 SV=1;sp|Q9H972-2|CN093_HUMAN Isoform 2 of Uncharacterized protein C14orf93 OS=Homo sapiens OX=9606 GN=C14orf93;tr|A0A0C4DFZ6|A0A0C4DFZ6_HUMAN Uncharacterized pr	Uncharacterized protein C14orf93	C14orf93		0.884773	0.111918	2.03534		+	4.61889	0	4.60024	+	+	1.85208	0.0205415	3.46898	+	+	4.03632	0	3.90502	+	17	17	17	44.2	44.2	44.2	58.696	0	134.44	3274300000	73	Q9H972;Q9H972-2;A0A0C4DFZ6;G5E9D9;G3V2P0;J3KPV9;G3V396;G3V4W6;G3V4L9;G3V2U2;G3V3W0	Q9H972;Q9H972-2;A0A0C4DFZ6	21.8999	22.2679	22.3434	24.8668	25.6251	22.1254	26.8227	26.4807	27.0085	23.4825	23.3844	22.8182	27.8778	27.0584
sp|O00622|CCN1_HUMAN CCN family member 1 OS=Homo sapiens OX=9606 GN=CCN1 PE=1 SV=1	Protein CYR61	CYR61		1.03815	0.0673406	-2.76918			0.300068	0.476878	0.902146			0.446867	0.579709	0.276304		+	5.63529	0	6.66504	+	16	16	16	43	43	43	42.026	0	139.19	6867900000	69	O00622	O00622	26.6141	22.6026	25.7686	21.9567	21.9333	22.7878	25.8333	25.9357	25.9228	22.1127	22.191	22.5801	23.0097	22.2808
sp|O00635|TRI38_HUMAN E3 ubiquitin-protein ligase TRIM38 OS=Homo sapiens OX=9606 GN=TRIM38 PE=1 SV=1	E3 ubiquitin-protein ligase TRIM38	TRIM38		NaN	1	0			0.0408725	0.948355	0.0891787			NaN	1	0		+	1.39254	0.00427066	2.0102	+	3	3	3	6.9	6.9	6.9	53.415	0	6.9097	242440000	6	O00635	O00635	21.6369	22.0067	22.2992	23.1237	20.8504	23.2209	22.8025	22.7721	20.6357	22.7131	21.8194	20.629	21.3989	23.2451
sp|A8MTY0|ZN724_HUMAN Zinc finger protein 724 OS=Homo sapiens OX=9606 GN=ZNF724 PE=2 SV=3;tr|A0A087WUU8|A0A087WUU8_HUMAN Zinc finger protein 724 (Fragment) OS=Homo sapiens OX=9606 GN=ZNF724 PE=1 SV=2	Putative zinc finger protein 724	ZNF724P;ZNF708		1.04475	0.0709771	2.02776		+	3.20995	0.00125843	4.74218	+		0.0430597	0.948556	-0.112654		+	2.39628	0.000335036	3.01099	+	15	15	9	29.1	29.1	19.4	71.172	0	65.047	2119500000	68	A8MTY0;A0A087WUU8;M0R0Z7;M0R3J2;M0QXI2;M0R3D5;M0QZ47;A0A0A0MS76	A8MTY0;A0A087WUU8	23.7267	22.3792	23.8531	26.7165	25.3116	24.0142	28.1736	28.1822	27.8297	21.4123	23.1428	22.1045	23.0569	22.6085
sp|Q9P0W2|HM20B_HUMAN SWI/SNF-related matrix-associated actin-dependent regulator of chromatin subfamily E member 1-related OS=Homo sapiens OX=9606 GN=HMG20B PE=1 SV=1;sp|Q9P0W2-3|HM20B_HUMAN Isoform 3 of SWI/SNF-related matrix-associated actin-dependent r	SWI/SNF-related matrix-associated actin-dependent regulator of chromatin subfamily E member 1-related	HMG20B		0.612449	0.213268	2.02627		+	3.95853	0.000558952	7.49283	+		0.27345	0.663676	-0.699718		+	2.33512	0.000233051	4.92454	+	12	12	12	36	36	36	35.812	0	189.89	6552000000	86	Q9P0W2;Q9P0W2-3;Q9P0W2-2;B5MDG7;K7EJR8;C9J8X5;C9JQA7;C9K049;F8WES5	Q9P0W2;Q9P0W2-3;Q9P0W2-2;B5MDG7;K7EJR8	21.5467	22.202	21.1746	24.5762	25.6054	20.8204	29.4968	29.5544	28.3505	24.1119	22.8514	21.1509	22.2204	22.8548
sp|O43913|ORC5_HUMAN Origin recognition complex subunit 5 OS=Homo sapiens OX=9606 GN=ORC5 PE=1 SV=1;sp|O43913-2|ORC5_HUMAN Isoform 2 of Origin recognition complex subunit 5 OS=Homo sapiens OX=9606 GN=ORC5	Origin recognition complex subunit 5	ORC5		0.467381	0.320507	1.7729		+	2.87082	0.00109551	4.59422	+		1.25463	0.105062	-0.775132		+	1.98944	0.00424393	-0.618577		19	19	19	57.7	57.7	57.7	50.282	0	102.19	2571400000	132	O43913;O43913-2;G3V0H0	O43913;O43913-2	23.058	21.5341	21.2878	20.6458	25.1475	25.4053	26.4467	26.3433	26.8726	26.8579	27.1615	27.3052	26.3141	25.8955
sp|Q14980|NUMA1_HUMAN Nuclear mitotic apparatus protein 1 OS=Homo sapiens OX=9606 GN=NUMA1 PE=1 SV=2;sp|Q14980-2|NUMA1_HUMAN Isoform 2 of Nuclear mitotic apparatus protein 1 OS=Homo sapiens OX=9606 GN=NUMA1;tr|A0A087WY61|A0A087WY61_HUMAN Nuclear mitotic ap	Nuclear mitotic apparatus protein 1	NUMA1		0.630584	0.202554	2.01961		+	3.5663	0.00113317	4.68615	+		1.32429	0.0546301	2.81104		+	1.74891	0.00146718	3.63003	+	28	28	28	21.2	21.2	21.2	238.26	0	222.71	3208200000	85	Q14980;Q14980-2;A0A087WY61;Q14980-4;Q14980-3;H0YFY6;Q14980-5;K4DIE0;F5H4J1;F5H6Y5;F5H2F3;F5H3L6;F5H0Z7;F5H763	Q14980;Q14980-2;A0A087WY61;Q14980-4;Q14980-3;H0YFY6	22.0573	22.9428	21.6509	25.8797	25.3597	21.4703	26.9243	26.7637	27.0214	22.7847	25.3755	22.4853	26.7087	26.772
sp|Q9NY74|ETAA1_HUMAN Ewings tumor-associated antigen 1 OS=Homo sapiens OX=9606 GN=ETAA1 PE=1 SV=2	Ewings tumor-associated antigen 1	ETAA1		0.657294	0.189151	2.0177		+	5.92621	0	4.55466	+		NaN	1	0		+	4.16308	0	6.17731	+	23	23	23	38.2	38.2	38.2	103.44	0	182.51	4650500000	60	Q9NY74;A0A2R8Y7B6;A0A2R8YEV8;A0A2R8Y6Y8	Q9NY74	22.6155	22.5016	22.4684	21.7765	25.7475	26.1146	27.1304	27.2013	26.9179	21.9806	22.6667	21.4865	21.8766	22.4517
tr|J3KPG5|J3KPG5_HUMAN Bromodomain adjacent to zinc finger domain protein 2A OS=Homo sapiens OX=9606 GN=BAZ2A PE=1 SV=1;tr|F8VU39|F8VU39_HUMAN Bromodomain adjacent to zinc finger domain protein 2A OS=Homo sapiens OX=9606 GN=BAZ2A PE=1 SV=1;sp|Q9UIF9-2|BAZ2	Bromodomain adjacent to zinc finger domain protein 2A	BAZ2A		0.875277	0.114339	2.01316		+	4.31396	0.000649746	4.43855	+		0.811991	0.185978	2.06599		+	2.20968	0.000404235	3.75423	+	13	13	13	11.5	11.5	11.5	208.07	0	98.443	1628900000	38	J3KPG5;F8VU39;Q9UIF9-2;Q9UIF9-3;Q9UIF9;A0A0C4DGI9;H0YHL2;H0YII3	J3KPG5;F8VU39;Q9UIF9-2;Q9UIF9-3;Q9UIF9;A0A0C4DGI9	22.0814	21.6335	22.0626	25.4473	24.4768	21.8929	26.4698	26	26.6234	21.0182	22.0565	23.4668	25.117	25.2536
sp|O14646-2|CHD1_HUMAN Isoform 2 of Chromodomain-helicase-DNA-binding protein 1 OS=Homo sapiens OX=9606 GN=CHD1;sp|O14646|CHD1_HUMAN Chromodomain-helicase-DNA-binding protein 1 OS=Homo sapiens OX=9606 GN=CHD1 PE=1 SV=2	Chromodomain-helicase-DNA-binding protein 1	CHD1		0.710141	0.265689	0.421112			0.912186	0.0632847	0.523174		+	1.9987	0.0331622	1.16359	+	+	3.4741	0	1.52038	+	67	66	58	43.2	42.7	38.2	196.59	0	323.31	32856000000	723	O14646-2;O14646;H0Y8V4;A0A087WVF4	O14646-2;O14646	28.9455	29.641	29.7711	29.8358	30.0406	29.7446	30.0854	30.016	29.8258	29.0281	28.911	28.6796	29.6234	30.0628
sp|O14647|CHD2_HUMAN Chromodomain-helicase-DNA-binding protein 2 OS=Homo sapiens OX=9606 GN=CHD2 PE=1 SV=2;sp|O14647-2|CHD2_HUMAN Isoform 2 of Chromodomain-helicase-DNA-binding protein 2 OS=Homo sapiens OX=9606 GN=CHD2;tr|A0A1B0GTU9|A0A1B0GTU9_HUMAN DNA he	Chromodomain-helicase-DNA-binding protein 2	CHD2		0.340067	0.608954	-0.310333			0.124779	0.871122	0.111191			0.83807	0.249159	0.615991		+	2.04267	0.00630513	-0.480787		59	50	50	38	33.3	33.3	211.34	0	323.31	14077000000	442	O14647;O14647-2;A0A1B0GTU9;A0A0D9SEP7;B7Z3I4;O14647-3;A0A0D9SGK0;A0A1B0GU59;A0A0D9SFA3;A0A1B0GTM9;A0A0D9SFI3;A0A0D9SFV8;A0A0D9SF92	O14647;O14647-2;A0A1B0GTU9	28.1233	29.0482	29.117	28.6067	28.6938	28.057	28.9548	28.9123	28.755	29.0746	29.0325	28.9137	29.1155	29.4908
sp|O14672|ADA10_HUMAN Disintegrin and metalloproteinase domain-containing protein 10 OS=Homo sapiens OX=9606 GN=ADAM10 PE=1 SV=1	Disintegrin and metalloproteinase domain-containing protein 10	ADAM10	+	1.39534	0.0331889	-2.70689		+	1.67298	0.0123945	0.578168	+		0.230955	0.775459	-0.165311		+	1.4833	0.00984435	-0.619642		13	13	13	24.1	24.1	24.1	84.141	0	78.263	2154900000	75	O14672;O14672-2;C9J9B4;H3BS53;H0YK87;H0YNC5	O14672	25.9283	25.4973	25.9058	22.3783	24.8434	21.989	26.4976	26.2922	26.2761	26.893	26.5726	26.683	26.1078	26.5222
sp|Q8IU81|I2BP1_HUMAN Interferon regulatory factor 2-binding protein 1 OS=Homo sapiens OX=9606 GN=IRF2BP1 PE=1 SV=1	Interferon regulatory factor 2-binding protein 1	IRF2BP1		0.492317	0.295363	1.95584		+	4.70317	0	4.25762	+		NaN	1	0		+	2.22477	0.000402299	3.4412	+	9	8	8	24.1	22.9	22.9	61.687	0	21.473	811130000	7	Q8IU81	Q8IU81	21.9687	21.7668	22.0464	25.618	25.6078	20.4237	26.017	26.0293	26.5086	20.4438	21.7985	21.5966	22.4866	21.3408
sp|Q99081|HTF4_HUMAN Transcription factor 12 OS=Homo sapiens OX=9606 GN=TCF12 PE=1 SV=1;sp|Q99081-3|HTF4_HUMAN Isoform 3 of Transcription factor 12 OS=Homo sapiens OX=9606 GN=TCF12;tr|B4DGI9|B4DGI9_HUMAN Transcription factor 12 (Fragment) OS=Homo sapiens O	Transcription factor 12	TCF12		0.668054	0.184888	1.94571		+	2.2239	0.00156187	3.36077	+		0.113569	0.866774	0.451836		+	1.6863	0.00161991	3.56792	+	8	8	8	28	28	28	72.964	0	72.834	1064800000	18	Q99081;Q99081-3;B4DGI9;F5GY10;Q99081-4;Q99081-2;H0YNP8;B4DZP2;A0A1B0GVB8;A0A1B0GVR6;H3BTP3;H3BPJ7;P15884-6;H3BNF4;A0A1B0GWD5;A0A0D9SGH7;A0A1B0GW91;H0YNQ5;E9PH57;H3BRK2;P15884-4;P15884;P15884-8;P15884-9;P15884-15;P15884-16;P15884-11;P15884-3;P15884-5;P15884-10;P15884-2;P15884-14;P15884-13;P15884-12;P15884-7	Q99081;Q99081-3;B4DGI9;F5GY10;Q99081-4;Q99081-2;H0YNP8;B4DZP2	20.0481	21.4672	22.1584	25.3507	22.7954	21.3647	24.5109	24.4441	24.801	20.2052	23.0352	22.9393	24.7225	21.451
sp|O14777|NDC80_HUMAN Kinetochore protein NDC80 homolog OS=Homo sapiens OX=9606 GN=NDC80 PE=1 SV=1	Kinetochore protein NDC80 homolog	NDC80		NaN	1	0			0.560162	0.132738	1.01425			NaN	1	0		+	2.30291	0.000585987	1.95291	+	6	6	6	11.4	11.4	11.4	73.912	0	9.0898	336480000	5	O14777;I3L4G3	O14777	22.6444	21.9887	21.5211	22.841	22.5304	22.3541	23.6827	21.6031	23.9112	22.6242	22.0915	21.732	22.4434	21.6177
sp|O14818|PSA7_HUMAN Proteasome subunit alpha type-7 OS=Homo sapiens OX=9606 GN=PSMA7 PE=1 SV=1;sp|O14818-2|PSA7_HUMAN Isoform 2 of Proteasome subunit alpha type-7 OS=Homo sapiens OX=9606 GN=PSMA7;tr|H0Y586|H0Y586_HUMAN Proteasome endopeptidase complex (Fr	Proteasome subunit alpha type-7;Proteasome subunit alpha type-7-like	PSMA7;PSMA8		0.462258	0.336894	-1.25019			0.742406	0.055281	1.72419			NaN	1	0		+	2.78462	0	4.53226	+	8	8	8	35.1	35.1	35.1	27.887	0	104.68	1294000000	23	O14818;O14818-2;H0Y586;Q8TAA3-2;Q8TAA3-5;Q8TAA3;O14818-4;F5GY34;A0A087WYS6	O14818;O14818-2;H0Y586;Q8TAA3-2;Q8TAA3-5;Q8TAA3	25.3322	22.1697	22.1035	22.2358	21.0153	22.6038	24.9449	24.9521	24.881	20.6037	22.0768	22.347	22.801	20.9382
sp|Q01167|FOXK2_HUMAN Forkhead box protein K2 OS=Homo sapiens OX=9606 GN=FOXK2 PE=1 SV=3;sp|Q01167-2|FOXK2_HUMAN Isoform 2 of Forkhead box protein K2 OS=Homo sapiens OX=9606 GN=FOXK2;sp|Q01167-3|FOXK2_HUMAN Isoform 3 of Forkhead box protein K2 OS=Homo sapi	Forkhead box protein K2	FOXK2		0.668715	0.184647	1.9223		+	3.18624	0.00123303	4.7306	+		0.439975	0.458346	1.17551		+	4.515	0	5.15661	+	8	8	8	19.1	19.1	19.1	69.061	0	225.72	2565800000	42	Q01167;Q01167-2;Q01167-3;E9PPI7;E9PM37;I3L4U8	Q01167;Q01167-2;Q01167-3	22.3318	21.7838	20.6813	24.807	24.6544	21.1024	26.2962	26.4767	26.2158	22.1629	21.7956	22.5766	24.5941	24.3572
sp|P51571|SSRD_HUMAN Translocon-associated protein subunit delta OS=Homo sapiens OX=9606 GN=SSR4 PE=1 SV=1;tr|A6NLM8|A6NLM8_HUMAN Signal sequence receptor subunit delta OS=Homo sapiens OX=9606 GN=SSR4 PE=1 SV=1	Translocon-associated protein subunit delta	SSR4		NaN	1	0		+	4.255	0.000627451	4.55448	+		0.0629893	0.942916	0.0458069			0.0350948	0.96368	0.026626		6	6	6	35.8	35.8	35.8	18.998	0	42.849	4261700000	65	P51571;A6NLM8	P51571;A6NLM8	22.5055	21.7709	22.3461	22.5493	22.5528	21.5217	26.5252	26.8797	26.8811	27.1	27.2301	27.5093	27.4583	26.8923
sp|Q15910|EZH2_HUMAN Histone-lysine N-methyltransferase EZH2 OS=Homo sapiens OX=9606 GN=EZH2 PE=1 SV=2;sp|Q15910-3|EZH2_HUMAN Isoform 3 of Histone-lysine N-methyltransferase EZH2 OS=Homo sapiens OX=9606 GN=EZH2;sp|Q15910-2|EZH2_HUMAN Isoform 2 of Histone-l	Histone-lysine N-methyltransferase EZH2	EZH2		0.780182	0.13742	1.91428		+	4.27037	0.000836879	3.19494	+	+	3.16529	0.0147027	2.95589	+	+	3.45266	0	3.56832	+	11	11	10	20.4	20.4	18.4	85.362	0	28.965	848210000	31	Q15910;Q15910-3;Q15910-2;Q15910-5;Q15910-4;G3XAL2;E9PDH6	Q15910;Q15910-3;Q15910-2;Q15910-5;Q15910-4;G3XAL2	22.1723	21.8297	22.3045	24.9635	25.3055	21.7803	25.4179	25.0901	25.3833	21.2639	21.8238	22.2347	24.9346	24.7733
sp|O14967|CLGN_HUMAN Calmegin OS=Homo sapiens OX=9606 GN=CLGN PE=1 SV=1;sp|O14967-2|CLGN_HUMAN Isoform 2 of Calmegin OS=Homo sapiens OX=9606 GN=CLGN	Calmegin	CLGN		NaN	1	0			NaN	1	0		+	1.64176	0.0354286	-3.33558		+	4.21893	0	-5.41803		16	16	16	41.5	41.5	41.5	70.038	0	91.347	1094000000	75	O14967;O14967-2;D6RAZ4	O14967;O14967-2	22.6714	21.6253	22.757	22.1004	23.3316	21.4362	21.8176	22.5661	22.0342	27.3763	27.9762	28.0103	25.4676	25.2399
sp|Q53GI3|ZN394_HUMAN Zinc finger protein 394 OS=Homo sapiens OX=9606 GN=ZNF394 PE=1 SV=2	Zinc finger protein 394	ZNF394		0.903218	0.108452	1.88708		+	1.61287	0.00424174	3.12863	+	+	2.161	0.0186448	2.15803	+	+	2.47374	0.000337449	2.54725	+	8	7	7	22.6	18.2	18.2	64.255	0	77.747	1259200000	51	Q53GI3;Q53GI3-3;G3V1D5;Q3MJ62	Q53GI3	22.762	21.3515	24.4092	24.0037	25.4291	24.7511	25.8033	26.1084	25.9969	23.5929	22.2268	23.1923	25.3925	25.0735
sp|Q9BSC4-2|NOL10_HUMAN Isoform 2 of Nucleolar protein 10 OS=Homo sapiens OX=9606 GN=NOL10;sp|Q9BSC4|NOL10_HUMAN Nucleolar protein 10 OS=Homo sapiens OX=9606 GN=NOL10 PE=1 SV=1;sp|Q9BSC4-4|NOL10_HUMAN Isoform 4 of Nucleolar protein 10 OS=Homo sapiens OX=96	Nucleolar protein 10	NOL10		1.17427	0.0532628	1.88673		+	5.14565	0	4.4199	+		1.07049	0.0955832	2.35061		+	4.36545	0	4.43226	+	10	10	10	25.4	25.4	25.4	74.508	0	73.891	2005200000	66	Q9BSC4-2;Q9BSC4;Q9BSC4-4;H7C1Z3;Q9BSC4-3	Q9BSC4-2;Q9BSC4;Q9BSC4-4	22.0684	21.6546	21.9443	25.1389	23.6174	22.5713	26.4559	26.2899	26.1813	21.8322	22.5388	21.9829	25.637	25.3102
sp|O15014|ZN609_HUMAN Zinc finger protein 609 OS=Homo sapiens OX=9606 GN=ZNF609 PE=1 SV=2	Zinc finger protein 609	ZNF609	+	3.51778	0.0104326	-0.682137		+	3.18679	0.00186968	-0.785552			0.0124556	0.98648	0.0194454		+	1.62635	0.00959624	-0.527951		38	38	38	38.3	38.3	38.3	151.19	0	194.22	6803600000	322	O15014;E7ERY8;O15014-2	O15014	29.2125	29.3539	29.3242	28.5988	28.6892	28.5562	28.5535	28.6046	28.3759	28.1907	28.0664	28.0749	27.5684	27.6651
sp|O15015-1|ZN646_HUMAN Isoform 1 of Zinc finger protein 646 OS=Homo sapiens OX=9606 GN=ZNF646;sp|O15015|ZN646_HUMAN Zinc finger protein 646 OS=Homo sapiens OX=9606 GN=ZNF646 PE=1 SV=2	Zinc finger protein 646	ZNF646		0.0517487	0.956444	0.0291901		+	2.25763	0.00646494	-0.537186		+	2.61878	0.0200922	0.852889		+	1.66468	0.0121703	0.437105	+	35	35	35	27.8	27.8	27.8	200.76	0	223.96	6454000000	274	O15015-1;O15015;C9J3L0;H3BSD0	O15015-1;O15015	28.2524	28.4381	28.4236	28.7544	28.3149	28.1324	27.6851	27.8658	27.9518	27.3012	27.2428	27.2046	28.2096	27.8596
sp|O14828|SCAM3_HUMAN Secretory carrier-associated membrane protein 3 OS=Homo sapiens OX=9606 GN=SCAMP3 PE=1 SV=3;sp|O14828-2|SCAM3_HUMAN Isoform 2 of Secretory carrier-associated membrane protein 3 OS=Homo sapiens OX=9606 GN=SCAMP3	Secretory carrier-associated membrane protein 3	SCAMP3		NaN	1	0		+	3.63797	0.000864322	4.5352	+		1.34994	0.0770093	-0.992221		+	1.52626	0.0200241	-0.391408		8	8	8	39.8	39.8	39.8	38.287	0	320.82	3096200000	95	O14828;O14828-2	O14828;O14828-2	22.0305	20.916	21.7706	20.397	22.8344	23.5967	26.3661	25.9688	25.9878	27.418	27.3175	27.5647	26.8479	26.7012
sp|Q9BQ39|DDX50_HUMAN ATP-dependent RNA helicase DDX50 OS=Homo sapiens OX=9606 GN=DDX50 PE=1 SV=1;tr|A0A087WVC1|A0A087WVC1_HUMAN RNA helicase OS=Homo sapiens OX=9606 GN=DDX50 PE=1 SV=1	ATP-dependent RNA helicase DDX50	DDX50		1.05864	0.0707758	1.87646		+	3.42744	0.00116464	2.56081	+	+	2.80176	0.0131724	4.21892	+	+	3.88247	0	4.48844	+	19	17	17	38	34.3	34.3	82.564	0	52.239	1900900000	51	Q9BQ39;A0A087WVC1;S4R3V4;S4R3G6	Q9BQ39;A0A087WVC1	21.8885	22.4352	22.1264	25.1427	24.5037	22.4332	24.6469	25.0279	24.4578	21.4429	21.7898	22.0137	26.9181	25.8865
tr|E7EWD6|E7EWD6_HUMAN Putative Polycomb group protein ASXL2 OS=Homo sapiens OX=9606 GN=ASXL2 PE=1 SV=1;sp|Q76L83|ASXL2_HUMAN Putative Polycomb group protein ASXL2 OS=Homo sapiens OX=9606 GN=ASXL2 PE=1 SV=1;sp|Q76L83-2|ASXL2_HUMAN Isoform 2 of Putative Pol	Putative Polycomb group protein ASXL2	ASXL2		NaN	1	0		+	4.19555	0.000556522	4.51355	+		NaN	1	0			NaN	1	0		5	5	5	8.3	8.3	8.3	150.46	0	12.447	557850000	8	E7EWD6;Q76L83;Q76L83-2;A0A5F9ZHN2	E7EWD6;Q76L83;Q76L83-2	21.6585	20.8257	21.2429	21.9076	20.7922	21.5347	25.7246	25.9367	25.6065	23.2044	23.5831	22.2313	21.0241	22.9388
sp|Q8NEY8-8|PPHLN_HUMAN Isoform 8 of Periphilin-1 OS=Homo sapiens OX=9606 GN=PPHLN1;sp|Q8NEY8-9|PPHLN_HUMAN Isoform 9 of Periphilin-1 OS=Homo sapiens OX=9606 GN=PPHLN1;sp|Q8NEY8-2|PPHLN_HUMAN Isoform 2 of Periphilin-1 OS=Homo sapiens OX=9606 GN=PPHLN1;tr|F		PPHLN1		0.611664	0.214577	1.8757		+	2.96619	0.00116956	2.86378	+		0.885234	0.152403	2.18883		+	2.75077	0	3.40317	+	9	9	1	31.1	31.1	4.6	42.475	0	68.99	1362600000	25	Q8NEY8-8;Q8NEY8-9;Q8NEY8-2;F8W0Q9;Q8NEY8-6	Q8NEY8-8;Q8NEY8-9;Q8NEY8-2;F8W0Q9;Q8NEY8-6	21.7632	22.5363	22.8227	25.8937	25.2589	21.5966	25.3749	25.3458	24.9927	21.821	23.3176	22.1376	25.8616	25.4713
sp|Q96MF7|NSE2_HUMAN E3 SUMO-protein ligase NSE2 OS=Homo sapiens OX=9606 GN=NSMCE2 PE=1 SV=2;tr|E5RFJ1|E5RFJ1_HUMAN E3 SUMO-protein ligase NSE2 OS=Homo sapiens OX=9606 GN=NSMCE2 PE=1 SV=1;tr|E5RIM1|E5RIM1_HUMAN E3 SUMO-protein ligase NSE2 (Fragment) OS=Hom	E3 SUMO-protein ligase NSE2	NSMCE2		1.04275	0.0727832	1.87196		+	3.19324	0.00127757	5.15228	+	+	3.50248	0.02	3.10486	+	+	4.71498	0	6.172	+	9	9	9	40.9	40.9	40.9	27.932	0	226.87	4991200000	77	Q96MF7;E5RFJ1;E5RIM1;A0A087WTZ8;E5RHW9;E5RK09;E5RG00;H0YB96	Q96MF7;E5RFJ1;E5RIM1;A0A087WTZ8;E5RHW9	21.3578	22.257	23.1698	24.5783	24.9901	22.8322	27.2355	27.5904	27.4155	22.3836	22.0779	21.4941	25.2072	25.0339
sp|Q9UH99|SUN2_HUMAN SUN domain-containing protein 2 OS=Homo sapiens OX=9606 GN=SUN2 PE=1 SV=3;sp|Q9UH99-2|SUN2_HUMAN Isoform 2 of SUN domain-containing protein 2 OS=Homo sapiens OX=9606 GN=SUN2;sp|Q9UH99-3|SUN2_HUMAN Isoform 3 of SUN domain-containing pro	SUN domain-containing protein 2	SUN2		NaN	1	0		+	3.98756	0.000825175	4.50258	+		0.0746851	0.916909	-0.117088			0.456556	0.316652	-0.331142		15	15	15	34.4	34.4	34.4	80.31	0	113.19	2312800000	74	Q9UH99;Q9UH99-2;Q9UH99-3;B0QY60	Q9UH99;Q9UH99-2;Q9UH99-3	21.8084	21.4892	22.2991	22.0636	22.8935	22.1952	26.6495	26.0555	26.3994	26.6982	26.77	26.4358	25.9117	26.0437
sp|O15127|SCAM2_HUMAN Secretory carrier-associated membrane protein 2 OS=Homo sapiens OX=9606 GN=SCAMP2 PE=1 SV=2	Secretory carrier-associated membrane protein 2	SCAMP2		NaN	1	0			NaN	1	0			0.108234	0.876845	0.326026			0.292088	0.529623	-0.505204		3	3	3	14.3	14.3	14.3	36.648	0	13.347	135630000	5	O15127;H3BV04;H3BN93;H3BUB6;H3BPL9	O15127	22.8308	21.8717	21.5911	22.6602	21.0086	21.3233	22.1855	23.3679	22.6003	23.0752	22.8422	22.7853	22.22	22.0665
sp|P52737|ZN136_HUMAN Zinc finger protein 136 OS=Homo sapiens OX=9606 GN=ZNF136 PE=1 SV=1;tr|A0A494C0J2|A0A494C0J2_HUMAN Zinc finger protein 136 OS=Homo sapiens OX=9606 GN=ZNF136 PE=1 SV=1	Zinc finger protein 136	ZNF136		0.968277	0.0923455	1.84304		+	1.26596	0.00969802	2.43589	+		1.37688	0.060381	1.44695		+	1.91864	0.00149842	2.10093	+	12	10	10	28	20.2	20.2	62.783	0	24.735	905220000	22	P52737;A0A494C0J2;C9JR58	P52737;A0A494C0J2	21.9912	22.5047	24.8521	25.2256	24.8968	24.7547	25.1582	25.7999	25.6976	23.3479	21.7267	22.7373	24.2985	23.8525
sp|O15169|AXIN1_HUMAN Axin-1 OS=Homo sapiens OX=9606 GN=AXIN1 PE=1 SV=2;sp|O15169-2|AXIN1_HUMAN Isoform 2 of Axin-1 OS=Homo sapiens OX=9606 GN=AXIN1	Axin-1	AXIN1		1.41781	0.0528381	-0.810656			0.869391	0.0705367	-0.528144			0.377723	0.567332	-0.569096		+	1.59544	0.00487923	-0.923428		24	24	24	43.3	43.3	43.3	95.634	0	90.615	3783200000	172	O15169;O15169-2;H0Y830	O15169;O15169-2	28.0539	28.2791	28.7719	27.7735	27.6566	27.2428	28.014	28.0399	27.4665	27.253	27.4758	27.1485	25.8437	26.3941
sp|O60264|SMCA5_HUMAN SWI/SNF-related matrix-associated actin-dependent regulator of chromatin subfamily A member 5 OS=Homo sapiens OX=9606 GN=SMARCA5 PE=1 SV=1	SWI/SNF-related matrix-associated actin-dependent regulator of chromatin subfamily A member 5	SMARCA5		1.06168	0.0704	1.79938		+	4.5473	0	4.43179	+	+	3.12606	0.0142128	2.51748	+	+	3.26552	0	2.40841	+	20	8	8	20.9	9.9	9.9	121.9	0	70.173	692530000	23	O60264	O60264	21.1392	21.6563	21.1148	24.6489	22.2003	22.4593	25.8566	25.5181	25.831	22.0674	21.4395	22.1889	24.3076	24.6937
sp|P61106|RAB14_HUMAN Ras-related protein Rab-14 OS=Homo sapiens OX=9606 GN=RAB14 PE=1 SV=4;tr|X6RFL8|X6RFL8_HUMAN Ras-related protein Rab-14 (Fragment) OS=Homo sapiens OX=9606 GN=RAB14 PE=1 SV=1	Ras-related protein Rab-14	RAB14		0.033668	0.95865	-0.0815169		+	2.33605	0.00148837	4.48563	+		1.41493	0.129456	-0.472621		+	1.99129	0.0056005	-0.523108		12	12	12	68.8	68.8	68.8	23.897	0	161.76	3321300000	96	P61106;X6RFL8	P61106;X6RFL8	23.6486	21.8498	21.0328	22.1164	22.5495	21.6207	26.602	26.9146	26.4714	27.2838	27.4247	27.6058	27.1953	26.7672
sp|Q96CB8|INT12_HUMAN Integrator complex subunit 12 OS=Homo sapiens OX=9606 GN=INTS12 PE=1 SV=1;tr|A0A087WXN4|A0A087WXN4_HUMAN Integrator complex subunit 12 OS=Homo sapiens OX=9606 GN=INTS12 PE=1 SV=1	Integrator complex subunit 12	INTS12		0.94434	0.0992484	1.78004		+	3.17291	0.00129353	3.64453	+		0.385816	0.569073	0.487398		+	4.51464	0	5.61536	+	15	15	15	43.7	43.7	43.7	48.807	0	208.76	3293100000	59	Q96CB8;A0A087WXN4;E9PGI3;C9J0M6;A0A1B0GX90;C9JDP3;D6R9W3;D6R9Y5	Q96CB8;A0A087WXN4	21.5684	22.7887	22.2054	25.0243	24.4987	22.3796	25.8066	26.0975	25.592	22.0106	21.9242	22.1542	23.5723	21.9957
sp|O15230|LAMA5_HUMAN Laminin subunit alpha-5 OS=Homo sapiens OX=9606 GN=LAMA5 PE=1 SV=8	Laminin subunit alpha-5	LAMA5		NaN	1	0			NaN	1	0			0.805524	0.241592	-0.775503			0.65684	0.0719699	-1.12241		5	5	5	2.1	2.1	2.1	399.73	0	13.096	47588000	11	O15230;O15230-2	O15230	21.8659	21.2161	20.8961	22.4184	21.2416	22.3006	21.3592	22.5109	22.3411	23.2173	23.3719	22.7541	22.4973	21.5723
sp|O15254|ACOX3_HUMAN Peroxisomal acyl-coenzyme A oxidase 3 OS=Homo sapiens OX=9606 GN=ACOX3 PE=1 SV=2;sp|O15254-2|ACOX3_HUMAN Isoform 2 of Peroxisomal acyl-coenzyme A oxidase 3 OS=Homo sapiens OX=9606 GN=ACOX3	Peroxisomal acyl-coenzyme A oxidase 3	ACOX3		NaN	1	0			0.564852	0.179717	0.503972			0.692353	0.276548	-0.905338		+	2.56002	0.000242291	-2.95458		10	10	10	19	19	19	77.628	0	35.094	388230000	31	O15254;O15254-2	O15254;O15254-2	21.749	21.3714	22.2361	22.0519	22.5381	22.3734	22.8046	22.322	21.7418	25.0266	25.348	25.5748	25.286	24.6172
sp|O15258|RER1_HUMAN Protein RER1 OS=Homo sapiens OX=9606 GN=RER1 PE=1 SV=1;tr|Q5T092|Q5T092_HUMAN Protein RER1 (Fragment) OS=Homo sapiens OX=9606 GN=RER1 PE=1 SV=1;tr|A0A0A0MR06|A0A0A0MR06_HUMAN Protein RER1 (Fragment) OS=Homo sapiens OX=9606 GN=RER1 PE=1	Protein RER1	RER1		NaN	1	0			0.218401	0.668241	0.761388			0.0392261	0.955658	-0.0471516			0.54154	0.111754	-1.31506		6	6	6	34.7	34.7	34.7	22.958	0	48.656	2297200000	46	O15258;Q5T092;A0A0A0MR06;Q5T091;Q5T093	O15258;Q5T092;A0A0A0MR06;Q5T091	22.8944	23.0103	21.894	22.1894	21.8973	21.4122	21.3047	22.9821	25.796	27.243	27.196	27.3149	26.6141	27.0138
tr|Q5T8U5|Q5T8U5_HUMAN Surfeit locus protein 4 OS=Homo sapiens OX=9606 GN=SURF4 PE=1 SV=1;sp|O15260-2|SURF4_HUMAN Isoform 2 of Surfeit locus protein 4 OS=Homo sapiens OX=9606 GN=SURF4;sp|O15260|SURF4_HUMAN Surfeit locus protein 4 OS=Homo sapiens OX=9606 GN	Surfeit locus protein 4	SURF4		0.491247	0.566477	-0.18057		+	1.3619	0.0165263	0.69712	+		0.047058	0.948999	0.0866655		+	1.52806	0.00330076	-1.98603		4	4	4	23.7	23.7	23.7	21.127	0	323.31	5637900000	94	Q5T8U5;O15260-2;O15260;O15260-3;B7Z1G8	Q5T8U5;O15260-2;O15260;O15260-3	26.7412	26.792	26.7745	26.5962	26.8611	26.3088	27.1295	27.9277	27.342	28.97	27.6014	28.9579	27.9147	28.463
sp|O95025|SEM3D_HUMAN Semaphorin-3D OS=Homo sapiens OX=9606 GN=SEMA3D PE=2 SV=2	Semaphorin-3D	SEMA3D		NaN	1	0		+	2.50476	0.00141964	4.47798	+		NaN	1	0			NaN	1	0		7	7	7	14.3	14.3	14.3	89.65	0	45.281	442620000	23	O95025	O95025	22.2227	20.4339	22.7501	23.4212	22.3998	22.6316	26.263	26.3983	26.1794	21.4781	22.1821	21.8264	20.7949	21.3449
sp|P29590-2|PML_HUMAN Isoform PML-5 of Protein PML OS=Homo sapiens OX=9606 GN=PML	Protein PML	PML		0.557297	0.249173	1.77704		+	5.22253	0	5.36761	+	+	3.68422	0.0298182	4.44399	+	+	4.23196	0	4.9483	+	44	3	3	70.2	4.6	4.6	67.47	0	38.179	3348400000	31	P29590-2	P29590-2	22.1055	22.0632	21.6983	26.5434	22.4702	22.1845	27.2811	27.532	27.1567	22.0441	22.8634	22.0573	27.1004	26.8231
sp|Q9UGL1-2|KDM5B_HUMAN Isoform 2 of Lysine-specific demethylase 5B OS=Homo sapiens OX=9606 GN=KDM5B;sp|Q9UGL1|KDM5B_HUMAN Lysine-specific demethylase 5B OS=Homo sapiens OX=9606 GN=KDM5B PE=1 SV=3;tr|A0A3B3IS40|A0A3B3IS40_HUMAN [Histone H3]-trimethyl-L-lys	Lysine-specific demethylase 5B	KDM5B		0.72132	0.164356	1.76587		+	2.68236	0.00114961	6.79955	+	+	1.48507	0.0381935	5.69758	+	+	4.8032	0	9.07409	+	53	53	49	40	40	37.2	179.41	0	323.31	26194000000	408	Q9UGL1-2;Q9UGL1;A0A3B3IS40;A0A3B3IT25;A0A3B3ITE7;A0A3B3ITA8;A0A3B3ITJ7;A0A3B3ISE6;B3KV94;A0A3B3IT85;A0A3B3IS31;A0A3B3IT51;A0A3B3ITA9;A0A3B3ITR1;A0A3B3ISK2;A0A3B3ITR3;A0A3B3ITJ3;R4GN45	Q9UGL1-2;Q9UGL1;A0A3B3IS40;A0A3B3IT25;A0A3B3ITE7;A0A3B3ITA8;A0A3B3ITJ7;A0A3B3ISE6;B3KV94	21.6845	23.5087	24.9878	26.3276	24.6114	24.5396	30.1688	30.0926	30.3183	21.0777	21.5012	21.3937	29.2007	28.3548
sp|O15355|PPM1G_HUMAN Protein phosphatase 1G OS=Homo sapiens OX=9606 GN=PPM1G PE=1 SV=1	Protein phosphatase 1G	PPM1G		NaN	1	0			0.267721	0.643135	-0.297268			NaN	1	0			0.525093	0.139869	0.864283		3	3	3	6.2	6.2	6.2	59.271	0	4.3799	145860000	6	O15355	O15355	23.3539	22.7008	22.3604	23.1452	22.4503	21.9915	23.0914	22.5009	21.9311	20.9198	22.8409	23.2475	21.9985	21.5622
tr|A0A0D9SEJ5|A0A0D9SEJ5_HUMAN Constitutive coactivator of peroxisome proliferator-activated receptor gamma OS=Homo sapiens OX=9606 GN=FAM120B PE=1 SV=1;tr|F5GY05|F5GY05_HUMAN Constitutive coactivator of peroxisome proliferator-activated receptor gamma OS=	Constitutive coactivator of peroxisome proliferator-activated receptor gamma	FAM120B		0.84666	0.110041	4.01642		+	2.34495	0.00150051	4.47408	+		0.752867	0.204919	-3.06689		+	1.63535	0.00256148	-1.91325		10	10	10	15.1	15.1	15.1	105.19	0	28.043	3367300000	20	A0A0D9SEJ5;F5GY05;Q96EK7;Q96EK7-2;Q96EK7-3	A0A0D9SEJ5;F5GY05;Q96EK7;Q96EK7-2	22.308	20.3212	22.8843	21.733	27.8054	28.0243	26.3743	26.2395	26.3219	29.1273	28.5677	27.5613	27.7465	26.5167
sp|Q9UNX4|WDR3_HUMAN WD repeat-containing protein 3 OS=Homo sapiens OX=9606 GN=WDR3 PE=1 SV=1	WD repeat-containing protein 3	WDR3		0.614111	0.214566	1.76397		+	1.91613	0.00242623	5.33223	+		0.125029	0.914602	-0.0416501		+	1.63955	0.00578967	0.753794	+	26	26	26	34.4	34.4	34.4	106.1	0	145.95	6332000000	174	Q9UNX4;Q6PDA5	Q9UNX4	21.4923	21.2086	25.0051	25.0711	23.6353	24.2914	28.0907	27.8574	27.7546	27.4523	27.4755	27.2085	27.4641	27.1705
sp|O15391|TYY2_HUMAN Transcription factor YY2 OS=Homo sapiens OX=9606 GN=YY2 PE=2 SV=1	Transcription factor YY2	YY2	+	2.02844	0.0365965	-0.565463		+	3.50321	0.0014236	-0.83209			0.747164	0.258228	-0.821916		+	2.41828	0.00151757	-0.93085		12	2	2	17.2	4.3	4.3	41.347	0	14.633	53436000000	546	O15391	O15391	31.9742	31.8268	31.7403	31.1051	31.2911	31.4487	30.9734	31.0462	31.0253	31.5457	31.3945	31.3986	30.3454	29.9275
sp|Q9NUQ9|CYRIB_HUMAN CYFIP-related Rac1 interactor B OS=Homo sapiens OX=9606 GN=CYRIB PE=1 SV=1;tr|E5RI16|E5RI16_HUMAN CYFIP-related Rac1 interactor B (Fragment) OS=Homo sapiens OX=9606 GN=CYRIB PE=1 SV=1;tr|A0A1W2PRQ0|A0A1W2PRQ0_HUMAN CYFIP-related Rac1	Protein FAM49B	FAM49B		NaN	1	0		+	2.52213	0.00132881	4.46533	+	+	3.05558	0.0357949	-0.496815		+	2.6993	0.00201024	-0.570049		12	12	12	46.9	46.9	46.9	36.748	0	78.792	2009900000	95	Q9NUQ9;E5RI16;A0A1W2PRQ0;Q9NUQ9-2;E5RJE1;E5RIR8;E5RJL8;A0A087X178;E5RFS4;E5RHU5;E5RGI7;E5RK61;Q9H0Q0;E5RK81;E5RH75	Q9NUQ9;E5RI16;A0A1W2PRQ0	21.0788	21.3711	23.287	22.0379	23.5518	22.4407	26.4652	26.2948	26.3729	26.6369	26.6466	26.6476	26.2572	26.1053
tr|J3QRI7|J3QRI7_HUMAN 60S ribosomal protein L26 (Fragment) OS=Homo sapiens OX=9606 GN=RPL26 PE=3 SV=1;tr|J3QQQ9|J3QQQ9_HUMAN KOW domain-containing protein OS=Homo sapiens OX=9606 PE=3 SV=1;tr|J3QQV1|J3QQV1_HUMAN 60S ribosomal protein L26 OS=Homo sapiens O	60S ribosomal protein L26;60S ribosomal protein L26-like 1	RPL26;RPL26L1		0.900419	0.110648	1.75377		+	1.83967	0.0031139	3.77195	+	+	1.80803	0.045037	0.975005		+	2.9506	0	3.55945	+	6	6	6	51.4	51.4	51.4	12.63	0	13.387	1985700000	45	J3QRI7;J3QQQ9;J3QQV1;J3QRC4;P61254;E5RIT6;Q9UNX3;J3KSS0;E5RHH1;J3KS10	J3QRI7;J3QQQ9;J3QQV1;J3QRC4;P61254;E5RIT6;Q9UNX3;J3KSS0	21.2585	23.9982	23.9627	24.8932	24.8489	24.7385	26.7891	27.0377	26.7085	22.3699	23.141	22.9752	23.8608	23.8603
sp|O15438-4|MRP3_HUMAN Isoform 4 of Canalicular multispecific organic anion transporter 2 OS=Homo sapiens OX=9606 GN=ABCC3;sp|O15438|MRP3_HUMAN Canalicular multispecific organic anion transporter 2 OS=Homo sapiens OX=9606 GN=ABCC3 PE=1 SV=3;sp|O15438-2|MRP	Canalicular multispecific organic anion transporter 2	ABCC3		NaN	1	0			NaN	1	0			0.219276	0.772994	0.197657			0.21546	0.731658	-0.265358		3	2	2	2.9	2.3	2.3	174.91	0	5.3647	45060000	10	O15438-4;O15438;O15438-2	O15438-4;O15438;O15438-2	23.4133	21.469	22.3854	22.1949	20.6784	23.1596	20.8187	21.6705	21.2494	22.562	22.6718	22.6307	22.2297	22.7878
sp|O15439-2|MRP4_HUMAN Isoform 2 of Multidrug resistance-associated protein 4 OS=Homo sapiens OX=9606 GN=ABCC4;sp|O15439|MRP4_HUMAN Multidrug resistance-associated protein 4 OS=Homo sapiens OX=9606 GN=ABCC4 PE=1 SV=3;tr|A0A2R8YDC1|A0A2R8YDC1_HUMAN Multidru	Multidrug resistance-associated protein 4	ABCC4		NaN	1	0			0.523683	0.161869	-0.89319			1.14858	0.0908924	-1.68947		+	1.81986	0.00200877	-1.43424		6	6	6	7.4	7.4	7.4	144.2	0	7.3008	151290000	11	O15439-2;O15439;A0A2R8YDC1;A0A2R8Y6V8;O15439-4;O15439-3	O15439-2;O15439;A0A2R8YDC1;A0A2R8Y6V8;O15439-4;O15439-3	22.7541	21.7555	23.7037	21.7773	20.5951	22.6352	21.8261	20.995	22.7126	23.8065	24.3801	23.6281	23.4749	21.244
sp|Q9Y5S9|RBM8A_HUMAN RNA-binding protein 8A OS=Homo sapiens OX=9606 GN=RBM8A PE=1 SV=1;sp|Q9Y5S9-2|RBM8A_HUMAN Isoform 2 of RNA-binding protein 8A OS=Homo sapiens OX=9606 GN=RBM8A	RNA-binding protein 8A	RBM8A		0.508774	0.285709	1.71585		+	2.2508	0.00147641	3.35448	+		0.847436	0.160147	2.88655		+	2.91437	0	3.71578	+	5	5	5	50.6	50.6	50.6	19.889	0	29.804	1123600000	18	Q9Y5S9;Q9Y5S9-2;A0A0J9YW13	Q9Y5S9;Q9Y5S9-2	23.0663	21.1015	22.8114	24.801	21.4336	25.8922	25.6059	25.6647	25.7721	22.1737	20.9618	22.317	26.3125	26.1387
sp|Q92889|XPF_HUMAN DNA repair endonuclease XPF OS=Homo sapiens OX=9606 GN=ERCC4 PE=1 SV=3	DNA repair endonuclease XPF	ERCC4		0.899765	0.113285	1.69348		+	3.63923	0.000847291	4.34101	+		0.395756	0.49144	1.99298		+	1.95694	0.000667246	5.52003	+	25	25	25	39.6	39.6	39.6	104.48	0	256.15	5215000000	81	Q92889;Q92889-2;I3NI48	Q92889	21.4875	21.8608	21.9581	24.894	21.902	23.5908	26.5115	25.4915	26.3265	20.8498	22.255	24.8641	26.4482	26.3972
sp|O15535|ZSC9_HUMAN Zinc finger and SCAN domain-containing protein 9 OS=Homo sapiens OX=9606 GN=ZSCAN9 PE=1 SV=1;sp|O15535-2|ZSC9_HUMAN Isoform 2 of Zinc finger and SCAN domain-containing protein 9 OS=Homo sapiens OX=9606 GN=ZSCAN9;tr|E9PQL7|E9PQL7_HUMAN	Zinc finger and SCAN domain-containing protein 9	ZSCAN9		NaN	1	0			NaN	1	0			0.715889	0.231904	2.21156		+	2.14486	0.000837838	1.86006	+	6	4	2	21.1	17.3	6.3	45.954	0	22.558	430190000	8	O15535;O15535-2;E9PQL7;U3KQV4	O15535;O15535-2;E9PQL7	22.0303	22.3808	22.8498	20.4765	22.4576	22.9779	22.086	23.8542	21.6165	22.9048	22.6392	21.7939	26.2043	25.8464
sp|O14880|MGST3_HUMAN Microsomal glutathione S-transferase 3 OS=Homo sapiens OX=9606 GN=MGST3 PE=1 SV=1;tr|Q5VV89|Q5VV89_HUMAN Microsomal glutathione S-transferase 3 OS=Homo sapiens OX=9606 GN=MGST3 PE=1 SV=1	Microsomal glutathione S-transferase 3	MGST3		0.146914	0.82461	-0.488614		+	1.82192	0.00296998	4.45888	+		1.06009	0.174343	-0.624616		+	2.84688	0.000334694	-1.35006		7	7	7	53.3	53.3	53.3	16.516	0	323.31	8048800000	125	O14880;Q5VV89;Q5VV87	O14880;Q5VV89	21.3355	22.822	25.0646	21.5105	23.5694	22.6764	27.5184	27.3069	27.7735	29.4567	29.2488	29.0074	29.0838	28.4927
tr|M0QZ59|M0QZ59_HUMAN Zinc finger protein 304 OS=Homo sapiens OX=9606 GN=ZNF304 PE=1 SV=1;tr|E7EQD3|E7EQD3_HUMAN Zinc finger protein 304 OS=Homo sapiens OX=9606 GN=ZNF304 PE=1 SV=2;sp|Q9HCX3|ZN304_HUMAN Zinc finger protein 304 OS=Homo sapiens OX=9606 GN=Z	Zinc finger protein 304	ZNF304		0.40617	0.381878	1.69024		+	1.28333	0.00840503	3.33443	+		0.739657	0.41143	0.280558		+	1.58512	0.00735632	0.673552	+	17	14	12	35.7	32.7	28.7	69.971	0	73.683	1891600000	62	M0QZ59;E7EQD3;Q9HCX3	M0QZ59;E7EQD3;Q9HCX3	21.797	21.7254	25.272	25.9735	25.9121	21.9796	25.6015	26.4863	26.7099	24.9144	24.5696	25.1338	25.2643	25.0717
sp|P10244|MYBB_HUMAN Myb-related protein B OS=Homo sapiens OX=9606 GN=MYBL2 PE=1 SV=1;sp|P10244-2|MYBB_HUMAN Isoform 2 of Myb-related protein B OS=Homo sapiens OX=9606 GN=MYBL2	Myb-related protein B	MYBL2		0.769356	0.146854	1.68305		+	3.7345	0.000753994	6.74003	+	+	1.62019	0.0374041	2.2307	+	+	3.51205	0	5.17849	+	24	22	22	41.6	40	40	78.763	0	236.28	5142300000	87	P10244;P10244-2	P10244;P10244-2	22.3183	21.2543	21.9377	22.3926	22.7417	25.4252	28.7788	27.8063	29.1453	22.8231	21.5976	21.8451	24.0968	25.2867
sp|O43187|IRAK2_HUMAN Interleukin-1 receptor-associated kinase-like 2 OS=Homo sapiens OX=9606 GN=IRAK2 PE=1 SV=2	Interleukin-1 receptor-associated kinase-like 2	IRAK2		NaN	1	0			NaN	1	0			NaN	1	0		+	3.6535	0	2.68465	+	4	4	4	10.9	10.9	10.9	69.432	0	17.76	275370000	7	O43187	O43187	21.8487	20.9699	22.1464	23.2751	22.4598	21.46	22.0608	21.0218	21.9975	22.1264	21.5725	21.676	21.9424	22.4399
sp|P68133|ACTS_HUMAN Actin, alpha skeletal muscle OS=Homo sapiens OX=9606 GN=ACTA1 PE=1 SV=1;sp|P68032|ACTC_HUMAN Actin, alpha cardiac muscle 1 OS=Homo sapiens OX=9606 GN=ACTC1 PE=1 SV=1;sp|P63267|ACTH_HUMAN Actin, gamma-enteric smooth muscle OS=Homo sapie	Actin, alpha skeletal muscle;Actin, alpha cardiac muscle 1;Actin, gamma-enteric smooth muscle;Actin, aortic smooth muscle	ACTA1;ACTC1;ACTG2;ACTA2		0.419484	0.366163	1.67863		+	0.854095	0.0302067	3.14691	+		0.230108	0.709266	-0.952806		+	1.33992	0.00735187	1.11816	+	14	2	2	38.2	9	9	42.051	0	90.364	6791500000	57	P68133;P68032;P63267;P62736;A6NL76;C9JFL5;F6UVQ4;F6QUT6;P63267-2;F8WB63;B8ZZJ2	P68133;P68032;P63267;P62736;A6NL76;C9JFL5;F6UVQ4;F6QUT6;P63267-2;F8WB63;B8ZZJ2	26.5764	21.0456	25.5908	26.2284	25.9483	26.0721	27.2048	27.7594	27.6894	26.886	27.2524	27.2177	28.0735	22.9466
sp|O43264|ZW10_HUMAN Centromere/kinetochore protein zw10 homolog OS=Homo sapiens OX=9606 GN=ZW10 PE=1 SV=3;sp|O43264-2|ZW10_HUMAN Isoform 2 of Centromere/kinetochore protein zw10 homolog OS=Homo sapiens OX=9606 GN=ZW10;tr|F5H3C1|F5H3C1_HUMAN Centromere/kin	Centromere/kinetochore protein zw10 homolog	ZW10		NaN	1	0			0.836468	0.055928	0.809596			0.18009	0.784484	-0.363091			0.0470396	0.944455	0.0953026		2	2	2	4.1	4.1	4.1	88.828	0	47.433	203800000	24	O43264;O43264-2;F5H3C1	O43264;O43264-2;F5H3C1	21.4482	21.8075	22.8189	22.0722	21.6383	21.6233	23.1981	22.6298	22.6754	22.9214	22.9928	22.7297	23.7325	22.7111
sp|P49959|MRE11_HUMAN Double-strand break repair protein MRE11 OS=Homo sapiens OX=9606 GN=MRE11 PE=1 SV=3;sp|P49959-3|MRE11_HUMAN Isoform 3 of Double-strand break repair protein MRE11 OS=Homo sapiens OX=9606 GN=MRE11;tr|F8W7U8|F8W7U8_HUMAN Double-strand br	Double-strand break repair protein MRE11A	MRE11A		0.846971	0.123592	1.67221		+	3.78759	0.00113043	3.17754	+		0.943447	0.121739	2.94635		+	1.81088	0.00123301	5.06306	+	19	19	19	36.7	36.7	36.7	80.592	0	100.68	3724100000	71	P49959;P49959-3;F8W7U8;P49959-2;F5GXT0;F5H742;F5H256	P49959;P49959-3;F8W7U8;P49959-2	21.6939	22.2522	22.4429	24.9037	24.4593	22.0427	25.2738	25.2325	25.4153	20.4645	24.7643	23.0253	26.7279	26.1459
sp|O43291|SPIT2_HUMAN Kunitz-type protease inhibitor 2 OS=Homo sapiens OX=9606 GN=SPINT2 PE=1 SV=2;tr|K7EM91|K7EM91_HUMAN Kunitz-type protease inhibitor 2 OS=Homo sapiens OX=9606 GN=SPINT2 PE=1 SV=1;sp|O43291-2|SPIT2_HUMAN Isoform 2 of Kunitz-type protease	Kunitz-type protease inhibitor 2	SPINT2		NaN	1	0			NaN	1	0			0.746856	0.387712	-0.305051		+	1.73667	0.0164257	-0.361811		7	7	7	35.7	35.7	35.7	28.228	0	47.151	1987700000	56	O43291;K7EM91;O43291-2;K7EKQ0;K7ESI5;K7EQZ3;K7ES27	O43291;K7EM91;O43291-2;K7EKQ0;K7ESI5	23.9495	22.7432	22.0286	21.8966	22.6871	22.3386	21.3291	22.1013	22.8222	26.8879	27.0461	26.7369	26.8126	26.6784
sp|Q9NPI1-2|BRD7_HUMAN Isoform 2 of Bromodomain-containing protein 7 OS=Homo sapiens OX=9606 GN=BRD7;sp|Q9NPI1|BRD7_HUMAN Bromodomain-containing protein 7 OS=Homo sapiens OX=9606 GN=BRD7 PE=1 SV=1	Bromodomain-containing protein 7	BRD7		0.569032	0.243591	1.6654		+	3.04195	0.0013	5.41146	+		0.391806	0.518453	0.995705		+	2.10314	0.000574487	3.13467	+	12	12	12	30.4	30.4	30.4	74.266	0	50.705	1598100000	37	Q9NPI1-2;Q9NPI1;I3L4V5	Q9NPI1-2;Q9NPI1	22.1329	20.291	22.0738	25.4669	22.1027	21.9243	27.1056	26.7626	26.864	21.75	22.8494	23.9222	24.975	24.406
sp|O43296|ZN264_HUMAN Zinc finger protein 264 OS=Homo sapiens OX=9606 GN=ZNF264 PE=1 SV=1	Zinc finger protein 264	ZNF264	+	3.31293	0.0182825	-0.555052			0.512459	0.25559	-0.393137			1.3117	0.0985686	-0.763089			0.0635433	0.945413	-0.0315336		18	16	11	39.2	36.4	26.5	70.586	0	61.772	3281200000	107	O43296;M0QXF3;M0R146;M0QZT5;M0QZJ4	O43296	27.1146	27.0727	27.1057	26.6221	26.445	26.5607	26.2609	26.4891	27.3635	26.9168	26.8509	27.1399	26.5591	26.3558
sp|Q6UB99|ANR11_HUMAN Ankyrin repeat domain-containing protein 11 OS=Homo sapiens OX=9606 GN=ANKRD11 PE=1 SV=3;tr|A0A2R8Y438|A0A2R8Y438_HUMAN Ankyrin repeat domain-containing protein 11 (Fragment) OS=Homo sapiens OX=9606 GN=ANKRD11 PE=1 SV=1	Ankyrin repeat domain-containing protein 11	ANKRD11		1.07929	0.0699109	1.6577		+	3.10477	0.00128211	1.68361	+		0.527073	0.365983	1.34347		+	2.35224	0.000328328	3.05804	+	8	8	8	3.5	3.5	3.5	297.91	0	21.429	746170000	15	Q6UB99;A0A2R8Y438;A0A087WTN8;A0A2R8YE03;A0A2R8YEI0;X5D778;A0A2R8Y4T9	Q6UB99;A0A2R8Y438	21.9409	21.4877	21.5215	24.4777	23.4109	22.0346	23.533	23.3211	23.1468	22.6741	21.5115	22.593	24.823	24.4886
sp|Q8N8K9|K1958_HUMAN Uncharacterized protein KIAA1958 OS=Homo sapiens OX=9606 GN=KIAA1958 PE=1 SV=1;sp|Q8N8K9-3|K1958_HUMAN Isoform 3 of Uncharacterized protein KIAA1958 OS=Homo sapiens OX=9606 GN=KIAA1958	Uncharacterized protein KIAA1958	KIAA1958		0.593408	0.229244	1.64791		+	3.50591	0.00114706	5.84385	+		NaN	1	0		+	3.64425	0	4.00295	+	14	14	7	34.4	34.4	13.3	79.211	0	323.31	2553000000	69	Q8N8K9;Q8N8K9-3	Q8N8K9;Q8N8K9-3	21.4175	22.9663	22.7604	25.9821	22.0256	24.0802	28.0936	28.1	28.4822	22.0258	21.4227	22.2963	21.7143	22.8157
tr|J3QRS3|J3QRS3_HUMAN Myosin regulatory light chain 12A OS=Homo sapiens OX=9606 GN=MYL12A PE=1 SV=1;sp|P19105|ML12A_HUMAN Myosin regulatory light chain 12A OS=Homo sapiens OX=9606 GN=MYL12A PE=1 SV=2;sp|O14950|ML12B_HUMAN Myosin regulatory light chain 12B	Myosin regulatory light chain 12A;Myosin regulatory light chain 12B;Myosin regulatory light polypeptide 9	MYL12A;MYL12B;MYL9		0.480364	0.312394	1.63322		+	4.19078	0	6.72484	+		0.196875	0.757118	-0.476414		+	2.01752	0.000562445	3.95875	+	11	11	11	53.1	53.1	53.1	20.457	0	323.31	7802200000	118	J3QRS3;P19105;O14950;J3KTJ1;P24844;P24844-2	J3QRS3;P19105;O14950;J3KTJ1;P24844	21.307	21.6426	21.7346	21.3618	22.1175	26.1046	28.3075	28.907	27.6443	23.3539	25.1858	25.6461	24.9898	24.7304
sp|O43435-3|TBX1_HUMAN Isoform C of T-box transcription factor TBX1 OS=Homo sapiens OX=9606 GN=TBX1;tr|A0A3B3IS18|A0A3B3IS18_HUMAN T-box transcription factor TBX1 OS=Homo sapiens OX=9606 GN=TBX1 PE=1 SV=1;sp|O43435-2|TBX1_HUMAN Isoform B of T-box transcrip	T-box transcription factor TBX1	TBX1		NaN	1	0			0.32758	0.407034	1.14135			0.725975	0.214289	-3.43286		+	1.2222	0.012732	-0.801455		24	24	24	71.3	71.3	71.3	52.666	0	323.31	18378000000	248	O43435-3;A0A3B3IS18;O43435-2;O43435;O75333	O43435-3;A0A3B3IS18;O43435-2;O43435	23.0657	22.6575	21.4207	21.6125	21.9515	20.6141	22.2026	22.153	26.2124	30.285	30.7958	30.1198	29.0429	29.2009
sp|O43439-5|MTG8R_HUMAN Isoform 5 of Protein CBFA2T2 OS=Homo sapiens OX=9606 GN=CBFA2T2;tr|E5RG85|E5RG85_HUMAN Protein CBFA2T1 (Fragment) OS=Homo sapiens OX=9606 GN=RUNX1T1 PE=1 SV=1;sp|Q06455-4|MTG8_HUMAN Isoform 4 of Protein CBFA2T1 OS=Homo sapiens OX=96	Protein CBFA2T2;Protein CBFA2T1;Protein CBFA2T3	CBFA2T2;RUNX1T1;CBFA2T3		NaN	1	0			0.672903	0.140912	0.431262			NaN	1	0			NaN	1	0		2	2	2	5.5	5.5	5.5	65.877	0	6.0568	106790000	11	O43439-5;E5RG85;Q06455-4;A0A087WWT6;E5RHJ8;A0A0A0MSU1;E7ETA8;Q06455-6;Q06455-5;O75081-2;O43439-2;H3BNH2;O43439-3;Q06455-2;Q06455;O43439;O43439-4;Q06455-3;O75081;O75081-4	O43439-5;E5RG85;Q06455-4;A0A087WWT6;E5RHJ8;A0A0A0MSU1;E7ETA8;Q06455-6;Q06455-5;O75081-2;O43439-2;H3BNH2;O43439-3;Q06455-2;Q06455;O43439;O43439-4;Q06455-3;O75081;O75081-4	22.8698	22.1562	23.1069	22.1593	22.4955	21.0944	23.0744	23.2506	23.1017	22.0344	22.1121	22.005	22.0305	21.7114
sp|O43474-4|KLF4_HUMAN Isoform 3 of Krueppel-like factor 4 OS=Homo sapiens OX=9606 GN=KLF4;sp|O43474-1|KLF4_HUMAN Isoform 2 of Krueppel-like factor 4 OS=Homo sapiens OX=9606 GN=KLF4;sp|O43474|KLF4_HUMAN Krueppel-like factor 4 OS=Homo sapiens OX=9606 GN=KLF	Krueppel-like factor 4	KLF4		1.05359	0.154049	-0.438934		+	1.41697	0.00811342	-1.56365			0.0196575	0.973843	0.100592			NaN	1	0		3	3	3	12.6	12.6	12.6	45.639	0	7.9229	99234000	11	O43474-4;O43474-1;O43474	O43474-4;O43474-1;O43474	24.4077	24.2246	24.8645	23.9683	24.112	24.0996	22.0741	23.7226	23.009	21.4942	22.2191	24.0395	22.2434	20.2901
sp|O43491|E41L2_HUMAN Band 4.1-like protein 2 OS=Homo sapiens OX=9606 GN=EPB41L2 PE=1 SV=1;tr|E9PHY5|E9PHY5_HUMAN Band 4.1-like protein 2 OS=Homo sapiens OX=9606 GN=EPB41L2 PE=1 SV=1;sp|O43491-4|E41L2_HUMAN Isoform 4 of Band 4.1-like protein 2 OS=Homo sapi	Band 4.1-like protein 2	EPB41L2		1.12705	0.116312	0.575962			0.493765	0.21649	-0.617118			0.899023	0.129696	4.32795		+	2.5146	0.000243363	3.41317	+	24	24	24	36.8	36.8	36.8	112.59	0	216.55	3248400000	82	O43491;E9PHY5;O43491-4;E9PK52;O43491-3;O43491-2;E9PII3;A0A2R8Y5B3;Q6R5J7;H0Y5B0;E9PQD2;E9PMV8;E9PQN0;E9PRG1;E9PIG0;E9PJP4;Q6ZSX4;E9PN54;E9PMG5;E9PPC9;J3QS55;A0A1B0GTF8;A0A0A0MSA4;A0A0A0MRA8;A8K968;Q9Y2J2-4;Q9Y2J2-3;Q9Y2J2-2;Q9Y2J2	O43491;E9PHY5;O43491-4;E9PK52;O43491-3;O43491-2;E9PII3;A0A2R8Y5B3	22.2645	22.6881	23.008	23.1452	23.1018	23.4415	22.7973	21.0921	22.2199	21.7283	23.3529	22.2075	28.5031	29.3694
sp|Q9NTZ6|RBM12_HUMAN RNA-binding protein 12 OS=Homo sapiens OX=9606 GN=RBM12 PE=1 SV=1	RNA-binding protein 12	RBM12		0.870086	0.117776	1.63107		+	3.60285	0.000974504	6.50298	+		0.473213	0.439332	-0.970282		+	1.50046	0.00288346	2.95267	+	14	14	14	20.5	20.5	20.5	97.394	0	118.29	3266800000	74	Q9NTZ6	Q9NTZ6	21.7389	21.6728	22.9584	22.2269	24.6118	24.4246	28.373	28.2393	29.2668	21.3244	24.4016	22.8273	21.8633	21.9362
sp|Q9BVK6|TMED9_HUMAN Transmembrane emp24 domain-containing protein 9 OS=Homo sapiens OX=9606 GN=TMED9 PE=1 SV=2	Transmembrane emp24 domain-containing protein 9	TMED9		0.0408137	0.951516	0.155008		+	1.82106	0.00304101	4.42823	+		1.15562	0.134348	-0.695026		+	3.10006	0.000254925	-1.5173		9	9	8	54	54	46.8	27.277	0	257.94	10025000000	193	Q9BVK6	Q9BVK6	24.2087	21.8198	25.5061	23.2354	23.3453	25.4189	28.0535	28.4202	28.3456	29.6315	29.4247	29.5512	28.7765	28.3975
sp|P07900|HS90A_HUMAN Heat shock protein HSP 90-alpha OS=Homo sapiens OX=9606 GN=HSP90AA1 PE=1 SV=5;sp|P07900-2|HS90A_HUMAN Isoform 2 of Heat shock protein HSP 90-alpha OS=Homo sapiens OX=9606 GN=HSP90AA1	Heat shock protein HSP 90-alpha	HSP90AA1		0.831434	0.12848	1.59093		+	0.933617	0.0265517	1.7792	+	+	2.05618	0.0235851	1.49491	+	+	3.11339	0	1.73677	+	19	10	10	29.8	17.1	17.1	84.659	0	55.017	1333600000	54	P07900;P07900-2;G3V2J8;Q14568;Q58FG0;Q58FG1	P07900;P07900-2	25.548	22.4961	24.3131	25.7908	25.6588	25.6804	25.7325	25.918	26.0442	24.0419	23.5115	23.7888	25.5847	25.5104
sp|O43676|NDUB3_HUMAN NADH dehydrogenase [ubiquinone] 1 beta subcomplex subunit 3 OS=Homo sapiens OX=9606 GN=NDUFB3 PE=1 SV=3;tr|C9JKQ2|C9JKQ2_HUMAN Complex I-B12 (Fragment) OS=Homo sapiens OX=9606 GN=NDUFB3 PE=1 SV=1	NADH dehydrogenase [ubiquinone] 1 beta subcomplex subunit 3	NDUFB3		0.00209711	0.997769	0.00535202			0.607565	0.105979	1.11402			0.214917	0.780548	-0.185151			0.0596302	0.952154	0.0249983		8	8	8	79.6	79.6	79.6	11.402	0	81.191	25507000000	147	O43676;C9JKQ2	O43676;C9JKQ2	26.824	28.6383	29.5899	28.0533	28.7067	28.3082	29.41	29.2671	29.7171	29.9702	30.1435	29.9024	29.4267	29.5647
tr|C9J9K3|C9J9K3_HUMAN 40S ribosomal protein SA (Fragment) OS=Homo sapiens OX=9606 GN=RPSA PE=1 SV=8;tr|A0A0C4DG17|A0A0C4DG17_HUMAN 40S ribosomal protein SA OS=Homo sapiens OX=9606 GN=RPSA PE=1 SV=1;sp|P08865|RSSA_HUMAN 40S ribosomal protein SA OS=Homo sap	40S ribosomal protein SA	RPSA		1.08233	0.0706501	1.58072		+	4.38587	0.000537815	3.38427	+		0.740726	0.246661	1.07658		+	3.35674	0	4.27294	+	9	9	9	49.4	49.4	49.4	29.404	0	105.95	1765900000	44	C9J9K3;A0A0C4DG17;P08865;F8WD59	C9J9K3;A0A0C4DG17;P08865;F8WD59	22.4958	22.356	22.8682	25.016	24.6101	22.836	26.0286	25.7922	26.052	22.1956	21.6221	22.8958	24.3514	23.1424
sp|O94906|PRP6_HUMAN Pre-mRNA-processing factor 6 OS=Homo sapiens OX=9606 GN=PRPF6 PE=1 SV=1;sp|O94906-2|PRP6_HUMAN Isoform 2 of Pre-mRNA-processing factor 6 OS=Homo sapiens OX=9606 GN=PRPF6	Pre-mRNA-processing factor 6	PRPF6		1.15783	0.0600521	1.57498		+	3.44346	0.00115895	3.34397	+		0.823077	0.181332	2.03395		+	4.19416	0	6.84231	+	25	25	25	34.8	34.8	34.8	106.92	0	110.3	3936800000	60	O94906;O94906-2	O94906;O94906-2	22.4496	21.843	22.1037	23.3467	24.9059	22.8687	25.3002	25.9526	25.1754	21.7634	20.5665	21.323	24.3841	24.2989
sp|Q96SK3-3|ZN607_HUMAN Isoform 3 of Zinc finger protein 607 OS=Homo sapiens OX=9606 GN=ZNF607;sp|Q96SK3|ZN607_HUMAN Zinc finger protein 607 OS=Homo sapiens OX=9606 GN=ZNF607 PE=1 SV=3;sp|Q96SK3-2|ZN607_HUMAN Isoform 2 of Zinc finger protein 607 OS=Homo sa	Zinc finger protein 607	ZNF607		1.06542	0.0729843	1.5611		+	3.98054	0.000778878	4.14265	+		0.581943	0.332442	-1.13119		+	3.43964	0	2.96764	+	10	9	9	16	14.7	14.7	80.435	0	52.078	2221500000	44	Q96SK3-3;Q96SK3;Q96SK3-2;K7EN48	Q96SK3-3;Q96SK3;Q96SK3-2	21.6897	22.4822	21.9521	24.3163	24.1822	22.3088	25.9148	26.3437	26.2935	23.6992	23.682	24.1644	24.4214	21.8914
[truncated: 1,867 more rows]
[truncated: 4 more columns]
